# Supplementary material for: Molecular evolution of Phox-related regulatory subunits for NADPH oxidase enzymes
Source: PubMed Central journal article supplement (PMC2121648; doi:10.1186/1471-2148-7-178), 2007-09-27
Supplement: 1471-2148-7-178-S3.pdf [file 1471-2148-7-178-S3.pdf]

### Additional File 3

#### Alignment of characterized domains of Nox regulatory subunits.

We used the following naming: Hs (*H. sapiens*), Cf (*C. familliaris*), Rn (*R. norvegicus*), Mm (*M. musculus*), Gg (*G. gallus*), Xt (*X. tropicalis*), Dr (*D. rerio*), Tr (*T. rubripes*), Tn (*T. nigroviridis*), Ol (*O. latipes*), Ci (*C. intestinalis*), Sp (*S. purpuratus*), Dd (*D. discoideum*), An (*A. nidulans*), Mg (*M. grisea*), Fg (*F. graminearum*).

#### PX and tandem SH3 domains of Nox organizers (vertebrate p47phox, vertebrate NOXO1, *C. intestinalis* and *S. purpuratus* p47phox-like proteins).

Gray boxes indicate the amino acid sequences corresponding to the PX (residues 3-132), bis-SH3 (residues 151-285) domains of human p47phox.

|            | PX-domain                                                    |    |
|------------|--------------------------------------------------------------|----|
| Hs-p47phox | -----MGDTFIRHIALLGFEKRFVPSQHY-----VYMFLVKWQDLSEKV            | 39 |
| Cf-p47phox | -----MGDTFIRHIALLGFEKRFVPSQHY-----VYMFLVKWHDLSEKV            | 39 |
| Mm-p47phox | -----MGDTFIRHIALLGFEKRFVPSQHY-----VYMFLVKWQDLSEKV            | 39 |
| Rn-p47phox | -----MGDTFIRHIALLGFEKRFVPSQHY-----VYMFLVKWQDLSEKV            | 39 |
| Gg-p47phox | -----VGDTFIRHIELLRYEKRFVPSQHY-----VYMFLVKWQDLSEKL            | 39 |
| Xt-p47phox | -----MTEPHIRHIQLLGFEKRFVPSQHY-----VYMFVVKWQDLTEKL            | 39 |
| Tn-p47phox | -----MADTYVRHVQLLGFEKRFVPSQHY-----VYMLLVKWSDLTEKL            | 39 |
| Tr-p47phox | -----MAETYVRHVQLLGFEKRFVPSQHY-----VYMLLVKWSDLTEKL            | 39 |
| Ol-p47phox | -----MEDVYVRHVQLLGFEKRFVPSQHY-----VYMLLVKWSDLTEKL            | 39 |
| Dr-p47phox | -----MAETYVRHVQLLGFEKRFVPSQHY-----VYMLLVKWSDLTEKL            | 39 |
| Ci-p47phox | -----MVNRTLKSVKVIDIEKRRLPSKHY-----VYLIEIKWSDGSLCT            | 39 |
| Sp-p47phox | -----MGKRTVVNANVTDIEKRREPTKHY-----VYIIHVTWSDGSVNV            | 39 |
| Dr-NOXO1   | -----LIKLFIRRVEHRNMDINHSSPPQ-----LYMTTVLWSDGNEIT             | 39 |
| Ol-NOXO1   | -----PADTHMSLSVSAPGSDKLLPSDDRKY-----TFMVSGIWSDGSEII          | 42 |
| Tn-NOXO1   | METQRYPISARLVGVLHKEKSKVGAHKSQVVLFHARFNQQLCPLQMYMTSVLWSDHNEIV | 60 |
| Gg-NOXO1   | -----YMMFVSWSDQNNIL                                          | 14 |
| Xt-NOXO1   | -----WSDHNEIL                                                | 8  |
| Hs-NOXO1   | MAGPRYPVSVQGAALVQIKRLQT-----FAFSVRWSDGSDTF                   | 37 |
| Cf-NOXO1   | MAGSRHPVSVRAAALVQTGRLQT-----FAFSVCWSDGSDTF                   | 37 |
| Mm-NOXO1   | MASPRHPVSAHAVALVQMDRLQT-----FAFSVCWSDNSDTF                   | 37 |

Rn-NOX01 MASPRHPVSAHAVALVQMERLQT-----FAFSVCWSDNSDTF 37  
 \* \*

Hs-p47phox VYRRFTEIYEFHKTLKEMFPIEAGAINPENRIIPHLPAKP-----WFDGQRA---AENRQ 91  
 Cf-p47phox VYRRFTEIYEFHKMLKEMFPIEAGDINPENRIIPHLPAPR-----WFDGQRA---AESRQ 91  
 Mm-p47phox VYRKFTIYEFHKMLKEMFPIEAGEIHTENRVIIPHLPAPR-----WFDGQRA---AESRQ 91  
 Rn-p47phox VYRKFTIYEFHKMLKEMFPIEAGEIHTENRVIIPHLPAPR-----WYDGQRA---AESRQ 91  
 Gg-p47phox IYRRFTDIYEFHKALKEMFPIESGDINAENRIIPHLPAKP-----WFDGQRS---TQSRQ 91  
 Xt-p47phox VYRKFTIYEFHKSLEKEMFPIEAGDISKEHRTIPHLPAKP-----WFDGLRS---TENRQ 91  
 Tn-p47phox IYRTYPEIYTFHKALKEMFPIEAGKIEKRDRIPSLPAPP-----WLDQSKS---TETRQ 91  
 Tr-p47phox IYRTYPEIYTFHKSLEKEMFPIEAGKIEKRDRIPSLPAPP-----WLDQSKS---TETRQ 91  
 Ol-p47phox IYRSYPEIHTFHKSLKDMFPIEAGQIEAKDRIPKLPAPR-----WLESQKS---RENK 91  
 Dr-p47phox VYRRYPEVHTLHKLKEMFPIEAGDIDEKDRIPKLPAPR-----WLDNQKT---TETRQ 91  
 Ci-p47phox VGRRFSAFFMMHMTLLEKFPLEGGQKDPSSRRILPFLPGKI-----LFKRSHTRDVTLKRL 94  
 Sp-p47phox VYRRYSTFFDFQNKLLSKFPEEAGANNPSSRCIPFLPGKK-----LFGRSHIREVALKRL 94  
 Dr-NOX01 VYRSLEDFKKMHRQLKKKFPSPN-PFKRSARIVPEFKGN-----KWSGSK-SVLRM 88  
 Ol-NOX01 IYRSFKDFKFFHDQLKKQFPNLT-PFRKEDRMLPKFNGKAR----RSLKQKGSKSVKQM 97  
 Tn-NOX01 VYRTFQDFRKMH-KLKRSGKKK-PTR-----SLVRL 90  
 Gg-NOX01 IYRTLEEFKRFHKLKRFPIESGSLRRSDRTIPRFKDIING----KQKSGKINRSLERL 70  
 Xt-NOX01 IYRTFEDFKLNRQLKKKFPLEAGLFRKSDNLPKLDV-----IFRKNRTNRFIERL 63  
 Hs-NOX01 VRRSWDEFRLKKTLEKTFVEAGLLRRSDRVLPKL-----DAPLLGRVGRTRGLARL 92  
 Cf-NOX01 VRRSWAEFKELHKLKEAFPVEAGLLRRSDRILPKLP-----DTSLLVRGGRTGRGLARL 92  
 Mm-NOX01 VRRSWDEFRLQKTLKTFVEAGLLRRSEQVLPKLP-----DAPLLTRRGHTGRGLVRL 92  
 Rn-NOX01 ARRSWEEFRQLQKTLKIFVVEAGLLQRSERVLKLPQACRNAPLLTRRGHTGRGLLRL 97  
 \* \* \*\* \*

Hs-p47phox GTLTEYCGTLMSPKISRCPHLLDFFKVRPDDLKLPD--NQTKKPETYLMPKD-GKS- 147  
 Cf-p47phox GTLTEYNTLMGLPVKISRCQQLDFFRVPRPDDLKLPD--SQVKKPETYLVPKD-GKS- 147  
 Mm-p47phox GTLTEYFNGLMGLPVKISRCPHLLDFFKVRPDDLKLPD--SQAKKPETYLVPKD-GKN- 147  
 Rn-p47phox GTLTEYFNGLMGLPMKISRCPHLLNFFKVRPDDLKLPD--SQVKKPETYLTAKD-GKN- 147  
 Gg-p47phox GTLAEYCYTLVNLPHKISRCRHVVSFFEVPRPDDMNPTD--SQIRKPEVFLPKD-AKK- 147  
 Xt-p47phox VTLSDYFSSLLSLPPKISRCPHVNLFFQVRSDDVNPVANN-TNGRKPETFLKVDATAK- 149  
 Tn-p47phox TSLSDYCALVNLPPHISRCRTHLTSLFKVRPEDENPAAP--NTLKRNETFVVSRLDARG- 148  
 Tr-p47phox TTLSDYCHSLVNLPPHISRCRTHLTGFFTVRPEDENPPSP--NILKRNETFVVSRLDARG- 148  
 Ol-p47phox TTLVDYCHLLVSLPPHISRCRCKELSNFFKVRPEDENPPAP--NITKRNETFVVSKEPAQG- 148  
 Dr-p47phox ATLAEYCRSLLNLPANISRCQLIRDFKMRPEDETPPAP--HPYKRNETFIMSTNRVRSN 149  
 Ci-p47phox GSISEYCESLLLLPEHISQCDTILRFFETSSSDIARDTK-----EKT-QSTAVSQ 143  
 Sp-p47phox SPIDEYCTALVKLPGKISDSKEVINFFTPPEDVSPSP-----DGGGESTRGRA 144  
 Dr-NOX01 KALEEYCGQLLKSDAQVCRSSELIQFLLPKAHDNLADFAKNCIVIMPSDVTLGSSKA--E 146  
 Ol-NOX01 EFLESYCDKLLKCDPNVTSSEVTRFFTPKDQDLQPDFTKNSSLLLVYGR-PGALRS--S 154  
 Tn-NOX01 KFLQKYNELLSCEPRVQSADLIQFFHPNAQDLEPEFSKNRQEEVKAEGHGSVG---- 146  
 Gg-NOX01 KLETYTQELLKVDAKISQGEDVIQFFKAQTQDLDCFPEDSVVIMPSEIGGEKKKEVQQ 130  
 Xt-NOX01 RLLEKYSQELLRTDQKISQCDLVLFKFFTPSNNDLNPKEPENSVMMSDSKDKQKQKPL 123  
 Hs-NOX01 QLLETYSRRLATAERVARSPITGFFAPQPLDLEPALPPGSRVILPTPEEQPLSRA--- 149  
 Cf-NOX01 RLLEDYTRALLAAAEQLRSRAVLTGFFEPQVLDLEPVLPPGSLVILPTPEE-PHRRP--- 148  
 Mm-NOX01 RLLEDYVQALLATSEHILRSALHGFFVPKPLDLEPMLPPGSLVILPTPEE-PLSQP--- 148  
 Rn-NOX01 RLLETYVRSLLATSQHIVTSSTLNSFFAPKPLDLEPMLPPGSLVILPTPEE-PLSQP--- 153  
 \* \* \*

bis-SH3 domains

Hs-p47phox TATDITGPIILQTYRAIANYEKTSGSE--MALSTGDVVEVVEKSESGWWFCQMKAKR-GW 204

Cf-p47phox SVTDITGPIILQTYRAIADFEKTSSSQ--MALATGDVVDVVEKSESGWWFCQTKTKR-GW 204  
 Mm-p47phox NVADITGPIILQTYRAIADYEKSSGTE--MTVATGDVVDVVEKSESGWWFCQMKTTR-GW 204  
 Rn-p47phox NVADITGPIILQTYRAIADYEKSSKTE--MTVATGDVVDVVEKSESGWWFCQMKTTR-GW 204  
 Gg-p47phox NTSDITGPIVLQTYRAIADYEKSSKSE--MAVKAGDAVDVVEKSETGWWFCQLKTKR-GW 204  
 Xt-p47phox NVSDITGPIILQSYRVIADYEKNSKSE--LAAKNGDVVEIVEKSENGWWFCQLRNKR-GW 206  
 Tn-p47phox NASEISGPIILDYRAIADYTKTKYE--INLLAGDQVEIVEKNQNGWWFCQMSKR-GW 205  
 Tr-p47phox NVSEISGPIILDYRAIADYTKTKYE--INLHAGDQVEIVEKNQNGWWFCQCDSCR-GW 205  
 O1-p47phox TAAEISGPIILDYRVIADFEKTSKHE--LNLHDGDLVEILEKNSNGWWFCQCEAKR-GW 205  
 Dr-p47phox TTSEITGPIILETYRVIADYSKSSKYE--LTLKMGDMVDIVEKSPNGWWFCQCESRR-GW 206  
 Ci-p47phox IIQDITGPIELETYIAIADYKAEAKTQ--ISLHSGTVEVVEKSESGWWLVCNTYGSNGW 201  
 Sp-p47phox DIGNISEPIQAEQYIVVADYKQKQKNE--VELTAGDLVEVFEKNDNGWVFT-VHDQHG 201  
 Dr-NOX01 SNSGVTQPFVTETRYCIANYETKDTKNRPFKVEVDETVDVLIKDKGWWLVENESKHLAW 206  
 O1-NOX01 GAGNVTHPFVTQTYRCVAPYETRDTKNRPFKVAADKLDVLIKDPAGWWLVESENKRLAW 214  
 Tn-NOX01 ---NVTQPFVTVTYRCVSQYETKDTKNRPFKVAADKLDVLIKDKAGWWLVENEKRM 203  
 Gg-NOX01 QQLSITYPQVSQSYRCIETFETKDTKNKTFKVAKEIVEVLLKDMTGWWLVENADKQIAW 190  
 Xt-NOX01 PEAPAIHPVVSQYICMEDYETKDTKNRPFKVRHELVGVLIKENTGWWLVENEKHLAW 183  
 Hs-NOX01 AGRLSIHSLEAQSRLCLQPFCTQDTRDRPFQAQAQESLDVLLRHPSGWWLVENEDRQTAW 209  
 Cf-NOX01 PHSPAICSLEAQSRLCLQPFSTQDTGQWPFHARAQEVIDVLLRHPSGWWLVANEEQQMAW 208  
 Mm-NOX01 RGSLDIHSLEAQSIPCVQPFHTLDIRDRPFHTKAQEILDILLRHPSGWWLVENKDDQVAW 208  
 Rn-NOX01 IGSLAIHSLEAQSMLCLQPFHTLTKDRPFHTKAQEILDILLRHPSGWWLVENKDDQTAW 213

\* \* \* \*\* \*

Hs-p47phox **IPASFLEPLD-SPDETEDPEPNYAG---EPYVAIKAYTAVEGDEVSLLEGEAVEV IHKLL** 260  
 Cf-p47phox VPASYLEPLD-SPDEAEDPEPNYEG---EPYVTIKAYTAEMEDEMSELGEAEIV IHKLL 260  
 Mm-p47phox VPASYLEPLD-SPDEAEDPDPNYAG---EPYVTIKAYA AVEEDEMSELSEGEAEIV IHKLL 260  
 Rn-p47phox VPASYLEPLD-SPDEAEDPDPNYAG---EPYVTIKAYA AVEEDEVSLSEGEAEIV IHKLL 260  
 Gg-p47phox VPAAYLEPMD-GPDESEEQEPNYAG---ELYVVQKSYTAVEEDELTLKEGDTIEV IHKLL 260  
 Xt-p47phox MPAAYLEPLD-GPDESEEQDPNYEG---DLHITTKDYSGELDDELSQLGEGENVEV IHKLL 262  
 Tn-p47phox VPASYLEPLD-GPEESEEAADPDYEGS---ELFITIKAYKAEQEDEISLDLGESIEV IHKLL 262  
 Tr-p47phox VPASYLEPLD-GPEESEEAADPDYEGS---ELFITIKAYKAEQEDEITLDELGIESIEV IHKLL 264  
 O1-p47phox VPASYLEPLD-GPEEAEAAEPDYEG---ELHVTTNAYKAEQDDEISLDLGETVEV IHKLL 261  
 Dr-p47phox VPASYLEPLD-GADESEEPPEPNYAG---ELYKTRRGYKAVEQDEMTLEAGVIEV IHKLL 262  
 Ci-p47phox VPGAYLEKED-GSEEDLVTEKA AVGGQ-TWYVATSHYDATSNDEISFPMGAALVQLVNL 259  
 Sp-p47phox APGTFQLQNPD-GQEEDE-ETLIPGND-ESYITNNAYQQAQAEDEISFETGVVTVIQKSL 258  
 Dr-NOX01 FPAPYLERAEMADDGPDEMDFQSGAVFYVATKAYKATNSDELVELGSLVLEVLQKSD 266  
 O1-NOX01 FPAPYLE---VLDGEDEDDEGNL---GSLYCAVRSYSTKKNDEVPLSIGSVVEVLKSD 268  
 Tn-NOX01 FPAPYLEK---LEEDGEDDDTGDTR---TLYLTAKNYKASKGDEISVAVGAVVEVLKSD 257  
 Gg-NOX01 FPASYLEQ---ISAHKDIQNVESDEEGSLYFVMRAYEAQKADELSLNKGVVVEVRRSD 247  
 Xt-NOX01 FPAPYLKD---VDNSED TDSG-TSEDEGLVLYAAKAYEAMNSDEVSI TVGLVVEVIEKSN 239  
 Hs-NOX01 FPAPYLEE---AAPGQREGGPSL GSSGPQFCASRAYESSRADEL SVPAGARVRLVLETS 266  
 Cf-NOX01 FPAPYLEE---AAP--DREG-TTLRSSGSGFCASQAYESSHADEL SVPAGARVRLVLETS 262  
 Mm-NOX01 FPAPYLEE---VATCQQESGLALQGSGRQFCTTQAYEGSRDEL SVPSGARVRLVLETS 265  
 Rn-NOX01 FPAPYLEE---IATGQQESGMAVQGSGRQFCATQAYEGSRDEL SVPSGARVRLVLETS 270

\* \*\* \* \*\* \* \*

Hs-p47phox **DGWWVIRKDDVTGYFPSMYLQKSGQ** 285  
 Cf-p47phox DGWWVVRKDDITGYFPSMYLQKSGQ 285  
 Mm-p47phox DGWWVVRKGDITGYFPSMYLQKAGE 285  
 Rn-p47phox DGWWVVRKGDITGYFPSMYLQKAGE 285  
 Gg-p47phox DGWWVIRKDETTGYFPSMYLQKSGE 285  
 Xt-p47phox DGWWVVRKGSITGYFPAMYLQKSGE 287  
 Tn-p47phox DGWWVVRKGEFTGYFPSMFLQKASK 287

|                    |                            |     |
|--------------------|----------------------------|-----|
| Tr-p47 <i>phox</i> | DGWWWVRKGEQMGYFPSMFLQKANK  | 289 |
| O1-p47 <i>phox</i> | DGWWWVRKGETGHFPSMFLTKASK   | 286 |
| Dr-p47 <i>phox</i> | DGWWWVRKGEETGFYPSMFLCRTGE  | 287 |
| Ci-p47 <i>phox</i> | EGWWLARYNSNEGWPVGSYLEKSRR  | 284 |
| Sp-p47 <i>phox</i> | DGWWKVSQGGKQGWAPATFLQIYKG  | 283 |
| Dr-NOX01           | NGWWIVRYNRKAGYVPSMYLQPHNN  | 291 |
| O1-NOX01           | DGWWLIRFNGKVGYPAMYLPYNN    | 293 |
| Tn-NOX01           | SGWWLIRYQGGKVGYPVTLCLQPYNR | 282 |
| Gg-NOX01           | NGWWLIRYNGRKGYPMSMCLQAYKN  | 272 |
| Xt-NOX01           | NGWWLIR-----               | 246 |
| Hs-NOX01           | RGWWLCRYGDRAGLLPAVLLRPEGL  | 291 |
| Cf-NOX01           | RGWWLCRFRGRSGLLPAVLLQPEGL  | 287 |
| Mm-NOX01           | RGWWLCRYNGRTGLLPAMSLQPEGL  | 290 |
| Rn-NOX01           | RGWWLCRYNGQTGLLPVLLQPEGL   | 295 |

\*\*\* \* \* \* \*

**TPR and activation domains of Nox Activators (vertebrate p67*phox*, vertebrate NOXA1, *C. intestinalis* and *S. purpuratus* p67*phox*-like proteins, Dd-p67-like, and fungal NOXR).**

Gray boxes indicate the amino acid residues corresponding to the tetratricopeptide repeat (TPR, residues 6-153), activation domain (AD, 196-210 residues) of human p67*phox*.

|                    | TPR region                                                     |    |
|--------------------|----------------------------------------------------------------|----|
| Hs-p67 <i>phox</i> | ---MSLVEAISLWNEGVLAAADKKDWKGALEAFSAVQDPHSRRCFNIGCMYTIILKNMTEAE | 57 |
| Cf-p67 <i>phox</i> | ---MSLAEAIISLWNEGVLAAADKKDWKGALEAFSAVQDPHSRRCFNIGCMHTILGNMPEAE | 57 |
| Mm-p67 <i>phox</i> | ---MSLAEAIRLWNEGVLAAADKKDWKGALEAFSEVQDPHSRRCFNIGCVNTILENLQAAE  | 57 |
| Rn-p67 <i>phox</i> | ---MSLAEAIRLWNEGVAADKKDWKGALEAFSEVQDPHSRRCFNIGCMYTIILDNLQEA    | 57 |
| Gg-p67 <i>phox</i> | ---MSLVEIIRLWQEGVCAADGKEWGAALKAFSTAVQNPAPAKICFNIGCETHLVGLQEA   | 57 |
| Xt-p67 <i>phox</i> | ---MALVEIMRLWSEGVAADGKEWGAALKAFSTAVQNPAPAKICFNIGCETHLVGLQEA    | 57 |
| Tn-p67 <i>phox</i> | ---MSFLDTLRQWDNACTVADGQDFSEALRILLAIPEPNSKICFNIGCETHLVGLQEA     | 57 |
| Tr-p67 <i>phox</i> | ---MSFLDTLRQWDKASTVADRQEFSEALRILLAIPEPNSKICFNIGCETHLVGLQEA     | 57 |
| O1-p67 <i>phox</i> | ---MSFVDTLRQWDDGVTADKQDFSEALRILLAIPEPNSKICFNIGCETHLVGLQEA      | 57 |
| Dr-p67 <i>phox</i> | ---MSFVDTLRQWDEAVACVEQRDPDAALRIFLSIEEKNSKIAFNIGCETHLVGLQEA     | 57 |
| Hs-NOXA1           | ---MASLGDVLRVWHLGAQAVDRGDWARALHLFSGVPAPPARLFCFNAGCVHLLAGDPEAAL | 58 |
| Cf-NOXA1           | ---MPSLGDVLRVWHLGAQAVDRGDWARALHLFSGVPAPPARLFCFNAGCVHLLAGDPEAAL | 58 |
| Mm-NOXA1           | ---MSSLGDQIRDWHRGVLAVAREWDSALCFFSDVREPLARMYFNRGCVHLMAGDPEAAL   | 58 |
| Rn-NOXA1           | ---MSSLGDQIRDWHRGVLAVAREWDSALCFFSDVREPLAKMYFNRGCVHLMAGDPEAAL   | 58 |
| Gg-NOXA1           | ---MAYRELLRRWHQAALADGGDWAALLETLCGIEEPPARICFNIGCMHLAGRRLDAL     | 57 |
| Dr-NOXA1           | ---MLYIELIRLWDEAVKAIIDIRWQGALSCLNQTIDHNCRTMFVASTHIALGQVDLAI    | 57 |
| O1-NOXA1           | ---MLYAECLKLWDESVQAMDSRDWQGALEKLLQIQEPTSRILFNAATAHLALGHLDMAL   | 57 |

Xt-NOXA1 ---MHYKEVRRWHEGVVAEGKDYDAALRSFTAIEDPPSRIWFNVGGIYLLRGDLPRAL 57  
 Ci-p67phox ---MASKHAALLQQEGVEASEENDWFKALSIFQQVNPSSVIWFNIGCCHLQVQQYLKAE 57  
 Sp-p67phox-N MDKQTHKDI IQVWHEGVQTFDKGNVDAALQAFLGIGDPSAKILFNIGHLEMSQYRFGE 60  
 Sp-p67phox-C ---MTHKDTIATWYEGVLAFERGESSEALNQLNSIVDPSAKILYNIGILQKSLGQLEDAN 316  
 Fg-NOXR ---MSLKQEIETWVAALGRYDNNEFEEALNEFGKIGD-TSKILFNMGVTHATLGEHEKAV 56  
 An-NOXR ---MSLKQEIETWVALEHFDNQEYDLALRSFAAIAD-TSKILFNCVGIYATLGEHEKAV 56  
 Mg-NOXR ---MSLKAELETWAAALKAYDEEDFEKSLDLFSRIAD-SSKILTNIGLIYATLGEHEAAV 56  
 Dd-p67-like ----MLKQTIKKWNQSIERYESGNVGEALTILTSIEQSTSKINYNIGVMYIKSNFRNAI 56

\*\* \* \*

Hs-p67phox **KAFTRSINRDKHLAVAYFQRGMLYYQTEKYDLAIKDLKEALIQLRGNQLIDYKILGLQFK** 117  
 Cf-p67phox KAFTRSINRDKHLAVAYFQRGMLYYHMEKYDAAIKDLKEALTQLRGNQLIDYKILGLQFK 117  
 Mm-p67phox QAFTKSINRDKHSAVAYFQRGMLYYRMEKYDLAIKDLKEALTQLRGNQLIDYKILGLQFK 117  
 Rn-p67phox QAFTKSINRDKHLAVAYFQRGMLYYSMKEYLLCVYCLREALVTFRKKQVLSPKPEGLQFL 117  
 Gg-p67phox EAFTQISCDKHLAVAYFQRGTVFYKRHNHEMALKDFKEALQLRGNQLIDYKILGLRGR 117  
 Xt-p67phox KAFTLTIERDMHLAVGYFQRGFVFFQRGKYSALQDWTRAYTEMRGNQLIDYKILGLIFK 117  
 Tn-p67phox KAFDSSISKDEHLAVAFFQRAITFYKMSRQTHRPCHFQQTFKELRGNQLIDYGALGLRYK 117  
 Tr-p67phox KAFDSSICKDEHLAVAFFQRAITFYKMTRQEYSLADFQQTLELRLGNQLIDYGALGLRYK 117  
 Ol-p67phox KAFDCSIRKDEHLAVAFFQRGITFYKMRYEESIGDFQRAFKTLRGNQLIDYKALGLRYI 117  
 Dr-p67phox KAFDGSIGKDEHLAVAFFQRGVTFYKKEKFEESLDFQQAQFQLRGNQLIDYTPLGLRYK 117  
 Hs-NOXA1 RAFDQAVTKDTCMAVGFFQRGVANFQLARFQEALSDFWLALQLRGHAAIDYTQLGLRFB 118  
 Cf-NOXA1 RAFDQAVTKDTCMAVGFFQRGVANFQLERFQEALSDFRLALQLRGNAAIDYTQLGLRFB 118  
 Mm-NOXA1 RAFDQAVTKDTCMAVGFLQRGVANFQLQRFQEAVSDFQLALQLRDNAVIDYTQLGLNFB 118  
 Rn-NOXA1 RAFDQAVTKDTCMAVGFLQRGVANFQLQRLQEAVSDFQLALQLRGNAAIDYTQLGLDFK 118  
 Gg-NOXA1 RAFDETVMKDNSLAVGYFQRGFVCLQLEMYEEALS DYHMAFSLRKNPFI DYKQLGLRHI 117  
 Dr-NOXA1 KALDRVIAKDSLAVGFFQRGSVAVHMMANRLEEALSDCIWAQKYMRENPI DYKQLGLRYK 117  
 Ol-NOXA1 KCLDLTISKDEHLAVGFFQRAAVNMQLERLEDALSDCIWAQKHMKNTPV IDYKQLGLRFB 117  
 Xt-NOXA1 EAYDKSLAQDPCLAVGYFQRYGLQFKLGRYKALSCHLALSNLRNNSFI DYKQLGLRHV 117  
 Ci-p67phox NAFSQAIAKDKYLAVGYFQLAVSQTHLGNVYAEIDNFSSALSSLRGNPFI DYKQLNMLCK 117  
 Sp-p67phox-N VNFTAAVEKDPHMAHAHFQGMVYFHLHRYNESRNSYKAKVCLRGNRFIDYRQLGFVHK 120  
 Sp-p67phox-C SILKEVVSRRPHLAIGHFQSGVVLGGLGRGDDAWHAFEKARETLRG-KMINYKPLGLQYK 375  
 Fg-NOXR ESYQRAIRLDQYLAVAYFQQGVSNFLGDFEELANFNNTLLYLGRNAMIDYQALGLLFB 116  
 An-NOXR EYQAGVGLDQYLAIAFYQEGVSNFLGDFEELANFNNTLLYLGRNTYIDYEQALGLKFR 116  
 Mg-NOXR QRFIEATNFDQYLAVAYFQCGVSNFLARYELAYKDFEELLYLRGNQAINYEQLGLKFR 116  
 Dd-p67-like EYFNRSVEQDKYLASSYMRVIAAHMNGELNHAIVDYDETI SKLRGHEYIDYKQLGLDHK 116

\* \* \* \* \* \* \*\*

Hs-p67phox **LFACEVLYNIAFMYAKKEE-WKAEELALATSMKSEPRH-SKIDKAMECVWKQ**----- 169  
 Cf-p67phox LFACEVLYNIAFMYAKNEE-WKAEHLALAMSMKSEPRH-TKIDKAMECVWKQ----- 169  
 Mm-p67phox LFACEVLYNIALMHAKKEE-WKAEELALATNMKSEPRH-SKIDKAMESIWKQ----- 169  
 Rn-p67phox LQRSPVLYNIALMHAKKEE-WKAEELALATNMKSEPRH-SKIDKAMESIWVS----- 169  
 Gg-p67phox LFACEILYNIALVYATMEN-WKAEHLTLAMSSKSEPH-NKIDRAMEAILKQ----- 169  
 Xt-p67phox LYSCEILHNIALTHAKEGK-WAKAEESILLALSQKVELRHNTKLEKAMEDILKE----- 170  
 Tn-p67phox LTACEVLHNMALAEALGR-WEKAQESLVKALDYSSDSKL-GAIDKALQATLQK----- 169  
 Tr-p67phox LNACEVLHNLALTEAQMGH-WEKAQESLVKALDYRTESKL-GIIDNALQATLQK----- 169  
 Ol-p67phox LYACEVLHNMALAEALGN-WEKAQENLRKALDYKTDACL-SVIEKAQQAVLKE----- 169  
 Dr-p67phox LYACEVLHNLGLAQAQLGK-WEKAQENLLTALSLRADAKF-SHIDHALDAILKH----- 169  
 Hs-NOXA1 LQAWEVLNVAQAQQLGL-WTEAASSLREAMSKWPEGSL-NGLDSALDQVQRR----- 170  
 Cf-NOXA1 LKTWEVLFNVGAAQCALGL-WAEAGSLEEALCKGPEGAG-EDLHAALAQVQKQ----- 170  
 Mm-NOXA1 LQAWEVLYNMAQAQAGL-WTKAANTLVEAISKWPEGAQ-DILDIAQVQKQ----- 170  
 rat-NOXA1 LQAWEVLYNMAVQQAQAGL-WTKAANTLVEAISKRPEGAQ-DTLEAAMDQVQKQ----- 170  
 Gg-NOXA1 LYAWEVLYSTAATQCRLQQ-WQEARDTLEKAVVWRPEGRS-ATLALALERVQNH----- 169

|              |                                                               |     |
|--------------|---------------------------------------------------------------|-----|
| Dr-NOXA1     | LYSWQVLYNAAA VHSRLQQ-WDKARDILLAASQERGAGRS-NLIDTALEAISRK-----  | 169 |
| O1-NOXA1     | LYSWQVLYNAAAAYCRMGG-WEQATEVLLQGG---GAG----HLEAALDSIERR-----   | 163 |
| Xt-NOXA1     | LFSWEAQYNMAAVLCSLGR-WESAEEKLKETLQ--GDGRN-AKLDWALDQVQRR-----   | 167 |
| Ci-p67phox   | ISACDIRLNLALLHIFSGD-VPKAREILNEAMSPHDEDKMKNCKSALDALVNENWVYFG   | 176 |
| Sp-p67phox-N | LYECEVLNLYALTYATMMNNSEYALELLEDEAKKVSVEARHGPLIEKAQKRLLLY-----  | 174 |
| Sp-p67phox-C | LHKCEVLHNQAWAYN-ELDQRDWARNQLEEARECKADPRHE--KIEDSYRAFTSGRSFK-  | 431 |
| Fg-NOXR      | LYSCEVLNRLGLCYIYLQQ-MDAGMQDFSYAVKEKVVEDHNVIDDAINEQAEGYT-----  | 170 |
| An-NOXR      | LYSCEVLNRLGLCYIYLQQ-IGPGMQDLEYASKEKYSRSR-----LTPQGYT-----     | 162 |
| Mg-NOXR      | LFSAEVLNKLGLAQIYMGR-AQEGGLADMEEARREKATDEHNVIDDAIQERGEGYT----- | 170 |
| Dd-p67-like  | LLLAEVLNKLALGRAGS--SVALQATQCFSQPSDSQEFKNQCKKIQDGSQLN-----     | 168 |
|              | *           *                                                 |     |

AD

|              |                                                        |     |
|--------------|--------------------------------------------------------|-----|
| Hs-p67phox   | --KLYE-PVVIPVGKLFPRNERQVAQLAKKDYLGKATVVASVVDQD-----    | 212 |
| Cf-p67phox   | --KLYE-PVVIPMGRLFRPNERQVAQLAKKDYLGKATVVASVVDQD-----    | 212 |
| Mm-p67phox   | --KLFE-PVVIPVGRLFRPNERQVAQLAKKDYLGKATVVASVVDQD-----    | 212 |
| Rn-p67phox   | --VVVDGPCCLAQYHVQRASHKQVPVLS-KDLLGEETVVASVVDQD-----    | 212 |
| Gg-p67phox   | --KLYE-PVAIPTGKLFPRNEKQVAQLEKDYLGKAMVVASVVDKD-----     | 212 |
| Xt-p67phox   | --KVFA-AVKIPKGRIFQPNRERLVEQLEKDYLGKALVVASVVDKD-----    | 213 |
| Tn-p67phox   | --KLFK-LTGFPSKVLFPKNRYVAELEKDYLGKAKVVASVVPQD-----      | 212 |
| Tr-p67phox   | --KLFK-LIGFPSKVLFPKNHYVAELEKDYLGKAKVVASVVPQD-----      | 212 |
| O1-p67phox   | --KLFK-LVEFPSKMMFKPNKHYVAELEKDYLGKAKVVASVNPQD-----     | 212 |
| Dr-p67phox   | --KLFK-LVEVRAGLLFKPNKHYVAELEKDYLGKAKVVASVVPAD-----     | 212 |
| Hs-NOXA1     | --GSLP-PRQVPRGEVFRPHRHLKHELPVDFLGKAKVVASAIPDD-----     | 213 |
| Cf-NOXA1     | --ATLQ-LRQVPRGEVFRPHRRHVEHLEPVDLFGKAKVVASAIPDD-----    | 213 |
| Mm-NOXA1     | --VPLQ-LQQVPKGEVFPVPRRYLKHLEPMDFLGKAKVVASVIPDD-----    | 213 |
| Rn-NOXA1     | --VPLQ-LRQVPKGEVFPVPRRYLKHLEPMDFLGKAKVVASVIPDD-----    | 213 |
| Gg-NOXA1     | --QFLE-PMQVPPGEFFRPRKKEVEQLDSKDFLGKPKVISSIPND-----     | 212 |
| Dr-NOXA1     | --DVLE-PLLLPEGEVFRPRKLEVDQLKPRDFLGEAKVITSMIPND-----    | 212 |
| O1-NOXA1     | --ELPT-PLTVPELVFRPRKQVEVEQLKQKDFLGKAKVISSIPND-----     | 206 |
| Xt-NOXA1     | --SLLQ-PMSVPEGEFFRPRKQVEVEQLNSVDFLGKPTVISSVVPND-----   | 210 |
| Ci-p67phox   | ESALERLVRLSSSCLFRPSKTKMEGLKSGTKFMNTATVVSATNDEY-----    | 222 |
| Sp-p67phox-N | -----EPVVLPSNQLFRPPKSKVGLKNVDYLGKPKVSELPESS-----       | 214 |
| Sp-p67phox-C | -----LYELPKPLLFKPPKSKIDNDR-KDYLGKAKIVAKLPTVR-----      | 470 |
| Fg-NOXR      | -----VFSIPVGVVYRPNKAVRNKTKDYLGKARLVAASDRAN-----        | 209 |
| An-NOXR      | -----VFSIPVGVVYRPNKAVRNKTKDYLGKSRVIAANRLSTPAD-----     | 204 |
| Mg-NOXR      | -----VFSIPVGVLYRPESEKLNKSMQKDYMGKAKLVAASDPNDIFT-----   | 212 |
| Dd-p67-like  | -----FSTRPIPLSLLFKPPK--VSDAPQKQRSATTSSIQSSSPSTPMSSSPSY | 216 |
|              | *           *           *                              |     |

**The N-terminal SH3 domain of Nox Activators (vertebrate p67phox)**

The amino acid sequences corresponding to the N-terminal SH3 (SH3-A) domain (residues 240-299) of human p67phox were aligned.

|            |                                                               |     |
|------------|---------------------------------------------------------------|-----|
| Hs-p67phox | LEGEAHRVLFVGFVPETKEELQVMPGNIVFVLKKGNDNWATVMFNGQKGLVPCNYLEPVEL | 299 |
| Cf-p67phox | LEGEAHRVLFVGFVPETPEELQVMPGNIVFVLKKGNDNWATVMFNGQKGLVPCNYLEPVEL | 299 |

|                    |                                                                 |     |
|--------------------|-----------------------------------------------------------------|-----|
| Rn-p67 <i>phox</i> | LEGEAHRVLFQFVPEPEELQVMPGNIVFVFLKKGSDNWATVMFNGQKGLVPCNYLEPVEL    | 299 |
| Mm-p67 <i>phox</i> | LEGEAHRVLFQFVPEPEELQVMPGNIVFVFLKKGSDNWATVMFNGQKGLVPCNYLEPVEL    | 299 |
| Gg-p67 <i>phox</i> | LEGQPHRVLYEYFIPETAEEELQVLPGNIVFVFLKKEKDNWATVMFNGKGI VPCNFLEPMEL | 299 |
| Xt-p67 <i>phox</i> | LQGEPHRVLFQFNPETAEEELQVLPGNIVFVFLKKGDDNWATVVFNGKGI VPCNYLEPVEL  | 300 |
| Tr-p67 <i>phox</i> | LEGEPTHVLYKQFVPETSDELAVVPGNVVFLVQKGDNDWASVVFNEERRGLVPYNYLERLEI  | 300 |
| Tn-p67 <i>phox</i> | LEGEPTHVLYEYFVPETSDELAVVPGNVVFLVQKGDNDWASVVFNEERRGLVPYNYLERLEI  | 306 |
| Dr-p67 <i>phox</i> | LEGEPTHVLYEYFVPETKEELAVLPGNIVFVFLHRGTDNDWASVVFNEKRGLVPYNFLEPLDI | 299 |
| Ol-p67 <i>phox</i> | LEGEPTHVLFQFVPETCDELAVKPGNMVFLVQKGDNDWAYVIFNGRTGLVPYNYLERQEI    | 299 |

\* \* \* \* \*

**PB1 domain of Nox Activators (vertebrate p67*phox*, vertebrate NOXA1, fungal NOXR and Dd-p67-like).**

The amino acid residues corresponding to the Phox/Bem1 (PB1) domain (residues 352-429) of human p67*phox* were aligned. *Red* and *blue* letters indicate the amino acid residues corresponding to the positions of two basic amino acid residues (K355 and K382) of PB1 domains of human p67*phox* and four acidic amino acid residues (D289, D291, D293 and D302) of OPCA motif of human p40*phox* PB1 domain, respectively.

|                    |                                                                                                             |     |
|--------------------|-------------------------------------------------------------------------------------------------------------|-----|
| Hs-p67 <i>phox</i> | --YTLK <b>V</b> HY---KYTVVMTQPGLPYSQVRDMVSK <b>K</b> LELRL <b>E</b> HTKLSYRPR <b>D</b> SN-EL-VPLS           | 406 |
| Cf-p67 <i>phox</i> | --YTV <b>K</b> VHY---KYTVVMEIQAGLPYSQRLRDMVAK <b>K</b> LELLPEHTKLSYRPP <b>D</b> SH-EL-EPLS                  | 408 |
| Rn-p67 <i>phox</i> | --YML <b>K</b> VHY---KYTVVMTQLGLPYSQRLRDMVSK <b>K</b> LELLPEHTKLSYQRR <b>D</b> SP-EL-LLLS                   | 406 |
| Mm-p67 <i>phox</i> | --YML <b>K</b> VHY---KYTVVMETRLGLPYSQRLRDMVSK <b>K</b> LALSPEHTKLSYRRR <b>D</b> SH-EL-LLLS                  | 405 |
| Gg-p67 <i>phox</i> | --YVL <b>K</b> VHY---KYTVAMQVKPDLSEKLLGLVCD <b>K</b> LELQPEHTMLRYKSAASG-EL-VPLS                             | 408 |
| Xt-p67 <i>phox</i> | --YLV <b>K</b> VY---KYTVAIQISSKLPFADLLTLISS <b>K</b> LQLLPSRMKLSFK-- <b>E</b> D <b>Q</b> - <b>D</b> D-VLLN  | 402 |
| Tr-p67 <i>phox</i> | --CV <b>V</b> KVRY---TFTFAVLVPRGSSYATLAEKISE <b>K</b> LSVPANAI VLSLSSEATE-QN-VIDG                           | 404 |
| Tn-p67 <i>phox</i> | --YVV <b>K</b> VRF---TFTFAVIVPRGSSYATLAQKVGE <b>K</b> LSVPADAVILSLSEAAE- <b>E</b> D-VING                    | 411 |
| Dr-p67 <i>phox</i> | --CV <b>V</b> KVHF---QFTIAIAIAHQGPYGVILQMISS <b>K</b> LKLPASTLTTRYAKEGSA-ER-VIIE                            | 411 |
| Ol-p67 <i>phox</i> | --YIV <b>K</b> VHF---TFTFAVSI PRESSYEVLRKISK <b>V</b> KLPSDNISLSFSLDSSG-QR-AIDA                             | 396 |
| Hs-NOXA1           | --VTVT <b>V</b> QC---AFTVALRRARGADLSLRALLGQALPHQAQLGQLSYLAPGED-GHWVPI                                       | 369 |
| Cf-NOXA1           | --VTVT <b>V</b> QC---AFTLALKVPWGAGLPHRLTLLSQALPLQAQHGQLSYR <b>D</b> PSHE-ARWVALP                            | 347 |
| Rn-NOXA1           | --VTVT <b>V</b> QC---HFTVPLKVPRTGLSSFRLLSQALLQQTQKGQFSYKARGED-RAWVPIS                                       | 339 |
| Mm-NOXA1           | --VTVT <b>V</b> QC---HFTVPLKVPRTGLSSFRLLSQALLHQTQTGQLSYKAPGEE-RSWIPIS                                       | 341 |
| Gg-NOXA1           | RPAVL <b>R</b> VRC---ECTVVVRAGEVPSVPALRALLRER <b>F</b> GQAERGRLSYRH <b>L</b> DGK--ELGAVS                    | 410 |
| Xt-NOXA1           | --LVLSVHA---EFTVNMTVSKAITYPELQCALREELRKHGEMANHLSYR <b>D</b> PESRGLTPVT                                      | 489 |
| Dr-NOXA1           | --VV <b>V</b> KVHY---TYTVALRPAETPFRLDQEKIA <b>Q</b> KLGGPAMNIRLRHRRPGTR-VL-TPLN                             | 400 |
| Ol-NOXA1           | --VV <b>V</b> KVHY---TYTVAVTPLNTPYHELKQRI <b>A</b> Q <b>K</b> LGHPA SELCLRHKQGGSH-LL-SPLS                   | 416 |
| An-NOXR            | --RR <b>F</b> R <b>V</b> KVHSFEDTRYILIPPTIEFAEFETRIRE <b>K</b> FGFQMA-LKIKM <b>Q</b> DE---GDMITMV           | 481 |
| Fg-NOXR            | --TKI <b>R</b> VK <b>V</b> HA---DEVKLIMITPDTRFETLSDKVRD <b>K</b> FNKR--FKIK <b>V</b> K <b>D</b> DDMPNGDMITV | 486 |

Mg-NOXR --TLIRVKLHYQDDTRGMLTPDTPFADFMDKVTA~~K~~FGKQINGLGLKFK~~DE~~D---GGKVTLR 515  
Dd-p67-like --ITL~~K~~VFYK---DRRLIQIPVPCNLSTFIQKIEL~~K~~FEITISDKFSLSFQ~~L~~D---GEENEIN 363

Hs-p67phox -EDSMKDAWGQV-----KNYCLTLWCENT--- 429  
Cf-p67phox -EDNMKAAWGQV-----RNYCLTLWCENT--- 431  
Rn-p67phox -EESMKDAWAQV-----KNYCLTLWCEHT--- 429  
Mm-p67phox -EESMKDAWGQV-----KNYCLTLWCEHT--- 428  
Gg-p67phox -AQNLEEAWSHS-----KDQCLTVWCDCCT--- 431  
Xt-p67phox -EENTEKAWSLA-----TDNCLKCLKCT----- 423  
Tr-p67phox -G~~T~~DMEGVWSRV-----SGRCITLWCR----- 425  
Tn-p67phox -S~~T~~DMEAVWGRA-----SGRCITLWCR----- 432  
Dr-p67phox -DSEMEAVWNSA-----KDGRITLWCS----- 432  
Ol-p67phox -NTDMETVWSQV-----RAGRITLWCKEK--- 419  
Hs-NOXA1 EEESLQRAWQDA-----AACPRGLQLQ----- 391  
Cf-NOXA1 GEEALQGAWRDT-----AASPRGLQLQ----- 369  
Rn-NOXA1 TEDSLQSVWRNV-----PVSPRGLQLQ----- 363  
Mm-NOXA1 TEESLQSIWRNV-----PVGPGGLQLQ----- 361  
Gg-NOXA1 GEE~~D~~LEKMWQQL-----TDGRITLCCQ----- 432  
Xt-NOXA1 GSK~~D~~WQEVKLKLS-----RANQVTLCK----- 511  
Dr-NOXA1 GDDGLDCLEGVA-----ESGRAQIWCQ----- 422  
Ol-NOXA1 GEPG-GTVQDLA-----VAGRATLWCQRF--- 439  
An-NOXR DQ~~E~~DLDLLMASREIARREGSEMGMKIWVEERPMI 517  
Fg-NOXR DQ~~D~~DL~~E~~MVIDSVKDEARKQRTETGKMEIWILQL--- 509  
Mg-NOXR DES~~D~~YELAIETARESAK--GKPEGRL~~E~~LWCMDL--- 546  
Dd-p67-like SQVQLDKMICMEINEINVKDIIPSPSPSPSPSP--- 390

**The C-terminal SH3 domain of Nox Activators (vertebrate p67phox, vertebrate NOXA1 and *S. purpuratus* p67phox-like protein).**

The amino acid residues corresponding to the C-terminal SH3 (SH3-B) domain (residues 457-526) of human p67phox were aligned.

Hs-p67phox KKG~~S~~QVEALFSYEATQPEDLEFQEGDIIILVLSKV-----NEEWLEGECKGKVGIF 506  
Cf-p67phox KEGGHVVALFTYEATQPEDLEFQ~~Q~~GDIIQIISMV-----NEDWLEGECKGKIGIF 508  
Rn-p67phox KEGTQVVAIFSYDATQPEDLEFVEGDVILVLSHV-----NEEWLEGECKGKIGIF 506  
Mm-p67phox KEGTQVVAIFSYEAAQPEDLEFVEGDVILVLSHV-----NEEWLEGECKGKVGIF 505  
Xt-p67phox A~~Q~~GKYPIALFEYEATQPEDLPFCKGDIIKILSHV-----SEDWLEGECKG~~R~~MGIF 493  
Gg-p67phox ---TQVVAQYSYEATQPEDLEFQAGDVILVLSKV-----NEDWLEGCNGKIGIF 501  
Tr-p67phox -KESLLALHSYDSSNPEDLSFHQGDRI~~T~~LLSKV-----NQDWLEGEFNGTGIF 483  
Tn-p67phox RRETFLALHTYDSPNPEDLTFQ~~Q~~GDKILLLSKV-----NQDWLEGC~~H~~QNGTGIF 492



|                    |                                                              |      |
|--------------------|--------------------------------------------------------------|------|
| Dr-p67 <i>phox</i> | ---AKVVALYSYESSTPEDLEFKQGNVITVLSKV-----NDEWLEGQCNGKIGIF      | 488  |
| O1-p67 <i>phox</i> | GEETHKVALHSYQSANPEDLNFKEGDEITVLARI-----NQDWLEGRNGSTGIF       | 493  |
| Hs-NOXA1           | PVLYQVVAQHNSYSAQGPEDLGRFGDVTVDLCEE--PDVPL-AVDQAWLEGHCDGRIGIF | 455  |
| Cf-NOXA1           | PVLYQVVAQHNSYSAQGPEDLGRFGDVTVDLCEE--PDVPL-AVDQAWLEGHCDGRIGIF | 436  |
| Rn-NOXA1           | PVLYQVVAQYDYRAQRPELDLFRQGDVTVDLCEV-----DEAWLEGHRDGRVGIF      | 420  |
| Mm-NOXA1           | PVLYQVVAQYNYRAQRPELDLFRQGDVTVDLCEV-----DEAWLEGHRDGCVGIF      | 418  |
| Gg-NOXA1           | PILYRMLAQHSYSAQPGDLEFSKGDVLDILSEV-----NEDWLEGHCNGKTGIF       | 490  |
| Xt-NOXA1           | PVLYRMRQAQYDYLQGPADLSFQQGDLISILSEV-----NGEWLEGHCHRGIGIF      | 569  |
| Dr-NOXA1           | TILYQMVALYDYNAQGPEDLEFSEGDTIDILSEV-----NEEWLEGHVAGNIGIF      | 480  |
| O1-NOXA1           | HILYQMVALYNYDAQGPEDLEFSEGDTIDILSEV-----NEEWLEGHCAGNVGIF      | 514  |
| Sp-67 <i>phox</i>  | GQRKTALVIASHETDVEGEVSVSEGDILITITGEV-----GDWLEVEVKGRKGRV      | 1094 |
|                    | * * * * *                                                    |      |

|                    |                              |      |
|--------------------|------------------------------|------|
| Hs-p67 <i>phox</i> | PKVFVEDCATTDLESTRREV-----    | 526  |
| Cf-p67 <i>phox</i> | PKAFVEEHATTDLESSPRGV-----    | 528  |
| Rn-p67 <i>phox</i> | PKAFVEGCAAKNLEGTPREV-----    | 526  |
| Mm-p67 <i>phox</i> | PKAFVEGCAAKNLEGIPREV-----    | 525  |
| Gg-p67 <i>phox</i> | PSAFVRDGNTKDP-----           | 518  |
| Xt-p67 <i>phox</i> | PKVFTEE-----                 | 500  |
| Tr-p67 <i>phox</i> | PAAFVEEVPANG-----            | 495  |
| Tn-p67 <i>phox</i> | PAAFVEEVSVE-----             | 504  |
| Dr-p67 <i>phox</i> | PSSFVEPLNGDPH-----           | 501  |
| O1-p67 <i>phox</i> | PASFVNFCSPRQL-----           | 505  |
| Hs-NOXA1           | PKCFVVPAGPRMSGAPGRLPRSQQGDQP | 483  |
| Cf-NOXA1           | PKCFVVPAG-----               | 445  |
| Rn-NOXA1           | PKCFVVPAATCVEALP--VPEPQPGEQH | 446  |
| Mm-NOXA1           | PKCFVVPAGAYVEAML--VLGPQPGDQN | 444  |
| Gg-NOXA1           | PKCFATQTSAAFP-----           | 504  |
| Xt-NOXA1           | PKCFAQR-AEGI-----            | 580  |
| Dr-NOXA1           | PQSFAHRDTSISGASTD-----       | 498  |
| O1-NOXA1           | PSCFAYRENSSLYP-----          | 528  |
| Sp-67 <i>phox</i>  | PRSCVKDFSKPRV-----           | 1106 |
|                    | *                            |      |

## PX domain of p40*phox* (vertebrate p40*phox*).

The amino acid sequences corresponding to the PX domain (residues 19-140 of human p40*phox*) were aligned.

|                    |                                                               |    |
|--------------------|---------------------------------------------------------------|----|
| Hs-p40 <i>phox</i> | DVAISANIADIEEKRGFTSHFVFVIEVKTGGGSKYLIYRRYRQFHALQSKLEERFGPDSK  | 78 |
| Cf-p40 <i>phox</i> | NIAISANIADIEEKRGFTSYFVFVIEVKTGGGSKYLIYRRYRQFHALQSKLEERFGPENK  | 78 |
| Mm-p40 <i>phox</i> | DVAISANIADIEEKRGFTSHFVFVIEVKTGGGSKYLIYRRYRQFYALQSKLEERFGPESK  | 78 |
| Rn-p40 <i>phox</i> | DVAISANIADIEEKRGFTSHFVFVIEVKTGGGSKYLIYRRYRQFYALQSKLEERFGPESK  | 78 |
| Gg-p40 <i>phox</i> | DVPVSANIADIEEKKGFTNYYMFVIEVKIKSGGRYLIFRRYREFYALHTKLEERYGGESK  | 78 |
| Xt-p40 <i>phox</i> | DVPVFAHIADVEERRGFSLYYTFVIEVKTGGGSKYFIYRRYSQFFTLHAKLEENYGP--D  | 76 |
| Tr-p40 <i>phox</i> | NVAVTATIADIEEKKGFIDHYRFVIEVKTGGGSKYFIYRRYREFFTLHQTLKESKYSPEES | 77 |
| Tn-p40 <i>phox</i> | NVPVTATIADIEEKKGFIDHYRFVIEVKTGGGSKYFIYRRYREFFTLHQNLKESKYPEDA  | 68 |

|            |                                                                      |     |
|------------|----------------------------------------------------------------------|-----|
| O1-p40phox | NIPVSATIADTEEKRGFIDYFRFVIEVKTKGGSKYLIYRRYKEFFNLHQTLQLEAKYSPGDL       | 78  |
| Dr-p40phox | NIPVTATIADIEEKKGFIVYFSFVIEVKTEGNSKYLIYRRYREFFALHQSELEKYTAEAQ         | 78  |
|            | * ** * * * * * * * * * * * * * * * * * * * * * * * * * * * * * * * * |     |
|            |                                                                      |     |
| Hs-p40phox | S--SALACTLPTLPAKVYVGVKQEI AEMRIPALNAYMK-----                         | 114 |
| Cf-p40phox | S--NPFTCSLPTLPAKVYVGVKQEI AEMRIPALNAYMK-----                         | 114 |
| Mm-p40phox | N--SPFTCNLPTLPAKVYMGAKQEI AETRIPALNAYMK-----                         | 114 |
| Rn-p40phox | N--SPFTCSLPTLPAKVYMGVQKQEI AETRIPALNAYMK-----                        | 114 |
| Gg-p40phox | N--SAFTCTLPVLPQKIVYVGVKQEI AENRIPILNIYMK-----                        | 114 |
| Xt-p40phox | NGIAPYICTLPELPPKIFVGNKQEI AETRIPLLNGYMK-----                         | 114 |
| Tr-p40phox | DRQGQNTCLPPLPGKIVLGNKQEI AEGRIPELNTYMK-----                          | 115 |
| Tn-p40phox | EKPGPNTCLPPLPGKIFVGNKQEI AEGRIPELNTYMKVISAGWALRMDGCRMARSDSPT         | 128 |
| O1-p40phox | ERPGPNTCVLPSLPGKIYVGNKQEI AESRIPELNTYMK-----                         | 116 |
| Dr-p40phox | S--GYNCQLPTLPGKIVFMGNKQEI AESRIPELNMYMK-----                         | 114 |
|            | * * * * * * * * * * * * * * * * * * * * * * * * * * * * * * * * *    |     |
|            |                                                                      |     |
| Hs-p40phox | -----SLLSLPVWVLMDEDVRIFFYQSPYDS                                      | 140 |
| Cf-p40phox | -----SLLSLPIWVLMDEDVRIFFYQSPYDS                                      | 140 |
| Mm-p40phox | -----NLLSLPVCVLMDDVRIFFYQSAYDA                                       | 140 |
| Rn-p40phox | -----NLLSLPVCVLMDDVRIFFYQSAYDA                                       | 140 |
| Gg-p40phox | -----NLLCLPVWVLMDEEVRLFFYHSNFDS                                      | 140 |
| Xt-p40phox | -----GLLNSPTWLLDDEDLRMFFYQTLSDS                                      | 140 |
| Tr-p40phox | -----RLLGLPAWFLDDTLRMFFYQTDQDS                                       | 141 |
| Tn-p40phox | TFHQSPPTIPSPRLLGLPVWFLDDTLRMFFYQTDQDS                                | 166 |
| O1-p40phox | -----RLLHLPWVLLDDETLRIFFYQTDSDS                                      | 142 |
| Dr-p40phox | -----RLLCLPTWVLLDDLIQCFSTRLSPTA                                      | 140 |
|            | ** * * * * *                                                         |     |

**Proline (P)-basic, SH3 and PB1 domains of p40phox (vertebrate p40phox).**

The amino acid sequences corresponding to region from proline-basic (P-basic) region to PB1 domain (residues 144-339 of human p40phox) were aligned. *Gray boxes* indicate the amino acid sequences corresponding to the P-basic region (residues 144-158), SH3 domain (residues 170-229), and PB1 domain (residues 237-339) of human p40phox.

|            | P-basic region             | SH3 domain                      |     |
|------------|----------------------------|---------------------------------|-----|
| Hs-p40phox | PQALRRRLRPTRKVKVSPQGNVSDR  | MAAPRAEALFDFGTGNSKLELNFKAGDVI   | 204 |
| Cf-p40phox | PQALRRRLRPTRKVKNESPQDAIFDR | MAAPRAEALFDFGTGNSKLELNFKAGDVI   | 204 |
| Mm-p40phox | PQALRRRLRPTRKIKGVSPQGAIMDR | MEAPRAEALFDFGTGNSKLELSFKAGDVI   | 204 |
| Rn-p40phox | PQALRRRLRPTRKIKGVTPQGPSMDR | MEAPRAEALFDFGTGNSKLELSFKAGDVI   | 204 |
| Gg-p40phox | PRRLRRRLRPTRRVKSISSQLPVLDR | VAAAPRAEALFDFSGTNSKLELSFKKGDLI  | 204 |
| Tr-p40phox | PRALRRRLRPQTRKVKTIKP---    | KMDLFSSPRAEVMFDFRNGNGEELNKKGEVI | 202 |

Tn-p40phox PRALRRLRPQTRKVKTKVP---KMDLFSSPRAEVMFDFRNGKEELNLKKEVIFLLQRVN 227  
 O1-p40phox PRALRRLRPPTRKVKTVPEPQ---KMDLFSSPRAEAMFDFRNGSKAELNLKKEVIFLLRRVN 204  
 Dr-p40phox PRALRRLRPPTRKVKTKVP---KTDLLSAPRAEAVFDFSGSRELSLKAGDVIFLLRRVN 201  
 Xt-p40phox PRALRRLRPQTRKLLKDSQ---PISDVDRPRAEALFDFKGNAPMELNLKCGDLIYLLSWVN 201

\* \* \* \* \* \* \* \* \* \* \* \* \* \* \* \* \* \* \* \* \* \* \* \*

PB1 domain

Hs-p40phox **KDWLEGTVRGATGIFPLSFVKILKDFP**-----EEDD-----**PTNWLRCYIYEDTI** 249  
 Cf-p40phox FFLPQGTVRGATGIFPQSFVKILKDFP-----EEED-----PTNWLRCYIYEDTI 249  
 Mm-p40phox KDWLEGTSGATGIFPGSFVKILKDFP-----EDED-----TTNWLRCYFYEDTG 249  
 Rn-p40phox KDWLEVRQRGRAEVSSTLVFPLGAST-----EPG-----HRNHIGCPMALEA 248  
 Gg-p40phox KDWLEGTVNDATGIFPSAFVKI IKDLP-----QQED-----TVNKIRCYYDET V 249  
 Tr-p40phox ADWLEGTVNNQGTGIFPQSFVKI IKPLPDSNTEGEGEG-----HTYSLRCFLLTPSG 254  
 Tn-p40phox ADWLEGTVNNQGTGIFPQSFVKI IKPLPDVSAEGEDEG-----HTYSLRCFLLSPAG 279  
 O1-p40phox ADWLEGTVNNQGTGIFPESYVKI IKALPESDSESNGGG-----HTYSLRCFLLTPSG 256  
 Dr-p40phox NADWLEGTVRDRGTGIFPESFVKI IKALPENESDEEGGASRNSRAQGSYSCLHCYFLQPEG 261  
 Xt-p40phox REWLEGTVGNRTGIFPASFVRI IKNLPELLYQ-----VSLLRICYFHDHDR 246

\*

Hs-p40phox **STIKDIAVEEDLSSTPLL-KDLEL**TRREFQREDIALNYRDAEGDLVRLSDEDVALMVR 308  
 Cf-p40phox STTKDIAVEEELSSSTPLF-KDLMQMRREFQREDIALNYRDAQGDLVRLSDEDVGLMVK 308  
 Mm-p40phox KTIKIDIAVEEDLSSTPLF-KDLLALMRREFQREDIALSYQDAEGDLVRLSDEDVGLMVK 308  
 Rn-p40phox TVVTTTVIRGSVDHCPVFWKVLSSMSREFQREDIALNYQDAEGDLVRLSDEDVGLMVK 308  
 Gg-p40phox STIRDISVEENLSSIPLF-KDLMELIKQEFDQHDIVLNYRDLGDGDLIRLLSDQDVLMVS 308  
 Tr-p40phox VDTRDVCVEEELTTQPTY-KDLFHMNRNVFKVNDIALNYRDMEGDLIRVVDDEDIQLMIK 313  
 Tn-p40phox VDTRDVCVEEELTTQPTH-KDLLTLMRNVFKVNDIALNYRDPEGDLIRVLDDEDIQLMVK 338  
 O1-p40phox VETRDVCVEDLSIQPTY-NELLSMRNVFKVEDIALNYRDLEGDLIRILDNEDVQLMIE 315  
 Dr-p40phox IETRDICVEDLSIQPSY-EELLSMRDVFHVDDIALNYRDAEGDLIRILDDEDVVLVQ 320  
 Xt-p40phox CLIRDISLEEDVGKCPYSY-KELLDLIRNQFPDAEVALNMRDKDGELIRLLDNSDMEFLIT 305

\* \* \* \* \* \* \* \* \* \* \* \* \* \* \* \* \* \* \* \* \* \* \* \*

Hs-p40phox **QARGLPSQ**---KRLFPWKLH---ITQKD---NYRVYNTMP----- 339  
 Cf-p40phox QAQGLPSQ---KHLFPWKLH---ITQKD---DYRVYNTVP----- 339  
 Mm-p40phox QARGLPSQ---KRLFPWKLH---VTQKD---NYSVYNTVP----- 339  
 Rn-p40phox QAQGLPSQ---KRLFPWKLH---VTQKD---NYGVYNTVP----- 339  
 Gg-p40phox QSRKRSSE---KHFFPWKLH---ITHKD---DFSVYSTSPGIGDTQTVRAT----- 350  
 Tr-p40phox ESRGQESKIKRPVNQFPWELY---VTLAS---DFSVYNTTEL----- 348  
 Tn-p40phox ESRDQQGKVKRPVNQFPWELHFASVTYSSPTRGDTSAVLSPLTPERRQMVGVLVSVTQR 398  
 O1-p40phox EGKRQKGGKVKRPVNQFSWELH---VTKAF---DLSVYNFEA----- 350  
 Dr-p40phox ESKRTEKVKRPVNQFPWELL---VTHAK---DLTVYNTTEY----- 355  
 Xt-p40phox RGKRPP---RAKNYFPWELH---VTHED---DLEAYKTEA----- 336

\* \* \* \* \*
