# Supplementary material for: Molecular evolution of Phox-related regulatory subunits for NADPH oxidase enzymes
Source: PubMed Central journal article supplement (PMC2121648; doi:10.1186/1471-2148-7-178), 2007-09-27
Supplement: 1471-2148-7-178-S4.pdf [file 1471-2148-7-178-S4.pdf]

#### Additional File 4

### Alignment of full-length p22phox (vertebrate p22phox and *C. intestinalis* p22phox-like protein).

Gray boxes indicate the amino acid sequences corresponding to the polybasic region (basic, residues 55-61), predicted 1<sup>st</sup> and 2<sup>nd</sup> transmembrane segments (TM1-TM2, residues 91-120) and proline-rich region (PRR, residues 151-164) of human p22phox.

Abbreviations: Hs (*H. sapiens*), Cf (*C. familiaris*), Rn (*R. norvegicus*), Mm (*M. musculus*), Gg (*G. gallus*), Xt (*X. tropicalis*), Dr (*D. rerio*), Tr (*T. rubripes*), Tn (*T. nigroviridis*), Ol (*O. latipes*), and Ci (*C. intestinalis*).

|            |                                                             |    |
|------------|-------------------------------------------------------------|----|
| Hs-p22phox | -----MGQIEWAMWANEQALASGLILITGGIVATAG----RFTQWY-FGAYSIVAGVF  | 48 |
| Cf-p22phox | -----MGQIEWAMWANEQALASGLILIMGGIVATAG----QFTKWY-FGAYSIGAGVF  | 48 |
| Mm-p22phox | -----MGQIEWAMWANEQALASGLILITGGIVATAG----RFTQWY-FGAYSIAAGVL  | 48 |
| Rn-p22phox | -----MGQIEWAMWANEQALASGLILITGGIVATAG----RFTQWY-FGAYSIVAGVL  | 48 |
| Xt-p22phox | -----MGQIEWAMWANEQALASGLILLAGGIVAVAG----QFKGWQ-FGAYGVAAGVF  | 48 |
| Tn-p22phox | -----MGKIEWAMWANEQALASGFILLAGGIVGVAG----RFRGWE-FAAYAVAAGVF  | 48 |
| Tr-p22phox | -----MGKIEWAMWANEQALASGFILLTGGVVGAVG----QFRGWQ-FAAYAVAAGVL  | 48 |
| Ol-p22phox | -----MGRIEWAMWANEQALAAGLILLAGGIVGVAG----QFRGWE-FASYAIAAGVF  | 48 |
| Dr-p22phox | -----MAKIEWAMWANEQALAAGLIYLTGGIVGVAG----QFRGWQ-FAAFGIAAGVF  | 48 |
| Ci-p22phox | MPSSSSNIRSIQWGMWANETALLGSYVLTGGIIGIVGGLLNKMFWLP IGIYGVVFGIL | 60 |

\* \* \* \* \* \*\* \* \* \*

|            |        |         |         |         |        |        |        |        |    |           |        |     |
|------------|--------|---------|---------|---------|--------|--------|--------|--------|----|-----------|--------|-----|
|            | basic  |         | TM1-TM2 |         |        |        |        |        |    |           |        |     |
| Hs-p22phox | VCLLEY | PRGKRKK | GSTMERW | GGQKYM  | TAVVKL | FGPFTR | NYYVRA | VLHLLS | V  | PAGFLLAT  | I      | 108 |
| Cf-p22phox | VCLLEY | PRGKRKK | GSTMERC | GGQKYM  | TKVVKV | FGPLSR | NYYIRA | FLHLGL | S  | PAGFLLAT  | I      | 108 |
| Mm-p22phox | ICLLEY | PRGKRKK | GSTMERC | GGQKYL  | TSVVKL | FGPLTR | NYYVRA | ALHFLS | S  | PAGFLLAT  | I      | 108 |
| Rn-p22phox | ICLLEY | PRGKRKK | GSTMERC | GGQKYL  | TAVVKL | FGPLTR | NYYVRA | VLHLLS | V  | PAGFLLAT  | I      | 108 |
| Xt-p22phox | ITLLEY | PRSKRKK | GSTMERC | GGQKYLA | AAVVKL | FGPLTR | NYYVRA | ILHAGL | AV | PGGFILST  | I      | 108 |
| Tn-p22phox | VCLLEY | PRSKRSK | GTSVERP | GGQHCFT | VCVKAF | GPVTK  | NYYVRA | VLHAAI | C  | VPGGFMLAT | V      | 108 |
| Tr-p22phox | VCLLEY | PRSKRSK | GTSVERP | GGQRCFT | VCVKAF | GPVTR  | NYYVRA | VLHAAI | C  | VPGGFMLAT | V      | 108 |
| Ol-p22phox | VCLLEY | PRSKRAK | GTSVERT | GGQCFT  | VCVKAF | GPVTR  | NYYVRA | FLHAAI | C  | VPGGFMLAT | V      | 108 |
| Dr-p22phox | VCLLEY | PRSKRK  | GTSIERS | GGQCFT  | VCVKSF | GPLTR  | NYYVRA | FLHAAI | C  | VPGGFMLAT | V      | 108 |
| Ci-p22phox | VGLLEY | PRGKKN  | KGNTLL  | RSGQSC  | FSTMVN | NKL-P  | FFSVN  | YYFRAI | A  | YFIVCIPGI | ISVPTF | 119 |

\*\*\*\*\* \* \*\* \* \*\* \* \* \*\* \* \*

|                    |                    |                                                   |
|--------------------|--------------------|---------------------------------------------------|
|                    | PRR                |                                                   |
| Hs-p22 <i>phox</i> | LGTACLAIASGIYLLAAV | RGGEQWPIIEPKPRERQIGGTIKQPPSNPPPRPPAEARKKPS 168    |
| Cf-p22 <i>phox</i> | LGTACLAIASSIYLLAA  | YHGEQWPIIEPKKERPVGGTIKQPPSNPPPRPPAEARKKPS 168     |
| Mm-p22 <i>phox</i> | LGTVCLAIASVIYLLAA  | IRGEQWPIIEPKKERPVGGTIKQPPTNPPPRPPAEVRKKPS 168     |
| Rn-p22 <i>phox</i> | LGTVCLAIASVIYLLAA  | IRGEQWPIIEPKKERPVGGTIKQPPTNPPPRPPAEVRKKPS 168     |
| Xt-p22 <i>phox</i> | LGTVCLGIASIIYFLAA  | IRGEWRPIEKQAEPKPRAGETIKRPPNPPPRPPAEVRRK-- 166     |
| Tn-p22 <i>phox</i> | LGCVCLGIASIIYLVAA  | IRGEHWEPILPKKEIQKPVAESIKNPPQNPPPRPPAETRKRKV 168   |
| Tr-p22 <i>phox</i> | LGCVCLGIASIIYLVAA  | IRGEHWEPILPSKEIRKPVAESIKNPPQNPPPRPPADTRKRKV 168   |
| Ol-p22 <i>phox</i> | LGCVCLGIASLIYLA    | AAVIRGEHWEPILPRKDRKPVAESIKSPPQNPPPRPPPEIRRKQA 168 |
| Dr-p22 <i>phox</i> | LGCVCLGMASLIYLSA   | PIHGEHWEPILH-IETKKRLGESIKEPPQNPPPRPPPELRRKKA 167  |
| Ci-p22 <i>phox</i> | LGSVCVIVGSGIYLG    | AALHKERWNPIESRPQVP-STSNITQPPSQPPRLPQNKQI--- 175   |
|                    | ** * * ** * * * ** | * ** **** *                                       |

|                    |                    |                    |
|--------------------|--------------------|--------------------|
| Hs-p22 <i>phox</i> | EEEEAVAAGPPGGPQVNP | IPVTDEVV 195       |
| Cf-p22 <i>phox</i> | EEEEAAGAVGVSGGPQEN | PVPVIDEVV 195      |
| Mm-p22 <i>phox</i> | EGEEEEASAG---      | GPQVNMPVTDEVV 192  |
| Rn-p22 <i>phox</i> | EAEAAAASAG---      | GPQVNPIPVTDEVV 192 |
| Xt-p22 <i>phox</i> | --QADEVSVG---      | GGHVNPVPTDNDV- 187 |
| Tn-p22 <i>phox</i> | DDLEAAAYDN-----    | P----- 179         |
| Tr-p22 <i>phox</i> | EDLEAASYDN-----    | PISVTANE- 186      |
| Ol-p22 <i>phox</i> | KDVEGAAYDN-----    | PMSVTDDE- 186      |
| Dr-p22 <i>phox</i> | DNLDAAYDN-----     | PMSVTINE- 185      |
| Ci-p22 <i>phox</i> | -----              |                    |
