# Supplementary material for: Molecular evolution of Phox-related regulatory subunits for NADPH oxidase enzymes
Source: PubMed Central journal article supplement (PMC2121648; doi:10.1186/1471-2148-7-178), 2007-09-27
Supplement: 1471-2148-7-178-S6.pdf [file 1471-2148-7-178-S6.pdf]

## **Additional File 6**

### **Molecular taxonomy of Nox domains of the selected Nox and Duox protein**

**sequences containing newly identified sequences.** The following naming was used to

describe species of the sequences: *Caenorhabditis briggsae* (nematode-Cb), *Daphnia*

*pulex* (waterflea-Dp), *Lottia gigantea* (gastropod snail-limpet-Lg), *Homo sapiens*

(human-Hs), *Strongylocentrotus purpuratus* (sea urchin-Sp), *Ciona intestinalis*

(ascidian-Ci), *Nematostella vectensis* (sea anemone-Nv), *Monosiga brevicollis*

(choanoflagellate-Mb), *Magnaporthe grisea* (fungus-Mg), *Fusarium graminearum*

(fungus-Fg), *Coprinopsis cinerea* (fungus-Cc), *Laccaria bicolor* (fungus-Lb), *Postia*

*placenta* (fungus-Pp), *Puccinia graminis* (fungus-Pg), *Phycomyces blakesleeanus*

(fungus-Pb), *Batrachochytrium dendrobatidis* (fungus-Bd), *Dictyostelium discoideum*

(slime mold amoeba-Dd), *Arabidopsis thaliana* (plant-At), *Oryza sativa* (plant-Os),

*Physcomitrella patens* (moss-Pp), *Cyanidioschyzon merolae* (red alga-Cm),

*Phytophthora sojae* (oomycete-Ps), *Phaeodactylum tricorutum* (diatom-Pt), *Naegleria*

*gruberi* (amoebflagellate-Ng). Two Fre genes (*Aspergillus nidulans*-An and

*Saccharomyces cerevisiae*-Sc) are used as references. The An-Fre1 protein (GenBank

No. AAN61438) is defined as an out-group. Evolutionary distances (inferior bar) are

equivalent to 0.1 amino acid substitution per site.

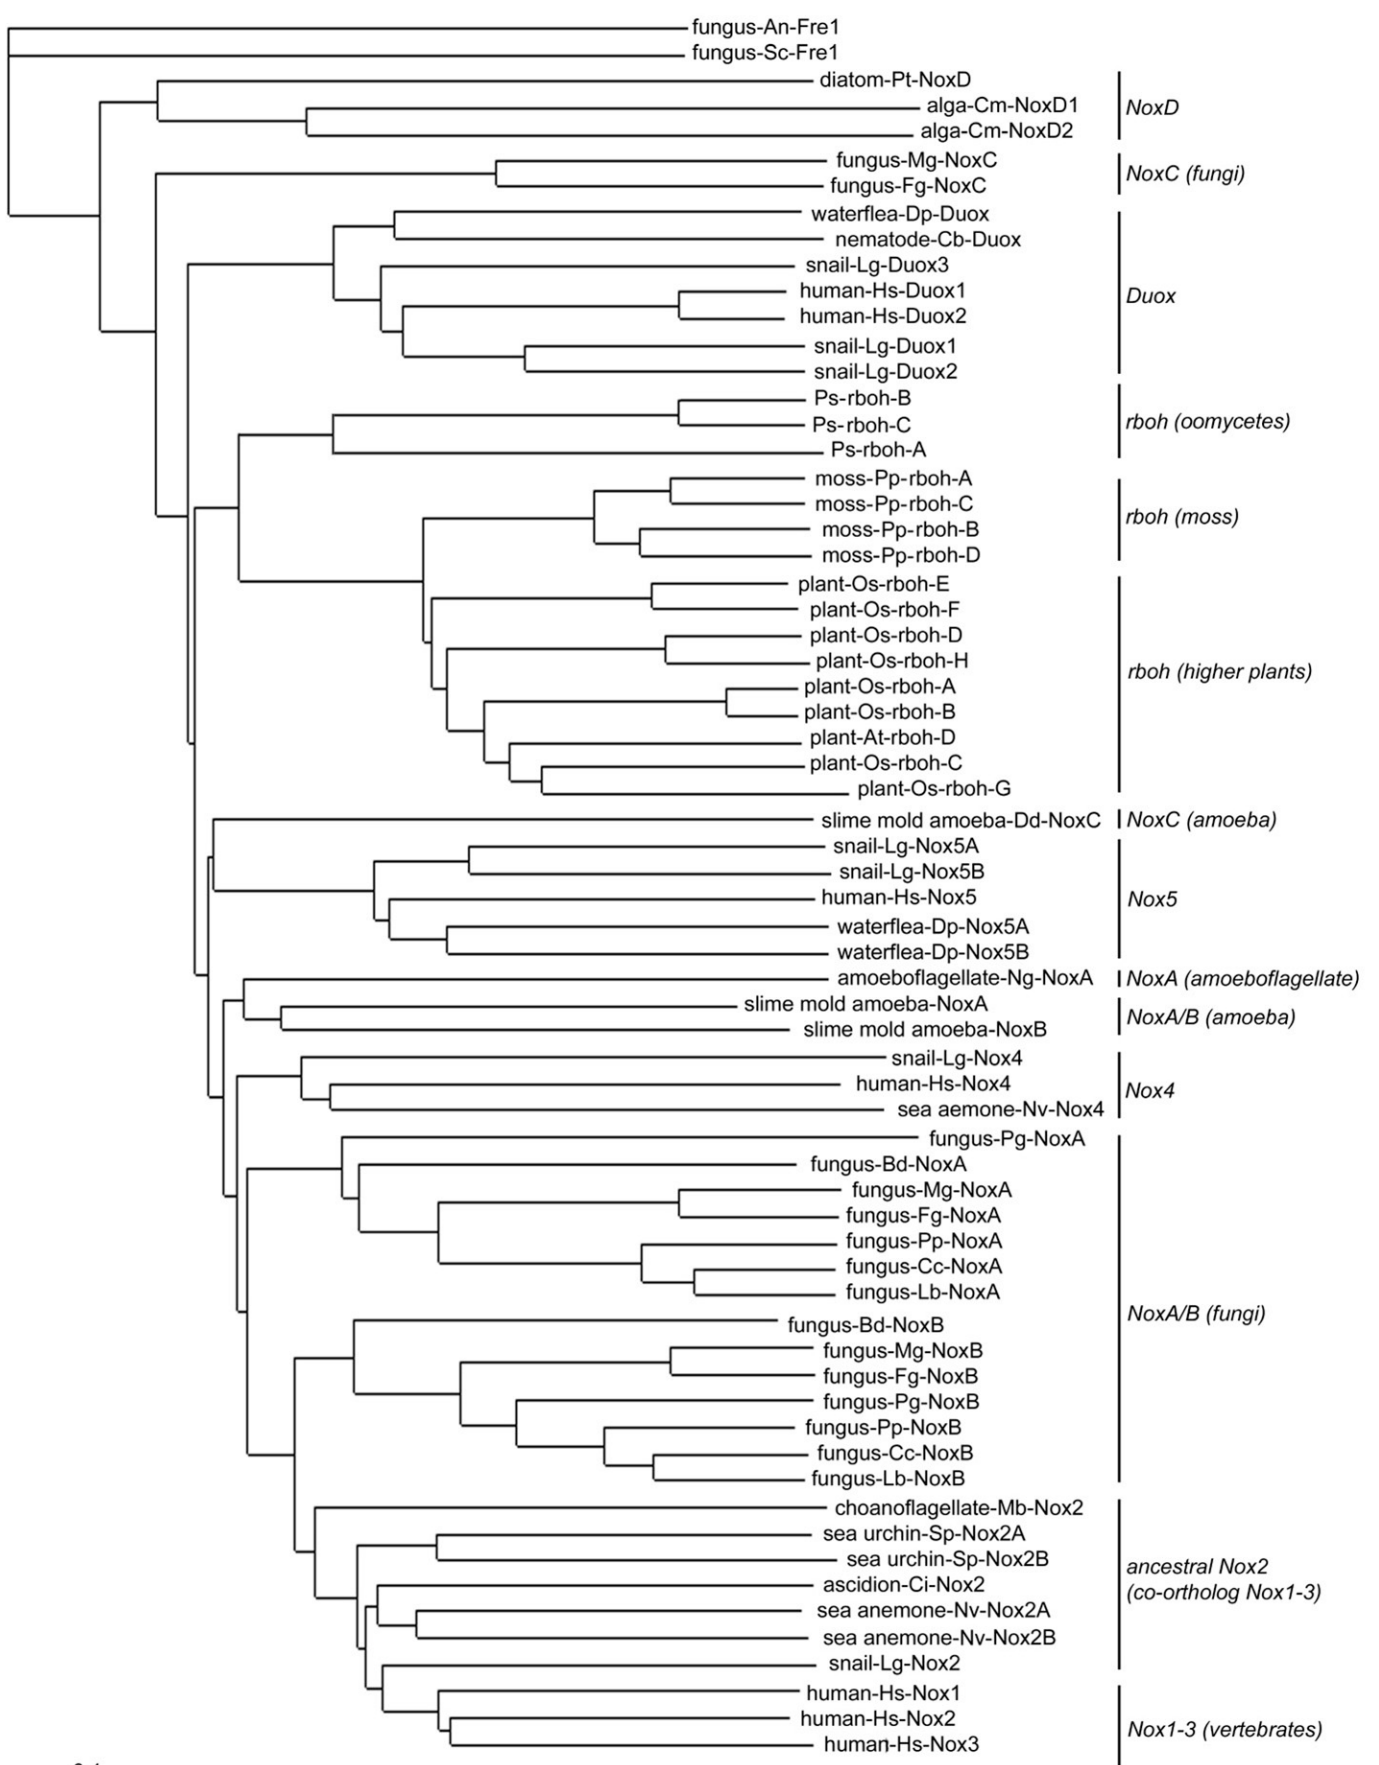

0.1

# Alignment of Nox domain

|            |                                                             |    |
|------------|-------------------------------------------------------------|----|
| Dp-Nox5A   | -----SRWSASVFWSYLRNNAAFVLAFLVAFLLVNIALFASRAYQYRQET----      | 44 |
| Dp-Nox5B   | -----SQSVFQSFSSYAKNNVFFIIFVLAYAIIVNLGLIVSRGIQYKEEN----      | 44 |
| Hs-Nox5    | -----WHNHRSQLFCLATYAGLHVLLFGLAASAHRLDGL----                 | 33 |
| Lg-Nox5A   | -----RACRYFTLKYWRNNRKEGVLFLLYFFINICLALNCFLYRKSNI----        | 43 |
| Lg-Nox5B   | -----ELPRYLQSNYIRNNLKKIIFFIYFMTNIGLYAYGAYSYSRESN----        | 43 |
| Dd-NoxC    | -----FHSCLKRYLKIIEGSKLFFISLFFIINSILVITSFLNVHANNKRAI         | 44 |
| Mg-NoxA    | -----MSVGEFLAKQLTAQKLFFNISFWGFHIGIFAYGWYKQFSDPRLAG          | 45 |
| Fg-NoxA    | -----MGSQLGFVELIKKQFVPGKLLYHFLFWTFHWGIFAYGWKQAVDPRLAG       | 49 |
| Cc-NoxA    | -----MAETWFQREFLQARRLTFNVLFYGLHLAIFAYGWYSQATNQRLAG          | 45 |
| Lb-NoxA    | -----MGESWFRREFMVPRLAFNVLFYGAHLSLFIYGWYSQATNQRLAG           | 45 |
| fPp-NoxA   | -----MGESWFRREFLAPRRLIFNVLPFGLQVSFFSYGWWAQATNNKLA           | 45 |
| Pg-NoxA    | -----MTDCEKCYTCAIQDNKLKELHRGLEGAPESEVEQCHWPNKASGLVSHR       | 48 |
| Bd-NoxA    | -----MVEITARLVAFHVLFWGFHIALFVYGFFKQKNDPELQV                 | 38 |
| Mg-NoxB    | -----WMVNEGYRRFFVVFVFMILHAMVFAFGFVNYAVKDNLQR                | 38 |
| Fg-NoxB    | -----WMINEGYRRFFVVFVFMILHALIFSACVHYAQKESLET                 | 38 |
| Cc-NoxB    | -----KQRWDVWMINEGGRQLFFGTWIFLHLLVAVFGFMHYQLKDNSEG           | 44 |
| Lb-NoxB    | -----MKKPVEPKTLREKFSIWMINEGGRQLFFGTWIFLHLLVAVFGFMNYQLKDNLVD | 54 |
| fPp-NoxB   | -----IDRWLWMINEGGKRLFFTFILLHVLVIVFGFLYDTSDDLKG              | 44 |
| Pg-NoxB    | -----TTRFKSWMVNEGSRKFFVWTWIFIHITVVFVAFNLFLKDNLTQ            | 44 |
| Bd-NoxB    | -----MVTFNWVMVNEGRSRLFFALFIASQLGYFAWSYQLWTSPTLVT            | 44 |
| Hs-Nox2    | -----MGNWAVNEGLSIFVILVWGLNVFLVWYRYVDIPPKFFY                 | 41 |
| Hs-Nox3    | -----MMGCWILNEGLSTILVLSWLGINFYLFIDTFYWYEEEEESFHY            | 42 |
| Hs-Nox1    | -----MGNWVNVHWFSVLFVWVWGLNVFLVDAFLKYEKADKYYY                | 41 |
| Lg-Nox2    | -----MGEWIVNELPKWIVVTWLLINTGIFIGTFPSYKNDIEYFY               | 41 |
| Nv-Nox2A   | -----MANLGNVDVARYIVLIWIMGINIYLFIDVYKLAATTKENMY              | 40 |
| Nv-Nox2B   | -----MNFYFSQIIWAVINIILFATTYHNYGVTKKTYT                      | 33 |
| Ci-Nox2    | -----MNARLNGFLVNEFPKYIVFLLWGLNGFLFGYYNFYNTKKTFFY            | 45 |
| Sp-Nox2A   | -----MGDKFLNEGLKYFFLLWLAANVAYWVTVFLVYEQGPQYFY               | 41 |
| Sp-Nox2B   | -----AAWAVNLIIWLVTFPKYMDNANYIY                              | 26 |
| Mb-Nox2    | -----MQFWWQQGLTFRQWFVNDGPMYTFVLLWMCANVGLFFYTFSFYTDQ-KYNY    | 50 |
| Hs-Nox4    | -----MAVSWRSLANEGVKHLCLFIWLSMNVLLFWKTFLLYNQGPPEYHY          | 45 |
| Nv-Nox4    | -----YFFFQVLWTGPFIVIFWQTYNKYSNCPPEYFY                       | 31 |
| Lg-Nox4    | -----MAYQVSVASWIRRHGQKYFLLIIVWICGCLFLFYRTFYFFKDDPSFFY       | 47 |
| Dd-NoxA    | -----MRLPTKEEIQRYWVNEGKLLVLYTLGNIAAFVYTFVHYNSPAFEV          | 49 |
| Dd-NoxB    | -----WHR-GISTYIMLFYIALNIGVGVHMFYNYHSDIFKF                   | 36 |
| Ng-NoxA    | -----FTNRHEFMNWSAEGQLVVLVWILNLFLEAFVRYYYALLLVN              | 47 |
| Os-rboh-C  | -----VRHYWQFMYLEENWKRSMVMTLWISICIALFIWKFIQYRNRAVFGI         | 48 |
| Os-rboh-G  | -----LRRGLRRLSYFMEDNWKRWVWMLWALINAGLFTWKFMAKRRHPTFDV        | 48 |
| At-rboh-D  | -----WSEKIKYFILDNWQRLWIMMLWLGICGGLFTYKFIQYKNAAYGV           | 45 |
| Os-rboh-A  | -----IRKISTLSYFEDNWKRLWVLAALWIGIMAGLFTWKFQYRNRYVFDV         | 48 |
| Os-rboh-B  | -----IRKISTKLSYLEDNWKRLWVLAALWIGIMAGLFTWKFQYRHRVYFNV        | 48 |
| Os-rboh-D  | -----VRKAAARVRVAEENWRAAWVALWFAAMASLVWKFVQYRRTPAFRV          | 48 |
| Os-rboh-H  | -----PRRAAARAQVAEENWRAAWVALWFAAMAGLFAWKVQYRRTPAFRV          | 48 |
| Os-rboh-E  | -----LKRHVSRVDFVHENWKRIWLVAVNLVGLFAYKFEQYERRAAFQV           | 48 |
| Os-rboh-F  | -----MQRRFNKTVDFIHENWKRIWVLSLWAILNIALFMYKVVQYSRRDAFQV       | 48 |
| mPp-rboh-A | -----IIKLAEKCVHFFLDNWKRIWILALWMSVMAALFAWKFLQYRDRSSWWI       | 48 |
| mPp-rboh-C | -----MMGVAEKSAYFLLDNCKRIWILALWISVMVGLFAWKFLQYRNRSAWWW       | 48 |
| mPp-rboh-B | -----RIRSF AEKTRNCFQDNWKRLWILALWMMAMTGLFIWKFFQYREHAAPFI     | 49 |
| mPp-rboh-D | -----VQDATGKAKHFLHDYWKRLWILALWVMAMTGLFTWKFQYRHHEAYAV        | 48 |
| Ps-rboh-B  | -----PIRPKSKFGAWYSANKLRIWWLLFYAILNIAFVWVWFVSYDVP---A        | 45 |
| Ps-rboh-C  | -----DNKLRIWVLLFYFIVNNIAFVWVWFVMEYDVP---A                   | 32 |
| Ps-rboh-A  | -----RWYRINKFCRRYKAEIFWLTLYFLLMVAVFIKASRFADFDP---A          | 42 |
| Hs-Duox1   | -----FIENYRRHIGCVAVFYAIAGGLFLERAYYYAFAAHHGTG                | 38 |
| Hs-Duox2   | -----FVENYRRHIVCAIFSAICVGVFADRAYYYGFASPPSD                  | 38 |
| Lg-Duox1   | -----FQTKIYEITRYIENYRLHIFWFILFNLVTLGIFIERAYYYSIEREHAG       | 48 |
| Lg-Duox2   | -----QEKIYAITKYEIYRLHIFWVLLYTLVTCGIFIERAYYYAEGREHAG         | 47 |
| Lg-Duox3   | -----PFKAKVKVIKHFENYRQHIFFLVLFVGLFGLFAERFYTYTVEREHS         | 49 |
| Dp-Duox    | -----ILRKWDELTTFLEANRQIFLYLVFVYVVTIALFVDRFIHYSFMSEHTD       | 48 |
| Cb-Duox    | -----PMTLVHQVCAFLETYRQHFVIFVCFVAINLVLFERFVWHYRYMTENRD       | 48 |
| Mg-NoxC    | -----FRRVRYWAVHGPEIAFLGIVVGLQLGLGIWQCHKYASGEQYQA            | 44 |
| Fg-NoxC    | -----WRRIRSYWAVHGPEIVFLGVVISMQLAFLGIWQLVKYQTPPYRA           | 44 |

|            |                                                             |    |
|------------|-------------------------------------------------------------|----|
| Cm-NoxD2   | -----LDLWNERVGESGLFFSLLVAYWCSQAWFFVYGVKYALSLALPSD           | 44 |
| Cm-NoxD1   | -----QIWNIHLVENGLWYSIVLLFFCAMSWFFAYGVRVYIVDLRPSG            | 43 |
| Pt-NoxD    | -----WAKSEAFFFNQGANLAFGLMLALNILMLVWGTYEFTGTRFVTD            | 44 |
| An-Fre1    | MLLRISFLAIFVPAMAKQKSFDDAVSSLDADCLCIYTALSQYTFSGTPAGGSYNHSISV | 60 |
| Sc-Fre1    | -----MVRTRVLFCLFISPFATVQSSATLISTSCISQAALYQFGCSSKSKSCYCKN    | 51 |
|            |                                                             |    |
| Dp-Nox5A   | -----PAYVIAR-ACGQVLNFCNFVVL-MLHHCITWIRQTKLAV-----           | 83 |
| Dp-Nox5B   | -----VFYILAR-CGGQALNFCNFILVL-MLRHCITLLRQIGCGY-----          | 83 |
| Hs-Nox5    | -----ASVMVAK-GCGQCLNFCNFI AVL-MLRRCLTWLRATWLAQ-----         | 72 |
| Lg-Nox5A   | -----VYII IAR-GCGMCLNFCNFILMT-MLRKTITYIRTFKNLH-----         | 82 |
| Lg-Nox5B   | -----NAII IAR-GSGMCLNFCNFVVL-MLRKCITWLRWQYVYC-----          | 83 |
| Dd-NoxC    | EL----FGPGVYI TR-IAAQLIEFNAAI ILMT-MCKQLFTMIRNTKFKF-----    | 87 |
| Mg-NoxA    | LN--TLTFSVWISRG--AGLVLSVDGML ILLP-VCRTIMRWIRP-----          | 84 |
| Fg-NoxA    | LN--TLKFSVWISRG--AGLVLSVDCML ILLP-VCRTVMRWVRP-----          | 88 |
| Cc-NoxA    | LN--TLQWSVWVSRG--AGLVLALDGGIL ILLP-MLRNI IRVVRP-----        | 84 |
| Lb-NoxA    | LN--SLKYSVWTSRG--AGLVLAFDGGL ILLP-MLRNI IRI IRP-----        | 84 |
| fPp-NoxA   | LN--ALQWSVWVSRG--AGLVLAFLAACLLP-MLRNCIRVIRP-----            | 84 |
| Pg-NoxA    | SN--GIGVPGSHEDGSLKGFHVCMRRLMPLSRWVRTFYTSLQK-----            | 90 |
| Bd-NoxA    | LN--SIGPSVTISRG--AGLVLGVDCAALLIP-VCRNIVRFRSS-----           | 78 |
| Mg-NoxB    | AR--DTFGPTFM IAR-AAALVLHFDVAL ILLP-VCRTFISLARQTPLN-----     | 82 |
| Fg-NoxB    | SR--QTFGFTFI IAR-SAALVLHVDVAI ILLP-VCRTLISLLRQTPLN-----     | 82 |
| Cc-NoxB    | AR--SVFGITFPIAR-TAALVLHVDVIF ILLP-VCNRFISLLRRTPLN-----      | 88 |
| Lb-NoxB    | AR--ALFGVFTFIAR-TAALILHIDVIF ILLP-VCNRFVSLRRTPLN-----       | 98 |
| fPp-NoxB   | AR--KTFGITYP IAR-SAALVLHVEVAF ILLP-ICNRFISLLRRTPLN-----     | 88 |
| Pg-NoxB    | AR--ATFNITYPIAR-ASALVLHVDVAF ILLP-ICNRFITLLRRSALN-----      | 88 |
| Bd-NoxB    | FR--TVLQHGHPMAR-AAANVINLDCGILF-----                         | 72 |
| Hs-Nox2    | TR--KLLGSALALAR-APAACLNFCNML ILLP-VCNLLSFLRGSSAC-----       | 85 |
| Hs-Nox3    | TR--VILGSTLAWAR-ASALCLNFCNML ILLP-VSRNLSFIRGTSIC-----       | 86 |
| Hs-Nox1    | TR--KILGSTLACAR-ASALCLNFCNSTL ILLP-VCNLLSFLRGTCFS-----      | 85 |
| Lg-Nox2    | LR--LIVGDALCFAR-ASAACLNFCNFI ILLP-VCNRFISFLRGTCAR-----      | 85 |
| Nv-Nox2A   | LN--KLVKFGLALAR-APAMVLNFCNML ILLT-MCRNLSFIRGSC-----         | 83 |
| Nv-Nox2B   | LR--EVIKNGLPIAR-GAAMVLNFCNML ILLS-MCRNLSLIRRHKST-----       | 78 |
| Ci-Nox2    | TR--VLLGPALALAR-APAACLNCLLVLIP-VCNLLSLFRKACMC-----          | 89 |
| Sp-Nox2A   | IR--RITGVGLSTAK-AAGAALNLSMI ILLP-ICRNLSFIRGSCATNTL-----     | 88 |
| Sp-Nox2B   | TK--YLMKNGLPVAR-ASAACLNFCNML ILLP-VCNRMISYLRGSCSTKF-----    | 73 |
| Mb-Nox2    | LR--RIVHFGLPVAR-GAASVLNLCALVLLP-VCNLVNFCRIGFES-----         | 94 |
| Hs-Nox4    | LH--QMLGLGLCLSR-ASASVLNLCAL ILLP-MCRTLLAYLRGS-QKVPS-----    | 91 |
| Nv-Nox4    | LH--NMLGNLSWSR-GAAAVLWFSCLMMLP-MCRNLLAFVRNT-LCKSS-----      | 77 |
| Lg-Nox4    | VR--QILGVSMCISR-GTASILNLCGL ILLP-TCRCILTFITYLNSKVRI-----    | 94 |
| Dd-NoxA    | VG-----YGVC FAR-GCAQLLKNLNCAL ILLP-VLRNLSFLRGTFLN-----      | 89 |
| Dd-NoxB    | LG-----LSFCFSR-TAARLNLNSAV ILLP-VLRNLSWLRGTIVN-----         | 76 |
| Ng-NoxA    | ITGVTVVPFYVALAR-GFGQLNFCNALL ILLP-TMRTLLNVFRSLKFG-----      | 93 |
| Os-rboh-C  | MG-----YCVTTAK-GAAETLKFNMALVLLP-VCNNTITWIRSKTQVGA-----      | 90 |
| Os-rboh-G  | MG-----YCVCAK-GGAETTKFNMAL ILLP-VCNNTITWLRSRTKLGA-----      | 90 |
| At-rboh-D  | MG-----YCVCAK-GGAETLKFNMAL ILLP-VCNNTITWLRNKTCLGT-----      | 87 |
| Os-rboh-A  | MG-----YCVTTAK-GAAETLKNMAI ILLP-VCNNTITWLRN-TRAAR-----      | 89 |
| Os-rboh-B  | MG-----YCVTTAK-GAAETLKNMAI ILLP-VCNNTITWLRN-TRAAR-----      | 89 |
| Os-rboh-D  | MG-----YCLPTAK-GAAETLKNMALVLLP-VCNNTITWLRN-SWARF-----       | 89 |
| Os-rboh-H  | MG-----YCLPTAK-GAAETLKNMALVLLP-VCNNTITWLRN-SWARF-----       | 89 |
| Os-rboh-E  | MG-----HCVCVAK-GAAEVLKNMAL ILLP-VCNNTITWLRN-TALSH-----      | 89 |
| Os-rboh-F  | MG-----YCVCIK-GAAETLKNMAV ILLP-VCNNTITWLRN-TALSK-----       | 89 |
| mPp-rboh-A | MG-----DCLCVAK-GAAETLKNMAL ILLP-VCNNTITWLRN-TRLWK-----      | 89 |
| mPp-rboh-C | MG-----DCLCVAK-GAAETLKNMAL ILLP-VCNNTITWLRN-TRLRR-----      | 89 |
| mPp-rboh-B | MG-----NLCVAK-GAAETLKNMALVLLP-VCNNTITWLRN-TRLGK-----        | 90 |
| mPp-rboh-D | MG-----ECLCVAK-GAAETLKNMAL ILLP-VCNNTITWLRN-TRLGK-----      | 89 |
| Ps-rboh-B  | IG-----WGLRIAR-ANAQVAMVNCVFLVLLP-MCRSITQVMKRSRILWR-----     | 87 |
| Ps-rboh-C  | IG-----WGLRIAR-ANAQVAMVNCVFLVLLP-MCRSITQVMKRSRILWR-----     | 74 |
| Ps-rboh-A  | VG-----NCPRVAK-GFAEICLVNMFVLLP-MCRNFVTGLRTPVNVN-----        | 84 |
| Hs-Duox1   | ITD--TTR-VGIILSR-GTAASISFMFSYILLT-MCRNLTFLRETFLNR-----      | 83 |
| Hs-Duox2   | IAQ--TTL-VGIILSR-GTAASVFMFSYILLT-MCRNLTFLRETFLNR-----       | 83 |
| Lg-Duox1   | LRR--LAG-YGVSVTR-GAASVQMFVYVLLVLT-MSRNTLTFRETFLHR-----      | 93 |
| Lg-Duox2   | LRR--LSGAWTTAMIR-GSASVIMFTYVLLVLT-MCRNLTFLRETFLHR-----      | 93 |
| Lg-Duox3   | LMR--LMS-YGISITR-GAAAAMSFTFSLLLT-MCRNLTFLRETFLNR-----       | 94 |

|          |                                                              |     |
|----------|--------------------------------------------------------------|-----|
| Dp-Duox  | LRH-IMG-VGIATR-GSAAALSFCYSLLLT-MSRNLLTKLKEFSVQQ-----         | 93  |
| Cb-Duox  | LRR-VMG-AGIATR-GAAGALSFCMALILLT-VCRNIITLLRETVISQ-----        | 93  |
| Mg-NoxC  | AFG----WGVALAK-LCAGALYPTFFFLILS-MSRYFSTFLRRSYHLRSR-----      | 87  |
| Fg-NoxC  | AFG----WGVVMAK-TCAGALYPTFFFLILS-MSRYFSTWLRRSYHISR-----       | 87  |
| Cm-NoxD2 | WSR----YMLIFGR-GFGYVATFNALLLPIT-VNRTLNIYRLPLYD-----          | 86  |
| Cm-NoxD1 | ILR----YAGSIAR-GMGFACTFCSLVPLT-INRTLATVLYRTPLYD-----         | 85  |
| Pt-NoxD  | SD---ILRVTLPIAR-AGGRVVTWNAALIFLS-GSKYLWTWLRQSPLHLG-----      | 89  |
| An-Fre1  | TAFFAEESYIQLTINFDSICNSTVEIASMYASARARCDGNSPAASVSFWQE-----     | 111 |
| Sc-Fre1  | IN---WLSVVTACAYENSKSNKTLDSALMKLASQCSSIKVYTLEDMKNIYLNASNYLRAP | 108 |

|            |                                                         |     |
|------------|---------------------------------------------------------|-----|
| Dp-Nox5A   | -----FLPLDQH-VYLHKLCG-----                              | 98  |
| Dp-Nox5B   | -----FLPLDLH-VYLHKVCG-----                              | 98  |
| Hs-Nox5    | -----VLPLDQN-IQFHQLMG-----                              | 87  |
| Lg-Nox5A   | -----FLPLDQH-IEMHKLGT-----                              | 97  |
| Lg-Nox5B   | -----ILPLDQH-ILFHKTTG-----                              | 98  |
| Dd-NoxC    | -----LFPVDKY-MTFHKLIG-----                              | 102 |
| Mg-NoxA    | -----KIRFI-PLDEN-IWFHRQIA-----                          | 102 |
| Fg-NoxA    | -----KIRFL-PLDEN-LWMHRQLA-----                          | 106 |
| Cc-NoxA    | -----KLTWLPADEN-IWFHRQVA-----                           | 103 |
| Lb-NoxA    | -----KLTWAFPADEN-IWFHRQVA-----                          | 103 |
| fPp-NoxA   | -----KVAFLPADEN-IWFHRQAA-----                           | 103 |
| Pg-NoxA    | -----PYAPFKTEDRM-ARLSRQVA-----                          | 109 |
| Bd-NoxA    | -----FLNKYIPIDSN-LYFHKWLA-----                          | 97  |
| Mg-NoxB    | -----GIIQFDKN-ITFHITTA-----                             | 98  |
| Fg-NoxB    | -----GILQFDKN-ITFHIVTA-----                             | 98  |
| Cc-NoxB    | -----DIIPFDKN-ITFHKATA-----                             | 104 |
| Lb-NoxB    | -----DIIPFDKN-ITLHKATA-----                             | 114 |
| fPp-NoxB   | -----SYIPFDKN-ITFHKAVA-----                             | 104 |
| Pg-NoxB    | -----QVIPFEKN-ITFHKFTG-----                             | 104 |
| Bd-NoxB    | -----TFDKN-ITFHIWIA-----                                | 85  |
| Hs-Nox2    | -----CSTRVRRQLDRN-LTFHKMVA-----                         | 105 |
| Hs-Nox3    | -----CRGPWRRQLDKN-LRFHKLVA-----                         | 106 |
| Hs-Nox1    | -----CSRTLKQLDHN-LTFHKLVA-----                          | 105 |
| Lg-Nox2    | -----CHR-ARRQLHRQ-ITYHKYIA-----                         | 104 |
| Nv-Nox2A   | -----CCSFMLRLLDKHHVTFHKYIA-----                         | 104 |
| Nv-Nox2B   | -----CMAPVIRVLDSK-ITFHKYIA-----                         | 98  |
| Ci-Nox2    | -----CPRRIRRVLDKN-IKFHRMCA-----                         | 109 |
| Sp-Nox2A   | -----CRRSVRRQLDKN-LTFHKTV-----                          | 108 |
| Sp-Nox2B   | -----SRRNLRQLDKN-ITFHKLIA-----                          | 93  |
| Mb-Nox2    | -----KRSIRRLFDKN-ILFHKWCA-----                          | 113 |
| Hs-Nox4    | -----RRTRRLLDKS-RTFHITCG-----                           | 109 |
| Nv-Nox4    | -----RRLRRLLDKH-IWFHKACA-----                           | 95  |
| Lg-Nox4    | -----STIRVILESC-KGFHKVCA-----                           | 112 |
| Dd-NoxA    | -----NYVPFDKN-IVFHKLIA-----                             | 105 |
| Dd-NoxB    | -----NYIPIDKH-LNFHKLCA-----                             | 92  |
| Ng-NoxA    | -----SIFPLDKN-LVFHRYLA-----                             | 109 |
| Os-rboh-C  | -----VVPFNDN-INFHKV-----                                | 103 |
| Os-rboh-G  | -----VIPFNDN-INFHKV-----                                | 103 |
| At-rboh-D  | -----VVPFDDN-LNFHKV-----                                | 100 |
| Os-rboh-A  | -----ALPFDDN-INFHKT-----                                | 102 |
| Os-rboh-B  | -----ALPFDDN-INFHKT-----                                | 102 |
| Os-rboh-D  | -----FVPFDDN-ITFHKM-----                                | 102 |
| Os-rboh-H  | -----FVPFDDN-ITFHKVSSSGFKWAPPGRSNQCSVAGEPAGTEDPRPGRRLVK | 139 |
| Os-rboh-E  | -----VIPFDDN-INFHKV-----                                | 102 |
| Os-rboh-F  | -----VVPFDDN-INFHKV-----                                | 102 |
| mPp-rboh-A | -----IIPFDDN-LDFHKAS-----                               | 103 |
| mPp-rboh-C | -----IIPFDDN-LDFHK-----                                 | 101 |
| mPp-rboh-B | -----IIPFDDN-LDFHKET-----                               | 104 |
| mPp-rboh-D | -----LIPFDEN-LDFHKASL-----                              | 104 |
| Ps-rboh-B  | -----YIPFDDN-IAFHKIAG-----                              | 102 |
| Ps-rboh-C  | -----IIPFDDH-IAFHKISG-----                              | 89  |
| Ps-rboh-A  | -----HLPIDHH-IEFHKICG-----                              | 99  |
| Hs-Duox1   | -----YVPFDAA-VDFHRLIA-----                              | 98  |

|          |                                                            |     |
|----------|------------------------------------------------------------|-----|
| Hs-Duox2 | -----YVPFDAA-VDFHRWIA-----                                 | 98  |
| Lg-Duox1 | -----FIPFDAF-HAMHKYTA-----                                 | 108 |
| Lg-Duox2 | -----FIPFDSA-VAFHKYIA-----                                 | 108 |
| Lg-Duox3 | -----FIPFDSH-ISFHKVIA-----                                 | 109 |
| Dp-Duox  | -----YIPLDSH-IQFHKICA-----                                 | 108 |
| Cb-Duox  | -----YIPFDSA-IAFHKIVA-----                                 | 108 |
| Mg-NoxC  | -----FINWDLS-QEFHIKIS-----                                 | 102 |
| Fg-NoxC  | -----FFNWDLs-QEFHIRIS-----                                 | 102 |
| Cm-NoxD2 | -----IFSVARWLPDLHAI IA-----                                | 102 |
| Cm-NoxD1 | -----LLCVERWIPDMHTIVG-----                                 | 101 |
| Pt-NoxD  | -----FPIDNVMPYYHKMIA-----                                  | 104 |
| An-Fre1  | ---VCDVDISSLETNRSTTYTSMsIVDPDVNTTASTG---TIKPNVLLSESYYRRAYK | 163 |
| Sc-Fre1  | EKSDKKTVVVSQPLMANETAYHYYYEENYG-----                        | 137 |

|            |                                                        |     |
|------------|--------------------------------------------------------|-----|
| Dp-Nox5A   | -----FTIIFFGTLHTAMHMINF---SNELVSPVT-----               | 125 |
| Dp-Nox5B   | -----GVVVVLSAVHTLMHLINPLNIADKVESPVT-----               | 129 |
| Hs-Nox5    | -----YVVVGLSLVHTVAHTVNF-----VLQAQAE-----               | 112 |
| Lg-Nox5A   | -----IMI AVFTVIHTLAHIGNA-----VVAE-----                 | 120 |
| Lg-Nox5B   | -----IMI AVHSLIHTMGHIGNA-----VIVSE-----                | 121 |
| Dd-NoxC    | -----YTLIIASFLHTIGWIVGMA-----VATGKPD-----              | 128 |
| Mg-NoxA    | -----YAMLIFSITHAAHYVNFNVERLQIRA-----                   | 130 |
| Fg-NoxA    | -----YSMLLFTCLHTGAHYVNFYNVEITQIRP-----                 | 134 |
| Cc-NoxA    | -----YSMAFWSVVHTTAHYVNF INVERTQIRK-----                | 131 |
| Lb-NoxA    | -----YSLAFWAMVHTTAHYVNF INVERTQIRK-----                | 131 |
| fPp-NoxA   | -----YCLAFWSMVHTTAHYVNF INVERTQVRQ-----                | 131 |
| Pg-NoxA    | -----YTLFFTAIHTTAHYVNMFHVETTQIRP-----                  | 137 |
| Bd-NoxA    | -----YSMLFFSLLHTNAHYTNFFFVETKLPsLG-----                | 126 |
| Mg-NoxB    | -----WSIVFFSWVHTVAHWNNFAQIAAQ-----                     | 122 |
| Fg-NoxB    | -----WSIVFWSVWHTIAHWNNFAQVAIK-----                     | 122 |
| Cc-NoxB    | -----WSIVIGSAVHTLAHMVNF TKLALS-IPN-----                | 131 |
| Lb-NoxB    | -----WSIVAGTVVHVVAHMVNFYKLAMADTDA-----                 | 142 |
| fPp-NoxB   | -----WGICLFTFIHIAAHMVNFARLAFADPLA-----                 | 132 |
| Pg-NoxB    | -----FALAFFSAIHILAHMVNFGLAVR-----                      | 128 |
| Bd-NoxB    | -----YSIAFWTFVHVIAHYFNYNVRIA-----                      | 109 |
| Hs-Nox2    | -----WMIALHSAIHTIAHLFNVEWCVNARVN-----                  | 132 |
| Hs-Nox3    | -----YGI AVNATIHI VAHFNLERYSQSE-----                   | 133 |
| Hs-Nox1    | -----YMICLHTAIHIAHLFNFDcYSRSRQA-----                   | 132 |
| Lg-Nox2    | -----YMICLQTAIHIAAHCFDFEFLIEAYDS-----                  | 131 |
| Nv-Nox2A   | -----YMICLQTAIHCAHIFNVEFLILAWQ-----                    | 130 |
| Nv-Nox2B   | -----YTI CFFTIVHVGACYNFENLIDSWs-----                   | 124 |
| Ci-Nox2    | -----YMI VMLTLIHYFAHCFNVDFFTSAYQSKILATDTPAI-----       | 146 |
| Sp-Nox2A   | -----YMI VVVTIVHVVAHAFNFRNLNHYRCVTT-----               | 138 |
| Sp-Nox2B   | -----YAI GFFVILHVGACFNLQNLyNG-RKATS-----               | 122 |
| Mb-Nox2    | -----YVICVFASIHICAHFFNVLNVEDGTYG-----                  | 141 |
| Hs-Nox4    | -----VTICIFSGVHVAHLVNALNFSVNYSED-----                  | 137 |
| Nv-Nox4    | -----ITTI IAAVVHTVAHLINGKRFSENYSTD-----                | 123 |
| Lg-Nox4    | -----ITII LSSVIHVIGHIFNALKYSLYYNYQ-----                | 140 |
| Dd-NoxA    | -----WVICFATFGHVMAHFNFR-LYQDITPQ-----                  | 132 |
| Dd-NoxB    | -----FMLFCCTIIHCVGHYISFKKINDDVLKI-----                 | 120 |
| Ng-NoxA    | -----YWI VVCVIGHTLGHYLNYACCWQLYN-----                  | 135 |
| Os-rboh-C  | -----IAAGVAVGVALHAGAHLCDFPRLHAS-----                   | 131 |
| Os-rboh-G  | -----VAGGVVGVVALHGVTHLTCDFPRLHAS-----                  | 131 |
| At-rboh-D  | -----IASGIVVGVLLHAGAHLCDFPRLIAAD-----                  | 128 |
| Os-rboh-A  | -----IAAAIVVGIILHAGNHLVDFPRLIKSS-----                  | 130 |
| Os-rboh-B  | -----IAAAIVVGIILHGGLHLVDFPRLIGSS-----                  | 130 |
| Os-rboh-D  | -----IATAIVVGITLHAGNHLACDFPRLIASG-----                 | 130 |
| Os-rboh-H  | APVIQKSPRPTGLPLSCGATIIATAIALGICTHAGTHLACDFPRLIGSS----- | 188 |
| Os-rboh-E  | -----IAATIAAATAVHTLAHVTCDFPRLINCP-----                 | 130 |
| Os-rboh-F  | -----IALTIAIGAATHLAHVTCDFPRLVSCP-----                  | 130 |
| mPp-rboh-A | -----QIVAGGMAAGVFLHVGCHATCDLPRFVNAD-----               | 133 |
| mPp-rboh-C | -----IVAGGIAAGVILHATCHITCDIPRFVEAD-----                | 130 |
| mPp-rboh-B | -----GGIAAGVFIHGVCHITCDIPKFVESG-----                   | 130 |
| mPp-rboh-D | -----LPDPEHCIAAAIAGVVFVHGTLHITCDIPKFVNCD-----          | 139 |

Ps-rboh-B -----SVLLTAGLIHTIAHFVNEIYLYLVATPEEIK----- 133  
 Ps-rboh-C -----SVLLTAGLIHTIAHFVNEIYLYLIATPDEVK----- 120  
 Ps-rboh-A -----VLLLLAFLGHTAAWLV--IVVYVRTVPLAVW----- 128  
 Hs-Duox1 -----STAIPVAVLHVSUGHVNVVYLFISPLSV----- 126  
 Hs-Duox2 -----MAAVVLAILHSAGHAVNVYIFSVSPLSL----- 126  
 Lg-Duox1 -----LLALIFTAMHIIHGGINLFHISTQASSD----- 136  
 Lg-Duox2 -----VLAMIGTIVHIFGHAVNLYCVVTQPPQD----- 136  
 Lg-Duox3 -----WTALFFSLGHVIGYSFNFYHLATQPTKF----- 137  
 Dp-Duox -----LTAFFFSMLHTVGHVNVFYHVSTQPIEH----- 136  
 Cb-Duox -----LFAAFWATLHTVGHCVNFYHVGTSQSEGE----- 136  
 Mg-NoxC -----IVALVLASLHALGHLSGTFNWSRPERQ----- 130  
 Fg-NoxC -----CVAILLATLHAIGHLTGSFVHGSDPANE----- 130  
 Cm-NoxD2 -----RWFTIAGWIHGILLSVAYGVGTLPPFRGG----- 130  
 Cm-NoxD1 -----TSLAATGWIHGIAQVINYAASVVFVRGG----- 129  
 Pt-NoxD -----WTIIFMGCVVHTIPQVINYATKELRIEGG----- 133  
 An-Fre1 TCVIHDKALGQDIRFGWGLMGYVVALVFGMAQKILSLWSARRALDSGRDAEAN----- 217  
 Sc-Fre1 -----IHLNLMRSQWCAWGLVFFWVAVLTAATILNLKRVFGKNIMANS----- 181

Dp-Nox5A -----NQTHSTEEWLFTTIPGLFGLIPGVAN-LTG 154  
 Dp-Nox5B -----KETHSAIEWLFTTEPGLFGLVPLGAN-LTG 158  
 Hs-Nox5 -----ASPFQFWELLLTTRPG-IGWVHGSAS-PTG 140  
 Lg-Nox5A -----DFGVTWVEFIFTTKAN-IGWVLGFAP-LSG 148  
 Lg-Nox5B -----TNNITAVEVIFTTKAN-LGWLLGSAP-ITG 149  
 Dd-NoxC -----NIFYDCLAPHFKFRPTVWEMIFNSLPGVTG 158  
 Mg-NoxA -----QTAVQIH-----YAQPGGATG 146  
 Fg-NoxA -----VTALQIH-----YAQPGGITG 150  
 Cc-NoxA -----QTAQMIH-----YTQPGGITG 147  
 Lb-NoxA -----QTALQIH-----YTQPGGITG 147  
 fPp-NoxA -----EYALQIH-----YTQAGGITG 147  
 Pg-NoxA -----EKAIEIM-----YSETGPLTG 153  
 Bd-NoxA -----LKAWMIH-----YLAWSGATG 142  
 Mg-NoxB -----QKLG--IYGWLLAN-----FVSGPGWGTG 143  
 Fg-NoxB -----YNLG--IYGWLLAN-----FVSGPGWGTG 143  
 Cc-NoxB -----MTTGQRIGAFMAAN-----FATGPGLTG 154  
 Lb-NoxB -----KTTGQRVLAFLLEAN-----FNTGPGVTG 165  
 fPp-NoxB -----KTPGERFVWVLIAN-----FTTGPVGTG 155  
 Pg-NoxB -----TQTG--IVGFIGAN-----FLTGPVGTG 149  
 Bd-NoxB -----LG--VSAEYLS-----LVSGPGLTG 127  
 Hs-Nox2 -----NSDPYSVALSELGDRQNE---SYLNFARKRIKNEGGGLYLA-----VTLLAGITG 179  
 Hs-Nox3 -----EAQGLLAALSCLKGNTPE---SYLNPVRTFPTNTTTEL-----LRTIAGVTG 177  
 Hs-Nox1 -----TDGSLASILSSLSHDEKKG--SWLNPIQSRNTTVEYVT-----FTSIAGLTG 178  
 Lg-Nox2 -----PTKS-IQAITNLDTSNNG---TWLNPVRVQGTDATREV-----FKTIAGVSG 174  
 Nv-Nox2A -----KGG-IYTKLCQLEDVGN---TYINPIRDPNADPITVL-----WTIVSGVTG 173  
 Nv-Nox2B -----KENEIDAKLSQLD--GAD---NWNPIR--SEMSVGRK-----GSKFAGVTG 164  
 Ci-Nox2 -----IQQKLIAKLIQIGNNGNE---TYLNPPIR--KSVFVSGAV-----FLLTGGWGTG 190  
 Sp-Nox2A -----DNDELCEGISAIGRKFKAKPEDNWLNP IQGAKTLPAGLGLIEQA-----LIPIAGWSG 191  
 Sp-Nox2B -----EDDWLANRLSQP--SFDLNP---FKTIRSSD--VSLGLVIGPG-----LSLLAGWGTG 167  
 Mb-Nox2 -----RILRDGTMPMSQEEVL-----FTTVAGGTG 165  
 Hs-Nox4 -----FVELNAARYRDEDPRKLL-----FTTVPGLTG 164  
 Nv-Nox4 -----HPPLNFAKNRQDPLEFV-----MLSVAGFTG 150  
 Lg-Nox4 -----YPEVNGASYPNQNPIFI I-----LWTVSGVTG 167  
 Dd-NoxA -----EYKRILGIDYPNLTPIKYA-----FATLAGWGTG 160  
 Dd-NoxB -----DDGKSVAGDYLNININNFPEDEKYLFKSVPGITG 154  
 Ng-NoxA -----SARTPLEACWVNK-----YGTGTG 153  
 Os-rboh-C -----DAQYELMKP--FFGEKRPPNYWWFVKGTGEGWGTG 162  
 Os-rboh-G -----DAAYEPMKK--YFGQTRIPDYWWFVRGVEGITG 162  
 At-rboh-D -----EDTYEPMEK--YFGD--QPTSYYWWFVKGVEGWGTG 158  
 Os-rboh-A -----DEKYAPLGQ--YFGEIKPT--YFTLVKGVGVEGITG 160  
 Os-rboh-B -----EEKYAPLGK--YFGETKPT--YLTLVKGVGVEGITG 160  
 Os-rboh-D -----PEEYRLVAD--AFGPEKPT--YVGLLSGVEGITG 160  
 Os-rboh-H -----REEYELLLSGFFGASRPT--YRGLLAGVEGVGTG 219  
 Os-rboh-E -----SDKFMATLGPYFNYVQPT--YADLLESAPGVGTG 161  
 Os-rboh-F -----RDKFEATLGPYFNYVQPT--YSSLVASTPGWGTG 161

|            |                                                              |     |
|------------|--------------------------------------------------------------|-----|
| mPp-rboh-A | -----KETFFKHLGDHFDT-QPT-YSDILNMSVGYSG                        | 163 |
| mPp-rboh-C | -----KEKFFKYLGDDDFD-QPT-YSDILRMSVGYSG                        | 160 |
| mPp-rboh-B | -----DDKFFKYLGDEFEK-HPT-YANIAVMPVAITG                        | 160 |
| mPp-rboh-D | -----DEKFFFEALGDQFDK-HPT-YADIAVTPVAITG                       | 169 |
| Ps-rboh-B  | -----RSIFVTRHVSFVNGERPPFITMLQSLPVWTG                         | 165 |
| Ps-rboh-C  | -----RSIFVTRHVSTFVNGERPPFTTMLQALPVWTG                        | 152 |
| Ps-rboh-A  | -----K--QSRYYHLAFVRDEN--LLLFALRVPIWTG                        | 156 |
| Hs-Duox1   | -----LSCLFPGLFHDDGSELQKYYWFFQTVPGLTG                         | 159 |
| Hs-Duox2   | -----LACIFPNVFNVDGSKLPQKYYWFFQTVPGMTG                        | 159 |
| Lg-Duox1   | -----LNCYFREYFR--ATDVLATPHYWAFTTITGITG                       | 167 |
| Lg-Duox2   | -----VSCLFREYFR--GSHEIATPHYWAYQTITGLAG                       | 167 |
| Lg-Duox3   | -----LCIFDSIVFR--ADKLPFSFWLFGNMTGFTG                         | 167 |
| Dp-Duox    | -----LRCLSKEISLP--SDYKPTITYWLFQTLTGLTG                       | 167 |
| Cb-Duox    | -----LACLFQEAFFG--SNFLPSISYWFYGTITGLTG                       | 167 |
| Mg-NoxC    | -----DAVGVLGQVPRPYSAYVSSLPGITG                               | 158 |
| Fg-NoxC    | -----DAVAEALGPKVPRPYIDYVRSLPGFTG                             | 158 |
| Cm-NoxD2   | -----FLPFSNTIP-----TTMVFVTG                                  | 147 |
| Cm-NoxD1   | -----LFTGPAALP-----ATMLFVTG                                  | 146 |
| Pt-NoxD    | -----PIWLWGDG-----LATKQLLVTG                                 | 151 |
| An-Fre1    | -AVSGPIECKQIPTPLSSISYALRTYIVVPASFTPIFHHQRLLYGHSSIPKRLDFLIVSG | 276 |
| Sc-Fre1    | -----VKKSLIYPSVYKDYNERTFYLWKRLPFNFTTRGKGLV                   | 219 |

|           |                              |           |
|-----------|------------------------------|-----------|
| Dp-Nox5A  | WGLCVILGVMIPCSLPPFVRKTG----- | 176       |
| Dp-Nox5B  | WALVGILIMGLCSLPCVRKSG-----   | 180       |
| Hs-Nox5   | VALLLLLLLMFICSSSICRRSG-----  | 162       |
| Lg-Nox5A  | VILDVILIVMICSMPIRRSG-----    | 170       |
| Lg-Nox5B  | VLLCPILIVMVICSMFVRRSG-----   | 171       |
| Dd-NoxC   | FIMISFLIIMAILSLKIRKS-----    | 179       |
| Mg-NoxA   | HMMLLCMLMYTTAHH-RIRQQ-----   | 167       |
| Fg-NoxA   | HIMLLCMLMFTSAHA-RIRQQ-----   | 171       |
| Cc-NoxA   | HFMLLIMVVMYTTAHQ-KIRKQ-----  | 168       |
| Lb-NoxA   | HFMLLIMVLMYSTAHQ-KIRKQ-----  | 168       |
| fPp-NoxA  | HFMLLCMVLMYTTAHH-KVRQQ-----  | 168       |
| Pg-NoxA   | HIMLFIMVLMYTTAST-KIRTQ-----  | 174       |
| Bd-NoxA   | HIMLIIMFFMYTSAKS-DVGTK-----  | 163       |
| Mg-NoxB   | YVMLIALMGMVFTSVE-KPRRA-----  | 164       |
| Fg-NoxB   | YVMLIALMGMVLTSMK-KPRRA-----  | 164       |
| Cc-NoxB   | WIMWLALGIMVWFAIE-KRRRA-----  | 175       |
| Lb-NoxB   | WIMTVSLGIMVFFASE-KRRRA-----  | 186       |
| fPp-NoxB  | WIMTAALAIMVWYAVE-KRRRA-----  | 176       |
| Pg-NoxB   | WIMTSLGIIVWYARE-KPRRA-----   | 170       |
| Bd-NoxB   | QVISVSFFLIFTSAME-AVRRK-----  | 148       |
| Hs-Nox2   | VVITLCLILIIITSSTK-TIRRS----- | 200       |
| Hs-Nox3   | LVISLALVIMTSSTE-FIRQA-----   | 198       |
| Hs-Nox1   | VIMTIALILMVTSAE-FIRRS-----   | 199       |
| Lg-Nox2   | VIIITLCLILIVSSSTE-TIRRW----- | 195       |
| Nv-Nox2A  | AVITLALILMLSSSTE-LIRRS-----  | 194       |
| Nv-Nox2B  | AVITLCLVVMVSSSTE-LIRRS-----  | 185       |
| Ci-Nox2   | VIIITLSLFFMVTSSLE-FIRRS----- | 211       |
| Sp-Nox2A  | AVLTLALILMFSSATE-FIRRS-----  | 212       |
| Sp-Nox2B  | AVLALTYILMFTSAE-FIR-Y-----   | 187       |
| Mb-Nox2   | VGITVPLILMVTASQ-QIRRS-----   | 186       |
| Hs-Nox4   | VCMVVVLFMLITASTY-AIRVS-----  | 185       |
| Nv-Nox4   | MGMMLVLLIMIAASTP-IVRNR-----  | 171       |
| Lg-Nox4   | LLMALILVLIIVTSSYK-HIRDS----- | 188       |
| Dd-NoxA   | HVVCIVMVLMYTSAVESIRRP-----   | 181       |
| Dd-NoxB   | HIMLLILILIVSSSMWIRRP-----    | 175       |
| Ng-NoxA   | NVLCIVMFIYAAASAKSYRRTK-----  | 175       |
| Os-rboh-C | VVMVVLMAIAFTLAQPWFRRNK-----  | LKDSN 189 |
| Os-rboh-G | VIMVVLMAIAYTLAHPWFRRSK-----  | LSDSN 189 |
| At-rboh-D | IVMVVLMIAFTLATPWFRRNK-----   | LNLPN 185 |
| Os-rboh-A | VIMVVCMIIAFTLATRWFRRSL-----  | VKLPR 187 |
| Os-rboh-B | VIMLVCMIIAFTLATRWFRRSL-----  | VKLPK 187 |



|            |                                                              |     |
|------------|--------------------------------------------------------------|-----|
| Os-rboh-D  | VAMVVLMTVSFTLATHPFRKGEKGGSGGGAAATV-----LPTVARLPS             | 203 |
| Os-rboh-H  | IVMVVLMVVSFTLATHRPLRKR-----APRPF                             | 247 |
| Os-rboh-E  | ILMIIMSFSFTLATHSFRRSV-----VKLPS                              | 188 |
| Os-rboh-F  | ILMILIMSFSFTLATHSFRRSV-----VKLPS                             | 188 |
| mPp-rboh-A | VIMLVIMI IAFLLATHWFRSL-----VKLPW                             | 190 |
| mPp-rboh-C | LIMVVMILAFLLATHWFRQSL-----VKLPW                              | 187 |
| mPp-rboh-B | ILMVVMI IAFLLATHWFRSM-----VKLPW                              | 187 |
| mPp-rboh-D | ILMVVMAIAMLLATHWIRSL-----VKFPW                               | 196 |
| Ps-rboh-B  | VILLVITCISFPLAAIPKFRQG-----                                  | 187 |
| Ps-rboh-C  | VILLVITCISFPLAAIPKFRQG-----                                  | 174 |
| Ps-rboh-A  | VAMLLCAAIAAPLC-LEKVRRG-----                                  | 177 |
| Hs-Duox1   | VVLLLILAIMYVFASHHFRRS-----                                   | 181 |
| Hs-Duox2   | VLLLVLAIMYVFASHHFRRS-----                                    | 181 |
| Lg-Duox1   | VILTLIIIVMYVFATEYGRRL-----                                   | 189 |
| Lg-Duox2   | VVVTIVIFIMYVFATQFARRNH-----                                  | 189 |
| Lg-Duox3   | VLLVVLCIMYVFATQTARSHI-----                                   | 189 |
| Dp-Duox    | VLLFIVMIIIFVFAHPIIRKKA-----                                  | 189 |
| Cb-Duox    | IALVTVMCIIVFALPCFIKRA-----                                   | 189 |
| Mg-NoxC    | L TALGLFYTLALLSMPQVRRWN-----                                 | 180 |
| Fg-NoxC    | ITALGLFWILCLLSIPQVRRWN-----                                  | 180 |
| Cm-NoxD2   | CALMAFLLAIVLLSLGSVRRRV-----                                  | 169 |
| Cm-NoxD1   | VVLMVLLVPLLGFGVETVRRKW-----                                  | 168 |
| Pt-NoxD    | IFLFWIFAGFFMTTLERVRRRTWG-----                                | 175 |
| An-Fre1    | FWILCVLLACVNYNGAIRTSTMPQRN-----WHYTSDRTGILAYACL PFLWLTGRNNIF | 331 |
| Sc-Fre1    | LIFVILTILSLSFGHNIKLPHPYDRPRWRRSMAFVSRRADLMAIALFPVVYLFGRNNPF  | 279 |

|           |                                                                  |     |
|-----------|------------------------------------------------------------------|-----|
| Dp-Nox5A  | -----YFELFYWTHF-LHYPFWALLILHGPH-----                             | 201 |
| Dp-Nox5B  | -----SFEVFWYTHL-LYIPFWVLLILHGPN-----                             | 205 |
| Hs-Nox5   | -----HFEVFWYTHL-SYLLVWLLLIFHGPN-----                             | 187 |
| Lg-Nox5A  | -----HFQVFWYTHI-LYVPFWILCLHATN-----                              | 195 |
| Lg-Nox5B  | -----HFEIFYYTHM-LYIPFWILCLIHASN-----                             | 196 |
| Dd-NoxC   | -----NFELFYSSH-LFIFGVVLLILHGTMGWIRPPT-----                       | 211 |
| Mg-NoxA   | -----SFETFWYTHH-LFIPFGLGYHTVGC FVRD TVE-----                     | 200 |
| Fg-NoxA   | -----SFETFWYTHH-LFIPFGLGYHTVGC FVRD TPE-----                     | 204 |
| Cc-NoxA   | -----CFEAFWYTHH-LAFFFMLGLYTHATGCFVRD SVH-----                    | 201 |
| Lb-NoxA   | -----CFEAFWYTHH-LAFFFMLGLYTHATGCFVRD TVD-----                    | 201 |
| fPp-NoxA  | -----CFEAFWYTHH-LAFFFFIALWTHADGCFVRD STN-----                    | 201 |
| Pg-NoxA   | -----CFEAFWYTHH-LAFFWALCLYTHAAGCFVRGALP-----                     | 207 |
| Bd-NoxA   | -----NFEYFWYTHH-LFVPPFYFCLFFHSFGCFVKSST-----                     | 195 |
| Mg-NoxB   | -----NYERFWYTHH-FFIVFFFWSIHGAFCMIQPDFA-----                      | 197 |
| Fg-NoxB   | -----NFERFWYTHH-MFIVFFFWSIHGAFCMIQPDVA-----                      | 197 |
| Cc-NoxB   | -----HFERFWYSHH-LFIVFFINWQLHGMFCMIKPD RP-----                    | 208 |
| Lb-NoxB   | -----HFERFWYSHH-LFVVFFINWQLHGMFCMIKPD RP-----                    | 219 |
| fPp-NoxB  | -----NFEKFWYTHH-LFIVFFLNWQLHGMFCMIQPDRE-----                     | 209 |
| Pg-NoxB   | -----KFERFWYSHH-LFIVFFSAWQLHGMFCMIQPD RP-----                    | 203 |
| Bd-NoxB   | -----YFEIFWYTHH-LFLVFFGALLMHGSFCFIKGD SG-----                    | 181 |
| Hs-Nox2   | -----YFEVFWYTHH-LFVIFFIGLAIHGAERIVRGQTA-----                     | 233 |
| Hs-Nox3   | -----SYELFWYTHH-VFIVFFLSLAIHGTGRIVRGQTQ-----                     | 231 |
| Hs-Nox1   | -----YFEVFWYTHH-LFIFYILGLGIHGIGGIVRGQTE-----                     | 232 |
| Lg-Nox2   | -----YFELFWYTHH-LFIIPLIGFVIHG IQGIIRHQ TN-----                   | 228 |
| Nv-Nox2A  | -----YFEVFWFNHH-CFVIFYIGLV LHGVQGIIRYQS-----                     | 226 |
| Nv-Nox2B  | -----YFEVFWYSHH-LFIIFFAGLVAHGCGEILRYQT-----                      | 217 |
| Ci-Nox2   | -----YFEVFWYTHH-LFIVFYGFLVVHGISMQRGQTP-----                      | 244 |
| Sp-Nox2A  | -----YFETFWYTHH-LFIVYFAMLLAHGVGGIIRSQT-----                      | 244 |
| Sp-Nox2B  | -----YFETFWLTHH-LFVIYYAMLTHMGGVVYKYQT-----                       | 219 |
| Mb-Nox2   | -----YFELFWYTHH-LFVVYVCLCLHGYSGFVERQDNPD TYPISLDRGVCTSRDDVL----- | 239 |
| Hs-Nox4   | -----NYDIFWYTHN-LFFVYMLLTLHVSGLLKYQTNLDTHPPGC-----               | 226 |
| Nv-Nox4   | -----SYEVFWYTHH-AFIAFYMLAVHGLGGVIKHQTNLAAHTPGCK-----             | 213 |
| Lg-Nox4   | -----NYEVFYTHR-LFIFYGLLIHIAVK-----                               | 213 |
| Dd-NoxA   | -----MFEVFWYTHH-LFVFFGLLVHGLHSILEP-----                          | 211 |
| Dd-NoxB   | -----MFEIFWYVHH-LFIPFYILLCFHGYSKILK KD-----                      | 206 |
| Ng-NoxA   | -----NFTVFWYAHH-LFVFFVLLLVHG-----                                | 198 |
| Os-rboh-C | PLKKMTGFNAFWYTHH-LFVIVYTLFVHGTCLYLSRKWY-----                     | 228 |

|            |                                                               |     |
|------------|---------------------------------------------------------------|-----|
| Os-rboh-G  | PLKRLSGFNMFWYSHH-LFVIVYIAFVVHGVCLYINRTWW-----                 | 228 |
| At-rboh-D  | FLKKLTGFNAFWYTHH-LFIIIVYALLIVHGIKLYLTKIWIY-----               | 224 |
| Os-rboh-A  | PFDKLTGFNAFWYSHH-LFIIIVYIALIVHGECLYLIIHVWY-----               | 226 |
| Os-rboh-B  | PFDKLTGFNAFWYSHH-LFIIIVYISLVIHGEWYLRIRIWIY-----               | 226 |
| Os-rboh-D  | PFNRLAGFNAFWYSHH-LLGIVYALLIAHGYPFLVRRWY-----                  | 242 |
| Os-rboh-H  | PLGHLAGFNAFWYSHH-LLIVVYLLLLVHGWFMFLVTKWH-----                 | 286 |
| Os-rboh-E  | PLHHLAGFNAFWYAHH-LLVLAYVLLVVHSYFIFLTREWY-----                 | 227 |
| Os-rboh-F  | PLHHLAGFNAFWYAHH-LLVIAIYILLVLHSYFIFLTKQWY-----                | 227 |
| mPp-rboh-A | PFHRLMGFNAFWYSHH-LFVIVYALLLHGTKLLLPSPWH-----                  | 229 |
| mPp-rboh-C | PFHRLTGFNAFWYSHH-LFAIVYAFLLHGSKLLLPNSIL-----                  | 226 |
| mPp-rboh-B | PLQRLTGFNAFWYSHH-LFVIVYALLMVHSIKLLLAGPWY-----                 | 226 |
| mPp-rboh-D | PLHRLTGFNTFWYSHH-LFVIVYALLVHSIKLLLAGSWY-----                  | 235 |
| Ps-rboh-B  | -----KFNVFWYSHM-LFGPFLVLVCFHGACSWLAR-----                     | 217 |
| Ps-rboh-C  | -----KFNLFWYSHM-LFGPFLVVLAFHGATSWLAR-----                     | 204 |
| Ps-rboh-A  | -----KFNLFVWYSHM-LFIPFLVLMFHFARWVAA-----                      | 207 |
| Hs-Duox1   | -----FRGFWLTHH-LYILLYVLLIIHGSFALITQL-----                     | 210 |
| Hs-Duox2   | -----FRGFWLTHH-LYILLYALLIIHGSYALITQL-----                     | 210 |
| Lg-Duox1   | -----FNAFWFTHN-FYVFLYIFLILHGIIRLVQD-----                      | 218 |
| Lg-Duox2   | -----FTAFWLTHS-LYLTIVYPLTILHGIIVLVQA-----                     | 218 |
| Lg-Duox3   | -----FNLFWLTHK-LFIIIMYVVLVILHGASIIIVQK-----                   | 218 |
| Dp-Duox    | -----YNFFWMTHS-LYIVLYILSVLHGLGRLTAE-----                      | 218 |
| Cb-Duox    | -----YHAFRLTHL-LNIAFYALTILHGLPKLLDS-----                      | 218 |
| Mg-NoxC    | -----YEVFQLAHL-LMFPIIGLLAAHGTAAQLQYAMFG-----                  | 213 |
| Fg-NoxC    | -----YEVFQLGHL-LMFPIIGLMAHGTAAQLQWPMFG-----                   | 213 |
| Cm-NoxD2   | -----YRVFWASHVPLAILTYAALVFHGLRGGR-----                        | 197 |
| Cm-NoxD1   | -----FRLFWWTHRPIAVLVYICLVFHLRGGR-----                         | 196 |
| Pt-NoxD    | -----FRLFWVAHMISITCVPLLLIHTGIRGK-----                         | 203 |
| An-Fre1    | LWATNFDIQSFSTFHRHIAWACTLLAIVHSIGYSIILADYEDAYHEAWSHKPWYMG----- | 387 |
| Sc-Fre1    | IPITGLSFSTFNFYHKWSAYVCFMLAVVHSIVMTASGVKRGVVFQSLVRKFYFRWG----- | 334 |

\* \* \*

|          |                                                               |              |
|----------|---------------------------------------------------------------|--------------|
| Dp-Nox5A | -----                                                         |              |
| Dp-Nox5B | -----                                                         |              |
| Hs-Nox5  | -----                                                         |              |
| Lg-Nox5A | -----                                                         |              |
| Lg-Nox5B | -----                                                         |              |
| Dd-NoxC  | -----                                                         |              |
| Mg-NoxA  | -----PHSPFAGDEY-----WNHCIGYL                                  | 218          |
| Fg-NoxA  | -----AFSPFAGDEF-----WEHCIGYL                                  | 222          |
| Cc-NoxA  | -----PNLTSTFPFYS-----TENCIGYL                                 | 220          |
| Lb-NoxA  | -----PDYIPTFPFYS-----TEHCLGYL                                 | 220          |
| fPp-NoxA | -----AAIIDTFPFYN-----AEFCLGYE                                 | 220          |
| Pg-NoxA  | -----DHK-----AQCLGYN                                          | 217          |
| Bd-NoxA  | -----                                                         | TGKCKGYN 203 |
| Mg-NoxB  | -----PFCMS-----FGTSAIGV                                       | 210          |
| Fg-NoxB  | -----PFCTS-----IGSSAIGV                                       | 210          |
| Cc-NoxB  | -----PYCS-----FNTIGV                                          | 218          |
| Lb-NoxB  | -----PYCS-----SNTIGV                                          | 229          |
| fPp-NoxB | -----PFCT-----WNSIGV                                          | 219          |
| Pg-NoxB  | -----PYCS-----FNQIGV                                          | 213          |
| Bd-NoxB  | -----DPCR-----GGPM                                            | 189          |
| Hs-Nox2  | -----ESLAVHNITVCE-----QKISEWG-KIKECPIPQFAGNPPM                | 268          |
| Hs-Nox3  | -----DSLSLHNITFCR-----DRYAEWQ-TVAQCPVPQFSGKEPS                | 266          |
| Hs-Nox1  | -----ESMNESHPRKCA-----ESFEMWDRDSDHCRPRKFEHGHPPE               | 268          |
| Lg-Nox2  | -----VSS-HNPEKCY-----TRHDEWG-TSPDCKIPQFAGSSPK                 | 261          |
| Nv-Nox2A | -----NVDKHDPEIC-----MNHTLWYNHPKCEPPKFVPPFGMN                  | 260          |
| Nv-Nox2B | -----NMDKHDVPCR-----QENLATWGVKDPVLPPEFAAGAM                   | 254          |
| Ci-Nox2  | -----QSLTVHDPTRCS-----TIDPATWSQNN-CP-TPVFAGSPPM               | 279          |
| Sp-Nox2A | -----NLDHRDVFVCS-----ENLDVWGPTSAQCEDPVFKDGSAA                 | 279          |
| Sp-Nox2B | -----NVDEHDPVECM-----VDEETFQCVID-NPPLFAGTPGA                  | 253          |
| Mb-Nox2  | VSNGCASWNAVVSALANQNSSLTPNLCIPGGVDVGEEDAFCCPCRLVTQAVLQRGQAA    | 299          |
| Hs-Nox4  | ISLNR---TSSQNISLPEYFSEHFHEPFPEGFSGK- AEFTQHKFVKICMEEPFRQANFPQ | 282          |
| Nv-Nox4  | VPLNDSMDTPFNMTSLPLCREAEFAPDQPVYHKSNTQVYQKPYHTVYCK---CYHTGIPQ  | 271          |
| Lg-Nox4  | -----                                                         | E 214        |

|            |                                                            |     |     |
|------------|------------------------------------------------------------|-----|-----|
| Dd-NoxA    | -----                                                      | TS  | 213 |
| Dd-NoxB    | -----                                                      | PQ  | 208 |
| Ng-NoxA    | -----                                                      | KQ  | 200 |
| Os-rboh-C  | -----                                                      | KKT | 231 |
| Os-rboh-G  | -----                                                      | KQT | 231 |
| At-rboh-D  | -----                                                      | QKT | 227 |
| Os-rboh-A  | -----                                                      | RRT | 229 |
| Os-rboh-B  | -----                                                      | KRT | 229 |
| Os-rboh-D  | -----                                                      | LKT | 245 |
| Os-rboh-H  | -----                                                      | QRT | 289 |
| Os-rboh-E  | -----                                                      | KKT | 230 |
| Os-rboh-F  | -----                                                      | NRT | 230 |
| mPp-rboh-A | -----                                                      | ERT | 232 |
| mPp-rboh-C | -----                                                      | ERS | 229 |
| mPp-rboh-B | -----                                                      | KRT | 229 |
| mPp-rboh-D | -----                                                      | KRT | 238 |
| Ps-rboh-B  | -----                                                      | SS  | 219 |
| Ps-rboh-C  | -----                                                      | CS  | 206 |
| Ps-rboh-A  | -----                                                      | PQ  | 209 |
| Hs-Duox1   | -----                                                      | PR  | 212 |
| Hs-Duox2   | -----                                                      | PT  | 212 |
| Lg-Duox1   | -----                                                      | PL  | 220 |
| Lg-Duox2   | -----                                                      | PI  | 220 |
| Lg-Duox3   | -----                                                      | PL  | 220 |
| Dp-Duox    | -----                                                      | PN  | 220 |
| Cb-Duox    | -----                                                      | PK  | 220 |
| Mg-NoxC    | -----                                                      |     |     |
| Fg-NoxC    | -----                                                      |     |     |
| Cm-NoxD2   | -----                                                      | LW  | 199 |
| Cm-NoxD1   | -----                                                      | PW  | 198 |
| Pt-NoxD    | -----                                                      | PI  | 205 |
| An-Fre1    | -----VIAI IAMS VLLIHSVTWLRKRWYEVFLLSHIILAIVIIYALFQHTRPDGPQ |     | 438 |
| Sc-Fre1    | -----IVATILMSIIIFQSEKVFRRNGYEIFLLIHKAMNIMFIIAMYYHCHTLG     |     | 383 |

|          |                                                       |       |     |
|----------|-------------------------------------------------------|-------|-----|
| Dp-Nox5A | FWYWLVGPGALFIIILEKLLRLNRMTGKGRTFINYAILLPSS            | ----- | 243 |
| Dp-Nox5B | FWYWFIPGILFFIEG-TGRFRLRVTGKGRTFISSALLPSR              | ----- | 246 |
| Hs-Nox5  | FWKWLLVPGILFFLEK--AIGLAVSRMAAVCIMEVNLLPSK             | ----- | 226 |
| Lg-Nox5A | FWYWFIPGIIIFIIESLNRSKYIKKAAYGATYITNVYLLPYR            | ----- | 237 |
| Lg-Nox5B | FWKWFIAPLGILFFVESILRSKPMKLATHGRTFIKEVNLLPSG           | ----- | 238 |
| Dd-NoxC  | FWKWFIVPGFFYTVDR---SFRLFKRTHRVEVLDYCLKNER             | ----- | 249 |
| Mg-NoxA  | GWRWELWTGGFYLLER-----LYREIRARRETKITR-VVRHPYGEFFFLFFLL | ----- | 266 |
| Fg-NoxA  | GWRWELWTGGAYLLER-----LWREVRARRSTKITR-VVRHPY           | ----- | 259 |
| Cc-NoxA  | SWRFIIWPGIIYFGER-----VWREIRARRATRLSK-VLVHPSG          | ----- | 258 |
| Lb-NoxA  | SWRFIIWPGIIYFGER-----VWREIRARRATRLSK-VLVHPSG          | ----- | 258 |
| fPp-NoxA | SWRFIIWPGIIYFGER-----VWREVRARRATRLSK-VLVHPSG          | ----- | 258 |
| Pg-NoxA  | SVYVTVWSGLAYFCDR-----VFREIRGRGRSEISA-VLIHPSG          | ----- | 255 |
| Bd-NoxA  | TNYGTVPIFCVYIAER-----LLREYRRLPTVLSK-VIFHSGN           | ----- | 241 |
| Mg-NoxB  | FWQFWMYGGFVYMAER-----IAREIRGKHKTYISK-VIQHPSN          | ----- | 248 |
| Fg-NoxB  | FWQFWMYSGFCYLAER-----IAREVGRHRFTISK-VIQHPSN           | ----- | 248 |
| Cc-NoxB  | FWRYWLVGGVIWIWER-----ILREIRSRHRTHIHK-VIQHPSS          | ----- | 256 |
| Lb-NoxB  | FWRYWLVGGVIWISER-----VLREIRSRHRTYVSK-VIQHPSN          | ----- | 267 |
| fPp-NoxB | FWRYWLVGGVIFTFER-----ILREVRSRHRTYISK-VIQHPSN          | ----- | 257 |
| Pg-NoxB  | FWKYWLVGGTIFIWER-----VLREVRSRHKTYISK-VIQHPSN          | ----- | 251 |
| Bd-NoxB  | FWKFWVGSAAFYLIER-----LWREISGRRKTYIFK-VVQHPSK          | ----- | 227 |
| Hs-Nox2  | TWKWIVGPMFLYLCER-----LVRFWRSQQKVVTIK-VVTHPFK          | ----- | 306 |
| Hs-Nox3  | AWKWILGPVLYACER-----IIRFWRFQQEVVITK-VVSHPSG           | ----- | 304 |
| Hs-Nox1  | SWKWILAPVILYICER-----ILRFYRSQQKVVTIK-VVMHPSK          | ----- | 306 |
| Lg-Nox2  | SWIWLIPVIFIIFIER-----GIRFYRSQQVVITK-VVKHPSN           | ----- | 299 |
| Nv-Nox2A | TWRVWVGPMLYCIER-----LIRFVRSQAQIHK-VVKHPSN             | ----- | 298 |
| Nv-Nox2B | TWKIVLLPMVIFYLER-----CLRFWRSQQKVVKVVVKHPSR            | ----- | 293 |
| Ci-Nox2  | TWKWVIAPMVLYVIER-----IIRLVRFNQQVEVLK-VIKHPSR          | ----- | 317 |
| Sp-Nox2A | SYKWVSGPLFIYLLER-----TIRFWRSQQTVTLTK-VVKHQSK          | ----- | 317 |
| Sp-Nox2B | SWKWCVTPLCVYFLER-----ILRMIRTWPDVTIVQ-VVQHPSK          | ----- | 291 |

|            |                                                              |     |
|------------|--------------------------------------------------------------|-----|
| Mb-Nox2    | TWVWVIGPLILYLIER-----LYRWYKSQTRRLRILKVVHKHDS-----            | 338 |
| Hs-Nox4    | TWLWISGPLCLYCAER-----LYRYIRSNKPVTIIS-VMShPSD-----            | 320 |
| Nv-Nox4    | SWKLLILPLSLYLIDR-----LIRVVRGYQEVTVIK-VVNHPG-----             | 309 |
| Lg-Nox4    | SWVWVIVPLILYIVDG-----IIRIFN-RKTTTITK-ITAYTGD-----            | 251 |
| Dd-NoxA    | FWKWVIGPCALYIVER-----LIRLLRSKKTMLIQ-ARIHPSR-----             | 251 |
| Dd-NoxB    | SWMWIIAPFILYSIER-----LIRIARSKKRVILEK-AIMHPSK-----            | 246 |
| Ng-NoxA    | FWAWFFIPMALYALER-----VMRNLRGSEMTIVKR-VHCLASR-----            | 238 |
| Os-rboh-C  | TWMYLAVPVVLYVSER-----ILRLFRSH-DAVGIQKVAIYPG-----             | 268 |
| Os-rboh-G  | TWMYLAIPILLYAGER-----IFRALRSHGFTTVRIEKVAIYPG-----            | 270 |
| At-rboh-D  | TWMYLAVPILLYASER-----LLRAFRSS-IKPVKMIKVAIYPG-----            | 265 |
| Os-rboh-A  | TWMYLSVPVCLYVGER-----ILRFFRSG-SYSVRLKVAIYPG-----             | 267 |
| Os-rboh-B  | TWMYLAVPVCLYVGER-----TLRFFRSG-SYSVRLKVAIYPG-----             | 267 |
| Os-rboh-D  | TWMYISVPLMLYVGER-----MLRALRSN-AYAVKILKVCLLPG-----            | 283 |
| Os-rboh-H  | TWMYIAVPLMLYVGER-----TLRAFRSK-AYAVKILKVCLLPG-----            | 327 |
| Os-rboh-E  | TWMYLIVPVLFYACER-----TIRKVREN-NYRVSIVKAAIYPG-----            | 268 |
| Os-rboh-F  | TWMLAVPVLFYSCER-----TIRRVRES-SYGVTVIAKAAIYPG-----            | 268 |
| mPp-rboh-A | TWMYIAVPLLYAGER-----LLRMYRTN-SSKVDVIAKAAIYSG-----            | 270 |
| mPp-rboh-C | TWYIAVPLLYAGER-----FLRMYRTN-SSKVDVIAKAAIYTG-----             | 267 |
| mPp-rboh-B | TWMYIAIPLLYAGER-----MLRLYRTN-SSKVEIVKAAIYTG-----             | 267 |
| mPp-rboh-D | IWMYTAVPLVLYASER-----FLRLYRTN-YSKVEVVKAAVYTG-----            | 276 |
| Ps-rboh-B  | SYIWIPTPFLYLIER-----RFRYAKMF-AAPVRIMEAMELD-----              | 256 |
| Ps-rboh-C  | AYIWIPTPFLMYLIER-----RFRYAKMF-AAPVRIMEAMELD-----             | 243 |
| Ps-rboh-A  | AHYWVLPPIVIYLVEK-----RYRMTQMF-GGQTQIAHVQLSK-----             | 246 |
| Hs-Duox1   | FHIFFLVPAIIYGGDK-----LVLSRKKVEISVVKAEILPSG-----              | 250 |
| Hs-Duox2   | FHIYFLVPAIIYGGDK-----LVLSRKKVEISVVKAEILPSG-----              | 250 |
| Lg-Duox1   | FPYFPLGPLVVFVLDK-----MVSLSRNKVEIVVKAELPSG-----               | 258 |
| Lg-Duox2   | FPYFLGGLVLFVFDK-----LASLSRNVEIRVKVSI LPSD-----               | 258 |
| Lg-Duox3   | FFAYFIGPAALFTLTK-----MISLSRKKTEINIVKAINLPSD-----             | 258 |
| Dp-Duox    | FWYFLIGPAIYVTLDK-----IISLRTKFMGLDIIETVLLPSD-----             | 258 |
| Cb-Duox    | FGYVVLGPVIFVIDR-----IIGLMQYKKEIVSAEILPSD-----                | 258 |
| Mg-NoxC    | --YWLAVPTILVLTERR-----LVRVGTGFHRIPASLKVLDDET-----            | 250 |
| Fg-NoxC    | --YFLAFPTLLVLTERR-----TVRVGLGFHRIKATMKVLDKET-----            | 250 |
| Cm-NoxD2   | SVYFFGLPVVLYILDR-----LYHSFAAAFTPHRVLVELSHKNS-----            | 239 |
| Cm-NoxD1   | TVYFFAGPVFLYIIDR-----LYQLSRATVTPRRILVLSLAQANS-----           | 238 |
| Pt-NoxD    | LMYFASPLAIYIVDS-----FMRRMMYKTVQAGVRFQAFGGEGGGGGE-----        | 250 |
| An-Fre1    | WNPYLRTVVAIWMFDR-----IFRIARIAYNLQIRFSELQISLSPSSSVTYNPDS----- | 488 |
| Sc-Fre1    | WGWIIWSMAGILCFDR-----FCRIVRIIMNGGLKTATLSTTDDS-----           | 423 |

|          |                                                            |     |
|----------|------------------------------------------------------------|-----|
| Dp-Nox5A | -----VTHLVCRKPP-NFNFA---GDYVYLNIPAIAS-----YEW              | 275 |
| Dp-Nox5B | -----VTHLVIRKPE-NFNFP---GDYVFKIPAITA-----SEW               | 278 |
| Hs-Nox5  | -----VTHLLIKRPP-FHYRP---GDYLYLNIPAIAR-----YEW              | 258 |
| Lg-Nox5A | -----VIHLVISRPP-KWRYRP---GDYVFIQIPAIK-----YEW              | 269 |
| Lg-Nox5B | -----VTHLVISRPP-NDFKP---GDYLFIQIPMLAK-----YEW              | 270 |
| Dd-NoxC  | -----VINLTFKPP-SFYKP---GQYLLINVPHISK-----LQW               | 281 |
| Mg-NoxA  | FGPSMVGFSVLIRSDADVVEIQFNKPS--FKYKA---GQWLFLQVPSVSK-----YQW | 314 |
| Fg-NoxA  | -----DVVEIQFNKPS--FKYKA---GQWLFLQVPSLSK-----YQW            | 291 |
| Cc-NoxA  | -----AMELRIVKP--FKYTA---GQWLFLQVPELSR-----FQW              | 288 |
| Lb-NoxA  | -----AMELRIVKPS--FKYTA---GQWLFIQIPELSR-----FQW             | 289 |
| fPp-NoxA | -----AMELRIVKPS--FKYVA---GQWLFIQVPEVSK-----FQW             | 289 |
| Pg-NoxA  | -----TVEIRMLKAG--FKYVP---GQWIFFQMPEVSR-----FQW             | 286 |
| Bd-NoxA  | -----TMELRIEKPS--FQYMP---GQYLFLNIPSISA-----FQW             | 272 |
| Mg-NoxB  | -----VCEIQKKEH--TKTRA---GQYIFCCPEVSV-----WQY               | 279 |
| Fg-NoxB  | -----VCEIQKKEH--TKTRA---GQYIFLCCPAVSL-----WQY              | 279 |
| Cc-NoxB  | -----VMEVQIKKEK--TTTRA---GQYIFLSCPEISY-----FQW             | 287 |
| Lb-NoxB  | -----VMELQIKKEK--TTTRA---GQYIFLSCPEISY-----FQW             | 298 |
| fPp-NoxB | -----VMELQIKKEK--TTTRA---GQYIFLSCPEISY-----FQW             | 288 |
| Pg-NoxB  | -----VCEVQIKKEK--TTTRA---GQYIFLNCPEVSY-----WQW             | 282 |
| Bd-NoxB  | -----VVEVQIKKNG--WKMQA---GQYIFICPEIGL-----FEW              | 258 |
| Hs-Nox2  | -----TIELQMKKKG--FKMEV---GQYIFVKCPKVS-----LEW              | 337 |
| Hs-Nox3  | -----VLELHMKRG--FKMAP---GQYILVQCPAISS-----LEW              | 335 |
| Hs-Nox1  | -----VLELQMNKRG--FSMEV---GQYIFVNCPSISL-----LEW             | 337 |
| Lg-Nox2  | -----VFELQIRKKS--FYADP---GQYIFLHCPSISL-----LEW             | 330 |
| Nv-Nox2A | -----VIEIKMKKAG--FRPEV---GQYIFLQCPKISK-----LEW             | 329 |

|            |                                                    |     |
|------------|----------------------------------------------------|-----|
| Nv-Nox2B   | -----VVEIQMKKPG--FVCEA---GQYVFLQVPKISQ-----LEW     | 324 |
| Ci-Nox2    | -----VLEIQMRKNG--FFAEV---GQYVFMCPQLSQ-----LEW      | 348 |
| Sp-Nox2A   | -----VIELQMKKKG--FKMEA---GQYIFLKCPISHS-----VQW     | 348 |
| Sp-Nox2B   | -----VIELRMKKQG--FKMLP---GQYIFLKCPISK-----VQW      | 322 |
| Mb-Nox2    | -----VPVMEIQFQK--VPTKA---GQYVFINCPKINS-----LEW     | 369 |
| Hs-Nox4    | -----VMEIRMVKEN--FKARP---GQYITLHCPSVSA-----LEN     | 351 |
| Nv-Nox4    | -----VIELHMKKSG--FYAEP---GQFVYVRCHSVAR-----FEW     | 340 |
| Lg-Nox4    | -----VIELQLKCDG--LKAIP---GQYVLLKCPRISS-----FEW     | 282 |
| Dd-NoxA    | -----VIEVRMKTER--FKYKP---GQYLFLNCPTIAQ-----NEW     | 282 |
| Dd-NoxB    | -----VLELRMKRDNDNFNFKP---GQYLFLNCPSIAY-----HEW     | 279 |
| Ng-NoxA    | -----VIHLELEKPS--FRYES---GQYCFLNCPMISQ-----HEW     | 269 |
| Os-rboh-C  | -----NVLALYMSKPP--GFRYR---SGQYIFIKCTAVSP-----YEW   | 301 |
| Os-rboh-G  | -----NVLAIHMTKPH--GFKYK---SGQYIYVNCG-----296       |     |
| At-rboh-D  | -----NVLSLHMTKPG--GFKYK---SGQFMLVNCRAVSP-----FEW   | 298 |
| Os-rboh-A  | -----NVLTLQMSKPP--TFRYK---SGQYMFVQCPAVSP-----FEW   | 300 |
| Os-rboh-B  | -----NVLTLQMSKPP--TFRYK---SGQYMFVQCPAVSP-----FEW   | 300 |
| Os-rboh-D  | -----NVLITITMSKPY--GFRYR---SGQYIFLQCPITISP-----FEW | 316 |
| Os-rboh-H  | -----NVLITITMSKPY--GFRYR---SGQYIFLQCPITISP-----FEW | 360 |
| Os-rboh-E  | -----NVLSLHMKKPP--GFKYK---SGMYLFLVCKPDVSP-----FEW  | 301 |
| Os-rboh-F  | -----NVLSIHMKKPS--SFKYK---SGMYMFVCKPDVSP-----FEW   | 301 |
| mPp-rboh-A | -----NVLAIHMSKPE--GFKYK---SGMYLFLQCPPEISS-----FEW  | 303 |
| mPp-rboh-C | -----NVLAIHMSKPE--GFKYK---SGMYLFLQCPPEISS-----FEW  | 300 |
| mPp-rboh-B | -----NVLAIHITKPK--GFKYK---SGMYLFLQCPQISS-----FEW   | 300 |
| mPp-rboh-D | -----NVLAIHMTKPA--GFKYK---SGMYLFLQCPAISS-----FEW   | 309 |
| Ps-rboh-B  | -----GTVALFMEKPR--RFVYR---PGMYMFVNCPLISS-----HEW   | 289 |
| Ps-rboh-C  | -----STVALFIEKPR--RFVYR---PGMYLYINCPQISS-----HEW   | 276 |
| Ps-rboh-A  | -----EAVAVFMRKPK--AFSKRQRFPGMYVFNVTISK-----FEW     | 283 |
| Hs-Duox1   | -----VTHLRFQRPQ--GFEYKS---GQWVRIACLALGT-----TEY    | 282 |
| Hs-Duox2   | -----VTYLQFQRPQ--GFEYKS---GQWVRIACLALGT-----TEY    | 282 |
| Lg-Duox1   | -----VTNLVFKRPL--NFDYKS---GQWVRIACLALGT-----SEY    | 290 |
| Lg-Duox2   | -----VTELVFRPPA--NFDYRS---GQWVRIACLALGT-----GEY    | 290 |
| Lg-Duox3   | -----VTMLFQRPP--KFEYKS---GQWVRIACLALGT-----NEY     | 290 |
| Dp-Duox    | -----VLKVKFYRPP--NFKYLS---GQWVRIACLALGT-----EEF    | 290 |
| Cb-Duox    | -----IIYIEFRRPR--TFQYKS---GQWITVSSPSISCTF-----NES  | 292 |
| Mg-NoxC    | -----ELRATIPSER--IWKYQA---GQWAYLQVPTISM-----WQW    | 282 |
| Fg-NoxC    | -----EVTAIIPSER--LWKYKA---GQYIFLQVPKISF-----FQW    | 282 |
| Cm-NoxD2   | -----NVVRLVLERRG--RKFVA---GQYFKLAWKFHWCSSLAVAGEW   | 277 |
| Cm-NoxD1   | -----NIVKLSVERRN--AVYLP---GQYFKIMIIDTRKGGCMPADAW   | 276 |
| Pt-NoxD    | -----KVELILRSSA--YKYRP---GQYAEIQPELSR-----YEW      | 282 |
| An-Fre1    | -----DLIMIDTEAPP--HLALKP---GQHYFISQPLSVH-----CLES  | 522 |
| Sc-Fre1    | -----NVIKISVKKPK--FFKYQVG--AFAYMYFLSPKSAWFYS---FQS | 461 |

|          |                                                               |     |
|----------|---------------------------------------------------------------|-----|
| Dp-Nox5A | HPFTISSAPELP-----DLIWFHIRGVGGWTKNLYEYFKQEIKQY-----EFEHSL      | 323 |
| Dp-Nox5B | HPFTISSAPELP-----DVMWLHIRCAGGWTNKLIDYFEREQAKLCLKQSAQNQQHNG    | 331 |
| Hs-Nox5  | HPFTISSAPEQK-----DTIWLHIRSQGQWTKNLYESFK-----292               |     |
| Lg-Nox5A | HPFTISSAPEQE-----GTFWLHIRSAGHWTKNLYDYFDSYDPNTY-----310        |     |
| Lg-Nox5B | HPFTISSAPEME-----GFIWLHIRSAGYWTKSLDYDFFEKYGSDQR-----311       |     |
| Dd-NoxC  | HPFTMTSSP-LE-----DKIYVHIRVTGNWTKKLFWRWLSIKKQLQQ-----321       |     |
| Mg-NoxA  | HPFTITSCPYD-----PYVSVHVRQVGDFTKALGDATGAGAAQAKLYEG-----358     |     |
| Fg-NoxA  | HPFTITSCPDF-----PYVSVHVRQVGDFTRELGDALGAGAAQAKLYDD-----335     |     |
| Cc-NoxA  | HPFTITSAPED-----PYVSVHIRQVGDFTNALGERLGVGPAAVASMTKAAVKGAEK     | 340 |
| Lb-NoxA  | HPFTITSAPED-----PYVSIHIRQVGDFTRGLGDRLGVGSPDKMSG-----331       |     |
| fPp-NoxA | HPFTITSAPED-----PYVSVHIRQVGDFTQALGDRVAGAGPSVVAAMTKAAMIGSEK    | 341 |
| Pg-NoxA  | HPFTISSAPDD-----PYISIHVRQVGDFTKAVGTRLGATPQLMATLNQPSSE-----333 |     |
| Bd-NoxA  | HPFTISSPEE-----GFVSIHIRIVGDWTKNAAKMLGCYEQDIEKR-----314        |     |
| Mg-NoxB  | HPFTLTSAPEE-----DYISIHMRVVGDFTRGVSKALGCDWDRK---GDASKVV---325  |     |
| Fg-NoxB  | HPFTLTSAPEE-----DYISIHMRVVGDFTRKELAKSLGCDWSKKKDGADASKVV---328 |     |
| Cc-NoxB  | HPFTLTSAPEE-----DFISVHIRVAGDWTAFSKALGCDFERK---KKGDD---331     |     |
| Lb-NoxB  | HPFTLTSAPEE-----DYISVHIRVVGDFTRQALAKAMGCDFEKK---GKEETPA---344 |     |
| fPp-NoxB | HPFTLTSAPEE-----DYISVHIRIVGDFTRELAAGVCDVDFSK---EKGVEA---333   |     |
| Pg-NoxB  | HPFTLTSAPEE-----DYISVHIRVVGDFTRMEFAEALGCDVDFSRN---KEKSN---326 |     |
| Bd-NoxB  | HPFTLTSAPHE-----EFLSIHIRVVGDWTEKFAERVGCRFGGS-----297          |     |
| Hs-Nox2  | HPFTLTSAPEE-----DFFSIHIRIVGDWTEGLFNACCG---DKQE-----375        |     |

|            |                                                              |     |
|------------|--------------------------------------------------------------|-----|
| Hs-Nox3    | HPFTLTSAPQE-----DFFSVHIRAAGDWTAAALLEAFGA--EGQA-----          | 373 |
| Hs-Nox1    | HPFTLTSAPEE-----DFFSIHIRAAGDWTENLIRAFEQ--QYS-----            | 374 |
| Lg-Nox2    | HPFTLTSAPGE-----ETITVHVRRVGDWTEKLAKSCHV--DEGE-----           | 368 |
| Nv-Nox2A   | HPFTLTSAPEE-----DTFSVHIRIVGDWTDGLAKLGGY--KGQK-----           | 367 |
| Nv-Nox2B   | HPFTLTSAPEE-----DYFSLHIRVVGWNTDLANQLG--AGNQ-----             | 361 |
| Ci-Nox2    | HPFTLTSAPEE-----DYFSIHVRIVGDWTTGLSKVLGADEAGNE-----           | 388 |
| Sp-Nox2A   | HPFTLTSAPEE-----DHFSVHIRVVGWTRDLFKAMGA--DKPE-----            | 386 |
| Sp-Nox2B   | HPFTLTSAPEE-----DYFSLHIRVVGWTDDELAVKMGAA--DQAE-----          | 360 |
| Mb-Nox2    | HPITLTSCEPEL-----DYVSVHIRLVGDWTTKLADACGF--YEDN-----          | 407 |
| Hs-Nox4    | HPFTLTMCPTETK-----ATFGVHLKIVGDWTERFRD--LLLPPSSQDSEI-----     | 395 |
| Nv-Nox4    | HPFTLTKCPSSKD-----DSFSIHVKRTGDWTKSLSDQKPLLAALDDSGS-----      | 385 |
| Lg-Nox4    | HPYSITKCPDKSS-----SGFNLCLRHKGDWSGNIHK-----AFNTE-----         | 319 |
| Dd-NoxA    | HPFTITSAPEE-----DFVSCHINNVGNWTKLSTLLNPDKMGIVQEN-----         | 326 |
| Dd-NoxB    | HPFTITSAPDD-----PFISVHINI VGNWTRKLFKLLNPDNKLGLIQED-----      | 323 |
| Ng-NoxA    | HPFTISSAPEE-----EFLQFHIRCVGDWNTLMDVFNPAAQRP--TVEIN-----      | 312 |
| Os-rboh-C  | HPFSITSAPGD-----DYLSVHIRTRGDWTSRLRTVFSEACRPPTGESGLLRADLS     | 353 |
| Os-rboh-G  | -----EICRPPMNGQSGLLRADCM                                     | 315 |
| At-rboh-D  | HPFSITSAPGD-----DYLSVHIRTLDGWTRKLRVTFSEVCKPPTAGKSGLLRADGG    | 350 |
| Os-rboh-A  | HPFSITSAPGD-----DYL SIHVRLGDWTRKRVFAAAACEPPAGGKSGLLRADET     | 352 |
| Os-rboh-B  | HPFSITSAPGD-----DYL SIHVRLGDWTRKRVFAAAACEPPVGGKSGLLRADET     | 352 |
| Os-rboh-D  | HPFSITSAPGD-----DYL SVHIRTNGDWTQELKRIFVENYFPHLNRRASFSELGA    | 368 |
| Os-rboh-H  | HPFSITSAPGD-----DYISVHIQTRGDWTQELKRIFVENYFVSPVRRASFALGM      | 412 |
| Os-rboh-E  | HPFSITSAPGD-----DYL SVHIRTLDGWTTTELRLNFGKACEAQVTSKKATLSRLET  | 353 |
| Os-rboh-F  | HPFSITSAPGD-----DYL SVHIRTLDGWTTTELRLNFGKACEAQVSSKKATLARLET  | 353 |
| mPp-rboh-A | HPFSITSAPED-----PFLSVHIRTLDGWTEMMKIFADACGGRMRLQTVNNGFIL      | 355 |
| mPp-rboh-C | HPFSITSAPED-----PFLSVHIRTLDGWTAELKRIFSDACGGRMRLQTVNNG--L     | 350 |
| mPp-rboh-B | HPFSITSAPGD-----PFLSVHIRTLDGWTAEMKIFSEACGGRTCLQTINNG--L      | 350 |
| mPp-rboh-D | HPFSITSAPDD-----PFLSVHIRTLDGWTEMRKIFSDSLGGKTRLQAINDYG--L     | 359 |
| Ps-rboh-B  | HPFTISSAPGD-----NYISVHIRVCGDWTQALARVIADCHERKVL-----          | 330 |
| Ps-rboh-C  | HPFTISSAPGD-----NYISIHIRVCGDWTAMARVIADCHACNLQ-----           | 317 |
| Ps-rboh-A  | HPFTISSAPED-----KFISLHIQRSGDWTRALYDNLQQHQASRVEDQGSPTS---     | 332 |
| Hs-Duox1   | HPFTLTSAPHE-----DTLSLHIRAAGPWTTRLEIYSAPTGDRC-----            | 322 |
| Hs-Duox2   | HPFTLTSAPHE-----DTLSLHIRAVGPWTTRLEIYSSPKGNCG-----            | 322 |
| Lg-Duox1   | HPFTLTSAPQE-----ENLSLHIRAVGPWTTNIRRVYDINNIVSE-----           | 330 |
| Lg-Duox2   | HPFTLTSAPHE-----ENLSLHIRAVGPWTKNLRKIYEFYSIGN-----            | 329 |
| Lg-Duox3   | HPFTLTSAPHE-----DTLKVHIRALGPWTWNIRQTFDLENLKD-----            | 329 |
| Dp-Duox    | HSFTLTSAPHE-----NFLSCHIKAQGPWTWKL RNYFDPSNPNK-----           | 330 |
| Cb-Duox    | HAFSIASSPQD-----ETVKLYIKAVGPWTWKL RSELLR--AQNTG-----         | 331 |
| Mg-NoxC    | HPFTISVCGVK-----EMRMHIKT DGNWTRGLRDLAKDAPQG-----             | 319 |
| Fg-NoxC    | HPFTVSFCRGN-----KMMLHIKT DGNWTAKL RELGGDS-----               | 316 |
| Cm-NoxD2   | HPFTVASSPLLDK-----DRI IFFIAATGKWTNALRALALQQHQHQHDENLEHASSTSP | 331 |
| Cm-NoxD1   | HPFTAASAPSCDS-----DRI TFYIAAVGKWT RRLHSLA-----EAAVAEAATTTA   | 322 |
| Pt-NoxD    | HPFTIASAPNSD-----NTVSFCIKALGRWTTNGLFDLADTFQGGDVEEPK-----     | 327 |
| An-Fre1    | HPFALGAYAQAASSRSLKEKSRLTFYIRPYNGWTKTLRDRCSRAKN-----          | 567 |
| Sc-Fre1    | HPFTVLSERHRDPNNP---DQLTMYVKANKGITRVL LSKVLSAPNHTVD-----      | 507 |

|          |                                                                    |     |
|----------|--------------------------------------------------------------------|-----|
| Dp-Nox5A | RPASPFVSSDQSAFQTNV SFGNQSATIASAKNATENQSPFGWTKTYRPNPQISITLSEV       | 383 |
| Dp-Nox5B | GAGEPACRHCQRILGN DASFSTQN--IMKGVRRRLTRTF SNKNPVDKYDQLES--CRM TLRPL | 389 |
| Hs-Nox5  | --ASDPLGR-----GSKRLSRSVTMRKSQRSSK-----                             | 318 |
| Lg-Nox5A | --QYGTFNKGFG-----LDVMEAGGTIEEGTYRRLSSTGNTD-----                    | 345 |
| Lg-Nox5B | --RKSTITGQIN-----KAFHDGLDKIERG--I KEVSTSFTHR-----                  | 345 |
| Dd-NoxC  | -----QQQLYNNIKQQNVLPDGSNFIIN-----                                  | 344 |
| Mg-NoxA  | -----                                                              |     |
| Fg-NoxA  | -----                                                              |     |
| Cc-NoxA  | -----                                                              |     |
| Lb-NoxA  | -----                                                              |     |
| fPp-NoxA | -----                                                              |     |
| Pg-NoxA  | -----                                                              |     |
| Bd-NoxA  | -----                                                              |     |
| Mg-NoxB  | -----                                                              |     |
| Fg-NoxB  | -----                                                              |     |
| Cc-NoxB  | -----                                                              |     |
| Lb-NoxB  | -----                                                              |     |

|            |                                                               |     |
|------------|---------------------------------------------------------------|-----|
| fPp-NoxB   | -----                                                         |     |
| Pg-NoxB    | -----                                                         |     |
| Bd-NoxB    | -----                                                         |     |
| Hs-NoxB    | -----                                                         |     |
| Hs-NoxB    | -----                                                         |     |
| Hs-NoxB    | -----                                                         |     |
| Lg-NoxB    | -----                                                         |     |
| Nv-NoxB    | -----                                                         |     |
| Nv-NoxB    | -----                                                         |     |
| Ci-NoxB    | -----                                                         |     |
| Sp-NoxB    | -----                                                         |     |
| Sp-NoxB    | -----                                                         |     |
| Mb-NoxB    | -----                                                         |     |
| Hs-NoxB    | -----                                                         |     |
| Nv-NoxB    | -----                                                         |     |
| Lg-NoxB    | -----                                                         |     |
| Dd-NoxB    | -----                                                         |     |
| Dd-NoxB    | -----                                                         |     |
| Ng-NoxB    | -----                                                         |     |
| Os-rboh-C  | KGITD-----                                                    | 358 |
| Os-rboh-G  | S-ME-----                                                     | 318 |
| At-rboh-D  | D-----                                                        | 351 |
| Os-rboh-A  | T-----                                                        | 353 |
| Os-rboh-B  | T-----                                                        | 353 |
| Os-rboh-D  | TE-----                                                       | 370 |
| Os-rboh-H  | AE-----                                                       | 414 |
| Os-rboh-E  | TVVADAQT-----                                                 | 361 |
| Os-rboh-F  | TIIADGLK-----                                                 | 361 |
| mPp-rboh-A | VGHLTYRS-----                                                 | 363 |
| mPp-rboh-C | SGELTL-----                                                   | 356 |
| mPp-rboh-B | SGELTL-----                                                   | 356 |
| mPp-rboh-D | SGELTL-----                                                   | 365 |
| Ps-rboh-B  | -----                                                         |     |
| Ps-rboh-C  | -----                                                         |     |
| Ps-rboh-A  | -----                                                         |     |
| Hs-Duox1   | -----                                                         |     |
| Hs-Duox2   | -----                                                         |     |
| Lg-Duox1   | -----                                                         |     |
| Lg-Duox2   | -----                                                         |     |
| Lg-Duox3   | -----                                                         |     |
| Dp-Duox    | -----                                                         |     |
| Cb-Duox    | -----                                                         |     |
| Mg-NoxC    | -----                                                         |     |
| Fg-NoxC    | -----                                                         |     |
| Cm-NoxD2   | TPKSLATEAMPHAVD-----                                          | 346 |
| Cm-NoxD1   | DGLDLAPERICMTT-----                                           | 336 |
| Pt-NoxD    | -----                                                         |     |
| An-Fre1    | -----                                                         |     |
| Sc-Fre1    | -----                                                         |     |
|            |                                                               |     |
| Dp-NoxB    | STSESPSGAQSVAHTGYRYMRHPPEI INLPVPVEDPRNDLPHAMWKKFNRRKKGPRDTFG | 443 |
| Dp-NoxB    | KNSDQLNGAPDDPSSSITFNRAQSPALNR-DPYDEGILRDKQHHRYPHHHQPRAMSILV   | 448 |
| Hs-NoxB    | -----                                                         |     |
| Lg-NoxB    | -----                                                         |     |
| Lg-NoxB    | -----                                                         |     |
| Dd-NoxB    | -----                                                         |     |
| Mg-NoxB    | -----                                                         |     |
| Fg-NoxB    | -----                                                         |     |
| Cc-NoxB    | -----                                                         |     |
| Lb-NoxB    | -----                                                         |     |
| fPp-NoxB   | -----                                                         |     |
| Pg-NoxB    | -----                                                         |     |
| Bd-NoxB    | -----                                                         |     |

Mg-NoxB  
Fg-NoxB  
Cc-NoxB  
Lb-NoxB  
fPp-NoxB  
Pg-NoxB  
Bd-NoxB  
Hs-Nox2  
Hs-Nox3  
Hs-Nox1  
Lg-Nox2  
Nv-Nox2A  
Nv-Nox2B  
Ci-Nox2  
Sp-Nox2A  
Sp-Nox2B  
Mb-Nox2  
Hs-Nox4  
Nv-Nox4  
Lg-Nox4  
Dd-NoxA  
Dd-NoxB  
Ng-NoxA  
Os-rboh-C  
Os-rboh-G  
At-rboh-D  
Os-rboh-A  
Os-rboh-B  
Os-rboh-D  
Os-rboh-H  
Os-rboh-E  
Os-rboh-F  
mPp-rboh-A  
mPp-rboh-C  
mPp-rboh-B  
mPp-rboh-D  
Ps-rboh-B  
Ps-rboh-C  
Ps-rboh-A  
Hs-Duox1  
Hs-Duox2  
Lg-Duox1  
Lg-Duox2  
Lg-Duox3  
Dp-Duox  
Cb-Duox  
Mg-NoxC  
Fg-NoxC  
Cm-NoxD2  
Cm-NoxD1  
Pt-NoxD  
An-Fre1  
Sc-Fre1

Dp-Nox5A PETLRAHKTNINLNYIQLCLSKYFMYKRKKNIIQGESSVRDNRPNGITTTSDAIPDPKQM 503  
Dp-Nox5B PIEETPGKSKTGSEVRKRKRATPRASYAPESMRKKPAQFTSRDENRSAHQPNSEKP---HS 504  
Hs-Nox5 ---GSEILLEKHKFCN--- 331  
Lg-Nox5A ----QLKTTKPMISKIVR----- 358  
Lg-Nox5B ---QSKGTYLFLRKIT----- 358  
Dd-NoxC ---NNNIDQIDLEIG----- 357  
Mg-NoxA -----VDPMGMYEV 367  
Fg-NoxA -----VDPMGMYEV 344  
Cc-NoxA -----D-GPSLSRGRDFVEI 353



|            |                                                             |     |
|------------|-------------------------------------------------------------|-----|
| Lb-NoxA    | -----MSRGDYVEL                                              | 340 |
| fPp-NoxA   | -----DDSVYGTRGDFVEL                                         | 355 |
| Pg-NoxA    | -----FSVEDCGEFHDI                                           | 345 |
| Bd-NoxA    | -----                                                       |     |
| Mg-NoxB    | -----GVNGENPD                                               | 333 |
| Fg-NoxB    | -----GLTGREAE                                               | 336 |
| Cc-NoxB    | -----GAVAKPAA                                               | 339 |
| Lb-NoxB    | -----GGKVVGTN                                               | 352 |
| fPp-NoxB   | -----GGKLIGTN                                               | 341 |
| Pg-NoxB    | -----AGRPTV                                                 | 332 |
| Bd-NoxB    | -----S                                                      | 298 |
| Hs-Nox2    | -----                                                       |     |
| Hs-Nox3    | -----                                                       |     |
| Hs-Nox1    | -----                                                       |     |
| Lg-Nox2    | -----                                                       |     |
| Nv-Nox2A   | -----                                                       |     |
| Nv-Nox2B   | -----                                                       |     |
| Ci-Nox2    | -----                                                       |     |
| Sp-Nox2A   | -----                                                       |     |
| Sp-Nox2B   | -----                                                       |     |
| Mb-Nox2    | -----                                                       |     |
| Hs-Nox4    | -----                                                       |     |
| Nv-Nox4    | -----                                                       |     |
| Lg-Nox4    | -----                                                       |     |
| Dd-NoxA    | -----V                                                      | 327 |
| Dd-NoxB    | -----L                                                      | 324 |
| Ng-NoxA    | -----K                                                      | 313 |
| Os-rboh-C  | -----                                                       |     |
| Os-rboh-G  | -----                                                       |     |
| At-rboh-D  | -----                                                       |     |
| Os-rboh-A  | -----                                                       |     |
| Os-rboh-B  | -----                                                       |     |
| Os-rboh-D  | -----                                                       |     |
| Os-rboh-H  | -----                                                       |     |
| Os-rboh-E  | -----                                                       |     |
| Os-rboh-F  | -----                                                       |     |
| mPp-rboh-A | -----                                                       |     |
| mPp-rboh-C | -----                                                       |     |
| mPp-rboh-B | -----                                                       |     |
| mPp-rboh-D | -----                                                       |     |
| Ps-rboh-B  | -----                                                       |     |
| Ps-rboh-C  | -----                                                       |     |
| Ps-rboh-A  | -----                                                       |     |
| Hs-Duox1   | -----                                                       |     |
| Hs-Duox2   | -----                                                       |     |
| Lg-Duox1   | -----                                                       |     |
| Lg-Duox2   | -----                                                       |     |
| Lg-Duox3   | -----                                                       |     |
| Dp-Duox    | -----                                                       |     |
| Cb-Duox    | -----                                                       |     |
| Mg-NoxC    | -----                                                       |     |
| Fg-NoxC    | -----                                                       |     |
| Cm-NoxD2   | -----KSS                                                    | 349 |
| Cm-NoxD1   | -----                                                       |     |
| Pt-NoxD    | -----                                                       |     |
| An-Fre1    | -----                                                       |     |
| Sc-Fre1    | -----                                                       |     |
|            |                                                             |     |
| Dp-Nox5A   | VEGVNIYLPLEITMDGPYGTSSSHIFRAQH-AVLIAAGIGVTPYASILQSIMHRYASLQ | 562 |
| Dp-Nox5B   | VEGVHIYYPLEIAIDGPYGTSSSHIFRAQH-AVLVAAGIGVTPFASILQSIMHRYVSRQ | 563 |
| Hs-Nox5    | -----IKCYIDGPYGTPTRRIFASEH-AVLIGAGIGITPFASILQSIMYRHQKRKH    | 381 |
| Lg-Nox5A   | -----VKIYIDGPFGTSAAREIFDTEH-AVLVSGIGVTPFASILQSILHRFQSATR    | 408 |
| Lg-Nox5B   | -----AEVYLDGPYGTSTREIFQTEH-AVLIGSGIGITPYASILQSIIYRFNAITR    | 408 |

Dd-NoxC -----LKPFRINIDGPPGSSSQYALKQKQ-VILVGAGIGVSPMASLLKDISLKKQRLQL 410  
Mg-NoxA ALQN-GQQMPMLRIDGPGYGAEDVFENEI-AVLIGTGIGVTPWASILKNIWHLRNGPNP 425  
Fg-NoxA ALQN-GDQMPALRIDGPGYGAEDVFENEI-AVLIGTGIGVTPWAAAILKNIWHLRNSPNP 402  
Cc-NoxA DPATMSITLQVVRIDGPGYGAEDVFNNEV-AVLVGAGIGVTPFASILKHIWYRQKKGKL 412  
Lb-NoxA DPAGSSIALPSVRIDGPGYGAEDVFGAEV-AILIGAGIGVTPFASILKHIWYRQKKGKL 399  
fPp-NoxA DSG--ARPLPTVRIDGPGYGAEDVFNVEV-AVLVGAGIGVTPFASILKHIWYRQKKGKL 412  
Pg-NoxA TTIR-SRDLPLVRIDGPGYSPAQDVFKCEV-AILIGAGIGVTPFSSILKNIYYMQAGKL 403  
Bd-NoxA -----MDLPEIRIDGPGYGAEDLYNYKV-AVLVGAGIGVTPAASLLKSVWYRYR--KA 366  
Mg-NoxB VDPALKRVLPRVYVDGPPGSAEDVFKYEI-AVLCGAGIGVTPFASILKSIWYRMNYPQK 392  
Fg-NoxB IDPAIRRVLPRVYVDGPPGSAEDVFKYEV-SVLVGAGIGVTPFASILKSIWYRMNYPQK 395  
Cc-NoxB VPPPINRPLPRVMVDGPPGSAEDFLKYET-VLLVGGGIGVTPFASILKHIWYRMNNTD 398  
Lb-NoxB VNPSVNRLLPRVMVDGPPGSAEDFLKYET-VLLVGGGIGVTPFASILKSIWYRMNFN 411  
fPp-NoxB TNPVNRVLRVMVDGPPGSAEDFLNYET-VLLVGGGIGVTPFASILKSIWYRMN 400  
Pg-NoxB LPPATNRVLRVMVDGPPGSAEDVFKFEV-VMLVGGGIGVTPFASVLSIWKLNFP 391  
Bd-NoxB DNMPAPDTLPRVMVDGPPGSAEDVFDYEA-AVLVGAGIGVTPFASILKTIWFRINN 357  
Hs-Nox2 --FQDAWKLPKIAVDGPPGTASEDVFSYEV-VMLVGGGIGVTPFASILKSVWYKYCN--N 430  
Hs-Nox3 --LQEPWSLPRLAVDGPFGTALTDVFHYVP-CVCVAAGIGVTPFAALLKSIWYKCE--A 428  
Hs-Nox1 -----PIPRIEVDGPPGTASEDVQYEV-AVLVGAGIGVTPFASILKSIWYKFC--A 424  
Lg-Nox2 --FQEAWKMPKIAIDGPGYGTSTEDCFRFDV-AVLIGTGIGVTPFASVLRHVWKKYST--R 423  
Nv-Nox2A --LQSVNEMPRALDGPFGTASIDVFKYGV-GMYIGAGIGVTPFASVLSIWIYRYNE--N 422  
Nv-Nox2B --QIAIDQMPRIAIDGPGYGTASTDVFRYEV-VMCIGAGIGVTPFASILKSIWYRHNQ--D 416  
Ci-Nox2 --VQSPWKMPRIAIDGPPGTASEDVFNYPV-AICVGGGIGVTPFASLLKSVWYKLN--P 443  
Sp-Nox2A --QSQDELARVAVDGPPGTASIDIFKYQV-AICVGGGIGVTPFASILKSIWLKSVN--N 441  
Sp-Nox2B --PLSITQLPRVQVDGPPGTSTCTIDFYDV-VMCVSAGIGVTPYASTLKSIIWISSRQ--N 415  
Mb-Nox2 --PKVGSSELPYICIDGPPGTASEDMYHYPV-AMLIGAGIGVTPFASLLKELYFRKSNPSA 464  
Hs-Nox4 LPFIQSRNYPKLYIDGPPGSPFEESLNYEV-SLCVAGGIGVTPFASILN----TLLDDWK 450  
Nv-Nox4 LVAAVSRSAVLSVDGPPGSPCMDVEEYRV-SMCIATGIGVTPFAALITRIRSQIHAQR 444  
Lg-Nox4 LHYEDIVRSPKLVDPYSSPLCEMNQSKL-AVCIAGGIGVTPFISFLKLR-----YK 372  
Dd-NoxA LKSPD-GKP-ILRIDGPPGAASEEVFKYKQ-VILVGAGIGVTPFASILKHIKYMARTYN 384  
Dd-NoxB KSTQNRGKRRILKIDGPPGAPAEFFKYRN-LVLIGAGIGVTPFSSILRHLKNQNDKQTN 383  
Ng-NoxA PTTDP-GTDYLIRVDGPPGTCAEYCFDFEY-VMLIAAGIGVTPYSSLLKHFKFRDAAA 371  
Os-rboh-C ----EKARFPKLLVDGPGYGAQDYREYDV-LLLIGLGIGATPLISIVKDVLN---HIQG 410  
Os-rboh-G ----HHSRFPKLLVDGPGYGAQDYWKYDV-LLLIGLGIGATPLISIVKDVLN---HIYD 370  
At-rboh-D ----GNLFPKVLVDGPGYGAQDYKDYDV-VLLVGLGIGATPMISILKDIIN---NMKG 403  
Os-rboh-A ----KKLPLKLLVDGPGYSPAQDYKYDV-LLLVGLGIGATPFISILKDLNLIKME 407  
Os-rboh-B ----KKALPKLLVDGPGYSPAQDYKYDV-LLLVGLGIGATPFISILKDLINSIKME 407  
Os-rboh-D ----PRSLPRLVDGPGYGAQDFRNYDV-LLLVGLGIGATPFISILRDLNLIKLA 423  
Os-rboh-H ----QKSPRLVDGPGYGAQDFRNYDV-LLLVGLGIGATPFISILRDLNLIKLA 467  
Os-rboh-E ----EDTRFPKVLVDGPGYGAQNYKDYDI-LLLIGLGIGATPFISILKDLN---NIKS 413  
Os-rboh-F ----EETCFPKVLDGPPGAPQNYKDYDI-LLLIGLGIGATPFISILKDLN---NIKS 413  
mPp-rboh-A ----CCHRFKLYLDGPGYGAQDYLYKYDV-LLLVGLGIGATPFISILKDLMLH---HTRN 415  
mPp-rboh-C ----AARFPKLYLDGPGYGAQDYLYKYDV-LLLVGLGIGATPFISILKDLMLH---HTIN 407  
mPp-rboh-B ----AARFPKLVVDGPGYGAQDYLYKYDV-LLLVGLGIGATPFISILKDLMLH---HTR 406  
mPp-rboh-D ----APRFPKLYLDGPGYGAQDYLYKYDV-LLLVGLGIGATPFISILKDLMLH---HSRN 416  
Ps-rboh-B -----YPDHLDGPPVGAQDYHRYKT-VICVGGGIGVTPFASILKDVVHLWEANRC 381  
Ps-rboh-C -----YPDVYLDGPPVGAQDYHRYKT-VICVGGGIGVTPFASILKDVVHLWEDNRC 368  
Ps-rboh-A -----PYPTVFLDGPVGAQDYRYRE-VVLIGAGIGVTPFASILRSIMHQWESYRC 384  
Hs-Duox1 -----ARYPKLYLDGPPGEGHQEWHKFEV-SVLVGGGIGVTPFASILKDLVFKSSVS-- 373  
Hs-Duox2 -----AGYPKLYLDGPPGEGHQEWHKFEV-SVLVGGGIGVTPFASILKDLVFKSSLG-- 373  
Lg-Duox1 -----KGFPKLYLDGPPGEGHQDWYRYPV-AVLVGGGIGVTPFASILKDLVQKSKMK-- 381  
Lg-Duox2 -----KPLPLYVDGPPGEGHQDWFDFDV-AVLVGGGIGVTPFASILKDIAFKSKAG-- 380  
Lg-Duox3 -----NPYPKFLDGPYGAQDQWYQYEV-SLLVGGGIGVTPYASILKDFVHMTSINKNT 382  
Dp-Duox -----DMDPKIQLDGPFGGNDWYKFEV-AVMVGGGIGVTPYASILNDLVFGTSTNRY 383  
Cb-Duox -----SPYPLIHLKGPYGDGNQEWMYNEV-AIMVGGGIGVTPYASTLNDLVQLTASDSF 384  
Mg-NoxC -----QEVDEIINGPFGAPARFYDFNH-TILVAGIGLTPFSGILADLQAKEDRLHG 373  
Fg-NoxC -----GESEIEVINGPFGAPARFYDFNH-SIIIGAGIGVTPFSGILADLQYNDLHDG 370  
Cm-NoxD2 ITTCLPINRRWILLSGYPGAPAQSHQFAH-QLLIGTGVGASPMFIVQELCG-RATPCD 407  
Cm-NoxD1 -----IEAYRLLAGPYGAPASHLHFPY-QLLIGSGVGTMPVLSILREIC SARAPAKL 389  
Pt-NoxD -----APLSMTVNLRGPPGAPQNYLNYRH-LVVIGSGIGVTPLLSVWAYLVRATKGLVK 381  
An-Fre1 -----TIQPLLLLEGPYGHTAP-LHTFDT-VLLIAGGTGIAATLPYILDYAAARLDSQAT 619  
Sc-Fre1 -----CKIFLEGPYGVTPHIAKLRNLVGAAGLVAAIYPHFVECLRLPSTDQL 558

\*\* \* \*

Dp-Nox5A KPCNCRYSWANQ----- 574

|            |                                                           |     |
|------------|-----------------------------------------------------------|-----|
| Dp-Nox5B   | SCPRCHHSWVSQ                                              | 575 |
| Hs-Nox5    | TCPSCQHSWIEG                                              | 393 |
| Lg-Nox5A   | TCPKCQHSFYD                                               | 419 |
| Lg-Nox5B   | TCPKCHHCFNEP                                              | 420 |
| Dd-NoxC    | LNQGDQIALEQSKN                                            | 424 |
| Mg-NoxA    | PTR                                                       | 428 |
| Fg-NoxA    | PRR                                                       | 405 |
| Cc-NoxA    | GS                                                        | 414 |
| Lb-NoxA    | GS                                                        | 401 |
| fPp-NoxA   | QS                                                        | 414 |
| Pg-NoxA    | GL                                                        | 405 |
| Bd-NoxA    | SMP                                                       | 369 |
| Mg-NoxB    | K                                                         | 393 |
| Fg-NoxB    | K                                                         | 396 |
| Cc-NoxB    | AK                                                        | 400 |
| Lb-NoxB    | SK                                                        | 413 |
| fPp-NoxB   | SK                                                        | 402 |
| Pg-NoxB    | SKQGS                                                     | 396 |
| Bd-NoxB    | A                                                         | 358 |
| Hs-Nox2    | ATN                                                       | 433 |
| Hs-Nox3    | QTP                                                       | 431 |
| Hs-Nox1    | DHN                                                       | 427 |
| Lg-Nox2    | RNE                                                       | 426 |
| Nv-Nox2A   | PSD                                                       | 425 |
| Nv-Nox2B   | LEN                                                       | 419 |
| Ci-Nox2    | EHE                                                       | 446 |
| Sp-Nox2A   | SAS                                                       | 444 |
| Sp-Nox2B   | FCT                                                       | 418 |
| Mb-Nox2    | YPS                                                       | 467 |
| Hs-Nox4    | PYK                                                       | 453 |
| Nv-Nox4    | PPR                                                       | 447 |
| Lg-Nox4    | VGK                                                       | 375 |
| Dd-NoxA    | TTP                                                       | 387 |
| Dd-NoxB    | ADEN                                                      | 387 |
| Ng-NoxA    | GQAP                                                      | 375 |
| Os-rboh-C  | E---GSVGTTEPE                                             | 420 |
| Os-rboh-G  | DPESAASPHTTNGG                                            | 384 |
| At-rboh-D  | P----DRSDIEN                                              | 412 |
| Os-rboh-A  | EEDASTDLYPPMGR                                            | 421 |
| Os-rboh-B  | EEEASGDLYPPIGR                                            | 421 |
| Os-rboh-D  | ELMDLAMETSRSSED                                           | 437 |
| Os-rboh-H  | ELMDLAMETSRSDD                                            | 481 |
| Os-rboh-E  | N---EEVESIHGS                                             | 423 |
| Os-rboh-F  | N---GDVQSTHDA                                             | 423 |
| mPp-rboh-A | DSSGHSYPVLT                                               | 426 |
| mPp-rboh-C | ESLGHSDPSLTPDL                                            | 421 |
| mPp-rboh-B | ---YDLS                                                   | 410 |
| mPp-rboh-D | DSVSDLSSSPDLN                                             | 429 |
| Ps-rboh-B  | PNCS                                                      | 385 |
| Ps-rboh-C  | LNCN                                                      | 372 |
| Ps-rboh-A  | PQCG                                                      | 388 |
| Hs-Duox1   | CQVFC                                                     | 378 |
| Hs-Duox2   | SQMLC                                                     | 378 |
| Lg-Duox1   | VKFPC                                                     | 386 |
| Lg-Duox2   | IKINC                                                     | 385 |
| Lg-Duox3   | YKVKC                                                     | 387 |
| Dp-Duox    | SGVAC                                                     | 388 |
| Cb-Duox    | HKVRC                                                     | 389 |
| Mg-NoxC    | GPTQKLQEAEKGGDVRGSTSADAPDGRRIGTSREAEAMPQRDVMQAPTSGDQSNNTL | 433 |
| Fg-NoxC    | GNHEVDHHR-----HDSEATAIPQAARRSDSSSDEATTSNDVPETPTRQGSVGPDLI | 424 |
| Cm-NoxD2   | N-----                                                    | 408 |
| Cm-NoxD1   | N-----                                                    | 390 |
| Pt-NoxD    | KVYFVFIG                                                  | 389 |
| An-Fre1    | KTT                                                       | 622 |

|            |                                                              |        |
|------------|--------------------------------------------------------------|--------|
| Dp-Nox5A   | -----MPDSIMNLKKVDFFWINRDQRSFEWVHVLSQLEMEQAEM                 | 614    |
| Dp-Nox5B   | -----MPDSIMNLKKVDFFWINREQRSFEWVFEVLSQLEVEQAEM                | 615    |
| Hs-Nox5    | -----VQDN-MKLHKVDFIWINRDQRSFEWVSVLLTKLEMDQAEE                | 432    |
| Lg-Nox5A   | -----QRGPGMKIKRVDFIWINRDQKNFEWVFRMLTDIEVEQA-N                | 458    |
| Lg-Nox5B   | -----LAGSMMLKKVDFFWINRDQRAFWEFTSLLTQLELEQVKN                 | 460    |
| Dd-NoxC    | ---EIT-----TKFGLGNLEKVHFFWLNRDQHSFQWFEDLLIDISTNGN---         | 465    |
| Mg-NoxA    | -----LRRVEFLWVCKDTSSFEWFQTLSSLEEQSTDA                        | 461    |
| Fg-NoxA    | -----LRRVEFIWVCKDTGSFEWFQTLSSLEEQSNEA                        | 438    |
| Cc-NoxA    | -----LRRVEFFWVCRDAPSFQWQSLLEVEAAQAD-                         | 446    |
| Lb-NoxA    | -----LRRVEFFWVCRDAPSFQWQSLLEVEAAQADR                         | 434    |
| fPp-NoxA   | -----LKRVEFFWVCRDAPSFQWQSLLEVEAAQVD-                         | 446    |
| Pg-NoxA    | -----LRKVQFIWINKETTSFSWFKTLKLNLEDIQHD-                       | 437    |
| Bd-NoxA    | -----LKKVYFVWINRDKEAFQWQSLLASLEETIPR-                        | 401    |
| Mg-NoxB    | -----TRLAKVYFFWICRDFGSFEWFRSLLLAIE----                       | AQ 424 |
| Fg-NoxB    | -----TRLSKVYFFWICRDFGSFEWFRSLLLAIVE----                      | AQ 427 |
| Cc-NoxB    | -----PTRLSKVYFTWVIRDFGTAEFWFSLLHAIE----                      | EE 432 |
| Lb-NoxB    | -----PTRLSKVYFTWVIRDFGVAEFWFSLLHAIE----                      | EQ 445 |
| fPp-NoxB   | -----PTRLSKVYFTWVIRDFGSAEFWFSLLQAIE----                      | EQ 434 |
| Pg-NoxB    | -----PIRLQKVYFFWVCRDFGSFEWFKSLLSAIE----                      | EQ 428 |
| Bd-NoxB    | -----VPLKKVYFFWICRDKDAFEWFQDLLSTIE----                       | DE 389 |
| Hs-Nox2    | -----LKLKKIYFYWLCRDTHAFEFWADLLQLESQMQR                       | 468    |
| Hs-Nox3    | -----LKLKVYFYWICRDARAFEFWADLLSLETRMSEQ                       | 466    |
| Hs-Nox1    | -----LTKKKIYFYWICRETGAFSWFNLLTSLEQEMEEL                      | 462    |
| Lg-Nox2    | -----LQLKYVHFYWCPTSSFEWQLLENSLESQMAEM                        | 461    |
| Nv-Nox2A   | -----LNIKKVYFFWICNDTNAFEWFTDLLKILEEKMIDS                     | 460    |
| Nv-Nox2B   | -----LRVKKVYFYWICRDTFAFEWFSDLLKHIEIQMDEM                     | 454    |
| Ci-Nox2    | -----MVLKKVYFFWICPETHAFEFWGDLLKYLERQLTEI                     | 481    |
| Sp-Nox2A   | -----LKLKKVYFFWICPDTNAFEWFTLLDSIDTHFTEQ                      | 479    |
| Sp-Nox2B   | -----LHLKRMFYWICRDTHAFEFWVELLSLELILRQI                       | 453    |
| Mb-Nox2    | -----FKTKVYFYWMCPGFDWGFASLLIDLEDKLEQL                        | 502    |
| Hs-Nox4    | -----LRLRYFIWVCRDIQSFRWFADLLCMLHNKFWQE                       | 486    |
| Nv-Nox4    | -----PHRLYFVWICREVGALQWFADLIHETSRLWEL                        | 480    |
| Lg-Nox4    | -----LKKLYFIWVDRDLSHLAWFMEDILLSH-QLLER                       | 407    |
| Dd-NoxA    | -----LIDKVFHWICRDRNSFEWFSGLIGELEMEN-H-                       | 419    |
| Dd-NoxB    | -----HLKINKIYFIWISRQKNSFQWFTDILAELENDERI-                    | 422    |
| Ng-NoxA    | -----PLKIRRASFYWINRDEGSWEWFSIDLNQLETEN---                    | 408    |
| Os-rboh-C  | ---SS-----SKAKKPFMTKRAYFYWVTREEGSFEWFRGVMNEVSEKDK---         | 462    |
| Os-rboh-G  | ---GA-----AAAARRAFMTKRVYFYWCTREEGSFEWFRGVMNEVADRAG-          | 427    |
| At-rboh-D  | ---NN-----SNNNSKGFTRKAYFYWVTREQGSFEWFKGIMDEISELDE---         | 454    |
| Os-rboh-A  | ---NKPHVDLGLMTITSRPKKILKTTNAYFYWVTREQGSFDWFKGVMNEIADLDQ---   | 474    |
| Os-rboh-B  | ---NKAHVLDLTLMRIITSKPKRVLKTNAYFYWVTREQGSFDWFKGVMNEIAELDQ---  | 474    |
| Os-rboh-D  | ---SAN---SFSVSTASSNKRAYRTSRAHFYWVTREPLSFEWFKGVMNEVAEMDK---   | 487    |
| Os-rboh-H  | ---SAN---SFSVSTASSNKRAYRTSRAHFYWVTREPGSFEWFKGVMNEVAEMDK---   | 531    |
| Os-rboh-E  | ---EIG-----SFKNNGPGRAYFYWVTREQGSFEWFKGVMNDVAESDH---          | 463    |
| Os-rboh-F  | ---ELGC-----TFKSNPGRAYFYWVTREQGSFEWFKGVMNDVAESDH---          | 464    |
| mPp-rboh-A | -----TKAKRKPKAYFYWITREQGSFDWFRGVMREVEEIDN---                 | 462    |
| mPp-rboh-C | ---RPM-----ESPRTRSKKAKRNPKAYFYWITREQGSFDWFRGVMREVEEIDH---    | 468    |
| mPp-rboh-B | -----DPVMKPCDRES-SYFYWVTREQGSFDWFRGIMREVEEIDN---             | 449    |
| mPp-rboh-D | -----PTGSPPPKKAKRDPKAYFYWVTREQGSFDWFRGIMREVEEIDN---          | 473    |
| Ps-rboh-B  | -----HVRHPGSFKIQKLYFHWVTRGQESLSWFEEETMNTQIAEMDR---           | 425    |
| Ps-rboh-C  | -----HVRHPSSFQIQKLYFHWVTRGQESLSWFEGTMKQIAQMDR---             | 412    |
| Ps-rboh-A  | -----HVRFPSPFQIRKIYFYWVMREQEALTWFTNTMNQLSQMDA---             | 428    |
| Hs-Duox1   | -----KKIYFIWVTRTRQRFEWLADIIREVEENDHQ-                        | 409    |
| Hs-Duox2   | -----KKIYFIWVTRTRQRFEWLADIIQEVEENDHQ-                        | 409    |
| Lg-Duox1   | -----QKVYFLWVTRTRQKSFEMTIDIIRVELGDVN-                        | 417    |
| Lg-Duox2   | -----KKVYFVWITRSQKHFEWLIDIIIRDVEEQDVL-                       | 416    |
| Lg-Duox3   | -----QKLYFIWVTGSRHFWEWLIDILREVEEIDER-                        | 418    |
| Dp-Duox    | -----KKVYFLWTCPSHRHFWEWIDVLRDIESKDVT-                        | 419    |
| Cb-Duox    | -----QKVYFLWVCPSHKNYEFVDVLKNVENQDRR-                         | 420    |
| Mg-NoxC    | QETADADSDSASSISRPSSSFSSASDYRRVDFHWMVRDRNHLLWISSELLNTVSRSQAWH | 493    |
| Fg-NoxC    | NKEKQPQADKAG-----SFAEDYRRVDFHWMVRERNYLLWLSDLLNDVMSQDWH       | 474    |

|            |                                                          |     |
|------------|----------------------------------------------------------|-----|
| Cm-NoxD2   | -----IRTVTFVWVVRYVEDLWFLEKLYELASQQDASD                   | 441 |
| Cm-NoxD1   | -----VFSLTFVWVVREYADLWGIQGLFDLA--QTWTP                   | 421 |
| Pt-NoxD    | -----AFIALHSVRIFHFYATARPPHTEEPTRGVDAIHSVT                | 426 |
| An-Fre1    | -----RLHLIWSARQRDVFTTVLSDELSHVLQCEG-                     | 652 |
| Sc-Fre1    | -----FYWIVNDLSHLKWFENELQWLKEKSCEV                        | 589 |
|            |                                                          |     |
| Dp-Nox5A   | DSALG---RFLDLHMYITSALKKTDLKAVGLQMALDILLYAE-----          | 652 |
| Dp-Nox5B   | GSALG---RFLDLHMYITSALKKTDLKAVGLQMALDLIHAK-----           | 653 |
| Hs-Nox5    | A-QYG---RFLELHMYMTSALGKNDMKAIGLQMALDILLANK-----          | 469 |
| Lg-Nox5A   | YDKFG---RIIHMHYMTSALSKTDMKGLGLQMALELLHTK-----            | 496 |
| Lg-Nox5B   | GSHLD---KILNLHMYMTAAVQKADMKGIGLQVALDLIHEK-----           | 498 |
| Dd-NoxC    | --SNL---PKISINTFNTRVFPKNDVRVFMWNLWGLDKLFKA-----          | 501 |
| Mg-NoxA    | AGLPGGNGVEFLKIHSYLTQKLDMDTTQNIIVLNSVGAAL-----            | 500 |
| Fg-NoxA    | ARMPGSTGVEFLKIHTYLTQKLDIDTAQNIIVLNSVGSQM-----            | 477 |
| Cc-NoxA    | -----PNFLRINIYLTQKINEDMLWNI AVNDAGADY-----               | 477 |
| Lb-NoxA    | E--LHVLAANFLRINVYLTQKISEDMLWNI AVNDAGAEY-----            | 471 |
| fPp-NoxA   | -----PNFLRINIYLTQKIGEDMLWNI ALNDAGAEY-----               | 477 |
| Pg-NoxA    | -----YSFLRMDMYLTGSMDEDTISNVVLTNGAHKF-----                | 468 |
| Bd-NoxA    | -----SFLEIHTYLTGNLAVDDIQNILLN-SDMDV-----                 | 430 |
| Mg-NoxB    | DVD-----NRIEIHTYLTAKIKADDATNIMINDANAD-----               | 456 |
| Fg-NoxB    | DLN-----HRIEIHTYLTARIKADDATNIMINDANAD-----               | 459 |
| Cc-NoxB    | DTQ-----NRIEINIYLTAKLKEDEVNNIIVQDVGAE-----               | 464 |
| Lb-NoxB    | DTQ-----GRIEINIYLTAKIKEDDMNNIILQDVGAE-----               | 477 |
| fPp-NoxB   | DTQ-----NRIEINIYLTAKIKEDDMNNIIVQDVGAE-----               | 466 |
| Pg-NoxB    | DVD-----RRVELHTYITQKLKDDDDINNIIVSDVGGN-----              | 460 |
| Bd-NoxB    | NIS-----NFLEIHTYLTQKLIKISEVKNIVINDGEDG-----              | 421 |
| Hs-Nox2    | NNA-----GFLSYNIYLT-GWDESQLNHFAVHHDEE-----                | 498 |
| Hs-Nox3    | GKT-----HFLSYHIFLT-GWDENQALHIALHWDEN-----                | 496 |
| Hs-Nox1    | GKV-----GFLNYRFLT-GWDSNIVGHAALNFDKA-----                 | 492 |
| Lg-Nox2    | GSA-----NFLSHNIYLTSGWDSNQAKNIVLHNDEE-----                | 492 |
| Nv-Nox2A   | GNA-----GFLEYNIYLTTRGWGANMARDIYLREDEV-----               | 491 |
| Nv-Nox2B   | NMP-----GFIQINIFLT-GWDKLANQVVMERSAD-----                 | 484 |
| Ci-Nox2    | GRQ-----DLIEYHIYLTTRGWDHKAKAIYAHEEDT-----                | 512 |
| Sp-Nox2A   | GKP-----DFLKYIYLTSGWNTQAKNIYLQEEQE-----                  | 510 |
| Sp-Nox2B   | DKE-----HLLSYSIYLTTRGWDTQAKNIFMQEDRE-----                | 484 |
| Mb-Nox2    | GVP-----DFLEIRVFTTRGWSQDDAAKIMLQEDESQDS-----             | 536 |
| Hs-Nox4    | NRP-----DYVNIQLYLSQTD-GIQKIIG--EKYHALN-----              | 516 |
| Nv-Nox4    | NRP-----DFLTCLFYITSKG-QKEKICINHTQSSWFD-----              | 512 |
| Lg-Nox4    | KFP-----NSLEVQFYVTNSDSTTEQRHFSDSLNFIQ-----               | 440 |
| Dd-NoxA    | -----NNFLEIHPYLTGALSAQEIRDVMYGD-----                     | 445 |
| Dd-NoxB    | -----DSILEIHIFLTGALDLDYAKIKN-----                        | 446 |
| Ng-NoxA    | -----PEFFDIHTYMTGMLKADDVKKIMFTSSEYQTSNTAGNVQQSGKVDPMVRAL | 460 |
| Os-rboh-C  | -----DGVIELHNHCSSVYQEGDARSALIVMLQELQHAKK-----            | 497 |
| Os-rboh-G  | -----RELIELHNHCTSVYEEGDARSALVTMLQALHHAKN-----            | 462 |
| At-rboh-D  | -----EGIELHNYCTSVYEEGDARVALIAMLQSLQHAKN-----             | 489 |
| Os-rboh-A  | -----RNI IEMHNYLTSVYEEGDARSALITMLQALNHAKN-----           | 509 |
| Os-rboh-B  | -----RNI IEMHNYLTSVYEEGDARSALITMLQALNHAKN-----           | 509 |
| Os-rboh-D  | -----KGVIELHNYLTSVYEERDARTTLLSMVQALNHAKH-----            | 522 |
| Os-rboh-H  | -----KGVIELHNYLTSVYEERDARSTLLSMVQALNHAKH-----            | 566 |
| Os-rboh-E  | -----NNI IEMHNYLTSVYEEGDARSALIAMVQSLQHAKN-----           | 498 |
| Os-rboh-F  | -----DNV IEMHNYLTSVYEEGDARSALIAMVQSLQHAKN-----           | 499 |
| mPp-rboh-A | -----KRS IEMHNYLTSVYEEGDARSTLVMMMLQALHHAKN-----          | 497 |
| mPp-rboh-C | -----KGS IEMHNYLTSVYEEGDARSTLVIMLQALHHAKN-----           | 503 |
| mPp-rboh-B | -----KES IEMHNYLTSVYEEGDARSTLVTMLQSLYHAKN-----           | 484 |
| mPp-rboh-D | -----KEL IEMHNYLTSVYEEGDARSTLVTMLQSLHHAKN-----           | 508 |
| Ps-rboh-B  | -----DNV IETHQYLSL--LKGSENTSQKMFQEFVHEQT-----            | 458 |
| Ps-rboh-C  | -----DNV IETHQYLSLTVLGGEEENTSQKMFQEFVHEQT-----           | 447 |
| Ps-rboh-A  | -----DNRLEIHNFFSS--VKNEEV IAPLQALQNF IHDTE-----          | 461 |
| Hs-Duox1   | -----DLVSVHIYITQLAEKFDLRTTMLYICERHFQKVLN-----            | 444 |
| Hs-Duox2   | -----DLVSVHIYVITQLAEKFDLRTTMLYICERHFQKVLN-----           | 444 |
| Lg-Duox1   | -----NLVSVHIFITQFQKFDLRTTMLYICERHFQKVG-----              | 452 |
| Lg-Duox2   | -----EIVNVHIFITQFTQKYDLRTTMLYICERNFQKVEN-----            | 451 |
| Lg-Duox3   | -----GMVSIIDIFITQFFQNFDLRTAMLYVFEHFQKMTGG-----           | 454 |

|          |                                                     |     |
|----------|-----------------------------------------------------|-----|
| Dp-Duox  | -----NVLEMHIFITQFFHKFDLRTTMLYICENHFQRISK-----       | 454 |
| Cb-Duox  | -----GILETHIFVTQLFHKFDLRTTMLYICEKHFRAFNAG-----      | 456 |
| Mg-NoxC  | HRHDAP-GEYHLDIRMQTHVTQKRKNVSTHVYRWLLEQHRTPEHP-----  | 537 |
| Fg-NoxC  | REHED---KPHLDIRINTHVTAQKKISTHVYRWLLEMHRTDEHP-----   | 516 |
| Cm-NoxD2 | PCR-----PRLRIHVHITRLGHDDADPVSSRLPANCGEILQFHCGR----- | 482 |
| Cm-NoxD1 | DLI-----PRVRVHIFLTR-GEIPASILEAGQSTKS--ILQFHQGR----- | 459 |
| Pt-NoxD  | GIWVAKKYEDMSFAAPSLVRTLPGLSKVFSRLRFATRDKEED-----     | 468 |
| An-Fre1  | -----VTISFFCTGGDPMSPIEIEAIDKEVAIN-----              | 680 |
| Sc-Fre1  | S-----VIYTGSSVEDTNSDESTKGFDDKEESE-----              | 617 |

|            |                                                            |     |
|------------|------------------------------------------------------------|-----|
| Dp-Nox5A   | -----EKRDLVTG--LK                                          | 662 |
| Dp-Nox5B   | -----DKRDLVTG--LK                                          | 663 |
| Hs-Nox5    | -----EKKDSITG--LQ                                          | 479 |
| Lg-Nox5A   | -----EHRDLVTG--LR                                          | 506 |
| Lg-Nox5B   | -----EQRDLLTG--LR                                          | 508 |
| Dd-NoxC    | -----QGLDPTTN--LP                                          | 511 |
| Mg-NoxA    | -----DPLTE--LK                                             | 507 |
| Fg-NoxA    | -----DPLTE--LQ                                             | 484 |
| Cc-NoxA    | -----DPLTL--LR                                             | 484 |
| Lb-NoxA    | -----DPLTL--LR                                             | 478 |
| fPp-NoxA   | -----DPLTL--LR                                             | 484 |
| Pg-NoxA    | -----DSLTG--LK                                             | 475 |
| Bd-NoxA    | -----DPLTE--LQ                                             | 437 |
| Mg-NoxB    | -----KDAITG--LR                                            | 464 |
| Fg-NoxB    | -----KDTITG--LR                                            | 467 |
| Cc-NoxB    | -----KDAITS--LR                                            | 472 |
| Lb-NoxB    | -----KDAITS--LR                                            | 485 |
| fPp-NoxB   | -----KDAITS--LR                                            | 474 |
| Pg-NoxB    | -----RDAITQ--LR                                            | 468 |
| Bd-NoxB    | -----RDAITG--LK                                            | 429 |
| Hs-Nox2    | -----KDVITG--LK                                            | 506 |
| Hs-Nox3    | -----TDVITG--LK                                            | 504 |
| Hs-Nox1    | -----TDIVTG--LK                                            | 500 |
| Lg-Nox2    | -----RDAVTG--LQ                                            | 500 |
| Nv-Nox2A   | -----EDPITR--LR                                            | 499 |
| Nv-Nox2B   | -----RDPITG--LF                                            | 492 |
| Ci-Nox2    | -----HDVITG--LE                                            | 520 |
| Sp-Nox2A   | -----IDAITG--LR                                            | 518 |
| Sp-Nox2B   | -----IDAVTG--LR                                            | 492 |
| Mb-Nox2    | -----IVRDAETGRALR                                          | 548 |
| Hs-Nox4    | -----                                                      |     |
| Nv-Nox4    | -----                                                      |     |
| Lg-Nox4    | -----                                                      |     |
| Dd-NoxA    | -----EEKDLITGFT--                                          | 455 |
| Dd-NoxB    | -----AQKCHITNLH--                                          | 456 |
| Ng-NoxA    | HKYDAQSSDEISLDRNDIVVSEQDESGWWTGTNTTTKQTGLFPGNFVVKVDHVTMADS | 520 |
| Os-rboh-C  | -----GVDILS--GTS                                           | 506 |
| Os-rboh-G  | -----GVDVVS--GTR                                           | 471 |
| At-rboh-D  | -----GVDVVS--GTR                                           | 498 |
| Os-rboh-A  | -----GVDIVS--GTK                                           | 518 |
| Os-rboh-B  | -----GVDIVS--GTK                                           | 518 |
| Os-rboh-D  | -----GVDIVS--GTR                                           | 531 |
| Os-rboh-H  | -----GVDIVS--GTR                                           | 575 |
| Os-rboh-E  | -----GVDIVS--GSR                                           | 507 |
| Os-rboh-F  | -----GVDIVS--GSK                                           | 508 |
| mPp-rboh-A | -----GVDLVS--GTR                                           | 506 |
| mPp-rboh-C | -----GVDLVS--GTR                                           | 512 |
| mPp-rboh-B | -----GVDLVS--GTR                                           | 493 |
| mPp-rboh-D | -----GVDVVS--GTR                                           | 517 |
| Ps-rboh-B  | -----GKDFVSGLSTK                                           | 469 |
| Ps-rboh-C  | -----GKDFVSGMDTK                                           | 458 |
| Ps-rboh-A  | -----GQDIISGLQTR                                           | 472 |
| Hs-Duox1   | -----RSLFTG--LR                                            | 452 |

|          |                               |     |
|----------|-------------------------------|-----|
| Hs-Duox2 | -----RSLFTG--LR               | 452 |
| Lg-Duox1 | -----QSLFTG--LR               | 460 |
| Lg-Duox2 | -----KSLFTG--LR               | 459 |
| Lg-Duox3 | -----KSVYTG--LK               | 462 |
| Dp-Duox  | -----RSMFTG--LK               | 462 |
| Cb-Duox  | -----MSMFTG--LH               | 464 |
| Mg-NoxC  | -----ASPITG--LI               | 545 |
| Fg-NoxC  | -----ASPLTG--LL               | 524 |
| Cm-NoxD2 | -----PDFGEYVAELVNEHDHTTTP--LA | 504 |
| Cm-NoxD1 | -----PRFETFIEDLL----DLRDP--YE | 477 |
| Pt-NoxD  | -----LVHRNPLADHGPD            | 481 |
| An-Fre1  | -----TTSN----                 | 684 |
| Sc-Fre1  | -----IT                       | 619 |

|            |                                  |                        |     |
|------------|----------------------------------|------------------------|-----|
| Dp-Nox5A   | TRTNAGRPNWDK-VFQKLIDEDKGN-----   | VTVFYCGPP              | 695 |
| Dp-Nox5B   | TRTNAGRPNWDK-IFQKLVDEDKGK-----   | VTVFYCGPP              | 696 |
| Hs-Nox5    | TRTQPGRPDWSK-VFQKVAEEKKGG-----   | VQVFFCGSP              | 512 |
| Lg-Nox5A   | TRTHAGRPNFDE-LFGEIKQNKAGK-----   | VKVFLCGPQ              | 539 |
| Lg-Nox5B   | TRTKAGRPDFNE-LFKSIAAQKHGK-----   | VKVFFCGAP              | 541 |
| Dd-NoxC    | FKTHWGRPNWDT-IFQYYSKKYSGES-----  | ISVFCCGSP              | 545 |
| Mg-NoxA    | SRTNFGRPNFAK-LFASMRDGMIDRT-----  | YLSGLESMKTTVGVYFCGSP   | 553 |
| Fg-NoxA    | SRTNFGRPNDFPR-LFTTMRNGILDRT----- | YLNGLSHIRTTVGVYFCGSP   | 530 |
| Cc-NoxA    | SRTMFGRPDWNS-IYSRIRQAVEGGQ-----  | YIPGATAQLKTKVGYFCGSP   | 530 |
| Lb-NoxA    | SRTMFGRPDWMT-IFGQMKQAIIEGGQ----- | YLPGSTSQLKTKVATYFCGPG  | 524 |
| fPp-NoxA   | TRTMFGRPDWKN-IYARMKQAIEMGQ-----  | YLPGTKEQLKTKVGYFCGPG   | 530 |
| Pg-NoxA    | SQTHFGKPHWKKDVFDPIRKAIHSGD-----  | WYERDISG-TTKVGCFCYCGPR | 521 |
| Bd-NoxA    | SRTHYGRPAWSQ-LLNGIKLNVD-----     | VRDPQVEVGFYFCGPG       | 476 |
| Mg-NoxB    | APTNFGRPNWDM-IFRGIRKLHT-----     | PAEAGVFFCGPK           | 498 |
| Fg-NoxB    | SPTNFGRPNWDM-IFRGIRKIHS-----     | PAEAGVFGGPK            | 501 |
| Cc-NoxB    | APTHFGRPNWDR-VFGSLCEKHP-----     | ETDVGVFCCGPA           | 506 |
| Lb-NoxB    | APTHFGRPNWDR-VFGSIAEKHP-----     | ETDVGVFCCGPA           | 519 |
| fPp-NoxB   | APTHYGRPNWDR-VFSSIAEKHP-----     | ETDVGVFCCGPA           | 508 |
| Pg-NoxB    | SPTHYGRPNWDR-IFNSVRETHP-----     | ATDVGVFCCGPG           | 502 |
| Bd-NoxB    | SRTQYGRPNWDQ-IFEALRVKHR-----     | ATDIGVFCCGPK           | 463 |
| Hs-Nox2    | QKTLYGRPNWDN-EFKTIASQHP-----     | NTRIGVFLCGPE           | 540 |
| Hs-Nox3    | QKTFYGRPNWNN-EFKQIAYNHP-----     | SSSIGVFFCGPK           | 538 |
| Hs-Nox1    | QKTSFGRPMWDN-EFSTIATSHP-----     | KSVVGVFLCGPR           | 534 |
| Lg-Nox2    | HKTHYGRPQWDK-IFSDLAVPHK-----     | GMKLGVFCCGPK           | 534 |
| Nv-Nox2A   | QKTRFGRPEWVK-IFNDIGNKHP-----     | KTDIGVFCCGPK           | 533 |
| Nv-Nox2B   | ARTKYGRPEWAK-IFNEVAEAHN-----     | QTSVGVFFCGPS           | 526 |
| Ci-Nox2    | QKTNFGRPNWDE-IFSKTARDYP-----     | NTHIGVFFCGVA           | 554 |
| Sp-Nox2A   | QKTHYGRPKWDS-NFKMIAEENPG-----    | RVS-----SVFFCGPK       | 552 |
| Sp-Nox2B   | QKTHYGRPKWDS-NFSYIAEKNP-----     | RVSRIWNATIGVFFCGPK     | 532 |
| Mb-Nox2    | HKMNFGRPNWDS-EFTSVANTHA-----     | GNNIGLFFCGPK           | 582 |
| Hs-Nox4    | SRLF IGRPRWKL-LFDEIAKYNR-----    | GKTGVVFCCGPN           | 550 |
| Nv-Nox4    | ARLTHGRPDWFQ-IFRRVQENP-----      | KTCVGVFYCGAR           | 546 |
| Lg-Nox4    | PRTMFHRPDWAN-VLSSVSHLHC-----     | RKTVDVFCGPK            | 474 |
| Dd-NoxA    | TPTQFGRPKWDE-IFADHALRYAEK-----   | DVGVFCCGPK             | 489 |
| Dd-NoxB    | SKTLFGRPNFRS-IFNQLQLHQRE-----    | KIGVFYCGNK             | 490 |
| Ng-NoxA    | SKRNFGRPNWDA-EFSDIRRYVEKNS-----  | SGAKKPNVGVFCGPG        | 561 |
| Os-rboh-C  | VKTHFARPNWRS-VFKKVAVSHE-----     | NQRVGVFYCGEP           | 540 |
| Os-rboh-G  | VRTHFARPSWRD-VFKRVAVNHQ-----     | GQRVGVFFCGDQ           | 505 |
| At-rboh-D  | VKSHFAKPNWRQ-VYKKAIVQHP-----     | GKRIGVFYCGMP           | 532 |
| Os-rboh-A  | VRTHFARPNWRK-VLSKISSKHP-----     | YAKIGVFYCGAP           | 552 |
| Os-rboh-B  | VRTHFARPNFKK-VLSKIASKHP-----     | YAKIGVFYCGAP           | 552 |
| Os-rboh-D  | VRTHFARPNWKE-VFTRIASKHP-----     | NSTVGVFYCGAP           | 565 |
| Os-rboh-H  | VRTHFARPNWKE-VFTRIASKHP-----     | NSTVGVFYCGKP           | 609 |
| Os-rboh-E  | IRTHFARPNWRK-VFSDLANAHK-----     | NSRIGVFYCGSP           | 541 |
| Os-rboh-F  | IRTHFARPNWRK-VFSDLANAHQ-----     | NSRIGVFYCGSP           | 542 |
| mPp-rboh-A | ARTHFARPNWKS-VFSGLTATHQ-----     | DKRIGVFYCGPA           | 540 |
| mPp-rboh-C | ARTHFARPNWKS-VFSKLAATHQ-----     | EKRIGVFYCGPV           | 546 |
| mPp-rboh-B | ARTHFARPNWKD-VFANLFTTHP-----     | EKRIGVFYCGPA           | 527 |
| mPp-rboh-D | ARTHFARPNWKN-VFTNMADTHP-----     | NKRIGVFYCGPA           | 551 |

|           |                                                             |     |
|-----------|-------------------------------------------------------------|-----|
| Ps-rboh-B | QLTHFGRPDWDK-VFSEAKANHP-----GEEVGVFYCGPH                    | 503 |
| Ps-rboh-C | QLTHFGRPDWER-VFSDASAKHP-----GEEVGVFCCGPH                    | 492 |
| Ps-rboh-A | QRTRFGRPDWNA-ELSRVAQNHRRL-----PLEDGDGEREEIGVFFCGPH          | 517 |
| Hs-Duox1  | SITHFGRPPFEP-FFNSLQEVHPQV-----RKIGVFSCGPP                   | 487 |
| Hs-Duox2  | SITHFGRPPFEP-FFNSLQEVHPQV-----RKIGVFSCGPP                   | 487 |
| Lg-Duox1  | ATTHFGRPKFQD-FLLSLAHEHDGV-----PQVGVFSCGPP                   | 495 |
| Lg-Duox2  | AVTHFGRPKMED-FLHSLHHEYPEV-----ERFGVFSCGPG                   | 494 |
| Lg-Duox3  | ATTHFGRPQLNN-IMTAVNRAHPMT-----RKIGVFSCGPP                   | 497 |
| Dp-Duox   | AVNHFGRPDMTS-FLKFVQKKHSYV-----SKIGVFSCGPR                   | 497 |
| Cb-Duox   | AKNHFGRPNFKT-FFQFIQNEHKEQ-----SEIGVFSCGPN                   | 499 |
| Mg-NoxC   | NPTQFGRPDFVSILDRHYDDMRKYKAGLVARASRGGGGEDDAASVADDEVKGVFFCGTP | 605 |
| Fg-NoxC   | NPTHFGRPDFDLILDEHYEEMLKFRASKRTSTR---NKEDENYEDEELKGVFYCGAP   | 580 |
| Cm-NoxD2  | GRGKPGAPASIR-RFQRTRAFSN-----KVHHGIFFCGPP                    | 538 |
| Cm-NoxD1  | FERLFGNI IQVK-QFNRVSGFSN-----DVQRGIFFCGPN                   | 511 |
| Pt-NoxD   | HILTAGRPDWDALLAEALEKAHTSHP-----EGDAVGVFFCGAP                | 520 |
| An-Fre1   | IHFCNGRPDIRGAVENAEIARECS-----TRLGVLCGSPG                    | 720 |
| Sc-Fre1   | VECLNKRPDLELVRSEIKLSELEN-----NNITFYSCGPA                    | 655 |

\*

|           |                                              |     |
|-----------|----------------------------------------------|-----|
| Dp-Nox5A  | ELSKVLKKKC-----NKFGFNHKEIF-----              | 717 |
| Dp-Nox5B  | QLAKELRKKC-----NEFDGFGSKEIF-----             | 718 |
| Hs-Nox5   | ALAKVLKGHC-----EKFGFRFFQENF-----             | 534 |
| Lg-Nox5A  | ALAKDLKEKS-----DKFGFDFTKENF-----             | 561 |
| Lg-Nox5B  | VVGKAIKEHC-----AKFKFGFRKENF-----             | 563 |
| Dd-NoxC   | QLSKELYEKCRYTCL-----KTGGTKFYFHKENF-----      | 575 |
| Mg-NoxA   | AAARDIKAACKTASVN-----EVEFRFWKEHF-----        | 580 |
| Fg-NoxA   | AAARDIKLACKAATVP-----DVDFRFWKEHF-----        | 557 |
| Cc-NoxA   | VLAKAIKEATIKNTNA-----NVEFSFAKEHF-----        | 557 |
| Lb-NoxA   | ALAKAIKDATVSHNTS-----NVEFTFAKEHF-----        | 551 |
| fPp-NoxA  | VMAKAIKEACVASTTP-----NINFTFAKEHF-----        | 557 |
| Pg-NoxA   | PLAKTLEQECRQATD-----KVKFEFHKERSVDSSTFMNPLECA | 561 |
| Bd-NoxA   | ALAKVIKKHADQASDN-----RVKFLVRKEHF-----        | 503 |
| Mg-NoxB   | GLGSTLHIFCNKYS-----EPDFAFVWGKENF-----        | 525 |
| Fg-NoxB   | GLGSSLHTYCNYT-----EPGFSFVWGKENF-----         | 528 |
| Cc-NoxB   | PLSKTLHSMCNKYS-----TPKGTRFFYGKENF-----       | 534 |
| Lb-NoxB   | VLSKQLHQMSNKYS-----DPKGTRFFFGKENF-----       | 547 |
| fPp-NoxB  | VLSKQLHISCNKYS-----SPSGTKFFFGKENF-----       | 536 |
| Pg-NoxB   | PLGHSLHLQCNCWTGG-----TDNDRTRFFWGKENF-----    | 532 |
| Bd-NoxB   | VLSRTLHHTCNKWTEA-----TEDGTRFYFGKENF-----     | 493 |
| Hs-Nox2   | ALAEATLSKQSLNSSES-----GPRGVHIFNKENF-----     | 570 |
| Hs-Nox3   | ALSRTLQKMCHLYSSA-----DPRGVHFYFNKESF-----     | 568 |
| Hs-Nox1   | TLAKSLRKCCHRYSSL-----DPRKVQFYFNKENF-----     | 564 |
| Lg-Nox2   | SLSTSLHSLCNKHS-T-----ESVGRFYFNKENF-----      | 563 |
| Nv-Nox2A  | ALSHTLHKMS-NAHSR-----DGDGAKFYFNKENF-----     | 562 |
| Nv-Nox2B  | GLSHELHKMC-TQSCD-----ETKGVRFYFNKENF-----     | 555 |
| Ci-Nox2   | ALSAKLHKMS-NKHS-----GGGVYFHYFNKENF-----      | 581 |
| Sp-Nox2A  | ALSSVLHENANKFTSL-----TPDGAFFYFNKENF-----     | 582 |
| Sp-Nox2B  | SLSTLHQSCNKHTSD-----ESDGRFYFNKENF-----       | 562 |
| Mb-Nox2   | VLSQLHVTCNKFTSER-----AAEGTKFYFNKENF-----     | 613 |
| Hs-Nox4   | SLSKTLHKLNSQNNYS-----GTRFEYNKESFS-----       | 578 |
| Nv-Nox4   | GPSSMLRRCQRMKN-----GASFVNKEVSA-----          | 574 |
| Lg-Nox4   | QLIYDVRKITLKCCNK-----TNRFLLFEESEF-----       | 501 |
| Dd-NoxA   | LLSKSLYKASTHYTKT-----TTCRFHYFNKENF-----      | 517 |
| Dd-NoxB   | ALGNKNIKCNKFNKGK-----NNCHLIFHKNENF-----      | 518 |
| Ng-NoxA   | GLSKQVYSYAVDKSKN-----STVQFVFNKENF-----       | 589 |
| Os-rboh-C | VLVPQLRQLSADFT-----HKTNTRFDHKNENF-----       | 568 |
| Os-rboh-G | ALTPELRRLAQDFS-----HKTTTKFVFNKENF-----       | 533 |
| At-rboh-D | GMIKELKNLALDFS-----RKTTKFDFHKNENF-----       | 560 |
| Os-rboh-A | VLAQELSKLCHEFN-----GKCTTKFEFHKEHF-----       | 580 |
| Os-rboh-B | VLAQELSDLCHDFN-----GRCTSKFEFHKEHF-----       | 580 |
| Os-rboh-D | TLAKELKTLSEMS-----HRTGTRFHFHKEYF-----        | 593 |
| Os-rboh-H | TLAKELKKLSLDMS-----HKTTTRFHFHKEYF-----       | 637 |
| Os-rboh-E | TLTKQLKDLSEFS-----QTTTTRFHFHKNENF-----       | 569 |
| Os-rboh-F | TLTKMLRDLSEFS-----QTTTTRFHFHKNENF-----       | 570 |



|            |                                                   |     |
|------------|---------------------------------------------------|-----|
| mPp-rboh-A | ALANELENLSRSYT-----QTSSTKFSFHKENF-----            | 568 |
| mPp-rboh-C | TLANELENLSRTYT-----QKSSTKFSFHKENF-----            | 574 |
| mPp-rboh-B | ALVNELETLSRTYT-----KESSTKFSFHKENF-----            | 555 |
| mPp-rboh-D | SLVNELKTLSKAFT-----KKS-TKFFFHKENF-----            | 578 |
| Ps-rboh-B  | ALEEILDNTCKRYSSS-----DPNGTIFDFHSEKFS-----         | 534 |
| Ps-rboh-C  | ELEEVLAVCKKYTSS-----KADGTVDFHSEKFA-----           | 523 |
| Ps-rboh-A  | PLGNVIDEQCARLNQT-----VPD-VEFAFHSENF-----          | 546 |
| Hs-Duox1   | GMTKNVEKACQLINRQ-----DRTHFSHHYENF-----            | 515 |
| Hs-Duox2   | GMTKNVEKACQLVNRQ-----DRAHFMHHYENF-----            | 515 |
| Lg-Duox1   | PMTSNVDKACSSLNKL-----EGPTYVHHFENF-----            | 523 |
| Lg-Duox2   | PMTNSVQAACLLNSI-----EGPTYCHHFENF-----             | 522 |
| Lg-Duox3   | GVTKGVERACVDASKS-----TKAIFEHHYENF-----            | 525 |
| Dp-Duox    | PLTKSIMSACEEVNQVR-----KLPYFIHHFENFG-----          | 527 |
| Cb-Duox    | NLNEKIAEGCAEANRQR-----DAPSFARFETF-----            | 528 |
| Mg-NoxC    | IVGEILADRCKALTARGRHDGS-----KIEYHFMIEVFN-----      | 639 |
| Fg-NoxC    | VVGEILADKRELTLRGWQDGI---HELGRIEWLVNYDGYDDHIN----- | 622 |
| Cm-NoxD2   | SVVRSVHQSIRAVAAARAA-----RGLPQRNVFFMKENF-----      | 572 |
| Cm-NoxD1   | ALGASVRRAMHKVQRQPER-----LGT-KKPILFIQERF-----      | 544 |
| Pt-NoxD    | AIARTLQRTAHKVTAQHHYTVRRATGTACRCRVLVHKENF-----     | 560 |
| An-Fre1    | MMADECLAVYEAMRR-----GCRGIRYFEEAFTW-----           | 750 |
| Sc-Fre1    | TFNDDFRNAVVGIDS-----SLKIDVELEESFTW-----           | 686 |
