# Supplementary material for: Molecular evolution of Phox-related regulatory subunits for NADPH oxidase enzymes
Source: PubMed Central journal article supplement (PMC2121648; doi:10.1186/1471-2148-7-178), 2007-09-27
Supplement: 1471-2148-7-178-S8.pdf [file 1471-2148-7-178-S8.pdf]

## Additional File 8

**Alignment of characteristic domains of putative regulatory subunit proteins of *L. gigantea* (p47phox-, p67phox-, p22phox-like proteins), *N. vectensis* (p47phox-, p22phox-like proteins), and *M. brevicollis* (p47phox-, p22phox-like proteins).** The following naming was used to describe species of the sequences: Lg (*L. gigantea*), Nv (*N. vectensis*), Mb (*M. brevicollis*). Human (Hs, *H. sapiens*) and sea urchin (Sp, *S. purpuratus*) sequences were used as references.

**Alignment of PX, bis-SH3 domains, and predicted AIR-like region of p47phox-like sequences.** *Gray boxes* indicate the predicted domains corresponding to the PX (residues 3-132) and bis-SH3 (residues 151-285) domains of human p47phox. *Yellow boxes* indicate the predicted motif corresponding to the crucial residues of the AIR (residues 299-305 of human p47phox) containing a putative phosphorylation site by PKC (*bold letter*) consistent with a PKC substrate consensus motif (R/K-x-S/T-x-R/K). Polybasic region of *N. vectensis* is indicated by *underline*.

|            | PX-domain                                                     |     |
|------------|---------------------------------------------------------------|-----|
| Hs-p47phox | -----MGDTFIRHIALLGFEKRFVPSQHYVYMFLVKWQDLSEKV                  | 39  |
| Nv-p47phox | -----MTKRTIKDVKIVDVQKRKIPSKHYVYVSVTWSDGSVNV                   | 39  |
| Sp-p47phox | -----MGKRTVVNANVTDIEKRREPTKHVYVYI IHVTWSDGSVNV                | 39  |
| Lg-p47phox | MFLIYLSIRDDTYITFSIQTYIKFLSVFDSHTITFYIRRLCYIFQVYVIFVTWSDSGTYY  | 60  |
| Mb-p47phox | -----MAKFVKNVTVIDYQRRRAPSKHYVYVITVVWSDGSEVT                   | 38  |
|            |                                                               |     |
| Hs-p47phox | VYRRFTEIYEFHKTLEKEMFPIEAGAINPENRIIPHLPAKWFDFG---QRAAENRQGTLTE | 96  |
| Nv-p47phox | VYRRYSKFFDLQTKLLEEFPEDEGGVKDPSARVLPFLPGKILFGRSHVRDVAVKRKEPIQE | 99  |
| Sp-p47phox | VYRRYSTFFDFQNKLLSKFPPEEAGANNPSSRCIPFLPGKILFGRSHIREVALKRLSPIDE | 99  |
| Lg-p47phox | VYRRYSRFFDFQSALLDKFPIEGGSIDPESRIIPFLPGKIIFGRSHIRDVAVKRLGPIND  | 120 |
| Mb-p47phox | IYRRYSQLFEFHTSLLDRLFPEAAGATG--EERIIPFLPGKILFGRSHTHKVAQSRAPIDE | 97  |
|            |                                                               |     |
| Hs-p47phox | YCGTLMSLPTKISRCPHLLDFFKVRPDDLKLPDNTQTKKPETYLMPKDGKSTATDITG--  | 154 |
| Nv-p47phox | YCSKLVLPKISQSGLVLFKFFPKPEDIELPLEKK---KKKKKTADV--ISDPV-----    | 149 |
| Sp-p47phox | YCTALVKLPGKISDSKEVINFFTPEDVSPSPDGGESTRGRADIGNISEPI-----       | 153 |
| Lg-p47phox | YCKAVIALPPKISQCEEVLDFFEVETDDLDPKAEKKKKDEGAKKAENISDPK-----     | 174 |
| Mb-p47phox | YLVKLVISLPAELSRCDLALFELFEATNTDIAPPSEQERERRPTGIFKKLSKSDSGKEERE | 157 |

| <b>bis-SH3 domain</b>            |                                                                        |
|----------------------------------|------------------------------------------------------------------------|
| Hs-p47 <i>phox</i>               | -----PIILQTYRAIANYEKTSGSEMALSTGDDVVEVVEKSESGWWFCQMKAKRGWIPASF 209      |
| Nv-p47 <i>phox</i>               | -----SLEQYVAIADYQKQNRNEITMVAGDIVEIDKNENGGWVFNLDDEEQGWVPAAY 202         |
| Sp-p47 <i>phox</i>               | -----QAEQYIVVADYKQKQKNEVELTAGDLVEVFEKNDNGWVFTVHDQHGWAPGTF 206          |
| Lg-p47 <i>phox</i>               | -----TLTQYRVTCDYEKQDRGEIDLEAGMIVEVAEKSETGWWFVNSDDAQGWVPSTY 227         |
| Mb-p47 <i>phox</i>               | ISVGDVMVLDQYRAVADYTKQDRKELSFKTGDI FEVVEKNDNGWVFNDSAS----- 210          |
|                                  |                                                                        |
| Hs-p47 <i>phox</i>               | LEPLDSPDETEDP--EPNYAGEPYVAIKAYTAVEGDEVSLLEGEAVEVIHKLLDGGWVIR 267       |
| Nv-p47 <i>phox</i>               | LESVDGHSDDAAPIEGPTVEVGQYITTTSHKAELDDEITFETGVIVSVIQKNFDGWWLIR 262       |
| Sp-p47 <i>phox</i>               | LQNPDGQEEDEETLIPGNDE-SYITNNAYQGQAEDEISFETGVVTVIQKSLDGGWVKVS 265        |
| Lg-p47 <i>phox</i>               | LEPADGSTTDNVVLAQPGQEEKFICIEMFQSNNGNDEISLEKGA VVEVLEKNLSGWWLVR 287      |
| Mb-p47 <i>phox</i>               | -----QDEKYITTAAYAASSDDEIGYEKGVVVRVLEKLLDGGWVQVE 251                    |
|                                  |                                                                        |
| Hs-p47 <i>phox</i>               | KDDVTGYFPSMYLQK----- 282                                               |
| Nv-p47 <i>phox</i>               | YQKKEGWAPAMYL RKPDP-PS---QLHAAQAVG-----GLPSKDRVG-AVTAPAAVRPG 310       |
| Sp-p47 <i>phox</i>               | YQGKQGWAPATFLQIYKGPSGVT PKHPTQSIGNVMLLKSGSDSKPKPGPGSGSRPQPP 325        |
| Lg-p47 <i>phox</i>               | HQKKEGFAPATYLNKTEDQFAV-SLAKRKS LDVEIITNLSDISNIMKGDSPRNSLASTET 346      |
| Mb-p47 <i>phox</i>               | YQKGVGWTGPTFLKRIENS NAG-----PTTLKSTPASST 284                           |
|                                  |                                                                        |
| <b>predicted AIR-like region</b> |                                                                        |
| Hs-p47 <i>phox</i>               | -----SGQDVSQAQRQIKRGA <b>PPRRSSIR</b> NVHSIHQRSRKRLSQDAYRRNSV----- 329 |
| Nv-p47 <i>phox</i>               | VNPVTDRCCKTINFKAETETVVT <b>RKRKAH</b> SVNVYGGKIEAMPALKSP----- 357      |
| Sp-p47 <i>phox</i>               | VQPRDEPGLYSNYDAE--VKPT <b>PPRRATVK</b> KSVRRGGVVRQTKPKLKK----- 373     |
| Lg-p47 <i>phox</i>               | PKPVTEMYSKVKSRSRLERGGNIK <b>PPPRQSMR</b> MVSLSF TSPSPSHK----- 390      |
| Mb-p47 <i>phox</i>               | AATNGGVVPPAKPPAPQLRNEKE <b>PPPRRESIR</b> RPVSIHSGPFAEIERAR----- 334    |

### Alignment of TRP and AD-like regions of p67*phox*-like sequences

Gray and yellow boxes indicate predicted motifs corresponding to the tetratricopeptide repeat (TPR, residues 6-153) and activation domain (AD, 196-210 residues) of human p67*phox*. Red letters indicate the amino acid residues corresponding to the two residues (D67 and R102 of human p67*phox*) crucial for binding to Rac.

| <b>TPR</b>         |                                                                   |
|--------------------|-------------------------------------------------------------------|
| Lg-p67 <i>phox</i> | MSLKQNIILWAEAVKLYEDGDLIECLEQLNKVN-VSAKIRYNGGIVNSRLGNSDKAIEYL 59   |
| Hs-p67 <i>phox</i> | MSLVEAISLWNEGVLAAADKKDKWKGALDAFSAVQDPSRRCFNIGCMYTI LKNMTEAEKAF 60 |
|                    |                                                                   |
| Lg-p67 <i>phox</i> | SQALQLDSFMSVAYFQRGLLFFDLHRYNEAEKDLED SLINLRGSMVIDYKQLGLYTLHL 119  |
| Hs-p67 <i>phox</i> | TRSINRDKHLAVAYFQRGMLYYQTEKYDLAIKDLKEALIQLRGNQLIDYKILGLQFKLFA 120  |
|                    |                                                                   |
| Lg-p67 <i>phox</i> | AQVLYNLAVIKKFKG---DVNGFELYSTKFNPNFNTL FSSVNTKLFNTVNV--LRPLY 174   |
| Hs-p67 <i>phox</i> | CEVLYNIAFMYAKKEEWKKAEEQLALATSMKSEPRHSKIDKAMECVWKQLYEPVVIPVG 180   |

|                    |                                                |     |
|--------------------|------------------------------------------------|-----|
|                    | <b>predicted AD</b>                            |     |
| Lg-p67 <i>phox</i> | NIFCPPKGYVSNLLK <b>KDFLGKSEVVS</b> VEDND-----  | 206 |
| Hs-p67 <i>phox</i> | KLFRPNERQVAQLAK <b>KDYL</b> GKATVVASVVDQD----- | 212 |

### Alignment of p22*phox*-like sequence

Gray boxes indicate the amino acid sequences corresponding to the polybasic region (basic, residues 55-61 of human p22*phox*), predicted 1<sup>st</sup> and 2<sup>nd</sup> transmembrane segments (TM1-TM2, residues 91-120 of human p22*phox*). Proline-rich region (PRR, residues 151-164 of human p22*phox*) are indicated by yellow boxes.

|                    |                                                                          |              |
|--------------------|--------------------------------------------------------------------------|--------------|
|                    |                                                                          | <b>basic</b> |
| Lg-p22 <i>phox</i> | MGKIEWAMWANEQAIASSAVVLLGGIIAVAGQFPNWPFGAYGIVAGILVALLEYPRSKRQ             | 60           |
| Nv-p22 <i>phox</i> | MGHTIEWAMWANEQGVITSFVLALGGTLGVAGMFKKYEFGAYSIALGVLVFLIEYPRGKRK            | 60           |
| Hs-p22 <i>phox</i> | MGQIEWAMWANEQALASGLILITGGIVATAGRFTQWYFGAYSIVAGVFVCLLEYPRGKRK             | 60           |
| Mb-p22 <i>phox</i> | -----GVLVLFVEWPRSARL                                                     | 15           |
|                    | <b>TM1-TM2</b>                                                           |              |
| Lg-p22 <i>phox</i> | NGK-CVERK <b>FQRPLSRVVQCCGLITRNYFVRFV</b> FYLLLVTPCCFILPTLLGGMCFEFTSI    | 119          |
| Nv-p22 <i>phox</i> | QGKKTQERSYQRCLTRLVSLGIVGRNYYIRFV <b>FYLLS</b> CIPCCFFLPTILGGFSLFFTSI     | 120          |
| Hs-p22 <i>phox</i> | KGS-TMERWGQKYMTAVVKLFGPFTRNYYVRAVLHLLSV <b>PAGFL</b> LATILGTACLAIASG     | 119          |
| Mb-p22 <i>phox</i> | KGS-TIPRLYQYSIANIVDKLGPVARNYFARA <b>IFWLGAS</b> IPCFFVFPALAGALTLAVGAL    | 74           |
|                    | <b>PRR</b>                                                               |              |
| Lg-p22 <i>phox</i> | IYFVA <b>AIK</b> GEWKPVLEDYKP-SQGPTVIEA <b>PRHPPPRHPP</b> THNPN-----     | 164          |
| Nv-p22 <i>phox</i> | IYLCAALSGEKWQPCLDKADRTPGINPSHH <b>PTVPPPRN</b> PRSQSLDNLGV-----          | 170          |
| Hs-p22 <i>phox</i> | IYLLAAVRGEQWTPIEPKRER <b>PQIGGTIKQPPSNPP</b> PRPPAEARKKPSEEEAAVAAGGP     | 179          |
| Mb-p22 <i>phox</i> | VYFLAA <b>AFK</b> GEVWVKLE <b>PQKER</b> ---ARGKV <b>YEAP</b> TRAPPR----- | 110          |
| Lg-p22 <i>phox</i> | -RASEV-----                                                              | 169          |
| Nv-p22 <i>phox</i> | -SSSSVNRV-----                                                           | 178          |
| Hs-p22 <i>phox</i> | PGGPQVNP <b>IPVT</b> DEVV                                                | 195          |
| Mb-p22 <i>phox</i> | -----                                                                    |              |
