# Supplementary material for: Molecular evolution of Phox-related regulatory subunits for NADPH oxidase enzymes
Source: PubMed Central journal article supplement (PMC2121648; doi:10.1186/1471-2148-7-178), 2007-09-27
Supplement: 1471-2148-7-178-S11.pdf [file 1471-2148-7-178-S11.pdf]

## Additional File 11

### Alignment of vertebrate p47phox, vertebrate NOXO1, chordate SH3PXD2

proteins, and 47phox-like proteins. *Gray boxes* indicate the predicted domains

corresponding to the PX (residues 3-132) and bis-SH3 (residues 151-282) domains of

human p47phox. *Blue boxes* indicate the predicted C-terminal SH3 domains of human

SH3PXD2a and 2b. *Red letters* indicate the characteristic amino acid residues of human

p47phox PX domain (Arg-42, Pro-73, and Arg-90). Abbreviations: Hs (*H. sapiens*), Cf

(*C. familiaris*), Rn (*R. norvegicus*), Mm (*M. musculus*), Gg (*G. gallus*), Xt (*X.*

*tropicalis*), Dr (*D. rerio*), Tr (*T. rubripes*), Tn (*T. nigroviridis*), Ol (*O. latipes*), Ci (*C.*

*intestinalis*), Sp (*S. purpuratus*), Lg (*L. gigantea*), Nv (*N. vectensis*), Mb (*M.*

*brevicollis*).

|             | PX-domain                                          |    |
|-------------|----------------------------------------------------|----|
| Hs-p47phox  | -----MGDTFIRHIALLGFEKRFVPSQHY-----                 | 24 |
| Mm-p47phox  | -----MGDTFIRHIALLGFEKRFIPSQHY-----                 | 24 |
| Rn-p47phox  | -----MGDTFIRHIALLGFEKRFVPSQHY-----                 | 24 |
| Cf-p47phox  | -----MGDTFIRHIALLGFEKRFVPSQHY-----                 | 24 |
| Gg-p47phox  | -----VGDTFIRHIELLRYEKRFPSQHY-----                  | 24 |
| Xt-p47phox  | -----MTEPHIRHIQLLGFEKRFIPSQHY-----                 | 24 |
| Tn-p47phox  | -----MADTYVRHVQLLGFEKRFPSQHY-----                  | 24 |
| Tr-p47phox  | -----MAETYVRHVQLLGFEKRFPSQHY-----                  | 24 |
| Ol-p47phox  | -----MEDVYVRHVELLGEKRFPTQHF-----                   | 24 |
| Dr-p47phox  | -----MAETYVRHVELLGEKRFPSQHY-----                   | 24 |
| Mm-SH3PXD2a | -----MLAYCVQDATVVDVEKRRNSPKHY-----                 | 24 |
| Rn-SH3PXD2a | -----MLAYCVQDATVVDVEKRRNSPKHY-----                 | 24 |
| Hs-SH3PXD2a | -----MLAYCVQDATVVDVEKRRNSPKHY-----                 | 24 |
| Gg-SH3PXD2a | -----MSSNIYKFTITTEKYKVVYVDEKQSAMCCYYPKQSGWQLQARGFH | 44 |
| Xt-SH3PXD2a | -----MLSFVVLVSVQGVQKRRNSPKHY-----                  | 24 |
| Dr-SH3PXD2a | -----                                              |    |

|                 |                                                              |     |
|-----------------|--------------------------------------------------------------|-----|
| Tr-SH3PXD2a1    | -----VLDVKVVDVEKRRSPSKHY-----                                | 19  |
| Tr-SH3PXD2a2    | -----VLDVNVVDVQKRRNPSKHY-----                                | 19  |
| Hs-SH3PXD2b     | -----MPPRRSIVEVKVLDVQKRRVPNKHY-----                          | 25  |
| Cf-SH3PXD2b     | -----                                                        |     |
| Mm-SH3PXD2b     | -----MPPRRSIVEVKVLDVQKRRVPNKHY-----                          | 25  |
| Rn-SH3PXD2b     | -----MPPRRSIVEVKVLDVQKRRVPNKHY-----                          | 25  |
| Gg-SH3PXD2b     | -----MGPLE-----                                              | 5   |
| Dr-SH3PXD2b     | -----MPRRTVLEVTVQDVQKRRNPNKHY-----                           | 24  |
| Lg-p47phox-like | MFLIYLSIRDDTYITFSIQTYIKFLSVFDSTHITFYIRRLCYIFQ-----           | 45  |
| Ci-SH3PXD2      | -----MSQIPKRLITAVNVNRAEKRRVPSKHY-----                        | 27  |
| Ci-p47phox      | -----MVNRTLKSVKVIDIEKRRLPSKHY-----                           | 24  |
| Sp-p47phox      | -----MGKRTVVANVTDIEKRREPTKHY-----                            | 24  |
| Nv-p47phox-like | -----MTKRTIKDVKIVDVQKRKIPSKHY-----                           | 24  |
| Mb-p47phox-like | -----MAKFVKNVTVIDYQRRRAPSKHY-----                            | 23  |
| Hs-NOX01        | -----MAGPRYPVSVQGAALVQIKRLQT-----                            | 23  |
| Cf-NOX01        | -----MAGSRHPVSVRAAALVQTGRLQT-----                            | 23  |
| Mm-NOX01        | -----MASPRHPVSAHAVALVQMDRLQT-----                            | 23  |
| Rn-NOX01        | -----MASPRHPVSAHAVALVQMERLQT-----                            | 23  |
| Gg-NOX01        | -----                                                        |     |
| Xt-NOX01        | -----                                                        |     |
| Dr-NOX01        | -----LIKLFIRRVVHRNMDINIHSPPQ-----                            | 24  |
| Ol-NOX01        | -----PADTHMSLSVSAAGSDKWLLPSDDRKY-----                        | 27  |
| Tn-NOX01        | -----METQRYPISARLVGVLHKEKSKVGAHKSQVVLFHARFNQQLCPLQ-----      | 45  |
|                 |                                                              |     |
| Hs-p47phox      | -----VYMFLVKWQDLSEKVVYRRFTEIYEFHKTLKEMFPIEAGAINPENRIIP       | 73  |
| Mm-p47phox      | -----VYMFLVKWQDLSEKVVYRKFTIYEFHKMLKEMFPIEAGEIHTENRVIP        | 73  |
| Rn-p47phox      | -----VYMFLVKWQDLSEKVVYRKFTIYEFHKMLKEMFPIEAGEIHTENRVIP        | 73  |
| Cf-p47phox      | -----VYMFLVKWHDLSEKVVYRRFTEIYEFHKMLKEMFPIEAGDINPENRIIP       | 73  |
| Gg-p47phox      | -----VYMFLVKWDLSEKLIYRRFTDIYEFHKALKEMFPIESGDINAENRIIP        | 73  |
| Xt-p47phox      | -----VYFMVKWQDLTEKLVYRKFTIYEFHKSLEKEMFPIEAGDISKEHRTIP        | 73  |
| Tn-p47phox      | -----VYMLLVKWSLDEKLIYRYPEIYTFHKALKEMFPIEAGKIEKRDRIP          | 73  |
| Tr-p47phox      | -----VYMLLVKWSLDEKLIYRYPEIYTFHKALKEMFPIEAGKIEKRDRIP          | 73  |
| Ol-p47phox      | -----VYMLLVKWSQSEKLIYRYPEIHTFHKSLEKEMFPIEAGQIEAKDRIP         | 73  |
| Dr-p47phox      | -----VYMLLVKWSQSEKLIYRRYPEVHTLHKLKEMFPIEAGDIDEKDRIP          | 73  |
| Mm-SH3PXD2a     | -----VYIIRVTWSDSTSQTIIYRRYSKFFDLQMQLLDKFPIEGGQKDPKQRIIP      | 73  |
| Rn-SH3PXD2a     | -----VYIIRVTWSDSTSQTIIYRRYSKFFDLQMQLLDKFPIEGGQKDPKQRIIP      | 73  |
| Hs-SH3PXD2a     | -----VYIIRVTWSDSTSQTIIYRRYSKFFDLQMQLLDKFPIEGGQKDPKQRIIP      | 73  |
| Gg-SH3PXD2a     | WRSLYAWGFLKVVYIIRVTWSDLSQIIYRRYSKFFDLQMQLLDKFPIEGGQKDPKQRIIP | 104 |
| Xt-SH3PXD2a     | -----VYIIRVTWSDSTSQVIYRRYSKFFDLQMQVLDKFPIEAGQKDPKQRIIP       | 73  |
| Dr-SH3PXD2a     | -----MAVYR-----GQATG-----                                    | 10  |
| Tr-SH3PXD2a1    | -----VYLINVTYSNTSHIVYRRYSKFFDLQMQILDKFPIEGGQKDPKQRIIP        | 68  |
| Tr-SH3PXD2a2    | -----VYLINVTYSNTSHIVYRRYSKFFDLQMQILDKFPIEGGQKDPKQRIIP        | 68  |
| Hs-SH3PXD2b     | -----VYIIRVTWSSGSTEAIYRRYSKFFDLQMQMLDKFPIEGGQKDPKQRIIP       | 74  |
| Cf-SH3PXD2b     | -----VYIIRVTWSSGSTEAIYRRYSKFFDLQMQMLDKFPIEGGQKDPKQRIIP       | 49  |
| Mm-SH3PXD2b     | -----VYIIRVTWSSGSTEAIYRRYSKFFDLQMQMLDKFPIEGGQKDPKQRIIP       | 74  |
| Rn-SH3PXD2b     | -----VYIIRVTWSSGSTEAIYRRYSKFFDLQMQMLDKFPIEGGQKDPKQRIIP       | 74  |
| Gg-SH3PXD2b     | -----VYIIRVTWSSGSTEVIYRRYSKFFDLQMQMLDKFPIEGGQKDPKQRIIP       | 54  |
| Dr-SH3PXD2b     | -----VYIIRVTWSSGSTEVIYRRYSKFFDLQMLDKFPIEGGQKDPKQRIIP         | 73  |
| Lg-p47phox-like | -----VYVIFVTWSDSGTYVVYRRYSRFFDFQSALLDKFPIEGGSIDPESRIIP       | 94  |
| Ci-SH3PXD2      | -----VYVIEVSWDDGSDTVIFRRYSKFFDLQISLLETFPKEGGKDPSTRIP         | 76  |
| Ci-p47phox      | -----VYLIEIKWSDGSLCTVGRRFSAFFMMHMTLLEKFPLEGGKDPKQRIIP        | 73  |
| Sp-p47phox      | -----VYIIRVTWSDGVSNNVYRRYSTFFDFQNKLSKFPPEEAGANNPSSRCIP       | 73  |
| Nv-p47phox-like | -----VYVISVTWSDGVSNNVYRRYSKFFDLQTKLLEEFPEGGVDPKQRIIP         | 73  |

Mb-p47phox-like -----VYVITVVVSDGSEVTIYRRYSQLFEFHTSLLDRFPEAAGATGEE-RIIP 71  
Hs-NOX01 -----FAFSVRWSDGSDTFVRRSWDEFRLKKTLLKETFPVEAGLLRRSDRVLP 71  
Cf-NOX01 -----FAFSVCWSDGSDTFVRRSWAEFKELHKTLLKEAFPVEAGLLRRSDRILP 71  
Mm-NOX01 -----FAFSVCWSDNSDTFVRRSWDEFRLQKTLKKTFFPVEAGLLRRSEQVLP 71  
Rn-NOX01 -----FAFSVCWSDNSDTFARRSWEEFRQLQKTLKKTFFPVEAGLLQRSERVLP 71  
Gg-NOX01 -----YMMFVSWSDQNNILYRTLEEFKRFHKLKRRKFPIESGSLRRSDRTIP 48  
Xt-NOX01 -----WSDHNEILYRTFEDFKLNRQLKKTFFLEAGLFRKSDNLLP 42  
Dr-NOX01 -----LYMTTVLWSDGNEITVYRSLEDFKMKHRQLKKTFFPSN-PFKRSARIVP 72  
O1-NOX01 -----TFMVSGIWSGDSEIIYRSFKDFKFKHDQLKKTFFPNLT-PFRKEDRMLP 75  
Tn-NOX01 -----MYMTSVLWSDHNEIVVYRTFQDFRKMH-KLKRSKGKKS-PTR----- 85

\*

Hs-p47phox **HLPAPK-----WFDGQRAAE---NRQGTLETCYGLTMSLPTKISRCPHLLDFFKVRPDDL** 125  
Mm-p47phox HLPAPR-----WFDGQRAAE---SRQGTLETCYFNGLMGLPVKISRCPHLLDFFKVRPDDL 125  
Rn-p47phox HLPAPR-----WYDGGRAAE---SRQGTLETCYFNSLMGLPMKISRCPHLLNFFKVRPDDL 125  
Cf-p47phox HLPAPR-----WFDGQRAAE---SRQGTLETCYNTLMGLPVKISRCPQLLDFFRVRPDDL 125  
Gg-p47phox HLPAPK-----WFDGQRSTQ---SRQGTLETCYCYTLVNLPHKISRCRHVVSFFFEVVRPDDM 125  
Xt-p47phox HLPAPK-----WFDGLRSTE---NRQVTLSDYFSSLLSLPPKISRCPHVNLFFKVRSDDV 125  
Tn-p47phox SLSAPP-----WLDQKSTE---TRQVTLSDYCYALVNLPPHISRCTHLSLTKVVRPEDE 125  
Tr-p47phox SLSAPP-----WLDQKSTE---TRQVTLSDYCHSLVNLPPHISRCTHLSLTKVVRPEDE 125  
O1-p47phox KLPAPR-----WLESQKSRE---NRKTTLVVDYCHLLVSLPPHISRCNELSNFFKVRPEDE 125  
Dr-p47phox TLPAPK-----WLDNQKTE---TRQATLAECYRSLNLPANISRCQLIRDFKMRPEDE 125  
Mm-SH3PXD2a FLPGKI-----LFRRSHIRDVAVKRLKPIDEYCRALVRLPPHISQCDEVFRFFEARPEDV 128  
Rn-SH3PXD2a FLPGKI-----LFRRSHIRDVAVKRLKPIDEYCRALVRLPPHISQCDEVFRFFEARPEDV 128  
Hs-SH3PXD2a FLPGKI-----LFRRSHIRDVAVKRLKPIDEYCRALVRLPPHISQCDEVFRFFEARPEDV 128  
Gg-SH3PXD2a FLPGKI-----LFRRSHIRDVAVKRLKPIDEYCRALVRLPPHISQCDEVFRFFEARPEDL 159  
Xt-SH3PXD2a FLPGKI-----LFRRSHIRDVAVKRLKPIDEYCRALVRLPPHISQCDEVFRFFEARPDDL 128  
Dr-SH3PXD2a -----RWQGRVG----- 17  
Tr-SH3PXD2a1 FLPGKI-----LFRRSHIRDVAVKRLRFIDYCRALVRLPPQISQSEEVLRFFETKAEDI 123  
Tr-SH3PXD2a2 FLPGKV-----LFRRSHIRDVAVRRLKHLNDYCKALMKLPSQISQSEEVLRFFETKLDL 123  
Hs-SH3PXD2b FLPGKI-----LFRRSHIRDVAVKRLIPIDEYCKALIQLPPYISQCDEVLRFFETRPEDL 129  
Cf-SH3PXD2b FLPGKI-----LFRRSHIRDVAVKRLIPIDEYCKALIQLPPYISQCDEVLRFFETRPEDL 104  
Mm-SH3PXD2b FLPGKI-----LFRRSHIRDVAVKRLIPIDEYCKALIQLPPYISQCDEVLRFFETRPEDL 129  
Rn-SH3PXD2b FLPGKI-----LFRRSHIRDVAVKRLIPIDEYCKALIQLPPYISQCDEVLRFFETRPEDL 129  
Gg-SH3PXD2b FLPGKI-----LFRRSHIRDVAVKRLIPIDEYCKALIQLPPYISQCDEVLRFFETRPDDL 109  
Dr-SH3PXD2b FLPGKI-----LFRRSHIRDVAVKRLKPIDEYCRALVRLPPHISQCDEVFRFFEARPEDL 128  
Lg-p47phox-like FLPGKI-----IFGRSHIRDVAVKRLGPIIDYCKAVIALPPKISQCDEVLRFFEVETDDL 149  
Ci-SH3PXD2 FLPGKI-----LFRRSNIRDVAVKRVLSIGYCKDLIKLPSYIVQHSLLDFFETKPEDL 131  
Ci-p47phox FLPGKI-----LFKRSHTRDVTLKRGLSISEYCESLLLLPEHISQCDELRRFFETSSSDI 128  
Sp-p47phox FLPGKK-----LFGRSHIREVALKRLSPIDEYCTALVKLPGKISDSKEVINFFPTPEDV 128  
Nv-p47phox-like FLPGKI-----LFGRSHIRDVAVKRPKEIQEYCSKLVLPKISQGLVLRFFEPKPEDI 128  
Mb-p47phox-like FLPGKK-----IFGRSHTHKVAQSRAKPIDEYKLVLSLPAELSRCDLALFEATNTDI 126  
Hs-NOX01 KLL-----DAPLLGRVGRTSRGLARLQLLETYSRRLATAERVARSPITGFFAPQPLDL 126  
Cf-NOX01 KLP-----DTSLLVRGGRTGRGLARLRLDLYTRALLAAAEQLSRSVLTGFFEPQPVDL 126  
Mm-NOX01 KLP-----DAPLLTRRGHTGRGLVRLRLDLYVQALLATSEHILRSSALHGGFFVPKPLDL 126  
Rn-NOX01 KLPQACRNAPLLTRRGHTGRGLRLRLLLETYVRSLLATSQHIVTSSTLNSFFAPKPLDL 131  
Gg-NOX01 RFKDING----KQKSGKINRSLERLKLLETYQELLKVDAKISQGEDVIQFFKAQTQDL 104  
Xt-NOX01 KLKDV-----IFRKNRTNRFIERLRLLEKYSQELLRTDGKISQCDLVKFFTPSNNDL 97  
Dr-NOX01 EFKGN-----KWSGSK-SVLRMKALEEYCGQLLKSDAQVCRSELIQFLPKAHD 122  
O1-NOX01 KFNGKAR----RSLKQKSGSKSVKQMEFLESYCDKLLKCDPNVTSSEVTRFFTPKQD 131  
Tn-NOX01 -----SLVRLKFLQKYNELLSCEPRVVSQSADLIQFFHPNAQDL 124

**bis-SH3 domains**

Hs-p47phox **KLPTD-NQTKKPETYLMPKD-GKS-----TATDITGPIILQTYRAIANYEKTSQSE--M** 175

Mm-p47phox KLPTD-SQAKKPETYLVPKD-GKN-----NVADITGPIILQTYRAIADYEKSSGTE--M 175  
Rn-p47phox KLPND-SQVKKPETYLTAKD-GKN-----NVADITGPIILQTYRAIADYEKSGKTE--M 175  
Cf-p47phox KLPTD-SQVKKPETYLVPKD-GKS-----SVTDITGPIILQTYRAIADFEKTSSSQ--M 175  
Gg-p47phox NPVTD-SQIRKPEVFLPKD-AKK-----NTSDITGPIVLQTYRAIADYEKSSKSE--M 175  
Xt-p47phox NPVANNTNGRKPETFLLKVDATAK-----NVSDITGPIILQSYRVIADYEKNSKSE--L 177  
Tn-p47phox NPAAP-NLTKRNETFVVSRLARG-----NASEISGPIILDMYRAIADYTKTKYE--I 176  
Tr-p47phox NPPSP-NILTKRNETFVVSRLARG-----NVSEISGPIILDMYRAIADYTKTKYE--I 176  
O1-p47phox NPPAP-NITKRNETFVVSKEPAQG-----TAAEISGPIILDYRVIADFEKTSKHE--L 176  
Dr-p47phox TPPAP-HPYKRNETFIMSTNRVRSN-----TTSEITGPIILETYRVIADYSKSSKYE--L 177  
Mm-SH3PXD2a NPPKEDYGSSKRKSVWLSSWAESPCKDVT-GADTNAEPMILEQYVVVSNYKQKQENSE--L 185  
Rn-SH3PXD2a NPPKEDYGSSKRKSVWLSSWAESPCKDVT-GADTNAEPMILEQYVVVSNYKQKQENSE--L 185  
Hs-SH3PXD2a NPPKEDYGSSKRKSVWLSSWAESPCKDVT-GADTNAEPMILEQYVVVSNYKQKQENSE--L 185  
Gg-SH3PXD2a NPPKEDYGSSKRKSVWMSLSETPKKSVPAGDASSEPMILEQYVVVSNYKQKQENSE--I 217  
Xt-SH3PXD2a DPPKEDYGSSKRKSVWMSLSEIPKADPK-GADGNSEPIILDQYVVVSNYKQKQENSE--I 185  
Dr-SH3PXD2a -----RGS-AGRWTACFFPSA-----GLDSS-EPMVLEQYVVVANYERQENSE--I 61  
Tr-SH3PXD2a1 NPPVDRSRGSTAGRWTACFFSPP-----GIESS-EPMVLEQYVVVANYERQENSE--I 173  
Tr-SH3PXD2a2 NPPTDRSRGPMAGSWLTACFFPTGP-----GLDAS-DPMLLEQYVVVASYEKQEPAE--I 175  
Hs-SH3PXD2b NPPKEEHIGKKKSGGDQT-----SVDPMVLEQYVVVANYQKQESSE--I 171  
Cf-SH3PXD2b NPPKEEHVGGKKSGGDLT-----SVDPMVLEQYVVVADYQKQESSE--I 146  
Mm-SH3PXD2b NPPKEEHIGKKKSGNDPT-----SVDPMVLEQYVVVADYQKQESSE--I 171  
Rn-SH3PXD2b NPPKEEHIGKKKSGSDPT-----SVDPMVLEQYVVVANYQKQESSE--I 171  
Gg-SH3PXD2b TPPKEEPIGKKKSGADSA-----SVDPLVLEQYVVVANYQKQESSE--I 151  
Dr-SH3PXD2b NPPKEEPSGKKKSGGDSS-----SADPLLLDQYVAVTDYEQKQESSE--I 170  
Lg-p47phox-like DPPKAEKKKKDEGAKKAEN-----ISDPKTLTQYRVTCDYEQKQDRGE--I 193  
Ci-SH3PXD2 K-PPSESTSRASKRNSLD-----ISQPILPESYVVVQDYIKTQPKQ--L 173  
Ci-p47phox ARDTKEKTQSTAVSQIIQD-----ITGPIELETYIAIADYKAEAKTQ--I 171  
Sp-p47phox SPPSPDGGGSTRGRADIGN-----ISEPIQAEQYIVVADYKQKQKNE--V 172  
Nv-p47phox-like ELPLEK--KTKKKTADV-----ISDPVSLQYVAIADYKQKQNRNE--I 168  
Mb-p47phox-like APPSEQERERRPTGIFKLSKSDSGKEE-REISVGDVMVLDQYRAVADYTKQDRKE--L 183  
Hs-NOX01 EPALPPGSRVILPTPEEQPLSRA-----AGRLSIHSLEAQLRCLQPFCTQDTRDRPF 179  
Cf-NOX01 EPVLPPLGSLVILPTPEE-PHRRP-----PHSPAICSLAQLRCLQPFSTQDQGWPF 178  
Mm-NOX01 EPMLPPGSLVILPTPEE-PLSQP-----RGLSDIHSLEAQSIPCVQPFHTLDIRDRPF 178  
Rn-NOX01 EPMLPPGSLVILPTPEE-PLSQP-----IGSLAIHSLEAQSMLRCLQPFHTLDTKDRPF 183  
Gg-NOX01 DPCFPEDSVVIMPSEIGGEKKEVQ---QQQLSITYPQVVSQSYRCIETFETKDTKNKTF 160  
Xt-NOX01 NPKFPENSLVMMTSDSKDQKQKQP---LPEAPAIHPIVSQYICMEDYETKDTKNRPF 153  
Dr-NOX01 NADFAKNCIVIMPSDVTLGSSKA-----ESNSGVTQPFVTETYRCIANYETKDTKNRPF 176  
O1-NOX01 QPDFTKNSSLLLVIYGR-PGALRS-----SGAGNVTHPFVTQTYRCVAPYETRDTKNRPF 184  
Tn-NOX01 EPEFSKNRQEEVKAEGHGSVG-----NVTQPFVTVTYRCVVSQYETKDTKNKPF 173

Hs-p47phox ALSTGDVVEVVEKSESSEGWFFCQMKK-KRGWIPASFLPLDSDPEDETEPEPNYAG----- 228  
Mm-p47phox TVATGDVVDVVEKSESSEGWFFCQMKT-KRGWVPASYLEPLDSDPEAEDPDPNYAG----- 228  
Rn-p47phox TVATGDVVDVVEKSESSEGWFFCQMKT-KRGWVPASYLEPLDSDPEAEDPDPNYAG----- 228  
Cf-p47phox ALATGDVVDVVEKSESSEGWFFCQTKT-KRGWVPASYLEPLDSDPEAEDPEPNYEG----- 228  
Gg-p47phox AVKAGDAVDVVEKSETGWWFCQLKT-KRGWVPAAYLEPMDGPESEEQEPNYAG----- 228  
Xt-p47phox AAKNGDVEIVEKSENGWWFCQLRN-KRGWMPAAYLEPLDGPDESEEQDPNYEG----- 230  
Tn-p47phox NLLAGDQVEIVEKNQNGWWFCQMDK-KRGWVPASYLEPLDGPDESEEEADPDYEGS----- 230  
Tr-p47phox NLHAGDQVEIVEKNQNGWWFCQCDK-KRGWVPASYLEPLDGPDESEEEAEPDYGGSP----- 231  
O1-p47phox NLHDGDLVEILEKNSNGWWFCQCEA-KRGWVPASYLEPLDGPDESEEEAEPDYEG----- 229  
Dr-p47phox TLKMGDMVDIVEKSPNGWWFCQCES-RRGWVPASYLEPLDGADESEEEPEPNYAG----- 230  
Mm-SH3PXD2a SLQAGEVVDVIEKNESGWVVFSTSE-EQGWPATYLEAQNGTRDSDINTSKTGEVSKRR 244  
Rn-SH3PXD2a SLQAGEVVDVIEKNESGWVVFSTSE-EQGWPATYLEAQNGTRDSDINTSKTGEVSKRR 244  
Hs-SH3PXD2a SLQAGEVVDVIEKNESGWVVFSTSE-EQGWPATYLEAQNGTRDSDINTSKTGE----- 239  
Gg-SH3PXD2a SLQAGEVVDVIEKNESGWVVFSTAE-EQGWPATYLESQNGTRDSDINTSKTGE----- 271

|                 |                                                              |     |
|-----------------|--------------------------------------------------------------|-----|
| Xt-SH3PXD2a     | SLKTGELVDVIEKNESGWWFVSTTE-EQGWPATYLDSSQGGTKDDSEINTSKSGDVTKRR | 244 |
| Dr-SH3PXD2a     | SLKAGETVDVIEKSESGWWFVSTAE-EQGWPATYLDSSQSGTRDDLDLGTSRSGEVTKRR | 120 |
| Tr-SH3PXD2a1    | NLKAGETVDVIEKSESGWWFVSTAE-EQGWPATYLDSSQATRDDLDLGTFRGTGEVTKRR | 232 |
| Tr-SH3PXD2a2    | SLQAGEVVDVIEKSESGWWFVSTAE-EQGWPATYLNHSGTRDDLDLQASKAGEVTKRH   | 234 |
| Hs-SH3PXD2b     | SLSVGQVVDVIEKNESGWWFVSTAE-EQGWPATCLEGQDGVQDEFSLQPE-----      | 221 |
| Cf-SH3PXD2b     | SLSVGQVVDVIEKNESGWWFVSTAE-EQGWPATCLEGQDGMQDEFSLQPE-----      | 196 |
| Mm-SH3PXD2b     | SLSVGQVVDVIEKNESGWWFVSTAE-EQGWPATCLEGQDGVQDEFSLQPE-----      | 221 |
| Rn-SH3PXD2b     | SLSVGQVVDVIEKNESGWWFVSTAE-EQGWPATCLEGQDGVQDEFSLQPE-----      | 221 |
| Gg-SH3PXD2b     | SLCVGQLVDVIEKNESGWWFVSTSE-EQGWPATCLEAQDGVQDELSMQPD-----      | 201 |
| Dr-SH3PXD2b     | SLYVGQVVEVIEKNESGWWFVSTED-AQGWPATCLEAQD-DPDDFSLPAE-----      | 219 |
| Lg-p47phox-like | DLEAGMIVEVAEKSETGWWFVNSDD-AQGWPSTYLEPADGSTTDNVVLRAPG-----    | 246 |
| Ci-SH3PXD2      | NARVGEVVEVMDKHENGWWFVSTEDGEGQWVPGVYLKPKDGKSENLVIKQDQLG-----  | 227 |
| Ci-p47phox      | SLHSGETVEVVEKSESGWWLVCNTYGSNGWVPGAYLEKEDGSEEDLVTEKAAVG-----  | 225 |
| Sp-p47phox      | ELTAGDLVEVFEKNDNGWVFTVHD-QHGWAPGTFLQNPDGQEEDEEETLIPG-----    | 224 |
| Nv-p47phox-like | TMVAGDIVEVIDKNENGWWFVNLE-EQGWPAAAYLESVDGHSDDAAPIEGPT-----    | 220 |
| Mb-p47phox-like | SFKTGDIFEVVEKNDNGWVFSNDS-----                                | 208 |
| Hs-NOX01        | QAQAQESLDVLLRHPSGWWLVENEDRQTAWFPAPYLEE---AAPGQREGGPSLGS----  | 232 |
| Cf-NOX01        | HARAQEVIDVLLRHPSGWWLVANEEQQMAWFPAPYLEE---AAP--DREG-TTLRS---- | 228 |
| Mm-NOX01        | HTKAQEILDILLRHPSGWWLVENKQQVAVFPAPYLEE---VATCQQGESGLALQG----  | 231 |
| Rn-NOX01        | HTQAQEILDILLRHPSGWWLVENKQQTAWFPAPYLEE---IATGQQGESGMVAVQG---- | 236 |
| Gg-NOX01        | KVAKKEIVEVLLKDMTGWWLVENADKQIAWFPASYLEQ---ISAHKDIQNVESSE----- | 213 |
| Xt-NOX01        | KVKRHELVGVLIKENTGWWLVENEKHLAWFPAPYLKD---VDNSEDTSQ-TSED-----  | 205 |
| Dr-NOX01        | KVEVDETVDVLKDKQKWWLVENESKHLAWFPAPYLERAEMADDPDEMDFNESFQS----  | 232 |
| Ol-NOX01        | KVAVDEKLDVLIKDPAGWWLVESENKRLAWFPAPYLE---VLDGEDEDEGNLQ-----   | 235 |
| Tn-NOX01        | KVAADKVDVLIKDKAGWWLVENEKRMWFPAPYLEK---LEEDGDEDDTDGTR-----    | 225 |

\*\*\*

|                 |                                                              |     |
|-----------------|--------------------------------------------------------------|-----|
| Hs-p47phox      | -----EPYVAIKAYTAVEGDEVSLLEGEAVEVIHKLLDGWW                    | 264 |
| Mm-p47phox      | -----EPYVTIKAYA AVEEDEMSEGEAIEVIHKLLDGWW                     | 264 |
| Rn-p47phox      | -----EPYVTIKAYA AVEEDEVSLSEGEAIEVIHKLLDGWW                   | 264 |
| Cf-p47phox      | -----EPYVTIKAYTAEMEDEMSEGEAIEVIHKLLDGWW                      | 264 |
| Gg-p47phox      | -----ELYVVQKSYTAVEEDELTLKEGDTIEVIHKLLDGWW                    | 264 |
| Xt-p47phox      | -----DLHITTKDYSGELDDDELQEGENVEVIHKLLDGWW                     | 266 |
| Tn-p47phox      | -----ELFITIKAYKAEQEDEISLDLGESEIEVIHKLLDGWW                   | 266 |
| Tr-p47phox      | -----CELYITIKAYKAEQEDEITLDLGESEIEVIHKLLDGWW                  | 268 |
| Ol-p47phox      | -----ELHVTTNAYKAEQDDEISLDLGETVEVIHKLLDGWW                    | 265 |
| Dr-p47phox      | -----ELYKTTRGYKAVEQDEMTLEAGVIEVIHKLLDGWW                     | 266 |
| Mm-SH3PXD2a     | KAHLRRLDRRWTLGGMVNRQHSREEKYVTVQPYTSQSKDEIGFEKGVTVEVIRKNLEGWW | 304 |
| Rn-SH3PXD2a     | KAHLRRLDRRWTLGGMVNRQHSREEKYVTVQPYTSQSKDEIGFEKGVTVEVIRKNLEGWW | 304 |
| Hs-SH3PXD2a     | -----EEKYVTVQPYTSQSKDEIGFEKGVTVEVIRKNLEGWW                   | 276 |
| Gg-SH3PXD2a     | -----EEKYVTIQPYASQKDEIGFEKGVTVEVIQKNLEGWW                    | 308 |
| Xt-SH3PXD2a     | KAHLRRLDRRWTLGGIVNRQHSREEKYITVQPYTSQKDEIGFEKGDTVEVIQKNLEGWW  | 304 |
| Dr-SH3PXD2a     | KAHLKRLDRRWTLGGIVNRQHSREEKYVSVQAYASQKDEIGFEKGVTVEVIQKNLEGWW  | 180 |
| Tr-SH3PXD2a1    | KAHLKRLDRRWTLGGIVNRQHSREEKYVTLQPYTSQKDEVTFEKGVIVEVIQKNLEGWW  | 292 |
| Tr-SH3PXD2a2    | KAHLKRLDRRWTLGGVISRQHSREEKYVTVQSYTSEGKDEIAFEKGAVVEVIQKNLEGWW | 294 |
| Hs-SH3PXD2b     | -----EEEKYTVIYPYARDQDEMNLERGAVVEVIQKNLEGWW                   | 259 |
| Cf-SH3PXD2b     | -----EEEKYTVIYPYARDQDEMNLERGAVVEVIQKNLEGWW                   | 234 |
| Mm-SH3PXD2b     | -----EEEKYTVIYPYARDQDEMNLERGAVVEVQKNLEGWW                    | 259 |
| Rn-SH3PXD2b     | -----EEEKYTVIYPYARDQDEMNLERGVVVEVIQKNLEGWW                   | 259 |
| Gg-SH3PXD2b     | -----EEEKYTVIYPYARDQDEMNLKGVVVVVIQKNLEGWW                    | 239 |
| Dr-SH3PXD2b     | -----EEEKYTAIYPYARDQDEIDLERGMTVEVIQKNLEGWW                   | 257 |
| Lg-p47phox-like | -----QEEKFICIEMFQSNNGNDEISLEKGVAVEVLEKNLSGWW                 | 284 |
| Ci-SH3PXD2      | -----QGELYLTQYNGE-DSEVSFNTGVLVEVLQKNLEGWW                    | 264 |
| Ci-p47phox      | -----QGTWYVATSHYDATSNDEISFPMGAALVQLQKNLEGWW                  | 263 |

Sp-p47phox -----NDE-SYITNNAYQGQAEDEISFETGVVVTVIQKSLDGWW 262  
 Nv-p47phox-like -----VEVQYITTTSHKAELDDEITFETGVIVSVIQKDFDGGW 259  
 Mb-p47phox-like -----ASQDEKYITTAAYAASSDDEIGYEKGVVVRVLEKLDGWW 248  
 Hs-NOX01 -----SGPQFCASRAYESSRADELSVPAGARVRVLETSDRGWW 270  
 Cf-NOX01 -----SGSQFCASQAYESSHADELSVPAGARVSVLETSDRGWW 266  
 Mm-NOX01 -----SGRQFCTTQAYEGSRDELSPSGARVHVLETSDRGWW 269  
 Rn-NOX01 -----SGRQFCATQAYEGSRPDELSPSGARVHVLETSDRGWW 274  
 Gg-NOX01 -----EGSLYFVMRAYEAQKADELNLKGVVVEVRRSDNGWW 251  
 Xt-NOX01 -----EGVLYAAKAYEAMNSDEVSIIVGLVVEVIEKSNNGWW 243  
 Dr-NOX01 -----AGVFYVATKAYKATNSDELVELGSVLEVLQKSDNGWW 270  
 Ol-NOX01 -----GSLYCAVRSYSTKKNDEVPLSIGSVVEVLRKSDDGWW 272  
 Tn-NOX01 -----TLYLTAKNYKASKGDEISVAVGAVVEVLQKSDSGWW 261

\* \* \* \*\*

Hs-p47phox **VIRKDDVTGYFPPMYLQKSGQ**--DVSQAQRQIK-RGAPRRSSIRNVHSIHQSRKRKLSQ 321 -36  
 Mm-p47phox VVRKGDITGYFPPMYLQKAGE--EITQAQRQIRGRGAPRRSTIRNAQSIHQSRKRKLSQ 322 -37  
 Rn-p47phox VVRKGDITGYFPPMYLQKAGE--EITQAQRQIRSRGAPRRSTIRNAQSIHQSRKRKLSQ 322 -37  
 Cf-p47phox VVRKDDITGYFPPMYLQKSGQ--DAAQAHRQIKSRGAPRRSSIRNAHSIHQSRKRKLSQ 322 -37  
 Gg-p47phox VIRKDETTGYFPPMYLQKSGE--VNSPEKSGLRNHNIPRRSTIRNAKSIHNKGRKQISQ 322 -37  
 Xt-p47phox VVRKGSITGYFPAMYLQKSGE--TAPANENPSKRKGLPPRRSTISNANSIHKKERKQISQ 324 -37  
 Tn-p47phox VVRKGEETGYFPPMYLQKASKRAQEAARNHLQGGKPPRRSTIRNAKSIHNKSRQRLSQ 326 -39  
 Tr-p47phox VVRKGEQMGYFPPMYLQKANKREQSESSRANVQGHKPPRRSTIRNAKSIHNKSRQRLSQ 328 -39  
 Ol-p47phox VVRKDETGHFPPMYLTKASKRIQT--LRTNLHGQRPPRRSTIKNAKSIHNRSRQRLSQ 323 -37  
 Dr-p47phox VVRKGEETGYFPPMYLQKASKRAQEAARNHLQGGKPPRRSTIRNAQSIHSTVRRRISQ 326 -39  
 Mm-SH3PXD2a YIRYLGKEGWAPASYLKKAKDDLPT--RKKNLGAPVEIIGNIMEISNLLNKKASGDKEAP 362 -37  
 Rn-SH3PXD2a YIRYLGKEGWAPASYLKKAKDDLPT--RKKNLGAPVEIIGSIMEISNLLNKKASGDKEAP 362 -37  
 Hs-SH3PXD2a YIRYLGKEGWAPASYLKKAKDDLPT--RKKNLGAPVEIIGNIMEISNLLNKKASGDKETP 334 -  
 Gg-SH3PXD2a YIRYLGKEGWAPASYLKKAKDDLPS--RKKNLGAPVEIIGNIMEISNLLNKKST-DKETQ 365  
 Xt-SH3PXD2a FIKYQGKEGWAPASYLKKAKDDIPC--RKKNLGAPVEIIGNIMEISNLLNKKTPNDKESQ 362  
 Dr-SH3PXD2a YIRYQGKEGWAPASYLKKLKKDDLSP--RKKTLGAPVEIIGNIMEISNLLNKKAVSEKDIQ 238  
 Tr-SH3PXD2a1 FIRYLGKEGWAPASYLKKVKKDDFSP--RKKMTGAPVEIIGNIMEISNLLQKKSSEKDIQ 350  
 Tr-SH3PXD2a2 FIRYQDKEGWAPASYLKKMKDDLSP--RKKAVTGPVEIIGNIMEISNLLNKKALSEKDVQ 352  
 Hs-SH3PXD2b KIRYQGKEGWAPASYLKKNSGPELP--PKPGPGSPSHGALDLDGVSRRQNAVGREKELL 317  
 Cf-SH3PXD2b KIRYQGKEGWAPASYLKKNSGPELP--PKPGTGSAPHTGILDLDGLSRQSSVGRDRELL 292  
 Mm-SH3PXD2b KIRYQGKEGWAPASYLKKNSGPELP--PKLGPSSPAHSGALDLDGVSRRQNAVGREKELL 317  
 Rn-SH3PXD2b KIRYQGKEGWAPASYLKKNSGPELP--PKLGPSS-AHSGALDLDGVSRRQNAVGREKELL 316  
 Gg-SH3PXD2b KIRYQGQEGWAPASYLKKNGEMFS--QKLGSSSAHSCALDLDGISRQAVTSREK--- 294  
 Dr-SH3PXD2b KIRYQGKEGWAPASYLKK--ADILS--QKMAAGAPVHASTNDLDVACKQQNANKENK--- 311  
 Lg-p47phox-like LVRHQGKEGFAPATYLNKTEDQFAVS-LAKRKSLDVEIITNLSDISNIMKGDSPRNSLAS 343  
 Ci-SH3PXD2 FVSYNGKQGWAPASYLTKPPESVTAISLSKLLSSPVKNDSSIPSSHSTLSLSSQSSSNAG 324  
 Ci-p47phox LARYNSNEGWPVGSYLEK-----SRRTYS-WATDTAPTESVPGAESVKKSTLA- 311  
 Sp-p47phox KVSYQGKQGWAPATFLQIYKGPSGV--TPKHPTQSIGNVMLLKS GSDSKPKPGPGGSSG 320  
 Nv-p47phox-like LIRYQDKEGWAPAMYLRKPD-PS----QLHAAQAVG-----GLPSKDRVG-AVTAPA 305  
 Mb-p47phox-like QVEYQGKVGWTPGTFLKRIENSAGPTTLKSTPASSTAATNGGVPPAKPPAPQLRNEKE 308  
 Hs-NOX01 LCRYGDRAGLLPAVLLRPE----- 289  
 Cf-NOX01 LCRFRGRSGLLPVLLQPE----- 285  
 Mm-NOX01 LCRYNGRTGLLPAMSLQPE----- 288  
 Rn-NOX01 LCRYNGQTGLLPVLLQPE----- 293  
 Gg-NOX01 LIRYNGRKGYPMSMCLQAYKNPHRLQT-----IMNSGLHISTPNLCSPSPALQP--L 302  
 Xt-NOX01 LIR----- 246  
 Dr-NOX01 IVRYNRKAGYVPSMYLQPHNPRILLKS-----TQKEISRSTLDAQLQHPQT---- 318  
 Ol-NOX01 LIRFNGKVGYPAMYLPYNNPRTGLHG-----QHNKIHTSTLNLSTMKDDQVPPSI 324  
 Tn-NOX01 LIRYQGVGYVPTLCLQPYNRPQVRLNGAAPPGLQQSNKLSSSRGNLLQLPSAGRSPSP 321

|                 |                                                             |                            |
|-----------------|-------------------------------------------------------------|----------------------------|
| Mm-p47phox      | -----                                                       |                            |
| Rn-p47phox      | -----                                                       |                            |
| Cf-p47phox      | -----                                                       |                            |
| Hs-p47phox      | -----                                                       |                            |
| Gg-p47phox      | -----                                                       |                            |
| Xt-p47phox      | -----                                                       |                            |
| Tn-p47phox      | -----                                                       |                            |
| Tr-p47phox      | -----                                                       |                            |
| Ol-p47phox      | -----                                                       |                            |
| Dr-p47phox      | -----                                                       |                            |
| Mm-SH3PXD2a     | ---AEGEGSEAPITKKEISLPILCNASNG-----                          | SALAIPERTTS 399            |
| Rn-SH3PXD2a     | ---VEGEGSEAPISKKEISLPILCNASNG-----                          | SASGIPERTTS 399            |
| Hs-SH3PXD2a     | P--AEGEGHEAPIAKKEISLPILCNASNG-----                          | SAVGVPDRTVS 372            |
| Gg-SH3PXD2a     | ---AENEASETHITKKEISLPILCNDSNG-----                          | NAMMTPDKQAS 402            |
| Xt-SH3PXD2a     | ---GGNDSEEQTITKKEISLPILCNDSNG-----                          | NSMMSPEKQIP 399            |
| Dr-SH3PXD2a     | TDGEA-TTPERHISKSEISLPMPYAPEAGVAP--TVVTALGMNS----            | GSSATLQENKS 290            |
| Tr-SH3PXD2a1    | TDGEGSTTPERHTSKNEISVTPFSSEINAETGRRLSTTRDTNSPCLGIAASAALSENKA | 410                        |
| Tr-SH3PXD2a2    | TEGVP-ESPQ--AARKEISLPIPCAESS-----                           | PASNPQEEKS 387             |
| Hs-SH3PXD2b     | -----                                                       | SSQRDGRFEG 327             |
| Cf-SH3PXD2b     | -----                                                       | NNQRDGRFEG 302             |
| Mm-SH3PXD2b     | -----                                                       | NNQRDGRFEG 327             |
| Rn-SH3PXD2b     | -----                                                       | NNQRDGRFEG 326             |
| Gg-SH3PXD2b     | -----                                                       | DGRFDN 300                 |
| Dr-SH3PXD2b     | -----                                                       | NQRD 315                   |
| Lg-p47phox-like | -----                                                       | TETPKP 349                 |
| Ci-SH3PXD2      | -----                                                       |                            |
| Ci-p47phox      | -----                                                       |                            |
| Sp-p47phox      | -----                                                       | RPQP 324                   |
| Nv-p47phox-like | -----                                                       | AVRP 309                   |
| Mb-p47phox-like | -----                                                       | PPPRRESI 316               |
| Hs-NOX01        | -----                                                       |                            |
| Cf-NOX01        | -----                                                       |                            |
| Mm-NOX01        | -----                                                       |                            |
| Rn-NOX01        | -----                                                       |                            |
| Gg-NOX01        | R-----                                                      | 303                        |
| Xt-NOX01        | -----                                                       |                            |
| Dr-NOX01        | -----                                                       |                            |
| Ol-NOX01        | P-----                                                      | 325                        |
| Tn-NOX01        | Q-----                                                      | 322                        |
|                 |                                                             |                            |
| Mm-p47phox      | -----DTYRRNSVRFLQQR-----                                    | RPGRPGPQSTDG-TKDN-- 353    |
| Rn-p47phox      | -----DTYRRNSVRFLQQR-----                                    | RPARPGPQSPD--SKDN-- 352    |
| Cf-p47phox      | -----DTYRRNSV-----                                          | PTQPG----- 335             |
| Hs-p47phox      | -----DAYRRNSVRFLQQR-----                                    | RQARPGPQSPGSPLEEE-- 353    |
| Gg-p47phox      | -----ETYRRNSKKYMQNRR-----                                   | NMRGNLQNKDIISEKNE-- 354    |
| Xt-p47phox      | -----DTYRRNSKKYLKQR-----                                    | QSIVDTKSPIITEENK-- 354     |
| Tn-p47phox      | -----DAYRRNSRRYLQKGGQRDLQNKYARTAAKSPLQERKNQGN               | 367                        |
| Tr-p47phox      | -----DTYRRNSRRYLQKGGQLVKPDYPYPRNVAKSPLRERRNQGN              | 369                        |
| Ol-p47phox      | -----EAYRRNSRRYLQKGGRLASPHRSSRSGKSPLTERKNHDN                | 364                        |
| Dr-p47phox      | -----DSYRKQSRFLQQRG-----                                    | RLNSHSRIGTRSPLQERRTNKN 363 |
| Mm-SH3PXD2a     | KLAQGSPAVARIAPQRAQISSPNLRTRPPPRESSL--GFQLPKPEPPSVEVEYYTIAE  | 457                        |
| Rn-SH3PXD2a     | KLAQGSPAVARIAPQRAQISSPNLRTRPPPRESSL--GFQLPKPEPPSVEVEYYTIAE  | 457                        |

|                 |                                                               |     |                       |
|-----------------|---------------------------------------------------------------|-----|-----------------------|
| Hs-SH3PXD2a     | RLAQGSPAVARIAPQRAQISSPNLRTRPPRESSL--GFQLPKPPEPPSVEVEEYTTIAE   | 430 | (3 <sup>rd</sup> SH3) |
| Gg-SH3PXD2a     | KLAQGSPAIAIARIAPQRAQISSPNLRTRPPRESSL--GFQLPKPPEPPSVEVEEYTTIAE | 460 |                       |
| Xt-SH3PXD2a     | KVTPGSPAIVARIAPQRSEISSPNLRTRKPPRESSL--GFQLPKPPEPPSVEVEEYTTIAE | 457 |                       |
| Dr-SH3PXD2a     | RAEPGSPAIAIARVAPHRVEIGSPNLRQKPPRRDANL--AFQLPKPPEAPTVEAEYTTIAE | 348 |                       |
| Tr-SH3PXD2a1    | RGDPGSPAIVARVAPHRVEIGSPNLRQKPPRRDNL--GFHLPKPPEPPAVEAEYTTIAD   | 468 |                       |
| Tr-SH3PXD2a2    | KVEPASPAVARIAPHRVEIGSPVLRQKPPRRDNL--GFQLPSPPEPTVEAEYTTIAE     | 445 |                       |
| Hs-SH3PXD2b     | RPVPDG-----DAKQRSKMRQRPPRRDMTIPRGLNLPKPPIPPQVEEYTTIAE         | 378 | (3 <sup>rd</sup> SH3) |
| Cf-SH3PXD2b     | RPVPDG-----DIKQRSKMRQRPPRRDMTIPRGLHLPKPPVPPQVEEYTTIAE         | 353 |                       |
| Mm-SH3PXD2b     | RLVPDG-----DVKQRSKMRQRPPRRDMTIPRGLNLPKPPIPPQVEEYTTIAE         | 378 |                       |
| Rn-SH3PXD2b     | RLAPDG-----DVKQRSKMRQRPPRRDMTIPRGLNLPKPPIPPQVEEYTTIAE         | 377 |                       |
| Gg-SH3PXD2b     | RPLPNA-----DIRRKSQKMRQRPPRRDLTIPRGLNLPKPPVPPQVEEYTTIAD        | 351 |                       |
| Dr-SH3PXD2b     | RFSPFS-----DSKRKVG-ARQRPDRDLTIPRGNLPKPPVPPQVEEYTTIAD          | 365 |                       |
| Lg-p47phox-like | VTEMSY-----KVKSRLERGGNIKPPRQSMRM---VLSFTPSPHKTSHYVTIAE        | 399 |                       |
| Ci-SH3PXD2      | -----DTSSPSHKRLSGVGIKRPSLKPQVPPPPPHQSDDDVQYIAMHS              | 367 |                       |
| Ci-p47phox      | -----LVKPPPKRAT---IRRTLKVTGQDSIKEKHEDNLYITLFD                 | 350 |                       |
| Sp-p47phox      | PVQPRDEPGQLYSNYDAEVKPTPPRRATVKKSVRRG---GVRQTKPKLKK-VMEHYTTDS  | 380 |                       |
| Nv-p47phox-like | GVNPVTRDCKKTINFKAETETVTRKRKAHSVNVYG---KGEAMPALKSPDAEYFTVGE    | 366 |                       |
| Mb-p47phox-like | RRPVSIIHSGPFAEIERARQIAAQNSTGKPAKPAVPALPKRNAASTNSGNDAVTIYCTR   | 376 |                       |
| Hs-NOX01        | -----GLGALLSGTGFR---GGDDPAGEARGF-----                         | 313 |                       |
| Cf-NOX01        | -----GLGALLSGPLHREANSKEDRGGEAQR-----                          | 313 |                       |
| Mm-NOX01        | -----GLGSLLGRPGFP-----DSAGADK-----                            | 307 |                       |
| Rn-NOX01        | -----GLGSLLGRGPL-----DSGGADK-----                             | 312 |                       |
| Gg-NOX01        | -----DSTARDCTSGDGSDELESDSSLSGSGAPSGLVSWKPD-----               | 342 |                       |
| Xt-NOX01        | -----                                                         |     |                       |
| Dr-NOX01        | -----LQDS-----RLRELSRSQGNLLQPAETD---IMDKQ-----                | 347 |                       |
| Ol-NOX01        | -----RRDSPSSDSTSLREEAQGDAPRLQEDSQSSGEAASDR-----               | 364 |                       |
| Tn-NOX01        | -----QPHADGRQRSHSLNALLETLPAQPARGAAPDTGTPPSPQAPPVIR            | 369 |                       |
| Mm-p47phox      | -----PSTPRVKQPAVPPRPSSDLILHRCSTESTKRKL                        | 386 |                       |
| Rn-p47phox      | -----PSTPRAKQPAVPPRPSSDLILHRCSTESTKRKL                        | 385 |                       |
| Cf-p47phox      | -----KPQPAVPPRPSSDLILHRCSESTKRKL                              | 362 |                       |
| Hs-p47phox      | -----RQTQRSKQPAVPPRPSSDLILNRCSESTKRKL                         | 386 |                       |
| Gg-p47phox      | -----QEENKSKAQPAVPPRPSSDLIMNRCSTESTRRI                        | 387 |                       |
| Xt-p47phox      | -----EEESKSKQPAIPPRPSKELILDRCSENTKSKI                         | 387 |                       |
| Tn-p47phox      | I-----PEESGTASEGEPKKEAPVPPRPSPPELILQRCSDNTRKKI                | 408 |                       |
| Tr-p47phox      | I-----PEESSTISENEGKREAPVPPRPSPPELILQRCSDNTRKKI                | 410 |                       |
| Ol-p47phox      | I-----PELHG---SETETKRETPVPPRPSPPELILERCANTCKKV                | 403 |                       |
| Dr-p47phox      | I-----EKSSAPQAEDEK-SVPVPPRPSPQLILERCSTENTSKRM                 | 403 |                       |
| Mm-SH3PXD2a     | F-----QSCISDG-ISFRGGQKAEVIDKNSGGWWWVQIGEGEWAP                 | 497 |                       |
| Rn-SH3PXD2a     | F-----QSCISDG-ISFRGGQKAEVIDKNSGGWWWVQIGEGEWAP                 | 497 |                       |
| Hs-SH3PXD2a     | <b>F-----QSCISDG-ISFRGGQKAEVIDKNSGGWWWVQIGEGEWAP</b>          | 470 |                       |
| Gg-SH3PXD2a     | F-----QSCISDG-ISFRGGQKAEVIEKNSGGWWWVQIGEGEWAP                 | 500 |                       |
| Xt-SH3PXD2a     | F-----QSCISDG-ISFRGGQKAEVIEKNSGGWWWVQIGEGEWAP                 | 497 |                       |
| Dr-SH3PXD2a     | F-----QSSISDG-ISFRGGQKADVIEKNSGGWWWVQIGDTEGWAP                | 388 |                       |
| Tr-SH3PXD2a1    | F-----QSSISDG-ISFRGGQKADVIEKNPGWWWVQIGEGEWAP                  | 508 |                       |
| Tr-SH3PXD2a2    | F-----QSCISDG-ITFSGGQKAEVIEKNSGGWWWVQIGEGEWAP                 | 485 |                       |
| Hs-SH3PXD2b     | <b>F-----QTTIPDG-ISFQAGLKVEVIEKNLSGWWYIQIEDKEGWAP</b>         | 418 |                       |
| Cf-SH3PXD2b     | F-----QTTIPDG-ISFQAGLKVEVIEKNLSGWWYIQIEDKEGWAP                | 393 |                       |
| Mm-SH3PXD2b     | F-----QTTIPDG-ISFQAGLKVEVIEKSLSGWWYIQMEDKEGWAP                | 418 |                       |
| Rn-SH3PXD2b     | F-----QTTIPDG-ISFQAGLKVEVIEKSLSGWWYIQMEDKEGWAP                | 417 |                       |
| Gg-SH3PXD2b     | F-----QTTIPDG-ISFQAGMKVEVIEKNLSGWWYIQIEEKEGWAP                | 391 |                       |
| Dr-SH3PXD2b     | F-----QTTIPDG-ISFQAGLKVEVIEKNSGWWYIQIEDKEGWAP                 | 405 |                       |
| Lg-p47phox-like | F-----EDTVGDG-LSFKEGQSVEIVEESDGGWWWVVKLNGKSGWVP               | 439 |                       |



|                 |                                                             |     |
|-----------------|-------------------------------------------------------------|-----|
| Ci-SH3PXD2      | F-----DGKIPHG-VAFNIDDPVTVLSKSP-GWVYVEVNGNEGWP               | 406 |
| Ci-p47phox      | F-----DSSIEDG-LSFKAGQIVKVI EQSDNGWWLATLNGAEGWVP             | 390 |
| Sp-p47phox      | F-----QGAAGEGSI SFESGQKVEVLEENDGGWVYVKMNGQEGWAP             | 421 |
| Nv-p47phox-like | F-----RALGIQSGLD FSKGASVEVLDKNPNGWVYVKIDGNEGWI P            | 407 |
| Mb-p47phox-like | K-----CDKQDDSGIALPAGARVELLEKSETGWYVYVYKAGREGWAP             | 417 |
| Hs-NOX01        | -----PEPSQATAPPP----TVPTRPSGAIQSRCCVTRRAL                   | 347 |
| Cf-NOX01        | -----PEACQATTLS P----SVPARPLSAIRSRC SVTRRAL                 | 347 |
| Mm-NOX01        | -----VAEDRTIPP----VVPTRPCMSAIQSRCCSITRRAL                   | 339 |
| Rn-NOX01        | -----VTEGRTVPP----VVPTRPCMSAIQSRCCSITRRAV                   | 344 |
| Gg-NOX01        | -----LSRSLPEVEQAVP-----MRPSAHEILQRCSTVTKRAV                 | 375 |
| Xt-NOX01        | -----                                                       |     |
| Dr-NOX01        | -----KSDPCLNKMPSTP----KVPPRPAVQEILTRCTTVTRKNM               | 383 |
| O1-NOX01        | -----STNSSGFDESTGP----RVPPRPKAEELTRCTTMTRKAA                | 400 |
| Tn-NOX01        | PQYPRGQND AQLRSQHLQGSRN PQGSTQTPGPGDPHQVHHHPQECQRRSVAHPTRDT | 429 |

|                 |                                                               |     |
|-----------------|---------------------------------------------------------------|-----|
| Mm-p47phox      | TSAV-----                                                     | 390 |
| Rn-p47phox      | TSAV-----                                                     | 389 |
| Cf-p47phox      | ASSV-----                                                     | 366 |
| Hs-p47phox      | ASAV-----                                                     | 390 |
| Gg-p47phox      | -----                                                         |     |
| Xt-p47phox      | -----                                                         |     |
| Tn-p47phox      | S-----                                                        | 409 |
| Tr-p47phox      | SIHKSSASTSKPGQA-----                                          | 426 |
| O1-p47phox      | SIHRSQSGSSSQNDQ-----                                          | 419 |
| Dr-p47phox      | SMQEA-----                                                    | 408 |
| Mm-SH3PXD2a     | ASYIDKRKKPNLSRRTSTLTRPKVPPAPPSPKPEAEENPVGAC----ESQGS---PLKV   | 550 |
| Rn-SH3PXD2a     | ASYIDKRKKPNLSRRTSTLTRPKVPPAPPSPKPEAEENPVGAC----ENQGS---PLKL   | 550 |
| Hs-SH3PXD2a     | ASYIDKRKKPNLSRRTSTLTRPKVPPAPPSPKPEAEEGPTGAS----ESQDS---PRKL   | 523 |
| Gg-SH3PXD2a     | ASYIDKRKKPNLSRRTSTLTRPKVPPAPPSPKPKDSEEGTGMVSS---GDTQDS---PHKL | 556 |
| Xt-SH3PXD2a     | SSYIDKRKKPNLSRRTSTLTRPKVPPAPPVKKQDSEEDG INPLTCASTEPKDS---PSKQ | 554 |
| Dr-SH3PXD2a     | SSYIDKRKKPNLSRRTSTLTRPKVPPAPPVKKQDSEEGPSLGGSA-SKAPES---PQR-   | 443 |
| Tr-SH3PXD2a1    | SSYIDKRKKPNLSRRTSTLTRPKVPPAPPVKKQDSEEAPTS DNLP-FKASDP---PSRP  | 564 |
| Tr-SH3PXD2a2    | CSYIDKRKKPNLSRRTSTLTRPKVPPAPPVKKQDSEEAPTS DNLP-SEAPESPVYQGRP  | 544 |
| Hs-SH3PXD2b     | ATFIDKYKK-----TSNASRPNFLAPLPHEVTQLRLGAAAENNTGSEATG---PSRP     | 469 |
| Cf-SH3PXD2b     | ATFIDKYKK-----TSNASRPNFLAPLPNEVTQLHLGAAAAMENNTGSEAIG---PSRP   | 444 |
| Mm-SH3PXD2b     | ATFIDKYKK-----TSSASRPNFLAPLPHEMTQLRLGAAAATENNTGPEAVG---PSRP   | 469 |
| Rn-SH3PXD2b     | ATFIDKYKK-----TSSASRPNFLAPLPHEMTQLRLGAAAATENNTGPEAVG---PSRP   | 468 |
| Gg-SH3PXD2b     | ATFIDKYKK-----TSNASRPNFLAPLPSEMAQLRLGAAAESSAT-EEATG---PCRP    | 441 |
| Dr-SH3PXD2b     | VTFIDKYKK-----TSSASRPNFLAPLPGEMEQLKLEDTSNSTNS---EHT---WSKP    | 453 |
| Lg-p47phox-like | SAYLVERRK-----DAPVAAPPVPP-----                                | 459 |
| Ci-SH3PXD2      | ETYISKTTKP-----KPTPARPQPPSFPKTELQRASHTKVTRSSSLRQDKPA-----     | 454 |
| Ci-p47phox      | SSYLESKTT-----EAEPARNSNPGFSAKMVLPKIEETGAGRSYDPGQAKQK-----     | 437 |
| Sp-p47phox      | SNYIEKRE--VSSRINGKPSLGNLDEETGEDKVPPVLPARPAFGSGGSGAFKP-----    | 472 |
| Nv-p47phox-like | SSYLKREKSVKKATTSPKPARFQAQELRTKPKVMPDIPDTGSKPKPARPP-----       | 460 |
| Mb-p47phox-like | ADALQEENGVKATATSGAGVGTVPVKVDTRPSVAPQSSAGVGAIAAALAQRAS-----    | 471 |
| Hs-NOX01        | E-RRPRRQGRPRGCVDSVPHTTEQ-----                                 | 371 |
| Cf-NOX01        | ASKYPPRAGQ-----                                               | 357 |
| Mm-NOX01        | GQEQGTRVPR-----                                               | 349 |
| Rn-NOX01        | GQEQRTQVPP-----                                               | 354 |
| Gg-NOX01        | QQSA-----                                                     | 379 |
| Xt-NOX01        | -----                                                         |     |
| Dr-NOX01        | Q-----                                                        | 384 |
| O1-NOX01        | LATKTR-----                                                   | 406 |

Tn-NOX01

ESVKLPLARFSCSFRLLHA----- 447

|                 |                                                              |                             |       |     |
|-----------------|--------------------------------------------------------------|-----------------------------|-------|-----|
| Mm-p47phox      | -----                                                        |                             |       |     |
| Rn-p47phox      | -----                                                        |                             |       |     |
| Cf-p47phox      | -----                                                        |                             |       |     |
| Hs-p47phox      | -----                                                        |                             |       |     |
| Gg-p47phox      | -----                                                        |                             |       |     |
| Xt-p47phox      | -----                                                        |                             |       |     |
| Tn-p47phox      | -----                                                        |                             |       |     |
| Tr-p47phox      | -----                                                        |                             |       |     |
| Ol-p47phox      | -----                                                        |                             |       |     |
| Dr-p47phox      | -----                                                        |                             |       |     |
| Mm-SH3PXD2a     | KYEEPEYDVPAFG-FDSEPEMNEE-----PSGDRGSGDKHPAQPRRISPASSLQRAH    | 601                         |       |     |
| Rn-SH3PXD2a     | KYEEPEYDIPAFG-FDSEPELNEE-----PTEDRGSGDKHPAQPRRTSPASSLQRAH    | 601                         |       |     |
| Hs-SH3PXD2a     | KYEEPEYDIPAFG-FDSEPELSEE-----PVEDRASGERRPAQPHRSPASSLQRAR     | 574                         |       |     |
| Gg-SH3PXD2a     | KYEEPEYDVPTFG-FDSECEVNES-----HREE-GTPEKRLFQPLKPSPVSSLQKAK    | 606                         |       |     |
| Xt-SH3PXD2a     | IYEEPEYDVPAFG-FDLEVELNVTN-----QSHGEELIQENLFQPSRSPVSSLQRPK    | 606                         |       |     |
| Dr-SH3PXD2a     | VYEEPEYDVPAFG-FDSELDNPPKPKTHNSPKPEP-RKFEIKSNPAAAERIAQAGKASP  | 501                         |       |     |
| Tr-SH3PXD2a1    | VYEEPEYDVPTFG-CEREPTDNPVKNERNPDVKTTSQVSDKYHSSPAFTKAAPPVCKAPS | 623                         |       |     |
| Tr-SH3PXD2a2    | VYEEPEYDVPAIGDLLESEFEFLRGESSLVDGKNEDTSSEKGSMSKPSPASSLHSAS    | 604                         |       |     |
| Hs-SH3PXD2b     | LPDAPHGVMSGLPWSKDWKGSKD-----VLRKASSDMSASAGYEEISDPDMEEKP      | 520                         |       |     |
| Cf-SH3PXD2b     | LPDAPHGAMDSGMPWSKDWKGGKE-----VPRKASSDMSAGYEEISSPDLEEKP       | 495                         |       |     |
| Mm-SH3PXD2b     | LPEAPHGAVDSGMLWSKDWKGGKE-----APRKASSDLSASTGYEEISDPTQEEKP     | 520                         |       |     |
| Rn-SH3PXD2b     | LPEAPHGAVDSGMLWSKDWKGGKE-----APRKASSDLSASTGYEEISDPTQEEKP     | 519                         |       |     |
| Gg-SH3PXD2b     | LPEAPPNGMDCGMKRAKDWKG-KE-----AT--ESGDLAFTCGYEEISDRDVEEKP     | 489                         |       |     |
| Dr-SH3PXD2b     | LPDEPSS--NSDLSTRSKLREWKP-----NAAKSSSHFSGPLP-PPSSPTAEKPK      | 501                         |       |     |
| Lg-p47phox-like | -----                                                        | HAASKRASRVIIYKTC            | 475   |     |
| Ci-SH3PXD2      | -----                                                        | VMDRVEHTYSNDTNFRNFKPKPTLPKK | 481   |     |
| Ci-p47phox      | -----                                                        | LIG-----                    | SPLKL | 445 |
| Sp-p47phox      | -----                                                        | VAKKSTPPPVDRSNSPSFTNRK      | 494   |     |
| Nv-p47phox-like | -----                                                        | VSKKITIIPNNELSN-SFQN--      | 479   |     |
| Mb-p47phox-like | -----                                                        | TMATGTASKPLKPTKPTATPGKATPSK | 498   |     |
| Hs-NOX01        | -----                                                        |                             |       |     |
| Cf-NOX01        | -----                                                        |                             |       |     |
| Mm-NOX01        | -----                                                        |                             |       |     |
| Rn-NOX01        | -----                                                        |                             |       |     |
| Gg-NOX01        | -----                                                        |                             |       |     |
| Xt-NOX01        | -----                                                        |                             |       |     |
| Dr-NOX01        | -----                                                        |                             |       |     |
| Ol-NOX01        | -----                                                        |                             |       |     |
| Tn-NOX01        | -----                                                        |                             |       |     |

|            |       |  |
|------------|-------|--|
| Mm-p47phox | ----- |  |
| Rn-p47phox | ----- |  |
| Cf-p47phox | ----- |  |
| Hs-p47phox | ----- |  |
| Gg-p47phox | ----- |  |
| Xt-p47phox | ----- |  |
| Tn-p47phox | ----- |  |
| Tr-p47phox | ----- |  |
| Ol-p47phox | ----- |  |
| Dr-p47phox | ----- |  |

|                 |                                                              |     |
|-----------------|--------------------------------------------------------------|-----|
| Mm-SH3PXD2a     | FKVGE-----SSEDVALEEETIYENEGFRPYTEDTSLARGSSGSDSPGSSSLSLAVK    | 654 |
| Rn-SH3PXD2a     | FKVGE-----SSEDVALEEETIYENEGFRPYTEDTSLARGSSGSDSPGNSSSLAMK     | 654 |
| Hs-SH3PXD2a     | FKVGE-----SSEDVALEEETIYENEGFRPYAEDTSLARGSSGSDSPGSSSLSLTRK    | 627 |
| Gg-SH3PXD2a     | FKVGE-----SSEDVANEETIYENEGFRRYVEDALS NKESSGSDSQKSSSLIRR      | 659 |
| Xt-SH3PXD2a     | FRVGE-----FSEDVTNEETIYENEGFRPLVEEALSSKESSGSDSQKSS--VTIQR     | 657 |
| Dr-SH3PXD2a     | LLKVMTSPLRKRNSLENINKEEVIYENEGFR---FSSDDFASGCDS-HTPR---SLTLGR | 554 |
| Tr-SH3PXD2a1    | GVTHQRASFR---SVEEVSKAECIYENQFRRGAGSERNLVKGCEPNSPKSYHSSTVPR   | 680 |
| Tr-SH3PXD2a2    | FKMGESFEDGHDAGGEAEGDEECIYENDGFR---PFKETPERQCSDSSSSRTSVFSESS  | 661 |
| Hs-SH3PXD2b     | SLPPR-----KESI IKSEGELLERERERQRTEQLRGPTPKPPGVILPMMPAKHIPPA   | 572 |
| Cf-SH3PXD2b     | SLPPR-----KESI IKSEGELQERER--QRMEQLRGSSPKPPGMILPMIPAKHTPPA   | 545 |
| Mm-SH3PXD2b     | SLPPR-----KESI IKSEEELLERER--QKMEPLRGSSPKPPGMILPMIPAKHAPLA   | 570 |
| Rn-SH3PXD2b     | SLPPR-----KESI IKSEEELLERER--QKMEPHRGSSPKPPGVILPMIPAKHAPLA   | 569 |
| Gg-SH3PXD2b     | SLPPR-----KESI IKSEGELLERQR-----PPPKPPGMILMIPPKQSAAP         | 531 |
| Dr-SH3PXD2b     | ALPPR-----RESINKS-LELEDKPK--AELSKPLPKPPVPGVIAPLVTPKAAPLK     | 550 |
| Lg-p47phox-like | LFMAE-----NEGELGFDEGET-----                                  | 492 |
| Ci-SH3PXD2      | PLKPA-----VNNQKPTFNAGNGQTPLPN-----                           | 505 |
| Ci-p47phox      | KLEGK-----ERNTPFQLQAK-----                                   | 461 |
| Sp-p47phox      | AVTNN-----GRGGGDVRRGSG-----                                  | 512 |
| Nv-p47phox-like | -----DLKSALRSAG-----                                         | 489 |
| Mb-p47phox-like | LATPAR-----SSGPKSDGATPPTLPLRPTMSGGTPAKPVKPAKSTPDASSKPAP      | 550 |
| Hs-NOX01        | -----                                                        |     |
| Cf-NOX01        | -----                                                        |     |
| Mm-NOX01        | -----                                                        |     |
| Rn-NOX01        | -----                                                        |     |
| Gg-NOX01        | -----                                                        |     |
| Xt-NOX01        | -----                                                        |     |
| Dr-NOX01        | -----                                                        |     |
| Ol-NOX01        | -----                                                        |     |
| Tn-NOX01        | -----                                                        |     |
| Mm-p47phox      | -----                                                        |     |
| Rn-p47phox      | -----                                                        |     |
| Cf-p47phox      | -----                                                        |     |
| Hs-p47phox      | -----                                                        |     |
| Gg-p47phox      | -----                                                        |     |
| Xt-p47phox      | -----                                                        |     |
| Tn-p47phox      | -----                                                        |     |
| Tr-p47phox      | -----                                                        |     |
| Ol-p47phox      | -----                                                        |     |
| Dr-p47phox      | -----                                                        |     |
| Mm-SH3PXD2a     | NSPKSDSPKSSSLKLAEKNAQAELGKNQSNISFSSSVTISTTC--SSSSSSSSLSKNN   | 712 |
| Rn-SH3PXD2a     | NSPKSDSPKSSSLKLAEKNAQAELGKNQSNISFSSSVTIGTTS--SSSSSSSSLSKNS   | 712 |
| Hs-SH3PXD2a     | NSPKSGSPKSSSLKLAEKNAQAEMGKNHSSASFSSSITINTCCSSSSSSSSLSKTS     | 687 |
| Gg-SH3PXD2a     | NSPCSI SPKSS-FMKPKMEKDIQPDVGKCHYSR-----S                     | 692 |
| Xt-SH3PXD2a     | NSPTAVSSKPP-LLKYKSERNVQKETKNVSFST-----S                      | 690 |
| Dr-SH3PXD2a     | KPFGSSSGGKPLRKVSPDLN-RSHSLG-----RA                           | 583 |
| Tr-SH3PXD2a1    | RPSGTSPLAGRP IKTMTPETNRRSQTLGRRADLSC-----RS                  | 717 |
| Tr-SH3PXD2a2    | KTAGGGWRAGG--SKFKGDSNGSSFSNK-----FE                          | 689 |
| Hs-SH3PXD2b     | RDSRRPEPKPKDKSRLFQLKNEMGLECG-----                            | 599 |
| Cf-SH3PXD2b     | RDGRRSEPKPKDKGKLLQLKNEMGLECG-----                            | 572 |
| Mm-SH3PXD2b     | RDSRKPEPKLDKSK-FPLRNDMGLECG-----                             | 596 |
| Rn-SH3PXD2b     | RDSKKPEPKPKDKSK-FPLRNDMGLECG-----                            | 595 |
| Gg-SH3PXD2b     | KDSKKPEPKPEKGLFQLKNEMGLECG-----                              | 558 |

|                 |                                                              |     |
|-----------------|--------------------------------------------------------------|-----|
| Dr-SH3PXD2b     | PDKPPEMKKDDKNKQ-----                                         | 565 |
| Lg-p47phox-like | -----                                                        |     |
| Ci-SH3PXD2      | -----                                                        |     |
| Ci-p47phox      | -----                                                        |     |
| Sp-p47phox      | -----                                                        |     |
| Nv-p47phox-like | -----                                                        |     |
| Mb-p47phox-like | VKPAKSTPDTPSKPARPTMSG-----                                   | 572 |
| Hs-NOX01        | -----                                                        |     |
| Cf-NOX01        | -----                                                        |     |
| Mm-NOX01        | -----                                                        |     |
| Rn-NOX01        | -----                                                        |     |
| Gg-NOX01        | -----                                                        |     |
| Xt-NOX01        | -----                                                        |     |
| Dr-NOX01        | -----                                                        |     |
| Ol-NOX01        | -----                                                        |     |
| Tn-NOX01        | -----                                                        |     |
| Mm-p47phox      | -----                                                        |     |
| Rn-p47phox      | -----                                                        |     |
| Cf-p47phox      | -----                                                        |     |
| Hs-p47phox      | -----                                                        |     |
| Gg-p47phox      | -----                                                        |     |
| Xt-p47phox      | -----                                                        |     |
| Tn-p47phox      | -----                                                        |     |
| Tr-p47phox      | -----                                                        |     |
| Ol-p47phox      | -----                                                        |     |
| Dr-p47phox      | -----                                                        |     |
| Mm-SH3PXD2a     | GDLKPRSASDAGIRDTPKV----GTKKDPDVKAGLASCARAKPSVRPKPVLN--RAESQ  | 765 |
| Rn-SH3PXD2a     | GDLKPRSASDAGIRDSPKG----GTKKDPDVKTGLASCVRAPKPSVRPKPVLN--RAESQ | 765 |
| Hs-SH3PXD2a     | GDLKPRSASDAGIRGTPKV----RAKKDADANAGLTSCPRAPKPSVRPKPFLN--RAESQ | 740 |
| Gg-SH3PXD2a     | EETKPRSASDVGLRSMPT----GMKKEP---GQSPSIRAKPIVRPKPFLN--KADSQ    | 741 |
| Xt-SH3PXD2a     | EEIKPRSASDVGLRAVPKV----STKKDAEQKQAVVPSTRAKPTVRPKPFLS--KADSQ  | 743 |
| Dr-SH3PXD2a     | ERHSSKLFSDSARNPKREP----VMRKDVEIRIGQSPLARPKPVVRPKPLLT--KSEPQ  | 637 |
| Tr-SH3PXD2a1    | HDSSPHSSSDELSRAPKK-----TFSQGVEQRLGQSPSTRPKPSVRPKPLLA--KSEAQ  | 769 |
| Tr-SH3PXD2a2    | EGTGPKSALAESQN--KREQ---EESKPVSTLSSS--KLKPVVRPKPQLA--KTS--    | 736 |
| Hs-SH3PXD2b     | HKVLAKEVKKPNLRPISK--SKTDLPEEKPDATPQNPFLKSRPQVRPKPAPSPKTEPPQ  | 656 |
| Cf-SH3PXD2b     | HKVLAKEVKKPNLRPISK--SKADLPEEKPEGIPQNPFLKSKPQVRPKPAPSPRTEPPQ  | 629 |
| Mm-SH3PXD2b     | HKVLAKEVKKPNLRPISR--SKAELSEEKVDPTSQNLFMKSRPQVRPKPTPSPKTEPAQ  | 653 |
| Rn-SH3PXD2b     | HKVLAKEVKKPNLRPISR--SKAELPEEKVEPNPQNLFLKSRPQVRPKPTPSPKTEPAQ  | 652 |
| Gg-SH3PXD2b     | HKVSAKEVKKPNLRP IVKPTKPAEPVEDKPEPITQNPFLKSRPQIKPKPAAAARTDPPP | 618 |
| Dr-SH3PXD2b     | -----                                                        |     |
| Lg-p47phox-like | -----                                                        |     |
| Ci-SH3PXD2      | -----                                                        |     |
| Ci-p47phox      | -----                                                        |     |
| Sp-p47phox      | -----                                                        |     |
| Nv-p47phox-like | -----                                                        |     |
| Mb-p47phox-like | -----VKPKPSLPGRPEPAANKVPAKPA                                 | 595 |
| Hs-NOX01        | -----                                                        |     |
| Cf-NOX01        | -----                                                        |     |
| Mm-NOX01        | -----                                                        |     |
| Rn-NOX01        | -----                                                        |     |
| Gg-NOX01        | -----                                                        |     |
| Xt-NOX01        | -----                                                        |     |

|                 |                                                              |     |
|-----------------|--------------------------------------------------------------|-----|
| Dr-NOX01        | -----                                                        |     |
| Ol-NOX01        | -----                                                        |     |
| Tn-NOX01        | -----                                                        |     |
| Mm-p47phox      | -----                                                        |     |
| Rn-p47phox      | -----                                                        |     |
| Cf-p47phox      | -----                                                        |     |
| Hs-p47phox      | -----                                                        |     |
| Gg-p47phox      | -----                                                        |     |
| Xt-p47phox      | -----                                                        |     |
| Tn-p47phox      | -----                                                        |     |
| Tr-p47phox      | -----                                                        |     |
| Ol-p47phox      | -----                                                        |     |
| Dr-p47phox      | -----                                                        |     |
| Mm-SH3PXD2a     | SQEKMDISSLRQLRPTGQLRGG-LKGSRSEDESELPPQMASE---GSRRGSADIIPLTA  | 820 |
| Rn-SH3PXD2a     | SQEKMDISSLRQLRPTGQLRGG-LKGSRSEDESELPPQTASE---GSRRGSADIIPLPA  | 820 |
| Hs-SH3PXD2a     | SQEKMDISTLRRQLRPTGQLRGG-LKGSKSEDESELPPQTASEAPSEGSRRSSDLITLPA | 799 |
| Gg-SH3PXD2a     | SQEKMDISTLRRQLRPTGQLRGG-LKGSRSESESESPHTASENHDDHVRRGSADLITAPS | 800 |
| Xt-SH3PXD2a     | NQDKMDISSLRQLRPTGQLRSG-LKGSKSESEENPPKTALENADSKPRRRSVDLTSNTS  | 802 |
| Dr-SH3PXD2a     | SPERMDISSIRRHLRPTGSLRQGAIRAMRGEDSETASVVSSE--DSTSSRSTSDLSSVYS | 695 |
| Tr-SH3PXD2a1    | SPERMDMSSLRQLRPTSQFQHG-LKPSRGEDSETASVISSE--DSMCSRSTSDLSSVYS  | 826 |
| Tr-SH3PXD2a2    | SSEQMDISSLRQLRPTGQLKNS--IKMKNEDESETASVISSE--DSFSSQSTDLSSIYS  | 792 |
| Hs-SH3PXD2b     | GEDQVDICNLRSKLRPAKSQDKSLLDGEGPQAVGGQDVAFSR-----              | 698 |
| Cf-SH3PXD2b     | GEDQVDICNLRSKLRPAKSQEKPLLDGEGS----QDVACSR-----               | 666 |
| Mm-SH3PXD2b     | SEDHVDIYNLRSKLRPAKSQEKALLDGESHHAAGSHDTALSR-----              | 695 |
| Rn-SH3PXD2b     | GEDQVDIYNLRSKLRPAKSQEKALLDGESHHAAGGHDTALGR-----              | 694 |
| Gg-SH3PXD2b     | ADDKLDICSLRSKLRPAKQPEKPEQDTAAS----ESSCST-----                | 655 |
| Dr-SH3PXD2b     | -----                                                        |     |
| Lg-p47phox-like | -----                                                        |     |
| Ci-SH3PXD2      | -----                                                        |     |
| Ci-p47phox      | -----                                                        |     |
| Sp-p47phox      | -----                                                        |     |
| Nv-p47phox-like | -----                                                        |     |
| Mb-p47phox-like | RPGRPDPASSVGVAVAASPASNAKKARAKSDFEGQPGESISLK-----             | 638 |
| Hs-NOX01        | -----                                                        |     |
| Cf-NOX01        | -----                                                        |     |
| Mm-NOX01        | -----                                                        |     |
| Rn-NOX01        | -----                                                        |     |
| Gg-NOX01        | -----                                                        |     |
| Xt-NOX01        | -----                                                        |     |
| Dr-NOX01        | -----                                                        |     |
| Ol-NOX01        | -----                                                        |     |
| Tn-NOX01        | -----                                                        |     |
| Mm-p47phox      | -----                                                        |     |
| Rn-p47phox      | -----                                                        |     |
| Cf-p47phox      | -----                                                        |     |
| Hs-p47phox      | -----                                                        |     |
| Gg-p47phox      | -----                                                        |     |
| Xt-p47phox      | -----                                                        |     |
| Tn-p47phox      | -----                                                        |     |
| Tr-p47phox      | -----                                                        |     |

|                 |                                                                |                           |
|-----------------|----------------------------------------------------------------|---------------------------|
| Ol-p47phox      | -----                                                          |                           |
| Dr-p47phox      | -----                                                          |                           |
| Mm-SH3PXD2a     | T---TPPCVPKKEWEG-QGATYVTC SAYQKVQDSEISFPAGA EVHVLEKAVSGWWYVRFG | 876                       |
| Rn-SH3PXD2a     | T---TPPCVPKKEWEG-QGTAYVTC SAYQKVQDSEISFPAGA EVHVLEKAVSGWWYVRFG | 876                       |
| Hs-SH3PXD2a     | T---TPPCPTKKEWEG-PATSYMTCSAYQKVQDSEISFPAGVEVQVLEKQESGWWYVRFG   | 855 (4 <sup>th</sup> SH3) |
| Gg-SH3PXD2a     | RGIFCSSHPAKTEQENDTRCFYVTTDSYQKVQDSEICFPAGVEVEVLEKQASGWWYLYKG   | 860                       |
| Xt-SH3PXD2a     | Q---TSSNNDKSEESA EQKSFYATSTYQKVLDSEISFPVGA KIEVLDKQDSGWWYIKYK  | 859                       |
| Dr-SH3PXD2a     | K-----GSRGGESDHESVLFRTT DAYERAQESEL SFPAGVEVEVLEKQESGWWFVRWG   | 748                       |
| Tr-SH3PXD2a1    | K-----GSRCDSDVEGPNLYRSLD DAYKKVQDSEV SFPAGVEVEVLEKEQSGWWYIRWG  | 879                       |
| Tr-SH3PXD2a2    | K-----GSRGDSLEGCAVYRTTDPYEKVQESEL SFPAGVEVEVLEKQESGWWYVVRWG    | 845                       |
| Hs-SH3PXD2b     | -----SFLPGEGPGR AQDRTG                                         | 714                       |
| Cf-SH3PXD2b     | -----SFLPGEGPGR TQDRTG                                         | 682                       |
| Mm-SH3PXD2b     | -----SFLPGEGPGHGQDRSG                                          | 711                       |
| Rn-SH3PXD2b     | -----SFLPGEGPGRGQDRSG                                          | 710                       |
| Gg-SH3PXD2b     | -----PAVAPEASGRFQERPS                                          | 671                       |
| Dr-SH3PXD2b     | -----                                                          |                           |
| Lg-p47phox-like | -----VDVMDKTD AEWWLVIRIG                                       | 509                       |
| Ci-SH3PXD2      | -----                                                          |                           |
| Ci-p47phox      | -----                                                          |                           |
| Sp-p47phox      | -----GVGAGGNMMAALKKQLEKSS                                      | 532                       |
| Nv-p47phox-like | -----PSAHGVEEVYVAKSDYEDKS                                      | 509                       |
| Mb-p47phox-like | -----AGEIVTVEEEAATGWWFVIKA                                     | 659                       |
| Hs-NOX01        | -----                                                          |                           |
| Cf-NOX01        | -----                                                          |                           |
| Mm-NOX01        | -----                                                          |                           |
| Rn-NOX01        | -----                                                          |                           |
| Gg-NOX01        | -----                                                          |                           |
| Xt-NOX01        | -----                                                          |                           |
| Dr-NOX01        | -----                                                          |                           |
| Ol-NOX01        | -----                                                          |                           |
| Tn-NOX01        | -----                                                          |                           |
| Mm-p47phox      | -----                                                          |                           |
| Rn-p47phox      | -----                                                          |                           |
| Cf-p47phox      | -----                                                          |                           |
| Hs-p47phox      | -----                                                          |                           |
| Gg-p47phox      | -----                                                          |                           |
| Xt-p47phox      | -----                                                          |                           |
| Tn-p47phox      | -----                                                          |                           |
| Tr-p47phox      | -----                                                          |                           |
| Ol-p47phox      | -----                                                          |                           |
| Dr-p47phox      | -----                                                          |                           |
| Mm-SH3PXD2a     | E-LEGWAPSHYLVAEENQQPDTASKEGDTG--KSSQNEGKSDSLEKIEKR VQALNTVNQS  | 933                       |
| Rn-SH3PXD2a     | E-LEGWAPSHYLVPEENQQPDPDSKEPDTV--KSTQNEGKSDSLEKIEKR VQALNTVNQS  | 933                       |
| Hs-SH3PXD2a     | E-LEGWAPSHYLVLDENEQPDPSGKELDTVPAKGRQNEGKSDSLEKIEKR VQALNTVNQS  | 914                       |
| Gg-SH3PXD2a     | D-MEGWAPSHYLALPDNQQ-ETTSVETDASFARNRKNENKSN SLEKIEKR VQALNTINQS | 918                       |
| Xt-SH3PXD2a     | D-SEGWAPSHFLEEVDNKKADTSIAESEST--KIKKNENKSN SLEKIEKR VQALNTINQS | 916                       |
| Dr-SH3PXD2a     | S-DEGWVPTFYLEPIKHTH-NVGIQESRDSPLVDLGSTNKSNSLEKNEQR VQALNNLNQQ  | 806                       |
| Tr-SH3PXD2a1    | S-EEGWAPSYYLESVRQVG-DAGS-----GGGKSDSLEKNEQ NVLTLNNINI Q        | 925                       |
| Tr-SH3PXD2a2    | D-TEGWAPTYYLEPLRQQD-DFAGSESEGSP-SKPGSLSKSN SLEKNEQR VQALNNINQN | 902                       |
| Hs-SH3PXD2b     | K-QDGLSPKEISCRAPPRP-----AKTTDPVSKSVPVPLQEAP-QQRPVVPPR          | 760                       |
| Cf-SH3PXD2b     | K-QDGLSPKEVPCRAPPKP-----VKTADVPKVNPTPLQEAS-PQRPVVLP R          | 728                       |
| Mm-SH3PXD2b     | R-QDGLSPKETPCRAPPRP-----AKTTDPGPKNVPVPVQEATLQQRPVVPPR          | 758                       |

|                 |                                                               |     |
|-----------------|---------------------------------------------------------------|-----|
| Rn-SH3PXD2b     | R-QDGLSPKETPCRAPPRP-----AKTTDPGPKNVVPVQEAT-QQRPVVPPR          | 756 |
| Gg-SH3PXD2b     | V-ENKALPK-----SPPGP-----AVAP-----AAREPT-PQRPVVPPR             | 703 |
| Dr-SH3PXD2b     | -----                                                         |     |
| Lg-p47phox-like | N-EEGWAPRSYIEQVEIED-----TRG-----                              | 530 |
| Ci-SH3PXD2      | -----                                                         |     |
| Ci-p47phox      | -----                                                         |     |
| Sp-p47phox      | V-GESSSPAIPARPGVAPK-----                                      | 550 |
| Nv-p47phox-like | D-GENWAPAN-FLEMKSPE-----                                      | 526 |
| Mb-p47phox-like | DKSEGWAPADYLDLTGSNS-----                                      | 678 |
| Hs-NOX01        | -----                                                         |     |
| Cf-NOX01        | -----                                                         |     |
| Mm-NOX01        | -----                                                         |     |
| Rn-NOX01        | -----                                                         |     |
| Gg-NOX01        | -----                                                         |     |
| Xt-NOX01        | -----                                                         |     |
| Dr-NOX01        | -----                                                         |     |
| Ol-NOX01        | -----                                                         |     |
| Tn-NOX01        | -----                                                         |     |
| Mm-p47phox      | -----                                                         |     |
| Rn-p47phox      | -----                                                         |     |
| Cf-p47phox      | -----                                                         |     |
| Hs-p47phox      | -----                                                         |     |
| Gg-p47phox      | -----                                                         |     |
| Xt-p47phox      | -----                                                         |     |
| Tn-p47phox      | -----                                                         |     |
| Tr-p47phox      | -----                                                         |     |
| Ol-p47phox      | -----                                                         |     |
| Dr-p47phox      | -----                                                         |     |
| Mm-SH3PXD2a     | -----KRATPPIPSKPPGGFGKTSGT---VAVKMRNGVRQVAVRPQSVFVSPP---      | 978 |
| Rn-SH3PXD2a     | -----KRATPPIPSKPPGGFGKTSGT---VAVKMRNGVRQVAVRPQSVFVSPP---      | 978 |
| Hs-SH3PXD2a     | -----KKATPPIPSKPPGGFGKTSGT---PAVKMRNGVRQVAVRPQSVFVSPP---      | 959 |
| Gg-SH3PXD2a     | -----KRATPPIPSKPPGGFSKTSG----PVKMRNGVRQLAVRPQSVFVSPP---       | 961 |
| Xt-SH3PXD2a     | -----KRATPPVPSRPPGGFSKPPGPG-SNVVKLNRNGVKQVTVRPQSVFVSAP---     | 963 |
| Dr-SH3PXD2a     | ----NLRSMNSPSPPIPSKPPGGFSKPTAMLNSSVRMRNGVRQAAVRPQSVFVSPPQPL   | 862 |
| Tr-SH3PXD2a1    | GRNQQRHRLKRNTPPIPSKPPGGFSKPSGMVNGG-VRMNRNGVRQVAVRPQSVFVTTTQSA | 984 |
| Tr-SH3PXD2a2    | -----LKKVTPPIPSKPPGGLSKPISFFGSR---KQNSAKQVVRPQSVLISAP---I     | 949 |
| Hs-SH3PXD2b     | -----RPPPPKKTSSSS---RPLPEVRGPQCEGHESRAAPTGRALLVPP---          | 802 |
| Cf-SH3PXD2b     | -----RPPPPKKTSSSS---RPLPEVRGPQREASEGKAAPAGRALLVPP---          | 769 |
| Mm-SH3PXD2b     | -----RPPPPKKTSSSPLSCRPLPEVRGAQRE--ESRVAPAAGRALLVPP---         | 801 |
| Rn-SH3PXD2b     | -----RPPPPKKTSSSPLSCRPLPEVRGSQRE--ESRAIPASGRALLVPP---         | 799 |
| Gg-SH3PXD2b     | -----RPPPPKKTTSVPAG--PVPEAR-----ASPLGRPMLVPP---               | 736 |
| Dr-SH3PXD2b     | -----                                                         |     |
| Lg-p47phox-like | -----KPPAPPK-----GKPSIQFPLPAR---                              | 549 |
| Ci-SH3PXD2      | -----                                                         |     |
| Ci-p47phox      | -----                                                         |     |
| Sp-p47phox      | -----                                                         |     |
| Nv-p47phox-like | -----                                                         |     |
| Mb-p47phox-like | -----DSQPGAPAKPAKPSKPSK-----                                  | 696 |
| Hs-NOX01        | -----                                                         |     |
| Cf-NOX01        | -----                                                         |     |
| Mm-NOX01        | -----                                                         |     |
| Rn-NOX01        | -----                                                         |     |

|                 |                                                             |      |
|-----------------|-------------------------------------------------------------|------|
| Gg-NOX01        | -----                                                       |      |
| Xt-NOX01        | -----                                                       |      |
| Dr-NOX01        | -----                                                       |      |
| Ol-NOX01        | -----                                                       |      |
| Tn-NOX01        | -----                                                       |      |
| Mm-p47phox      | -----                                                       |      |
| Rn-p47phox      | -----                                                       |      |
| Cf-p47phox      | -----                                                       |      |
| Hs-p47phox      | -----                                                       |      |
| Gg-p47phox      | -----                                                       |      |
| Xt-p47phox      | -----                                                       |      |
| Tn-p47phox      | -----                                                       |      |
| Tr-p47phox      | -----                                                       |      |
| Ol-p47phox      | -----                                                       |      |
| Dr-p47phox      | -----                                                       |      |
| Mm-SH3PXD2a     | PKDNNLSCALRRNESLTATDSLRLG-----VRRNSSFSTARSAAAEEKGRLA-----   | 1024 |
| Rn-SH3PXD2a     | PKDNNLSCALRRNESLTATDSVRG-----VRRNSSFSTARSAAAEEKGRLA-----    | 1024 |
| Hs-SH3PXD2a     | PKDNNLSCALRRNESLTATDGLRG-----VRRNSSFSTARSAAAEEKGRLA-----    | 1005 |
| Gg-SH3PXD2a     | PKDNNLSCSLRRNESLTATDHLRN-----VRRNSSFSNARSQPGDVKGKQP-----    | 1007 |
| Xt-SH3PXD2a     | PKDNNISCNLRRNESLSATDHLRG-----VRRNSSFNTVRSQPNQTKISSS-----    | 1009 |
| Dr-SH3PXD2a     | KETNIHTGSLRRNESLGAGDHLRS---TGGVRRNSSFTAVRPQPVTDVVRV-----    | 910  |
| Tr-SH3PXD2a1    | KDSHYMTGSLRRNDSLSRSDHYGSGSATLGVRRNASFSTVRPHVVESHTRPVERSGVGS | 1044 |
| Tr-SH3PXD2a2    | MDPPSSLGALRRNESLNSTDHPRV---SPTVRRNASFGTAPRGLVANNLALP-----   | 998  |
| Hs-SH3PXD2b     | KAKPFLSNLGGQDDTRGKGLGP-----                                 | 826  |
| Cf-SH3PXD2b     | KAKPFLSNSSGGHDDMRGKGLGP-----                                | 793  |
| Mm-SH3PXD2b     | KAKPFLSNSSVGQDDMRGKGLGP-----                                | 825  |
| Rn-SH3PXD2b     | KAKPFLSNSSVGQDDIRGKGLGP-----                                | 823  |
| Gg-SH3PXD2b     | KARPFLS--AAIQDEAKVKSSVGP-----                               | 758  |
| Dr-SH3PXD2b     | -----                                                       |      |
| Lg-p47phox-like | -----                                                       |      |
| Ci-SH3PXD2      | -----                                                       |      |
| Ci-p47phox      | -----                                                       |      |
| Sp-p47phox      | -----                                                       |      |
| Nv-p47phox-like | -----                                                       |      |
| Mb-p47phox-like | -----                                                       |      |
| Hs-NOX01        | -----                                                       |      |
| Cf-NOX01        | -----                                                       |      |
| Mm-NOX01        | -----                                                       |      |
| Rn-NOX01        | -----                                                       |      |
| Gg-NOX01        | -----                                                       |      |
| Xt-NOX01        | -----                                                       |      |
| Dr-NOX01        | -----                                                       |      |
| Ol-NOX01        | -----                                                       |      |
| Tn-NOX01        | -----                                                       |      |
| Mm-p47phox      | -----                                                       |      |
| Rn-p47phox      | -----                                                       |      |
| Cf-p47phox      | -----                                                       |      |
| Hs-p47phox      | -----                                                       |      |
| Gg-p47phox      | -----                                                       |      |
| Xt-p47phox      | -----                                                       |      |



|                 |                                                               |                            |
|-----------------|---------------------------------------------------------------|----------------------------|
| Tn-p47phox      | -----                                                         |                            |
| Tr-p47phox      | -----                                                         |                            |
| Ol-p47phox      | -----                                                         |                            |
| Dr-p47phox      | -----                                                         |                            |
| Mm-SH3PXD2a     | -ERAASQGSESP--LLPTQRKGIPVSPVRPKPIEKSQFIHNNL-KDVYISIADYEGDE-E  | 1079                       |
| Rn-SH3PXD2a     | -ERAASQGSESP--LLPTQRNGIPVSPVRPKPIEKSQFIHNNL-KDVYVSIADYEGDE-E  | 1079                       |
| Hs-SH3PXD2a     | -ERAASQGS DSP--LLPAQRNSIPVSPVRPKPIEKSQFIHNNL-KDVYVSIADYEGDE-E | 1060 (5 <sup>th</sup> SH3) |
| Gg-SH3PXD2a     | -ERSGSEGSETTS-NLPTQRNGIPVSTVRPKPIEKSQFIHNNL-KDIYVSIADYEGDE-E  | 1063                       |
| Xt-SH3PXD2a     | -AKPDGDMSESETSIRPSQKNGIPVSTVRPKPIEKSQFIHNNL-KDIYISIADYEGDD-E  | 1066                       |
| Dr-SH3PXD2a     | AGTTITAP-AGSSSPLIAQRNGIPISTVRPKPIEKMLIHNLL-REYVYSIADYRGDE-E   | 967                        |
| Tr-SH3PXD2a1    | SGSSLSTGNVQDALARANQRNGIPVSAVRPKPIEKQLIHNLLGRDVYVSIADYCGDE-E   | 1103                       |
| Tr-SH3PXD2a2    | -SRNRSGTGSSSESLGLGSVKNSLPVSTVKPKP---HI IHNLL-REIYVSIADYHGDE-E | 1051                       |
| Hs-SH3PXD2b     | -----WGTG---KIGENREKAAAASVPNADGLKDSL YVAVADFEGDK-D            | 866 (4 <sup>th</sup> SH3)  |
| Cf-SH3PXD2b     | -----WLVG---KIGENREKVAAPFPSADGSKDSL YVAVANFEGDK-D             | 833                        |
| Mm-SH3PXD2b     | -----RVTG---KVGETREK--AASFLNADGPKDSL YVAVANFEGDE-D            | 863                        |
| Rn-SH3PXD2b     | -----RIAG---KVGETREK--AASFLNADGPKDSL YVAVANFEGDE-D            | 861                        |
| Gg-SH3PXD2b     | -----KVISKAVERGEGRER-TSAPFSPNDVSKEAL YVAVADFEGDE-E            | 800                        |
| Dr-SH3PXD2b     | -----                                                         |                            |
| Lg-p47phox-like | -----                                                         |                            |
| Ci-SH3PXD2      | -----                                                         |                            |
| Ci-p47phox      | -----                                                         |                            |
| Sp-p47phox      | -----LSKPTAQPYCNRDAAYITSSVVDEND                               | 578                        |
| Nv-p47phox-like | -----YAKQDKP---AKHVYVALASYHDEDDD                              | 550                        |
| Mb-p47phox-like | -----PSMPAKPSRPGSNEASSNLRDDEFLVLD TAYNADGEG                   | 733                        |
| Hs-NOX01        | -----                                                         |                            |
| Cf-NOX01        | -----                                                         |                            |
| Mm-NOX01        | -----                                                         |                            |
| Rn-NOX01        | -----                                                         |                            |
| Gg-NOX01        | -----                                                         |                            |
| Xt-NOX01        | -----                                                         |                            |
| Dr-NOX01        | -----                                                         |                            |
| Ol-NOX01        | -----                                                         |                            |
| Tn-NOX01        | -----                                                         |                            |
|                 |                                                               |                            |
| Mm-p47phox      | -----                                                         |                            |
| Rn-p47phox      | -----                                                         |                            |
| Cf-p47phox      | -----                                                         |                            |
| Hs-p47phox      | -----                                                         |                            |
| Gg-p47phox      | -----                                                         |                            |
| Xt-p47phox      | -----                                                         |                            |
| Tn-p47phox      | -----                                                         |                            |
| Tr-p47phox      | -----                                                         |                            |
| Ol-p47phox      | -----                                                         |                            |
| Dr-p47phox      | -----                                                         |                            |
| Mm-SH3PXD2a     | TAGFQEGVSMEVLEKNPNGWWYCQILDDEVKPFK GWVPSNYLEKKN               | 1124                       |
| Rn-SH3PXD2a     | TAGFQEGVSMEVLERNPNGWWYCQILDDEVKPFK GWVPSNYLEKKN               | 1124                       |
| Hs-SH3PXD2a     | TAGFQEGVSMEVLERNPNGWWYCQILDGVKPFK GWVPSNYLEKKN                | 1105                       |
| Gg-SH3PXD2a     | TAGFQEGVCMVLERNPNGWWYCQIMNGVKPFK GWVPSNYLEKKN                 | 1108                       |
| Xt-SH3PXD2a     | TVGFQEGVSMEVLEKNPNGWWYCQILDGGKPFK GWVPSNYLEKKN                | 1111                       |
| Dr-SH3PXD2a     | TMGFSEGTSLVLEKNPNGWWYCQVLDGLQGRK GWVPSNYLERKK                 | 1012                       |
| Tr-SH3PXD2a1    | TMGFTEGTCLEVLERNPNGWWYCQVDSLIPRKG WVPNSNYLERK-                | 1147                       |
| Tr-SH3PXD2a2    | TMGFPEGTSLEVLDRNPNGWWYCKILDNGKQRK GWVPSNYLERKH                | 1096                       |
| Hs-SH3PXD2b     | TSSFQEGTVFEVREKNSSGWWFCQVLSGAPSWEG WIPSNYLRKKP                | 911                        |

|                 |                                               |     |
|-----------------|-----------------------------------------------|-----|
| Cf-SH3PXD2b     | TSSFQEGTVFEVREKSSSGWWFCQVLSGAPSWEGWIPSNYLKKKP | 878 |
| Mm-SH3PXD2b     | TSSFQEGTVFEVREKNSGWWFCQVLSGAPSWEGWIPSNYLRRKP  | 908 |
| Rn-SH3PXD2b     | TSSFQEGTVFEVREKNSGWWFCRVLSGAPSWEGWIPSNYLRRKP  | 906 |
| Gg-SH3PXD2b     | TNSFREGTLFEVREKNSGWWFCKVLTGGPCWEGWIPSNYLRRKP  | 845 |
| Dr-SH3PXD2b     | -----                                         |     |
| Lg-p47phox-like | -----                                         |     |
| Ci-SH3PXD2      | -----                                         |     |
| Ci-p47phox      | -----                                         |     |
| Sp-p47phox      | GLSFEEGQRVEVIKKDDSGWWSVRIGT---EGWVPNTFLEKI-   | 618 |
| Nv-p47phox-like | AISFDEGDEMEVVQQDDSGWWLVKIADK---SGWAPSNFLKQL-  | 590 |
| Mb-p47phox-like | ELSLRPREKVTVLEKATEWWFCR---NAQQQEGWAPANYSKR-   | 773 |
| Hs-NOX01        | -----                                         |     |
| Cf-NOX01        | -----                                         |     |
| Mm-NOX01        | -----                                         |     |
| Rn-NOX01        | -----                                         |     |
| Gg-NOX01        | -----                                         |     |
| Xt-NOX01        | -----                                         |     |
| Dr-NOX01        | -----                                         |     |
| Ol-NOX01        | -----                                         |     |
| Tn-NOX01        | -----                                         |     |
