# Supplementary material for: Molecular evolution of Phox-related regulatory subunits for NADPH oxidase enzymes
Source: PubMed Central journal article supplement (PMC2121648; doi:10.1186/1471-2148-7-178), 2007-09-27
Supplement: 1471-2148-7-178-S14.pdf [file 1471-2148-7-178-S14.pdf]

## Additional File 14

### Alignments of fungal NOXR, Bem1, Cdc24, and CBSn-PB1 amino acid sequences.

To describe species of sequences, we used the following naming: Mg (*Magnaporthe grisea*), Fg (*Fusarium graminearum*), An (*Aspergillus nidulans*), Sc (*Saccharomyces cerevisiae*), Ca (*Candida albicans*), Y1 (*Yarrowia lipolytica*), Sp (*Schizosaccharomyces pombe*), Cc (*Coprinopsis cinerea*), Lb (*Laccaria bicolor*), Pp (*Postia placenta*), Pg (*Puccinia graminis*), Pb (*Phycomyces blakesleeanus*), and Bd (*Batrachochytrium dendrobatidis*). Gray boxes indicate predicted PB1 domains. Red and blue letters indicate the amino acid residues corresponding to the K355 and K382 of PB1 domains of human p67phox and four acidic amino acid residues (D289, D291, D293 and D302) of OPCA motif of human p40phox PB1 domain, respectively. Asterisks indicate identical residues.

PB1 domains were identified by Pfam search program

(<http://www.sanger.ac.uk/Software/Pfam/search.shtml>).

### Alignment of fungal NOXR proteins

|         |                                                              |     |
|---------|--------------------------------------------------------------|-----|
| Fg-NOXR | MSLKQEIETWVAALGRYDNEFEEALNEFGKIGDT-----SKILFNMGVIHATLGEHE    | 53  |
| An-NOXR | MSLKQEIETWVQALEHFDNQEYDLALRSFAAIADT-----SKILFNCVGIYATLGEHE   | 53  |
| Mg-NOXR | MSLKAELETWAAALKAYDEEDFEKSLDLFSRIADS-----SKILTNIGLIYATLGEHE   | 53  |
| Lb-NOXR | MSLKAELETWAAALKAYDEEDFEKSLDLFSRIADS-----SKILTNIGLIYATLGEHE   | 53  |
| Cc-NOXR | MSLKAELETWAAALKAYDDQDFDKALQLFSEIADN-----SKIHTNIGLIYATLGEHE   | 53  |
| Pp-NOXR | MSLKAELETWASALKAYDEENFDKSLQLFSEIGDS-----SKILTNIGLIYATLGEHD   | 53  |
| Pg-NOXR | MSLKAEIETWATALELYDQQNFDDALAAFEDIADS-----SKILFNIGLIYATLGEHE   | 53  |
| Pb-NOXR | MEFKLELDQWLNACAAFDSDKYETAVQSFLSMADN-----AKMHFNIGLIFAIEDDHQ   | 53  |
| Bd-NOXR | MALKEQLAQWASKALDYWDTNDFFGAYEQFVSFADF-----AKIHYNVGMCMARTRNLD  | 53  |
| Y1-NOXR | MLTLQQVVTWLGVELYSKGDYAPALKQFNQLINSPEYSGEVSKVAHNIAAIYYKMEDHE  | 60  |
|         | * * * * *                                                    |     |
| Fg-NOXR | KAVESYQRAIRLDQYLAVAYFQQGVSNFLGDFEEALANFNDDLLYLGRN---AMI----  | 106 |
| An-NOXR | KAVECYQGAIVGLDQYLAIAFYQEGVSNFLGDFEEALANFNDDLLYLGRN---TYI---- | 106 |
| Mg-NOXR | AAVQRFIEATNFDQYLAVAYFQCGVSNFLARYELAYKDFEEALLYLRGN---QAI----  | 106 |
| Lb-NOXR | AAVQRFIEATNFDQYLAVAYFQCGVSNFLARYELAYKDFEEALLYLRGN---QAMYVVF  | 110 |
| Cc-NOXR | EAVKHFIEATGMDQYLAVAYFQCGVSNFLQRYELALKDFEEALLHLRQN---QTMNVS   | 110 |
| Pp-NOXR | AAVEQFTAATQLDQYLAVAYFQCGVSNFLGRYETSLRDFDALLYLRGN---GDI----   | 106 |
| Pg-NOXR | VAIENFRTATSLDQYLAVAYFQCGVSNFLGMYYEAVKDFEDALMYLRGN---LTI----  | 106 |
| Pb-NOXR | RALAAYSRAISMDAYFAVAYFQKGVSNFVMNMEAMHDFDNAYQRLRGNEMIN-----    | 107 |
| Bd-NOXR | EATIAAFSRAITLDEYLSVAYMQIGICQYHMGFEALANFEESFKMLRGN-----       | 103 |
| Y1-NOXR | RATKWFVTALQKDPYLCITHFVLFQCLFEQEKYSEAAKEWDKCLEYMRGN-----      | 110 |
|         | * * * * *                                                    |     |

Fg-NOXR -----DYAQLGLLFLKLYSCEVLFNRLGCLYIYLQQMDAGMQDFSYAVKE-K 150  
 An-NOXR -----DYEQLGLKFRLYSCEVLFNRLGCLYIYLQQIGPMQDLEYASKE-K 150  
 Mg-NOXR -----NYEQLGLKFRLFSAEVLFNKGLAQIYMGRAQEGGLADMEEARRE-K 150  
 Lb-NOXR MVEPYLPYSSIPAHRNQEQLGLKFRLFSAEVLFNKGLAQIYMGRAQEGGLADMEEARRE-K 169  
 Cc-NOXR DDG-----LNSNYEQLGLQFKLYSAEVLFNMGSLIFMGQIEMGLQNFEEARRE-K 160  
 Pp-NOXR -----NYEQLGLKFKLYSAEVLFNKGLAHIYMGQVDQGLAELQEARKE-K 150  
 Pg-NOXR -----DYSQLGLKFRLYSCEILFNKGLSLIYQGAEAEGMIDLQEARKE-K 150  
 Pb-NOXR -----YTQLGLAFRLYACEVLFNRGVCQLYLGLKIDAGLTDLYHAQKA-K 150  
 Bd-NOXR -----FFIDYTLQGMFQVAFACHAIFNIALCHLQRGDTERGVRVYISEAIIKA-V 150  
 Y1-NOXR -----TWINYQPLGLNFTLYSCEVMFNKSMAKIYSGDILPGVSDLSRAGKEHK 158

\* \*\* \* \*\* \*

Fg-NOXR VVEDHNVIDDAINEQAEGY-----TVFSIPVGVVYRP---NEAKVRNLKTKDYLGA 199  
 An-NOXR YRSR-----LTPQGY-----TVFSIPVGVVYRP---NEAKVKNLTKDYLGKS 191  
 Mg-NOXR ATDEHNVIDDAIQEREGY-----TVFSIPVGVLYRP---SEKCLKNSMQKDYMGKA 199  
 Lb-NOXR ATDEHNVIDDAIQEREGY-----TVFSIPVGVLYRP---SEKCLKNSMQKDYMGKA 218  
 Cc-NOXR ATEDHNVIDEAIIRDQGRGY-----TVFSIPVGVLYRP---SEKCLKNAVQKDYMGKA 209  
 Pp-NOXR VTPEHSVIDDAIADRGDGY-----TVFSIPVGVLYRP---AEKCLKNAKTKDYMGKA 199  
 Pg-NOXR QTAEHSVIDDAIADRAEGY-----TVFSIPVGVLYRP---AMSKVKNLASKNYLGQA 199  
 Pb-NOXR MTEEHVIDQAVRDRGRGY-----SVFSIPVGVLYRP---SEARMRQLQANMFAAV 199  
 Bd-NOXR PVDSDVFPDIADIEEAERLGENAADTIMPYEVPVNLVFRP---QEDNLRNAERVDYLGQS 207  
 Y1-NOXR WSADHNRIKAYIYFNAIKDSLHRATHHTKQSQNDGLQRSKLSRSKSNLRSKSLARS 218

\*

Fg-NOXR RLVAASDRANAFTGFAGSEIKNAGKLEVKDDRPADNISFAATNLVKPGLSSR-RQQSEPP 258  
 An-NOXR RVIAANRLSTPAD-----TSQRSVDSVPPFATSHLVQKNLTSRSRQQSEPP 236  
 Mg-NOXR KLVAASDPNDIFTFTGSTR-----LKQGISPSGVFIDRPDIESAVIPSVTRSASVPS 252  
 Lb-NOXR KLVAASDPNDIFTFTGSTR-----LKQGISPSGVFIDRPDIESAVIPSVTRSASVPS 271  
 Cc-NOXR KLVASSDPDDKITTFVGSAR-----LKMGISPAGIYIDRPDIDTPAGAASRSATVPA 262  
 Pp-NOXR KLIATEDASEAFTEFTGVAR-----MRQGVSPGTATDFGP-----GGLQRAATVSN 245  
 Pg-NOXR KLVAATDASETFVGTGSAR-----AAAKTTTTGPVMSTPIEQAPMPPAPGMLRRGTV 252  
 Pb-NOXR DKLSLPNKNFKTALTSIQRNNSILLPDARFQKRVPGAQAAPRQVQPPVSSLAEHGMRA 259  
 Bd-NOXR KVVASVNATDNYTGFSG-----KLTRDLTLLSRSKKDDANSGAKEAALKS 253  
 Y1-NOXR KSMKHKQQLQDNIRNRSSMG-----FGANYTNTFDVSAEKEAKQLAQSSGNVG 270

Fg-NOXR NGRNVFPPTPPPENERPSRAASVRN-----QKPQLAK-----LNIQQAEPN- 299  
 An-NOXR MHRNLFPTPPDADKASLSTGSNGTVRAQPGKAQRPPKLD-----LDRPGAQPA 288  
 Mg-NOXR STAPSRQPADGVRLAGVERSRTAMNPPQSAR-LASNKGPPPR-----PPMSAGASIGRS 305  
 Lb-NOXR STAPSRQPADGVRLAGVERSRTAMNPPQSAR-LASNKGPPPR-----PPMSAGASIGRS 324  
 Cc-NOXR SYPASRPAESIRSAGLERSKTTINVPSNARALTSPQSLSPSSR---LPPVSSAGALGRS 319  
 Pp-NOXR PTPPP-KSDDYVRSALQRANTTIN---VSVDRFRSNPASPAS-----PATSPGSGPPS 295  
 Pg-NOXR ATAGSGMGDGLPGAGMLRRGTSAAITPMMPSSSSGDSPTVG-----IIRRGTTAAR- 304  
 Pb-NOXR IARESSRPMATHIYTDQLPPTPVSSVSHYPRKQNTQYSPIERQRNDSNAGSFSTEE 319  
 Bd-NOXR PASFSAAQTTIAQNTIRVNRKPSVTSISREPIQEGYEQTIT-----MSRSNSATTS 305  
 Y1-NOXR PVGLGIRQSPSMRGSANRSPNPNNGGTPNLGRSQTLGGG-----GHTQSSQLHRS 323

Fg-NOXR RRYEKAASPAD-----ARRPMPRSASTTRTPLQRE---PPPLQLRPKQ----- 339  
 An-NOXR RSTTDLTAPEK-----PRLGTIRTASEPRGQSRQPRGYAPERHVRSSDGYGHRRGASD 341  
 Mg-NOXR NTNITPSRSPNATIGGPVVRGLSVRRPGNASPGNSSPPRAPPKDDARLTFEYDDYLDYSY 365  
 Lb-NOXR NTNITPSRSPNATIGGPVVRGLSVRRPGNASPGNSSPPRAPPKDDARLTFEYDDYLDYSY 384  
 Cc-NOXR NTQITPGRSPSAGMGGPSRVRHPSFPDRIHADMTKADLPDVPAPERITFEYDDYLDYSY 379  
 Pp-NOXR APALS--RNASFAGRMQPTRGLSIRKPGTDAP-----PPSTRGMRTTEFYDYSYLDYSY 346  
 Pg-NOXR -IESTAARPAP-----VPTNNDLRRRPSEAGSTARLNRSATASSGSKPTSRLAPMAEQRE 358  
 Pb-NOXR WADSPHPSISSTSSFSLSLRQADGRRVDSGFESTHEERYSSSSGRSSTKSHKANRYSPP 379  
 Bd-NOXR RKYIPRRLSSN-----NISANTIPGASRVPGTLSRAPSAPLSREGSG----- 347  
 Y1-NOXR QTTGHAHSVAEHPSSANVHRSQSTRAPVTGTSTTEVDLPSTVKMARMNETYKIYQISSE 383

Fg-NOXR --IPEETGSPEDVYAMYSATDGYRNSRGSAGSRRLRPQQYSEED----ASDYEGTINEN 393  
 An-NOXR HGFVSNHSDDAYGMYGEARAMLANG---GRPFQQQGYIDEEYESSPCDEDLVPA 398  
 Mg-NOXR GDAPIPPIAQP-GPDRIAAWARTNANPNYPLVRSGRSAPTSQYTPSSYGGGSLRRKVT 424

Lb-NOXR GDAIPPIAQP-GPDRIAAWARTNANPNYPLVRSGRSAPTSQYTPSSYGGGSLRRKVT 443  
Cc-NOXR DQPPVPQLSAPPTADRVATWARQTPAYPAGVARSTRSAPNSQYAPSSYGGG-SMRRKPT 438  
Pp-NOXR DAP----SALPPVEARPAPAAVRRAP-----SRARAAPQSTYS-----NGSVRRRPT 390  
Pg-NOXR PEKSPRYGSRTRGSLGTESYEDYEDNEPAVPSRSGGSEDRTTNWARNLSTSGSSSGRNR 418  
Pb-NOXR PVPPIPHNASYEGDTSANYGNFDLEMYGSLPTIDTQDNKQDRVRPRLNSNNTAPLEDD 439  
Bd-NOXR --SGQQLFPLRLTRSAGGSSRMGLGDTQNNVDTAAERLNSLTINNNDLPASPAIKLTTS 405  
Y1-NOXR FCLFSIHDNRLKNI VGEQMASLLRGKDKEISSGGGVV GASSPPPEDSTEFVSVESVGRS 443

PB1 domain

Fg-NOXR DF-EMIGQRRGPGSVS---GSRNSRR-----TEVTKIRVKVH-ADEVKLIMITPDTR 440  
An-NOXR SF-ELMGSRPRARSCSRGPARGYSRR-----PEVRRFRVKVHSFEDTRYILIPPTIE 449  
Mg-NOXR KR-NNPRAPSRVQSTYEEEEEGYVSG--EYEDGPFELTLIRVKLHYQDDTRGMTLTPDTP 481  
Lb-NOXR KR-NNPRAPSRVQSTYEEEEEGYVSG--EYEDGPFELTLIRVKLHYQDDTRGMTLTPDTP 500  
Cc-NOXR RR-ATSRQQNRIGSTYEEEEEGYVSG--DYDDGPFEMNLIIRVKLHYQDETTRGMTLAPDLT 495  
Pp-NOXR RR-GTVR--SRYE---EEEEEGYSGEYEREEDGFVKIRVKLHYADDVRGMALSPGMP 444  
Pg-NOXR DP-PAVRRPPANSPYDDPPSDAEYPETVMSGGYAEMTKIRVKLHYGSDTRGMLS--HAM 475  
Pb-NOXR RRGNDQINNNDYSNIRAHPPQPTASVSTPTLKEGSINTKIRVKVHYTDTR-ILLVPHIT 498  
Bd-NOXR NR-----SNVSTDSIRVKCHYIESR-FIVVPINIS 434  
Y1-NOXR DDVDDIYDIDDYGTTPASTGQRSANQSVNRSGGSIKSNAAATVATGSPPARSKPTPIDVD 503

Fg-NOXR FETLSDKVRDKFNKRR-FKIKVKDDMPNGDMITVGDQDDLEMVDSVKDEARKQRTET 499  
An-NOXR FAEFETRIREKFGFQMA-LKIKMQDE---GDMITMVDQEDL DLLMASREIARREGSEM 504  
Mg-NOXR FADFMDKVTAKFGKQINGLGLKFKDED---GKVTLRDESDYELAIETARESAKGPPEG- 537  
Lb-NOXR FADFMDKVTAKFGKQINGLGLKFKDED---GKVTLRDESDYELAIETARESAKGPPEG- 557  
Cc-NOXR FNEFIVKITA KFNKSFSGLGLKFKDED---GKVTLRDESDYELAIETARENAKGRAGK 552  
Pp-NOXR WEEFLERVTKFGRELDGLGMKFKDED---GMVSLRDEMDYELAIETAREQAKGPPEG- 500  
Pg-NOXR IRGFLGKSDQEVFLKSRSSGDEIQGRE---GSMVSIIMDDDWESAVETARSYAKGRAEG- 531  
Pb-NOXR FNELLGRVREKFGAPPS-TRLQYKDEE---EEMVLMIDDDDLHLVRQTSRQKHGDFGVE- 553  
Bd-NOXR FRDLRERVSAKFG-VQGLLSLKYKDEE---EFMTMVNDDDLDEAVAVSAQG----- 482  
Y1-NOXR LAREMRKVSFDSSLSTPKLNKLVDKIQGTTTRDSVSSVSDSIHAPKATKHRVQINYIRPVT- 562

Fg-NOXR G-----KMEI 504  
An-NOXR G-----KMEI 509  
Mg-NOXR -----RLEI 541  
Lb-NOXR FFDSFSLTH-----CFLIEMGLGGRKIKQRI PDDPRNLS 591  
Cc-NOXR LEICSSLYYGQYKRKLGKLVVLRVHRSKANQLCLDSNMGLSGRKVKQRI GNDPRNLS 612  
Pp-NOXR -----RLEI 504  
Pg-NOXR -----KVEI 535  
Pb-NOXR -----KIEI 557  
Bd-NOXR -----RLEI 486  
Y1-NOXR -----AKVCS 567

Fg-NOXR WILQL----- 509  
An-NOXR WVEERRMI----- 517  
Mg-NOXR WCMDL----- 546  
Lb-NOXR WADDAARFGSNYLSKFGWDASQGLGVDGEGRTSHIKVSHKLDMLGIGAAHQKDPNGIAWK 651  
Cc-NOXR WADDAARFGSNYLSRFGWDASKGLGAE GEGRTSHLKVAKLDMLGIGAAHQKDPNGIAWK 672  
Pp-NOXR WCTDE----- 509  
Pg-NOXR WVEDAGFL----- 543  
Pb-NOXR WCVT----- 561  
Bd-NOXR WCFLLDPPK----- 495  
Y1-NOXR FVAEECSSDPTPIPTIPVKKKAVKDYSTRSPYPSVASSSYEDTTSWKS LPLLPNDHA 627

Fg-NOXR -----  
An-NOXR -----  
Mg-NOXR -----  
Lb-NOXR QNKDFENLLKRLNEN-----ATEIVDGKEEQ 677  
Cc-NOXR QNRDFENLLKRLNAAGGEGGAIEVVKTEVSGFVSSTKEVQVEVKKEEKEKEDEMVDDEKK 732  
Pp-NOXR -----  
Pg-NOXR -----

Pb-NOXR -----  
Bd-NOXR -----  
Y1-NOXR AHKTDQRLRELR-----ERDRREIRDGFIDR 653

Fg-NOXR -----  
An-NOXR -----  
Mg-NOXR -----  
Lb-NOXR DVVKEETPKKKRKQKGDEEKDTKKR-----RKTEDSSPSADEVVPDSLADP 725  
Cc-NOXR ERKKEKKEKDKKDKDKDKDKGKRKRSEVDGDEESGSQKKMKTEEASPTPQSSDSTPSEQ 792  
Pp-NOXR -----  
Pg-NOXR -----  
Pb-NOXR -----  
Bd-NOXR -----  
Y1-NOXR DTGMTPPQSHQFDPTNTVAPGRSRNTKFLTVDLDDPNHQGNNGRSKSPGSPMSPFILVT- 712

Fg-NOXR -----  
An-NOXR -----  
Mg-NOXR -----  
Lb-NOXR APVRVAPRYRAHRARATAAKSITSKSAAAISEILGIAPSSGLSVTTTQ-----TTGK 777  
Cc-NOXR PKKAFVPRHRAHRARAIAAKSISMKSSTHISEILGIAPESSTTSAASGSISPAPPDQGK 852  
Pp-NOXR -----  
Pg-NOXR -----  
Pb-NOXR -----  
Bd-NOXR -----  
Y1-NOXR -----

Fg-NOXR -----  
An-NOXR -----  
Mg-NOXR -----  
Lb-NOXR LTSLTDDA-TIEKLTTSTKSVADYFKEKLLVRA-----TQSESTTPISEQDA 823  
Cc-NOXR LTVISEDVPELEKITTTSTKSVADYFKERLLAKANAKAQSSGSSASTPQPSATKDEEMDEA 912  
Pp-NOXR -----  
Pg-NOXR -----  
Pb-NOXR -----  
Bd-NOXR -----  
Y1-NOXR -----

Fg-NOXR -----  
An-NOXR -----  
Mg-NOXR -----  
Lb-NOXR YDLPRSLGSGRARFEIQEDDSEMG-ARRVGLSKFSSLMSSQFLAATSTLSTPPEKTQSE 882  
Cc-NOXR EEKPRGGLGFARVQWESQESTSVQSDTLRMGLSKFSSLMSTFLS--STFSSSTSESTSP 970  
Pp-NOXR -----  
Pg-NOXR -----  
Pb-NOXR -----  
Bd-NOXR -----  
Y1-NOXR -----

Fg-NOXR -----  
An-NOXR -----  
Mg-NOXR -----  
Lb-NOXR DVATTQLDMVEEQTSEEKRRKKKDKDEKKEKSKDKVTRTEVKDPDTLQTASLDDVDR 942  
Cc-NOXR ATEEKKETGEEDEKETEEQRKERKRLKKEEKARKKAEKEKRKAACAATSEAKGGDAED 1030  
Pp-NOXR -----  
Pg-NOXR -----  
Pb-NOXR -----  
Bd-NOXR -----  
Y1-NOXR -----

Fg-NOXR -----  
 An-NOXR -----  
 Mg-NOXR -----  
 Lb-NOXR KARKAQRKAIEKKARKAAENNLH 964  
 Cc-NOXR AGKEREKESKSKKSKKEKKT- 1051  
 Pp-NOXR -----  
 Pg-NOXR -----  
 Pb-NOXR -----  
 Bd-NOXR -----  
 Yl-NOXR -----

## Alignment of fungal Bem1 proteins

|          |                                                                |     |
|----------|----------------------------------------------------------------|-----|
| Sc-Bem1  | ---MLKNFKLSKRDSNGSKGRITSADIS-----TPSHDNGSVIKHIKTVPVRYLS        | 47  |
| Ca-Bem1  | ---MIKTFRKSRRSSNS-----SSPKKTTIS                                | 23  |
| Mg-Bem1  | ---MKALRRS IKGDKDKQPQ-----                                     | 17  |
| Fg-Bem1  | ---MKALRRS IKGDKDKGP-----                                      | 16  |
| An-Bem1  | ---MKALRRSLKGEKDSKPHHHHQ-----                                  | 21  |
| Yl-Bem1  | ---MIKGIIRSLKGEKTTSSGSAN-----                                  | 21  |
| Sp-Bem1  | ---MLKIKRTWKTHS-----                                           | 12  |
| Cc-Bem1  | ---MKSLRKS L NGNKDSS-----                                      | 15  |
| Lb-Bem1  | ---MKSLRKS L NGNKDSS-----                                      | 16  |
| Pp-Bem1  | ---MKTLRKS L NGHKDNS-----                                      | 15  |
| Pg-Bem1  | ---MKVLRSLHKEKDRSTSTSSPTKPDFNSHLLPPLSAKHNSKQQQQQQQQQQQQQ       | 55  |
| Pb-Bem1A | -----                                                          |     |
| Pb-Bem1B | MNLKEKVKPPRSRSLRSTRLSVVKN-----                                 | 23  |
| Bd-Bem1  | -----MSPELPHRGHLTVAPVR-----                                    | 17  |
|          |                                                                |     |
| Sc-Bem1  | SSSTPVKSQRDSSPKNRHNSKDI TSPEKVIKAKYSYQAQ--TSKELSFMEGEFFVYVSGDE | 105 |
| Ca-Bem1  | RVSS-----TSSNQTSHDG--ILQSPKKVIRALYDYEPQ--GPGELKFFKGDFHVLDDV    | 74  |
| Mg-Bem1  | -----ISIAPKSAVAIVPPKKVIRALYDYEQAQ--STQELSF SRGDFHVI GRE        | 63  |
| Fg-Bem1  | -----VTPKSAVAIVPPKKVIRALYDYEAR--SSQELSF SRGDFHVI GRE           | 60  |
| An-Bem1  | ---HHHQQHHLSTIPKSAVAI LPPKKVIRALYDYQPEPGNTQELAFSKGDFHVISRE     | 77  |
| Yl-Bem1  | -----SLVSDKNPLHTNPPKMVIRALYDYEPQ--GPGELSFCKGDFHVISNE           | 67  |
| Sp-Bem1  | -----RILDKDPFSIEPPRKVIRALYDY TAR--KATEVSFAKGDFHVI GRE          | 57  |
| Cc-Bem1  | ---KLQISTPLPIPTMSKPPSAILPPQKVI RANSSYKSQ--APQELSFQKGDFHVLKDA   | 70  |
| Lb-Bem1  | ---KLQISTPVP IPTISKPPSAVLPQKVI RALFNYSRQ--APQELSF SKGDFHVL RDA | 71  |
| Pp-Bem1  | -----PSITTLPLRLSKPSGAVLPSPKVIKALQTYKAN--APQELSF EKGDFHVLNDV    | 67  |
| Pg-Bem1  | QPTQPFASLAAGNHNL TNPRSIGKPPTLV IKAITAYKSN--RIVELSFQKGDFHVVGER  | 113 |
| Pb-Bem1A | -----SLAAPKKI I KALYDYQAQ--GPDEL SFSEGDFYHVTARE                | 37  |
| Pb-Bem1B | -----KISTPINFQQSAITPKIVAKALFDYKAQ--TQREISFHQGDYFHV DKT         | 70  |
| Bd-Bem1  | -----GSSHPASIFNLPPKKVVRANANYTAR--FAGELSF AKGDFHVI NER          | 62  |
|          | * * * * *                                                      |     |
|          |                                                                |     |
| Sc-Bem1  | KD-----WYKASNPST--GKEGVVPKTYFEVFDRTKPSSVNG-----                | 140 |
| Ca-Bem1  | DDELHKEAEANGWIEATNPMT--QLKGMVPI SYFEIFDRSRPTVTAS-----          | 119 |
| Mg-Bem1  | NDTD-----WYEACNPALPDARGLVPVAFQALGRTERDSAQSDTSVTRTS-----        | 109 |
| Fg-Bem1  | NDDD-----WYEACNPALPDARGLVPVTFQALGRTERDSAQSDGGQP-----           | 103 |
| An-Bem1  | DDSD-----WYEACNPLIPTARGLVPVTF FEVIGKTQRDSSGS-----              | 115 |
| Yl-Bem1  | QDSE-----WFEAFNPLR--NVRGMVPVPYFEVLGKKEGITS PDPNEALLPEERKALH    | 118 |
| Sp-Bem1  | NDKA-----WYEVCPNAA--GTRGFVPVSHFEEIGKT VKS-----                 | 90  |
| Cc-Bem1  | EGS-----AWYEAHNPVT--GARGIVPRAMFEEF GKNAPPVRHS-----             | 107 |
| Lb-Bem1  | DDVG-----TWYEAHNPVT--GARGIVPRNMFEEFNKNIAXTF FDSALRLWYL-----    | 117 |
| Pp-Bem1  | NNEG-----WYEAHNPAT--GARGLVPCHMFEEFGR-----                      | 97  |
| Pg-Bem1  | DDHEG-----SWFEASNPAT--GARGIVPKDCFELFGRKQNELPSTTPTATAFP-----    | 160 |
| Pb-Bem1A | NDSK-----WFEACNPAT--NTKGLVPVAFQVLDKAERN-----                   | 70  |
| Pb-Bem1B | N-PH-----WFEAFNPVT--HAKGIVPVNYFQILEKNDTP-----                  | 102 |
| Bd-Bem1  | PDGLN-----YEVINPIQ--RIRGIVPTSHFASLDKVVQEEANARNPDYNGDDQNNYGY    | 113 |

\*\* \* \*\* \*

Sc-Bem1 -----SNSSSRKVTNDSLNMG----- 156  
Ca-Bem1 -----SNSFTNSIDIQHQQG-----IHNGTGNRNL 146  
Mg-Bem1 APVPSKNDH-----DSGYAETSAPVPSTPGFS-----NRDSKS-GKSG- 147  
Fg-Bem1 -PSPPKNDH-----DSGYSESPAMHPAPAVMSPTTNSAPQGHQRNSKSVGKTG- 151  
An-Bem1 IDLGKKKEPH-----DSGFADRATSSGSEFGSGSSKSYQSHPAFPRTSMGKAGG 165  
Yl-Bem1 RSSQSKHAQHSPQHVLANGLDVSQSMQNL SLGGASGGGHTREPSMAGASDRSSQGKST- 177  
Sp-Bem1 -ERSDSGSQ-----ISFTDLTNSSTT-----RSSISELHSGS 123  
Cc-Bem1 -----QFSTPGGGGFKSMHLP-----GSGSAPSPTPK 135  
Lb-Bem1 --IPS-----PLRVRTSQVGPRTALPSP-----SRPESSIPTPK 150  
Pp-Bem1 -----GPSKRVAD-----AGADRPLSTVK 118  
Pg-Bem1 --PRSSAPGYQ-----SSANNPPGSPLLVVRTPLS-----AEPFRQSHPSK 199  
Pb-Bem1A -----LVAQPLNDLNIKSDSGFSDSADTMLPTPSK 102  
Pb-Bem1B -----NHLGDPT-----RTETQLP-PVKK 120  
Bd-Bem1 TDDGYDDSYNN-----HHTSDPYGQPNNNYMGNHGRSPLSPASPGSNQAHGISASGSGR 169

Sc-Bem1 --SLYAIVLYDFKAEKAD-----ELTTYVGENLFICAHNCEWFIKPIG----- 199  
Ca-Bem1 NQTLYAVTLYEFKAERDD-----ELDIMPENLIICAHHDYEFIAKPIIN----- 191  
Mg-Bem1 -AMVYGI VMYDFAERAD-----ELQAQAGEAII VIAQSNPEWFAKPIG----- 191  
Fg-Bem1 -AMVYGI VMYDFAERAD-----ELEAKAGEAII VIAQSNPEWFAKPIG----- 195  
An-Bem1 GAMVYGVVYDFQAERPD-----ELDAKAGEAII VIAQSNPEWFAKPIG----- 210  
Yl-Bem1 -PTLHGVLVYDFQAERPD-----ELQASKGDNI I IQAQSNHEWFAKPIG----- 221  
Sp-Bem1 -QPLFGIVQDFDFAERPD-----ELEAKAGEAII I IARSNHEWFAKPIG----- 167  
Cc-Bem1 HQVYIAI VMHDFSAERPD-----ELDAKRGDAITVVAQSNREWFAKPIG----- 180  
Lb-Bem1 TQVFYAIVLHDFVAERAD-----ELDAKRGDAITVVAQSNREWFAKPIG----- 195  
Pp-Bem1 QQAFYAI VLVHDFTAERAD-----ELDAKAGDTITVVAQSNREWFAKPIG----- 163  
Pg-Bem1 TQPLYGIVQHDFVAERPD-----ELDAKRGEPI I VIAQSNHEWFAKPIG----- 244  
Pb-Bem1A TSHLYGVVLYDFQAERSD-----ELNAKEGEPI I VIAQSNPEWFAKPIG----- 147  
Pb-Bem1B MQPLYGVVLYDFQAERFD-----ELDARAGESILVIAQSNVEWFAKPIG----- 165  
Bd-Bem1 GDKQLVSVLVQRSEQRDDGLWVFTVELKMTDNSSNILFRTYDDFWILQVSLLNHFPSSEG 229

\* \*\* \*

Sc-Bem1 RLGPGPLVPVGFVSIIDIATG-----YATGNDVIEDIKSVNL--PTVQEWKSNIARY 249  
Ca-Bem1 RLGPGPLVPVSVYKIIDLLNPNSHYTSIDTSRRSQUIVINGFNI--PTVEQWKNQTAKY 249  
Mg-Bem1 RLGPGPLIPVSFIEIRDMSANT-----PVDP--EGAVRRAGI--PRVEEWKMAAEY 240  
Fg-Bem1 RLGPGPLIPVSFVEIRDMSDK-----AIQNP--GDAIKRAGV--PKVEEWKMAAEY 244  
An-Bem1 RLGPGPLIPVSFIELRDMQSGQ-----AVADP--LEAVRRAGV--PKVEEWKMTAEY 259  
Yl-Bem1 RLGPGPLIPASFIEIRDIVTGK-----AVDV--ESALRASGL--PKVEEWKMAADY 270  
Sp-Bem1 RLGPGPLIPLSFIQLRDLKGTGA-----VIKDV--SEAVLRISCI--PRVEDWKRAADY 217  
Cc-Bem1 KLGRPGLIPVSFVEIHDPTTGA-----PIVD--V-DALIDRGDL--PKVEDWKRAMLY 229  
Lb-Bem1 RLGRPGLIPVSFVEIHDPTGK-----AIPD--V-QGLMDRGEL--PKVEDWKRAMLY 244  
Pp-Bem1 RLGRPGLIPVSFVEVRDPATGL-----AVQD--I-MALIDGGAL--PRVEEWKRAMLY 212  
Pg-Bem1 RLGPGPLIPVSFVEVDVNTGK-----ALAPNV--QDLIRSSV--PAVEEWKATAAY 295  
Pb-Bem1A RLGPGPLIPVSFVQVRDAVSGQ-----IITVNSN--LRQTSSNFI--PNVEEWKMTQGY 198  
Pb-Bem1B RLGPGPLIPVSFVEIRDALTGH-----TITSSQ-----PSNPL--PRVEEWKRMTMGH 211  
Bd-Bem1 RLDQPRTIPLPTPRTLTPPEQAQRHQLDSYMQELIKLPSHIMNAPSVKRFLMVRSGD 289

\* \* \* \* \*

Sc-Bem1 K-----ASNISLGSVE----- 260  
Ca-Bem1 Q-----ASTVPLGISGSGTPPT----- 267  
Mg-Bem1 K-----NSSITLGKFEVGGAPQQ----- 258  
Fg-Bem1 K-----NSSITLGKFEVGGPQPG----- 263  
An-Bem1 K-----NSSISLGKIETTGSMS----- 277  
Yl-Bem1 K-----ASSIALGNFDDPQQHSQ----- 289  
Sp-Bem1 K-----KSSIPLGKFS--GETQTM----- 235  
Cc-Bem1 K-----QNSISLGVIDPPSRG----- 245  
Lb-Bem1 K-----QNSIALGVIDPPSRG----- 260  
Pp-Bem1 K-----ANSISLGVLEESVAAN----- 229  
Pg-Bem1 K-----GNSIPLGKFDAATSPMP SATNGGSFNHPTSSRSASTSHTRQPSGAGYD 346  
Pb-Bem1A -----EASSIPLGRIDKQPQQQLQT----- 219

Pb-Bem1B DNPEKLNHPSSSALYYAPNTIDTFSRIPTH----- 241  
 Bd-Bem1 LDTPMNIREFDVSETLLDLLTEYQEEADLR**K**LVLG----- 324

(PBI domain of Bd-Bem1)

Sc-Bem1 -----QQQQSITKPQNSAKLVDG----- 280  
 Ca-Bem1 -----SANSQYFDNHTMTSNRSSSGS----- 288  
 Mg-Bem1 -----QAIEQGMDR-MSLQP--TDSR--SSQGQLNGKLQ--A 289  
 Fg-Bem1 -----QGIEQGMR-MSIQQQ-QHSRQPSQNGTQSGYASQ--P 297  
 An-Bem1 -----VTSGMER-MSVRQSADHVSQNGHANAYHNRNAS 312  
 Yl-Bem1 -----QALQHALRGQQTLEHQVQQEHQTLQERQSLQEQ--A 325  
 Sp-Bem1 -----PSLSPSTENLQINNDVTYQAATDNSSTFPQSVANELTP 273  
 Cc-Bem1 -----GPPTSPFLS--TMAEPMPPREPEPP----RP 271  
 Lb-Bem1 -----SVQSNYSYPREDYQSPPPQAASEPA----RA 288  
 Pp-Bem1 -----FAKAQATKQMPPLPTATPPPSQPQPVKQKPPSPISRP 267  
 Pg-Bem1 RPPSGRGPQHGSWHGAGGDPSSAYDHSRQSSANTPWNPNTSYNSRQSPTQQGRDYQDEP 406  
 Pb-Bem1A -----QQSQSQFQSPIQDTINEGRSVKSGSSCPTHRLPSEEY 256  
 Pb-Bem1B -----NSVNTLLGSSNAGSGAGGSASASASAGAIITTAEQIA 278  
 Bd-Bem1 **-EEIICWKEPDYISFEELMYHAEE****R**LEFRFQALMY**K****D**CE**Q**LIPLR**S**NT**D**LRLLV**T**TL**S**K 383

Sc-Bem1 -----ELLVKASVESFGLEDEKYWFLVCCELS----- 307  
 Ca-Bem1 -----SISIEASVDSYQLDHGRYQYSITARLN----- 316  
 Mg-Bem1 MQPQNAYPTP-----KPSTQLYAPVQASIPRYCAEEKYWFVIEAILE----- 332  
 Fg-Bem1 RTSQQPQPHQSQV--QKPAAPLHAPLEARIPRYCAEDKYWFVIEAVLE----- 344  
 An-Bem1 KASIAPSTHQQP--PHSQQLVAPIAASIPRYCFDNDKYWYIEVKME----- 359  
 Yl-Bem1 LREQALREN-----YAAPATGPLVVAASVESFALHSGRYWLVNAELE----- 369  
 Sp-Bem1 LQTLESRTASIASKNKDMSSSEPTVVAAMVENYMRDDQYWYLVRVMS----- 322  
 Cc-Bem1 QTPECLPEG-----ILLSADVVSFHYEMEEYWFRVDAIFQPYSSPGSGQLP 317  
 Lb-Bem1 QSPDILPEG-----ILLSADVVSFHYEMEEYWFHQN-----VLP 322  
 Pp-Bem1 ISPKLLPEG-----ILLSADVVSFHYEMEEYWFRIHAVFQPYDPSDHSPLP 313  
 Pg-Bem1 YPPQSGPEGDGYATVDELREYGVVVHASVESFHFEGHYWFHLRAHFSRIS--EDGRDE 464  
 Pb-Bem1A LSRHNSTSRRTATADGTQHTQAVVSAVIDSFIEGQYWFVYTRLS----- 305  
 Pb-Bem1B QEIGNLSIGPRDNRD--NTRSRVVAATVDSYVPEGDQFWFIVFAQMS----- 324  
 Bd-Bem1 **KLTFYGSKKSSNRLNGR**TSDPASTVRTASQLTMQLESANSNTTVPTLN-----IADS 436

\*

Sc-Bem1 NGKTRQLKRYQ-----DFYDLQVQLLDAPFAEAGKLRDAGGQWSKRIM 351  
 Ca-Bem1 NGRIRYLRYQ-----DFYDLQVKLLELFPYEAGRIENS----KRII 355  
 Mg-Bem1 DGRKYELSRYYE-----DFYDFQIALLTEFPAEAG----NTGTQKRTL 371  
 Fg-Bem1 DGRQWELSRYYE-----DFYDFQIALLTEFPAEAG----NTGTQKRTL 383  
 An-Bem1 DGRCWELSRYYH-----DFYDFQIALLTQFEEEAG----NRG-KPRTL 397  
 Yl-Bem1 DGSRRRLCRYQ-----DFYVFQINLLGVFEEAAG----HND-QPRLL 407  
 Sp-Bem1 DGKHRNLCRYE-----DFYDFQIALLTQFEEEAG----RND-ERRVI 360  
 Cc-Bem1 PAKQLILFRVYE-----DFYEFQVTLRLTFPREAG----QQPPHPRVL 356  
 Lb-Bem1 PAKQLILFRVYN-----DFYDFQVSLLDNFPREAG----REPPHPRTL 361  
 Pp-Bem1 PAKQLVLFVRSYN-----DFYDFQVEILNAPFHEAG----RPDVNTRIL 352  
 Pg-Bem1 QTTVLVLYRLEY-----DFYDFQIALLTQFEEEAG----DEDGAP-NL 502  
 Pb-Bem1A NNTHRILYRLEY-----DFYDFQINLLNDYPVEAG----KAK-RERIL 343  
 Pb-Bem1B DRRHRVLYRLEYALNVHAFVCLGGLRTDFYDFQVTLQDYPVEAG----KTG-KPRIL 378  
 Bd-Bem1 VNSTTGAVQVSE-----NRVNQDTPVGSLSASAGQG-IRMARSLPRTI 479

\*

Sc-Bem1 PYIPG-----PVPYVNSITKKR---KEDLNIVYADLVNL---PDYISR 389  
 Ca-Bem1 PSIPG-----PLINVNSISKLR---REKLDYYLSNLIAL---PSHISR 393  
 Mg-Bem1 PYMPG-----PVNYVTDAITEGR---LHNLDAYVKNLLAQ---PTYISR 409  
 Fg-Bem1 PYMPG-----PVNYVTDAITEGR---LHNLDAYVKNMLNQ---PPYISR 421  
 An-Bem1 PFMFG-----PVAHVTDATSDGR---RHNLDYIKKLLAM---PPHITR 435  
 Yl-Bem1 PFMFG-----PLTYVNSISMQR---RHNLDYVRKLMAL---PAYISR 445  
 Sp-Bem1 PYMPG-----PVDDVNELISSQR---AMDLDVYLKEMCRL---PARLLE 398  
 Cc-Bem1 PYMPG-----PAKVDVDDALTATR---REELDEYIHGLCALSRSGYRHILE 398  
 Lb-Bem1 PFMFG-----PAQDVDDALTSTR---RGELDEYIHGLCALGKSGSRNILE 403  
 Pp-Bem1 PYMPG-----PSDQVDNEVTAAR---RIELDDYLHKLCELQLYS-RYILE 393  
 Pg-Bem1 PRMPG-----PSDNVDELVCAQR---VEDLSTYLHELCEL---PLYIRE 540  
 Pb-Bem1A PYMPG-----PLAVIDQEITAER---QRDLNTYCKDLLGL---PRYISE 381

Pb-Bem1B PFMPG-----PQTEVDERLTAKR---QTELNIYCQELFQL---PRYLVE 416  
 Bd-Bem1 PSPPTGLLRDNTTVVPATIPESIMSTSIPRRQSVSDNAGASSYHLSLKINRQSSPSHHSQ 539  
 \* \* \* \* \*

Sc-Bem1 SEMVHSLFVVLNNGFDREFER----- 410  
 Ca-Bem1 SEEVKLKFDVLDNGFDRET----- 413  
 Mg-Bem1 CNLVK-QFFAPREGDYEMD----- 427  
 Fg-Bem1 CNLVR-QFFAPREGDYEID----- 439  
 An-Bem1 CALVR-QLFAPRPGDFEID----- 453  
 Yl-Bem1 SVIMQ-ELFALRPGDVAAG----- 464  
 Sp-Bem1 NELVK-LFFLPLDGDVESP----- 416  
 Cc-Bem1 HEVLR-QFLALKPGDSEIDPRVDEIDALFGEYPED---DYDREYAQEIADQVGRMKV 453  
 Lb-Bem1 HLVVR-KFLALKPGD-----MGRMRV 423  
 Pp-Bem1 DKLIR-EFLALKPGDAEVEVEPRMKEIAALARAPDANGAHESDNVDPEYGVTTISQLRI 452  
 Pg-Bem1 SELVY-EFLGPREGDVELEGDPGNLGLDRSPTEVEG-----EVVEYLQR 584  
 Pb-Bem1A GDLVQVQLFGIHEGDIETD----- 400  
 Pb-Bem1B SPLVQDVLVFLHEGDVEID----- 435  
 Bd-Bem1 FRPFATTSTLESFARSALDASQPLSSLKPFISGSMNAR-----RDGF 581

Sc-Bem1 -----DENQNIKTLENDTATFATASQTSNFASTNQ----- 442  
 Ca-Bem1 -----AINKRFSKPISQKSNHQDRLSQYSNFNVLQSQSQSQ----- 450  
 Mg-Bem1 -----ANGEDEYRMSGGSQSS--PDSPNGGISQSSRNNL----- 462  
 Fg-Bem1 -----PNDNENEYRLSQGSQLSS--MESPAGG---SQNNL----- 469  
 An-Bem1 -----PSAFGEDARFSGGSQHSSGHELSPASRQSSQSQNGP----- 490  
 Yl-Bem1 --PTDDLQPLTPETESFDDAAQAEARAKGIHPKSLGPTNVSSSVSY----- 509  
 Sp-Bem1 -----HPTSTMPEALPREP----- 430  
 Cc-Bem1 SDSG--HSDGSDYEDEGYAASPQHRPYDR--HPYGTAPVNGRHSR----EESL---- 500  
 Lb-Bem1 QDD---QRSDGSDYEDEGYAPSLQKAYDRGRHPYVQGS---ERSSQ---DNTF--- 468  
 Pp-Bem1 SGEANGQSGSDGYGD---GDMNSPYDRDSSAYVYGEKEPSRMST----EQTYNTTQ 503  
 Pg-Bem1 MDSSRGEDGRLADLNESI SRLSTGNGPLEAHHQYQHRRRQSSQASQPSHHP----- 636  
 Pb-Bem1A -----HDPRSDP-----AMFT----- 411  
 Pb-Bem1B -----YDPRTGAPRPESVELSHSIL IPEAFGSSSTMNTFTPF----- 471  
 Bd-Bem1 PINTRPLSSGPASISHLRHYQAMQRRSSSCSPNKTGSHGSNTDSEIGDVLTEDEVALMI 641

Sc-Bem1 -----DNLT-----GEDLKNKKLSDLS----- 463  
 Ca-Bem1 -----QQQYAHHSRGS DNSPTNESSGNL INSSSHNDSSLS----- 487  
 Mg-Bem1 -----SSGGYNNNLAPSQQRGLSAQPPMMRQASSLSQPSQA----- 499  
 Fg-Bem1 -----NGSGYG---LAPS-----HPDMQTQASSLSQPSQA----- 496  
 An-Bem1 -----SERSSHSHSHSHSHSHQRSQTSSIPNGKPPMVRQQS----- 527  
 Yl-Bem1 -----SEGTEESRPVSTASGLMPPEPTGLPGGGHQRMTSVS----- 546  
 Sp-Bem1 -----LSFSLPEKAPEKATNIS----- 447  
 Cc-Bem1 -----RVQAHQNHQRAGSTSSFHTHTQHTQSYAS-HSRNHSSERISPI SRDSYSNGQS 553  
 Lb-Bem1 -----RLQGQNHQRNASTPSTASFRSSQAMSSRS-HSHSHS----- 504  
 Pp-Bem1 PLRPRSRTNGHERTENGISLYGRSSPGVAALRYDSYHAHSQS-----RSSVASSQE 555  
 Pg-Bem1 -----SRMSKGTGPAGYHQRGQRSQDLRPFSSSTTSSEG----- 671  
 Pb-Bem1A -----QQPQQSVSQPMPGAI VGGAYYDT----- 434  
 Pb-Bem1B -----GRNSNPIKDISQTNTATATATATATTT----- 499  
 Bd-Bem1 SEHLVNGDEMGGSEVGGGTASDRDRSSRLDGEGLDGDHRMSG----- 685

PB1 domain

Sc-Bem1 -----GSKQAP-----AQSTSGLKTTKIKF--YKDDIF 490  
 Ca-Bem1 -----SSPPPPQTVTTNTTITTDSSSKQPKVKVF--YFDDIF 525  
 Mg-Bem1 -----SLS---PGIPQAG---AFMKVKL--SYNGDLI 523  
 Fg-Bem1 -----SLG---GGMQAPSQPPSAMKIKM--YFNGDLI 523  
 An-Bem1 -----SLT---QVSTSSG-GALKVKV--NFQDDLI 551  
 Yl-Bem1 -----TVGPTPDNPAVNTPQSSSNSVKVKV--FYQDDLI 578  
 Sp-Bem1 -----IPE----SAPTTAG-STCKVKV--RLGDETF 471  
 Cc-Bem1 RWDHTQPTPTTANSFSSASRTRSQTATS VNLNTPPISAANPQTAFVKIKIFDRVADLI 613  
 Lb-Bem1 -----TTNLNPPISAANPQTAFVKIKIFDRVSDDLI 537  
 Pp-Bem1 PSPVSTRASHAGSTATSRTSGSRSRQSNATYNPPI SASNPQIAFMKIKIFDKSAEDIV 615  
 Pg-Bem1 -FSSHLPSHTSTSSVPVGSRVTS LTPAGPGEHPGSANHNPNSTGFLRIKIKYQRQTDDLI 730  
 Pb-Bem1A -----IKIKIVHK--DDIF 446



Pb-Bem1B -----TAAKNAIGSSNLIKVKIAYKEEMF 523  
Bd-Bem1 -----MSFGSVSHGLLGGDVTRNIYRWKETRIDIERQRRNSEPDLLTIP (KR) SPSGFEIARA 739

Sc-Bem1 ALMLKGDTTYKELRSKIAPRIDTDNFKLQTKLFDG---SGEEIKTDSQVSNI IQAKLKI 546  
Ca-Bem1 VLLIPTNLRLQDLKSKLFRLELDITYKYKPDQQKPTSES IHLFLKND FEDFLIENET 585  
Mg-Bem1 AIRVPSDIQFRELFDKITERLRIQPGEEVQLSYKDDITNGKLALMNDQDLIYAMQRNEKL 583  
Fg-Bem1 AIRVPTDISFQALYDKICDRLKIPANEEIQLFYKDEPTGDKPSMISDNLDLDFALQRNEKL 583  
An-Bem1 AIRVPSDINVQQLKEKLMDRKIN--DEIVVQYKDEASGAYVDLISDSDLDTAIQRNSKL 609  
Yl-Bem1 AIRVPSDIDYATLHDLRCELRVET---LSLLYKAD-DGSRVVISNDEDLGAAVYGKNKL 635  
Sp-Bem1 ALRVPSDISFEDFCERLTNKLGECE---HLSYRDTNANKVPLNNVDLDRKACQSQESGV 527  
Cc-Bem1 AIRVHPKVSHHELMKVVQARLGSELR---VLKYRDSLNTFVGLDTDELRRAWMEGTDKH 670  
Lb-Bem1 AIRVHPKVTHSELMDKVQARLGGEVGV---NLRYRDSMTNTFVGLDSNEELRSWMEGTDKH 594  
Pp-Bem1 AVRVPRTVYQAQLLEKASQRLNCHVE---RLRYLDSETRQFIDLETDEDLRFWLDDETEKH 672  
Pg-Bem1 AIRAPTGVQFLELLQRTIQRVGAEVR---SIRFRDE-SGVAYSTGGSVPINANNGARLIG 787  
Pb-Bem1A AIKVPANTLDVLRDRIDHRLG-FNVQ---LNYKDEITGESMELSEERDMEEA----- 495  
Pb-Bem1B AIKVPIDCSFQKLHDRVQERLGGSNVR---LRYKDTQGESLPLETESDIAEAFESSLK- 579  
Bd-Bem1 STLMEPGMFRRQFLQNKAAQRERKRPPMFITRNFDLFLALYGVYGGDVYPSDDDEDTDSNA 799

Sc-Bem1 SVHDI----- 551  
Ca-Bem1 SNNNNSEIDFENEI I KEKLGFEVNDDEKQFSILFDKCKLMVLVY----- 630  
Mg-Bem1 LFYHRYSNSFDR----- 595  
Fg-Bem1 LLYVEAV----- 590  
An-Bem1 TLYVGLA----- 616  
Yl-Bem1 VLYAS----- 639  
Sp-Bem1 LLFAERRRF----- 536  
Cc-Bem1 VLYAD----- 675  
Lb-Bem1 VLYA----- 598  
Pp-Bem1 LLNKRRLPTPRPHRKMETDNASAAVDAMIRGALDLDHGI SDDSIQLSNDSSASLSQE 732  
Pg-Bem1 IDNDGDLDRWINSRSLVLYVD----- 808  
Pb-Bem1A -----  
Pb-Bem1B IGKLI LYATPL----- 590  
Bd-Bem1 TGFAIDSEDLVDEEMGRGGRSERLTYEEVGRNHHDGRFARNQTCIGTDAYHDECYDHAR 859

Sc-Bem1 -----  
Ca-Bem1 -----  
Mg-Bem1 -----  
Fg-Bem1 -----  
An-Bem1 -----  
Yl-Bem1 -----  
Sp-Bem1 -----  
Cc-Bem1 -----  
Lb-Bem1 -----  
Pp-Bem1 DNDLRDDDKALEWHEVIELQAFSERKAWIEEKITFLGKMPPIEVFAGLDAVRSSAVEVPG 792  
Pg-Bem1 -----  
Pb-Bem1A -----  
Pb-Bem1B -----  
Bd-Bem1 TSETALLLAQSGLTNGIATVPGDGGNTVGVHGTSSSHTGTSESKAFFMLLKAFVGTGV 919

Sc-Bem1 -----  
Ca-Bem1 -----  
Mg-Bem1 -----  
Fg-Bem1 -----  
An-Bem1 -----  
Yl-Bem1 -----  
Sp-Bem1 -----  
Cc-Bem1 -----  
Lb-Bem1 -----  
Pp-Bem1 LPTRAELEEWLAEHDRIEKETEIFDSGELRKLKKFTKAAAQRNLSPEDDTLIELTLTTIY 852  
Pg-Bem1 -----  
Pb-Bem1A -----

Pb-Bem1B -----  
Bd-Bem1 LFLPKGFLNGGLGFSMWLLVVLGYLTLHCMILLVDTSRSLGGKSFGDIGGHIYGPYMRQL 979

Sc-Bem1 -----  
Ca-Bem1 -----  
Mg-Bem1 -----  
Fg-Bem1 -----  
An-Bem1 -----  
Yl-Bem1 -----  
Sp-Bem1 -----  
Cc-Bem1 -----  
Lb-Bem1 -----  
Pp-Bem1 ELDKLFHLLRDRSDNLDLLGIRLTWEERRMAAWSELRSVLSDIREFLASRARWTPNAYDS 912  
Pg-Bem1 -----  
Pb-Bem1A -----  
Pb-Bem1B -----  
Bd-Bem1 VLASIAISQMFGCCAYFIFVGNLRDLLMVSSGCRIIWPDWVFLILQLAVYIPLSWVRRRI 1039

Sc-Bem1 -----  
Ca-Bem1 -----  
Mg-Bem1 -----  
Fg-Bem1 -----  
An-Bem1 -----  
Yl-Bem1 -----  
Sp-Bem1 -----  
Cc-Bem1 -----  
Lb-Bem1 -----  
Pp-Bem1 VPVEDELMPEPETKRRNSVVSINSTFSESSNLPLVLSRTSRYKLAESLSRNAAQFAS 972  
Pg-Bem1 -----  
Pb-Bem1A -----  
Pb-Bem1B -----  
Bd-Bem1 KNFGITSLIADVIFILLGLGYIFMYDLSVIGQTGIKPTAWINIESFSLFVGTAMFAFEGIC 1099

Sc-Bem1 -----  
Ca-Bem1 -----  
Mg-Bem1 -----  
Fg-Bem1 -----  
An-Bem1 -----  
Yl-Bem1 -----  
Sp-Bem1 -----  
Cc-Bem1 -----  
Lb-Bem1 -----  
Pp-Bem1 RVSSLRHASKIAGAGKALDKLIDHSRRPVPDELLDEQDKLEDHGINEMEDVGKFMVTVMVQ 1032  
Pg-Bem1 -----  
Pb-Bem1A -----  
Pb-Bem1B -----  
Bd-Bem1 LILPIAESMQHPQKFSVLSWCILLIGTIFITIGTLGYMSFGDQIETVLFNLPLQNPLVN 1159

Sc-Bem1 -----  
Ca-Bem1 -----  
Mg-Bem1 -----  
Fg-Bem1 -----  
An-Bem1 -----  
Yl-Bem1 -----  
Sp-Bem1 -----  
Cc-Bem1 -----  
Lb-Bem1 -----  
Pp-Bem1 WKKADEIYVETMKDKSAAQTLLEEIEVATSSHPTSROQVAFLSRATALAKRLAMRDNPAS 1092  
Pg-Bem1 -----  
Pb-Bem1A -----

Pb-Bem1B -----  
Bd-Bem1 SIQFFYAVAIMLSFPLTIYPVIRITEQKLFHGHSRTGKSSPVVWQKNLYRAVLACMLGV 1219

Sc-Bem1 -----  
Ca-Bem1 -----  
Mg-Bem1 -----  
Fg-Bem1 -----  
An-Bem1 -----  
Yl-Bem1 -----  
Sp-Bem1 -----  
Cc-Bem1 -----  
Lb-Bem1 -----  
Pp-Bem1 SGTTFPLPTHLLFPDQSGSNEEVIRMLSSELAAGEHVRKAEQCAKEYHTSLEAVKRVET 1152  
Pg-Bem1 -----  
Pb-Bem1A -----  
Pb-Bem1B -----  
Bd-Bem1 ISWAGSTSLDKVVSLVGCFACIPLSFIYPALFHLHITTSWWARVTDWMLVGFGTVAMVYT 1279

Sc-Bem1 -----  
Ca-Bem1 -----  
Mg-Bem1 -----  
Fg-Bem1 -----  
An-Bem1 -----  
Yl-Bem1 -----  
Sp-Bem1 -----  
Cc-Bem1 -----  
Lb-Bem1 -----  
Pp-Bem1 ACKAASDLSVQLESIVQRLKDGVPDAGDGTTPDLSTEACLEGSRHASFLTVLPSILQEL 1212  
Pg-Bem1 -----  
Pb-Bem1A -----  
Pb-Bem1B -----  
Bd-Bem1 TFVTLEQWAINGPDTPRDRCHDAMGTQLELPSFGLW----- 1316

Sc-Bem1 -----  
Ca-Bem1 -----  
Mg-Bem1 -----  
Fg-Bem1 -----  
An-Bem1 -----  
Yl-Bem1 -----  
Sp-Bem1 -----  
Cc-Bem1 -----  
Lb-Bem1 -----  
Pp-Bem1 QDADASVDGLLPGARVAMLHLDRPGVDPQFKLEAGSNIDRLIQLRREAAQTRDEVTARTS 1272  
Pg-Bem1 -----  
Pb-Bem1A -----  
Pb-Bem1B -----  
Bd-Bem1 -----

Sc-Bem1 -----  
Ca-Bem1 -----  
Mg-Bem1 -----  
Fg-Bem1 -----  
An-Bem1 -----  
Yl-Bem1 -----  
Sp-Bem1 -----  
Cc-Bem1 -----  
Lb-Bem1 -----  
Pp-Bem1 ALNDIKRTWTSMGGLAKDLTSVQDDIAAAAERQIWHQVRQHDAPPTPESPVTHLPTPTI 1332  
Pg-Bem1 -----  
Pb-Bem1A -----

|          |                                                              |      |
|----------|--------------------------------------------------------------|------|
| Pb-Bem1B | -----                                                        |      |
| Bd-Bem1  | -----                                                        |      |
|          |                                                              |      |
| Sc-Bem1  | -----                                                        |      |
| Ca-Bem1  | -----                                                        |      |
| Mg-Bem1  | -----                                                        |      |
| Fg-Bem1  | -----                                                        |      |
| An-Bem1  | -----                                                        |      |
| Yl-Bem1  | -----                                                        |      |
| Sp-Bem1  | -----                                                        |      |
| Cc-Bem1  | -----                                                        |      |
| Lb-Bem1  | -----                                                        |      |
| Pp-Bem1  | SPASVLATLDGLATRLEEKVSTPLSAVAPAMGESLNKYLTECSTALSLLLDHTRYLTWW  | 1392 |
| Pg-Bem1  | -----                                                        |      |
| Pb-Bem1A | -----                                                        |      |
| Pb-Bem1B | -----                                                        |      |
| Bd-Bem1  | -----                                                        |      |
|          |                                                              |      |
| Sc-Bem1  | -----                                                        |      |
| Ca-Bem1  | -----                                                        |      |
| Mg-Bem1  | -----                                                        |      |
| Fg-Bem1  | -----                                                        |      |
| An-Bem1  | -----                                                        |      |
| Yl-Bem1  | -----                                                        |      |
| Sp-Bem1  | -----                                                        |      |
| Cc-Bem1  | -----                                                        |      |
| Lb-Bem1  | -----                                                        |      |
| Pp-Bem1  | VSMQNGASTMGAVRDDFHGLQVQTEELKLRFDDETEGVLSGTLTGDELLTEGGLSSQLK  | 1452 |
| Pg-Bem1  | -----                                                        |      |
| Pb-Bem1A | -----                                                        |      |
| Pb-Bem1B | -----                                                        |      |
| Bd-Bem1  | -----                                                        |      |
|          |                                                              |      |
| Sc-Bem1  | -----                                                        |      |
| Ca-Bem1  | -----                                                        |      |
| Mg-Bem1  | -----                                                        |      |
| Fg-Bem1  | -----                                                        |      |
| An-Bem1  | -----                                                        |      |
| Yl-Bem1  | -----                                                        |      |
| Sp-Bem1  | -----                                                        |      |
| Cc-Bem1  | -----                                                        |      |
| Lb-Bem1  | -----                                                        |      |
| Pp-Bem1  | HAEESVQSFIDDLPRRVTFVAPAHSEPHSSPPKGPRLTSVEFNLAMVQHAAAAELPVDL  | 1512 |
| Pg-Bem1  | -----                                                        |      |
| Pb-Bem1A | -----                                                        |      |
| Pb-Bem1B | -----                                                        |      |
| Bd-Bem1  | -----                                                        |      |
|          |                                                              |      |
| Sc-Bem1  | -----                                                        |      |
| Ca-Bem1  | -----                                                        |      |
| Mg-Bem1  | -----                                                        |      |
| Fg-Bem1  | -----                                                        |      |
| An-Bem1  | -----                                                        |      |
| Yl-Bem1  | -----                                                        |      |
| Sp-Bem1  | -----                                                        |      |
| Cc-Bem1  | -----                                                        |      |
| Lb-Bem1  | -----                                                        |      |
| Pp-Bem1  | SHLDQTVRSDSNAYSMMLSGALKLLEYKATHFQSAKAAKIVDAALASVVSKVRRVADVVT | 1572 |
| Pg-Bem1  | -----                                                        |      |
| Pb-Bem1A | -----                                                        |      |

|          |                                                               |      |
|----------|---------------------------------------------------------------|------|
| Pb-Bem1B | -----                                                         |      |
| Bd-Bem1  | -----                                                         |      |
|          |                                                               |      |
| Sc-Bem1  | -----                                                         |      |
| Ca-Bem1  | -----                                                         |      |
| Mg-Bem1  | -----                                                         |      |
| Fg-Bem1  | -----                                                         |      |
| An-Bem1  | -----                                                         |      |
| Yl-Bem1  | -----                                                         |      |
| Sp-Bem1  | -----                                                         |      |
| Cc-Bem1  | -----                                                         |      |
| Lb-Bem1  | -----                                                         |      |
| Pp-Bem1  | SVQDSMDRPDEQQNSERLGKLSAMVNEVLQVEVQEIARSFSPVRGLMHRLRTLPGVSEIT  | 1632 |
| Pg-Bem1  | -----                                                         |      |
| Pb-Bem1A | -----                                                         |      |
| Pb-Bem1B | -----                                                         |      |
| Bd-Bem1  | -----                                                         |      |
|          |                                                               |      |
| Sc-Bem1  | -----                                                         |      |
| Ca-Bem1  | -----                                                         |      |
| Mg-Bem1  | -----                                                         |      |
| Fg-Bem1  | -----                                                         |      |
| An-Bem1  | -----                                                         |      |
| Yl-Bem1  | -----                                                         |      |
| Sp-Bem1  | -----                                                         |      |
| Cc-Bem1  | -----                                                         |      |
| Lb-Bem1  | -----                                                         |      |
| Pp-Bem1  | AADGIVASRQRALEDAAEQFATWKENAATLHEQITLALQAERARQIERLRLQEEREQAAA  | 1693 |
| Pg-Bem1  | -----                                                         |      |
| Pb-Bem1A | -----                                                         |      |
| Pb-Bem1B | -----                                                         |      |
| Bd-Bem1  | -----                                                         |      |
|          |                                                               |      |
| Sc-Bem1  | -----                                                         |      |
| Ca-Bem1  | -----                                                         |      |
| Mg-Bem1  | -----                                                         |      |
| Fg-Bem1  | -----                                                         |      |
| An-Bem1  | -----                                                         |      |
| Yl-Bem1  | -----                                                         |      |
| Sp-Bem1  | -----                                                         |      |
| Cc-Bem1  | -----                                                         |      |
| Lb-Bem1  | -----                                                         |      |
| Pp-Bem1  | EERARLAREEAETLAKAELDRIEQERRETEERARREQUEELEERERLEAENRAKEERSIPQ | 1752 |
| Pg-Bem1  | -----                                                         |      |
| Pb-Bem1A | -----                                                         |      |
| Pb-Bem1B | -----                                                         |      |
| Bd-Bem1  | -----                                                         |      |
|          |                                                               |      |
| Sc-Bem1  | -----                                                         |      |
| Ca-Bem1  | -----                                                         |      |
| Mg-Bem1  | -----                                                         |      |
| Fg-Bem1  | -----                                                         |      |
| An-Bem1  | -----                                                         |      |
| Yl-Bem1  | -----                                                         |      |
| Sp-Bem1  | -----                                                         |      |
| Cc-Bem1  | -----                                                         |      |
| Lb-Bem1  | -----                                                         |      |
| Pp-Bem1  | GIGLILGSSELLEPVQETDEHSMTREIYGPEAKDDLFGQLQVLPVTADPLSQHTSILRPQI | 1812 |
| Pg-Bem1  | -----                                                         |      |
| Pb-Bem1A | -----                                                         |      |

|          |                                                                 |      |
|----------|-----------------------------------------------------------------|------|
| Pb-Bem1B | -----                                                           |      |
| Bd-Bem1  | -----                                                           |      |
|          |                                                                 |      |
| Sc-Bem1  | -----                                                           |      |
| Ca-Bem1  | -----                                                           |      |
| Mg-Bem1  | -----                                                           |      |
| Fg-Bem1  | -----                                                           |      |
| An-Bem1  | -----                                                           |      |
| Yl-Bem1  | -----                                                           |      |
| Sp-Bem1  | -----                                                           |      |
| Cc-Bem1  | -----                                                           |      |
| Lb-Bem1  | -----                                                           |      |
| Pp-Bem1  | LALRKRLRSLHINDVVRPSQKSDLSPEDYRKRMDKELLAIVSGVDLPPSIIDDPLTN       | 1872 |
| Pg-Bem1  | -----                                                           |      |
| Pb-Bem1A | -----                                                           |      |
| Pb-Bem1B | -----                                                           |      |
| Bd-Bem1  | -----                                                           |      |
|          |                                                                 |      |
| Sc-Bem1  | -----                                                           |      |
| Ca-Bem1  | -----                                                           |      |
| Mg-Bem1  | -----                                                           |      |
| Fg-Bem1  | -----                                                           |      |
| An-Bem1  | -----                                                           |      |
| Yl-Bem1  | -----                                                           |      |
| Sp-Bem1  | -----                                                           |      |
| Cc-Bem1  | -----                                                           |      |
| Lb-Bem1  | -----                                                           |      |
| Pp-Bem1  | AELHSLRTEVKASVDLMP TVHKLADLAIALRNCDDALSDLLEHIDSYP SAPLGM LSSSHT | 1932 |
| Pg-Bem1  | -----                                                           |      |
| Pb-Bem1A | -----                                                           |      |
| Pb-Bem1B | -----                                                           |      |
| Bd-Bem1  | -----                                                           |      |
|          |                                                                 |      |
| Sc-Bem1  | -----                                                           |      |
| Ca-Bem1  | -----                                                           |      |
| Mg-Bem1  | -----                                                           |      |
| Fg-Bem1  | -----                                                           |      |
| An-Bem1  | -----                                                           |      |
| Yl-Bem1  | -----                                                           |      |
| Sp-Bem1  | -----                                                           |      |
| Cc-Bem1  | -----                                                           |      |
| Lb-Bem1  | -----                                                           |      |
| Pp-Bem1  | SDPTLPPESQLSARIAFTKSLVD TMTTQYS AVSGDPRAVSEHDRVQTWMELEAMASDRV   | 1992 |
| Pg-Bem1  | -----                                                           |      |
| Pb-Bem1A | -----                                                           |      |
| Pb-Bem1B | -----                                                           |      |
| Bd-Bem1  | -----                                                           |      |
|          |                                                                 |      |
| Sc-Bem1  | -----                                                           |      |
| Ca-Bem1  | -----                                                           |      |
| Mg-Bem1  | -----                                                           |      |
| Fg-Bem1  | -----                                                           |      |
| An-Bem1  | -----                                                           |      |
| Yl-Bem1  | -----                                                           |      |
| Sp-Bem1  | -----                                                           |      |
| Cc-Bem1  | -----                                                           |      |
| Lb-Bem1  | -----                                                           |      |
| Pp-Bem1  | NGTKSRPNSVMSSGRSSRASAVSTA AAKAAPTKKAAGYSRLSVGGSDARYLAPPPNRRTT   | 2052 |
| Pg-Bem1  | -----                                                           |      |
| Pb-Bem1A | -----                                                           |      |

|          |                                                                |      |
|----------|----------------------------------------------------------------|------|
| Pb-Bem1B | -----                                                          |      |
| Bd-Bem1  | -----                                                          |      |
|          |                                                                |      |
| Sc-Bem1  | -----                                                          |      |
| Ca-Bem1  | -----                                                          |      |
| Mg-Bem1  | -----                                                          |      |
| Fg-Bem1  | -----                                                          |      |
| An-Bem1  | -----                                                          |      |
| Yl-Bem1  | -----                                                          |      |
| Sp-Bem1  | -----                                                          |      |
| Cc-Bem1  | -----                                                          |      |
| Lb-Bem1  | -----                                                          |      |
| Pp-Bem1  | SGSSTGTRPRSTSRVSSISSNRSVSGPTPNVSSATLHGSTFASRQRTTSVTSGAPMKTPL   | 2112 |
| Pg-Bem1  | -----                                                          |      |
| Pb-Bem1A | -----                                                          |      |
| Pb-Bem1B | -----                                                          |      |
| Bd-Bem1  | -----                                                          |      |
|          |                                                                |      |
| Sc-Bem1  | -----                                                          |      |
| Ca-Bem1  | -----                                                          |      |
| Mg-Bem1  | -----                                                          |      |
| Fg-Bem1  | -----                                                          |      |
| An-Bem1  | -----                                                          |      |
| Yl-Bem1  | -----                                                          |      |
| Sp-Bem1  | -----                                                          |      |
| Cc-Bem1  | -----                                                          |      |
| Lb-Bem1  | -----                                                          |      |
| Pp-Bem1  | KQPHLASSKASSRPRSNTNTTPRTASPAFSETSSRSISRGLNASVSSVARSSWSRAPRQ    | 2172 |
| Pg-Bem1  | -----                                                          |      |
| Pb-Bem1A | -----                                                          |      |
| Pb-Bem1B | -----                                                          |      |
| Bd-Bem1  | -----                                                          |      |
|          |                                                                |      |
| Sc-Bem1  | -----                                                          |      |
| Ca-Bem1  | -----                                                          |      |
| Mg-Bem1  | -----                                                          |      |
| Fg-Bem1  | -----                                                          |      |
| An-Bem1  | -----                                                          |      |
| Yl-Bem1  | -----                                                          |      |
| Sp-Bem1  | -----                                                          |      |
| Cc-Bem1  | -----                                                          |      |
| Lb-Bem1  | -----                                                          |      |
| Pp-Bem1  | SFPALLRSPPKNKAVPTAKKPYIANPKNKLDVAVGDVINSLPVNIINVEVVADTWKQSGK   | 2232 |
| Pg-Bem1  | -----                                                          |      |
| Pb-Bem1A | -----                                                          |      |
| Pb-Bem1B | -----                                                          |      |
| Bd-Bem1  | -----                                                          |      |
|          |                                                                |      |
| Sc-Bem1  | -----                                                          |      |
| Ca-Bem1  | -----                                                          |      |
| Mg-Bem1  | -----                                                          |      |
| Fg-Bem1  | -----                                                          |      |
| An-Bem1  | -----                                                          |      |
| Yl-Bem1  | -----                                                          |      |
| Sp-Bem1  | -----                                                          |      |
| Cc-Bem1  | -----                                                          |      |
| Lb-Bem1  | -----                                                          |      |
| Pp-Bem1  | YWIGDQDPKLCFCRILRSQTMVVRVGGGWSELSRF IKDHFADAFRILPESPRLGSRREEKW | 2292 |
| Pg-Bem1  | -----                                                          |      |
| Pb-Bem1A | -----                                                          |      |

|          |                                                                |      |
|----------|----------------------------------------------------------------|------|
| Pb-Bem1B | -----                                                          |      |
| Bd-Bem1  | -----                                                          |      |
|          |                                                                |      |
| Sc-Bem1  | -----                                                          |      |
| Ca-Bem1  | -----                                                          |      |
| Mg-Bem1  | -----                                                          |      |
| Fg-Bem1  | -----                                                          |      |
| An-Bem1  | -----                                                          |      |
| Yl-Bem1  | -----                                                          |      |
| Sp-Bem1  | -----                                                          |      |
| Cc-Bem1  | -----                                                          |      |
| Lb-Bem1  | -----                                                          |      |
| Pp-Bem1  | ISSATLSQAAESI ALSNPKTPEVVSSHLP SFALSTPSGTSPKSIKTVSSPGSPLTPLQFL | 2352 |
| Pg-Bem1  | -----                                                          |      |
| Pb-Bem1A | -----                                                          |      |
| Pb-Bem1B | -----                                                          |      |
| Bd-Bem1  | -----                                                          |      |
|          |                                                                |      |
| Sc-Bem1  | -----                                                          |      |
| Ca-Bem1  | -----                                                          |      |
| Mg-Bem1  | -----                                                          |      |
| Fg-Bem1  | -----                                                          |      |
| An-Bem1  | -----                                                          |      |
| Yl-Bem1  | -----                                                          |      |
| Sp-Bem1  | -----                                                          |      |
| Cc-Bem1  | -----                                                          |      |
| Lb-Bem1  | -----                                                          |      |
| Pp-Bem1  | RRADRESPVRAETPTRPPRNTAAKPARPPVWRP                              | 2407 |
| Pg-Bem1  | -----                                                          |      |
| Pb-Bem1A | -----                                                          |      |
| Pb-Bem1B | -----                                                          |      |
| Bd-Bem1  | -----                                                          |      |

### Alignment of fungal Cdc24 proteins

|          |                                                                |                 |
|----------|----------------------------------------------------------------|-----------------|
| Mg-Cdc24 | MNQASRRQPGLNAPRDTKLAGSVQSNVDVNNQQPLLPTPAPKPPDQSLPGPSRRSASENIGV | 60              |
| Fg-Cdc24 | -----                                                          |                 |
| An-Cdc24 | -----                                                          |                 |
| Sp-Cdc24 | -----                                                          |                 |
| Pb-Cdc24 | -----                                                          |                 |
| Cc-Cdc24 | -----                                                          |                 |
| Lb-Cdc24 | -----                                                          |                 |
| Pp-Cdc24 | -----                                                          |                 |
| Yl-Cdc24 | -----                                                          |                 |
| Pg-Cdc24 | -----                                                          |                 |
| Ca-Cdc24 | -----                                                          | MEHPPAAL 8      |
| Sc-Cdc24 | -----                                                          |                 |
|          |                                                                |                 |
| Mg-Cdc24 | GHPTCPVAFTPPNALAMAYAPLLRTNTTPIFSSSTGGVARLQGTMGSTGPAVGIPPLRAS   | 120             |
| Fg-Cdc24 | -----                                                          | MNHAP-----RAS 8 |
| An-Cdc24 | -----                                                          |                 |
| Sp-Cdc24 | -----                                                          | MAYFQDRKTS 10   |
| Pb-Cdc24 | -----                                                          |                 |
| Cc-Cdc24 | -----                                                          |                 |
| Lb-Cdc24 | -----                                                          |                 |
| Pp-Cdc24 | -----                                                          |                 |



Y1-Cdc24 -MNGSSRRLSPPNDNLAHQMLHQEINLLPSSPYTKTPQQRKSSSQSTPSLSTLSPSTQ 59  
Pg-Cdc24 -----MTNPPPTPSTSSFNYQNPFSSTRSS 27  
Ca-Cdc24 RTFSTQSTSSLNSVSTVSSSRIVSSGPVNIINNFNKPSTPKDHLFYRCESLKRKLQKIPGM 68  
Sc-Cdc24 MAIQTRFASGTSLSDLKPKPSATSISIPMQVMNKPVTEQDSLFIHCANIRKRLEVLPLQ 60

Mg-Cdc24 QLSGTTLHN-STTSLSSLASASTVVPQAQGGQVATSNIINQKADASRSLYQICMSLK-- 177  
Fg-Cdc24 QLSGSTAYTGSSASLSSLATATTITPT-NGGPVHATANIINQKADASRSLYQICISLK-- 65  
An-Cdc24 -----MADTAGLNPG----GPVAEDNIINRRGNEG--IYQSCVNLK-- 35  
Sp-Cdc24 SRSLPSYINHSTQNLVGP RKDETNLSEYMKLRLLQSPSQVIYNLENTVSLYRRCNLNR-- 68  
Pb-Cdc24 -----MPSCLIESPQKPIQ----GQSLYHTCLSVL-- 26  
Cc-Cdc24 -----MASQAAARKKSI ISSQNLQIETPVAGNTLLNKSASQATSLYQQCASLR-- 48  
Lb-Cdc24 -----MATVAGRKKSIVISTAGLTIDTPVATNGLLNKAASQSTSLYQQCSALR-- 47  
Pp-Cdc24 -----MASAAGRKKSIVISATPTIESPIANNTLLNKAASQSTSLYQQCSALR-- 47  
Y1-Cdc24 NSTYPTPRLRSMTPTMSMSSVQSTAPTSVAPMPVANLVMNRQADSEKSLYNMCKTMR-- 117  
Pg-Cdc24 TTTTHTMTTTTTSASSHTSLNQHSANLSIDMPIATSSVVNKTANRSASLYQNCLETR-- 85  
Ca-Cdc24 EPFLNQAFNQAEQLSEQQALALAQERSNGNGHNSNGKRHQSLDGAMNRLSVGSDSSSIQGS 128  
Sc-Cdc24 KPFLQLAYQSSSEVLSEKQLLSQKQHQLLKSNGANRSDSLAPTLRSSSISTATSLMS 120

Mg-Cdc24 -QRLAQVPGFEEYMSLMDQW-----EAEDPEGGIVESVWKLRLMGTPLIVIFNLL 226  
Fg-Cdc24 -QRLAQVPGFGPYLDELDP-----DPVDP-----LWNLFRRSGYPLLLIYNAL 107  
An-Cdc24 -KRLAEVPGFEPYLRMEMEE-----DLAQGNSDPVASLWNYLRHGYPLLA IYNAS 84  
Sp-Cdc24 -KRLMDISELAFFDSIHREALNSSFKILEFKDIEFDDPVTEIWLFCRLGYPLCALFNCL 127  
Pb-Cdc24 -DRLALVNGFQQFLDSP-----VQKTQLLNTDPVTKLWNLQCLGTPLYTLFNAL 74  
Cc-Cdc24 -SRLMRIRGFSYFFNLAAES-----TDDRQSTDPVTQLWDIFSLGISLCYIFDQL 97  
Lb-Cdc24 -SRLMLIRGFPHYFNLATP-----PDSRQSTDPVTQLWDLFALGVPLCYIFDLL 95  
Pp-Cdc24 -TRLLQVQDFPEWFTVSSPP-----DSSRRSTDPVTQLWDFALGVPLCYLFNLL 96  
Y1-Cdc24 -DRFHDI EQVRPFLEDSEMSIIVP---ITHLPPSIPLDPVTQLWSLFRLGAPLCILFNML 173  
Pg-Cdc24 -ALLRRVPGFEAGPWITETK-----NPNLLSVTQTLEIFRLGSPLCFLYNAL 132  
Ca-Cdc24 LTRMATNASTSSLISGMPNNTLFTFTAGVLPANISVDPATHLWKLQQGAPFCVLI NHI 188  
Sc-Cdc24 MEGISYTNNSNPATPNMEDTLLTFS--MGLPITMDCDPVTQLSFLQGGAPLCILFNVS 178

\*

Mg-Cdc24 K-----PENPMSFDPTP---DAKKAKMYIYKFAEQCKN----E 257  
Fg-Cdc24 R-----PNEELKVDSSANEAKKSKIAIFKFKVQACMK----E 141  
An-Cdc24 D-----PGAPLEIDTSKVP-EARRPKAATFKFLQAAIQ----E 117  
Sp-Cdc24 P-----VKQKLEVNSSVLENTNCKASLYRFMLMCKN----E 161  
Pb-Cdc24 D-----PKEPLTLEYNHNLNQANNAKAIYVHFLVSCRK----E 108  
Cc-Cdc24 --D-----QNFNKINNSQFNPEKYEANPDKERKHAIALFAMQVRNQQ--VM 139  
Lb-Cdc24 PAE-----AGFNKINNSFTAD-YDANPDRAQKRAIALFAMQIRTDE--VT 138  
Pp-Cdc24 P-----APFSPIN-IDTDPKSFDTA NEKTKKRISALFSMQIK----- 132  
Y1-Cdc24 QP-----RTPLTVDPHAAANRASIDVRTCKRSVYDFVQGCKA----E 211  
Pg-Cdc24 LNPPLSPPELANLPLPPGKTWQNLKPLKVLWCPREDLKGCCQKSAAHFIMALKTELGWGT 192  
Ca-Cdc24 LP-----DSQIPVVSSDDLRIKCKSVYDFLIAVKT----Q 219  
Sc-Cdc24 KP-----QFKLPVIASDDLKVCKKSIYDFILGCKK----H 209

\*

Mg-Cdc24 LGIED--IFTISDLLKN-DTGFVKVTTVVNQVLIDIAQTRGMLIQQQYPEDDMPDSGKS 314  
Fg-Cdc24 LEIPSTQSFVITDLMGT-DTSGFVKVTQVVNYVLDRAEERGYLMQAQPDVESNEPTGG-- 198  
An-Cdc24 MAFPQQECFLITDLYGE-NTIGFTKVIKMNVRVLDILEIQGQLKKP-SDTAMAAPAAG-R 174  
Sp-Cdc24 LGLTDAALFSISEIYKP-STAPLVRALQTIELLLKKEYVSNTTKSSSTPSPSTDDNVPTG 220  
Pb-Cdc24 LDFAEEDLFGITDIFLD-DTNGFVKVNTITKILQILQDR-GVISAKSPNRNSDPNAPKD 166  
Cc-Cdc24 QAIIPGLEPFAITDLWDRKSTDGLVKVINSVTAIVEYLPEDVF EQAPTSPTLS-AHESSD 198  
Lb-Cdc24 QKIPGCELFVTDLWDRKLT DGLVKVINTVTAIVDHLQPDVFEESSPPTLS-SHDSSD 197  
Pp-Cdc24 -QLEGCEQFTVTELDWRNSTDGFVKVNNVINLVRCLPDEVFVPEQLSSPHLASAQQSTD 191  
Y1-Cdc24 LGYSDELFTISNLFSE-NTGDLIKVMRTVSMVETLEARHLLPPKTAPITAPATRDAR- 269  
Pg-Cdc24 EIDEIQENGLMVNMLYDVNTNATVKVISNVLRLHLLKALGVLLPSEDELVPHSNELNV 252  
Ca-Cdc24 LNFDDENMFTISNVFSD-NAQDLIKI IDVINKLLAEYSDASDSGGGDEDEDVNMVQITDER 278  
Sc-Cdc24 FAFNDEELFTISDVFAN-STSQLVKVLEVETLNMSSPTIFPSKSKTQQIMNAENQHRHQ 268

Mg-Cdc24 KMSYR-----DYIVRELV DTERKYVQDLENLHD----- 342

Fg-Cdc24 QMTYR-----DHI IRELV DTERKYVQDLENLHD----- 226  
 An-Cdc24 KLTKR-----EHILKELLETERDYVHHLQNLQA----- 202  
 Sp-Cdc24 TLNSLIASG-----RRVTAELYETELKYIQDLEYLSN----- 252  
 Pb-Cdc24 TR-----DKIVLELLETERKYVQDMELLQASTKEHKIYIPYNILT 206  
 Cc-Cdc24 SLHHDSPAGPAPPTNAREARRIHITREILETERKYVEGLEIMQ----- 242  
 Lb-Cdc24 SLL-DALPQ----PNGKEAARNNIVREMVETERKFVQDLEIMQVRVFPVPLMSLALPIQP 251  
 Pp-Cdc24 SLDADGAAP---PPERDGGARYNIVRELVETERKYVQDLEVMQ----- 231  
 Yl-Cdc24 -----YNVVQELLQTERKYVQDLEILHD----- 292  
 Pg-Cdc24 AMDDR-----ARVVKIILESERKYVQDLEVLQN----- 280  
 Ca-Cdc24 S-----KVFREI IETERKYVQDLELMCK----- 301  
 Sc-Cdc24 PQQSSKKHN-----EYVKI I KEFVATERKYVHDLEILDK----- 302

\* \*

Mg-Cdc24 -----LKKALTEGIVTGDVAYQIFGNIDAILDFQRRFLIRVETTNSMPGEVQQWG 393  
 Fg-Cdc24 -----LKKTLEQQGEIPGDTLHQIFFNINAILDFQRRFLIRVETTNSMPALNQRWG 277  
 An-Cdc24 -----LKKELEDTGALTGDASHQIFLNLNLLDFSRFLIRLEQHYARPEEQQNWG 253  
 Sp-Cdc24 -----YMVILQQKQILSQDTILSIFTNLNEILDFQRRFLVGLMNLSPVEEQRLG 303  
 Pb-Cdc24 KFFVYFIQSYMRELQIQKILSPDTVHYLFANLALVDFQRRFLIQLEDIAEKPAQDQQLG 266  
 Cc-Cdc24 -----KYATQLAQQNIIDQDTIHLLFPNLNLLNFQRKFLIRFESTLEQPWSEQRWG 294  
 Lb-Cdc24 A---GYVQKYSNALSQANLMDQDTIHLLFPNLKLLNFQRKFLIRFESTAELPWQDQRWG 308  
 Pp-Cdc24 -----KYSIAASQMNVMQDETQLRFLPGLNLLNFQRKFLIKLESTIAELSPNDQSWG 283  
 Yl-Cdc24 -----YQNRLLAEAILNPDTHLMLFNVSALVDFQRRVVGIEHVCCLPVEEQRFQ 343  
 Pg-Cdc24 -----YQRALLQREILPSDQIRALFINLDSLVDQRRFLIGVEANARLPDEQRFQ 331  
 Ca-Cdc24 -----YRQDLIEAENLSSEQIHLLFPNLNEIIDFQRRFLNGLECNINVPRIYQRIG 352  
 Sc-Cdc24 -----YRQQLLDSNLTSEELYMLFPNLGDAIDFQRRFLISLEINALVEPSKQRIG 353

\* \* \* \* \*

Mg-Cdc24 SPFVAMEASFDPITYPFIANQRKAALIAQSEFDKIKSIE----HPVACDFNTLDGFLLK 448  
 Fg-Cdc24 APFVHYEDALIDIYQPFIANQRKAAQVANQVFDKIQRSS----HPVAADYNTLDGFLLK 332  
 An-Cdc24 ELFIQHEEAFR-QYEPFIANQMRCDKTCQKEWDKIQAAPRSPDLQMQVAQPATLNGFFVK 312  
 Sp-Cdc24 ALFIALEEGFS-VYQVFCNFPNAQQLIIDNQQLLKVA-----NLLEPSYELPALLIK 356  
 Pb-Cdc24 LLFVQTEDAFI-VYEPYCSNYAAQDLVKEKAELQKLD-----HVLSPHQLLSMLIK 319  
 Cc-Cdc24 QHFVDCDEFEA-VYEPYCSNFTNATELLVANEQNLAALN-----GFISVS-ELKAFHIT 346  
 Lb-Cdc24 QHFLESEDEFV-VYEPYCANYNATELMLANEESLVPLN-----HLINVKGELPAFLIK 361  
 Pp-Cdc24 VPFMENEFEA-VYEPYCALYTSASDMLQEMQNLTALD-----NVLSKS-ELPAFLIK 335  
 Yl-Cdc24 ALFLNMEAGFH-IYEPYALNQKASSDLAVQEAPKLTALA-----HIIEPTYELQAFLIK 396  
 Pg-Cdc24 HLFHSFEDSFS-CYEPFCANFASASQLAQDENAAALTLQV----- 370  
 Ca-Cdc24 SVFIHASLGPFNAYEPWTIGQLTADLINKEAANLKKSS-----SLLDPGFELQSYILK 406  
 Sc-Cdc24 ALFMHSHKHFVK-LYEPWSIGNAAI EFLSSTLHKMRVDESQ---RFIINNKLLELQSFYK 409

\* \*

Mg-Cdc24 PMQRLVKYPLLLKDLLK-----KSEDDKVKDDL SLGIAAAERTLQKANEAVDRD 497  
 Fg-Cdc24 PMQRLVKYPLLLKDLNK-----KTEDDEVKMDLTTGCEAAERVL SKANEAVNRD 381  
 An-Cdc24 PFQRLTKYPLMLSELRK-----QIEDPDLQADISRAIDSIQSVLDAANDAIDKE 361  
 Sp-Cdc24 PIQRICKYPLLLNQLLK-----GTPSGYQYEEELKQGMACVVRVANQVNETRRRIH 406  
 Pb-Cdc24 PIQRICKYPLLMSSLLK-----STNPSWQSYPQLIQGSEAIRRVAEKVNETQRKQ 369  
 Cc-Cdc24 PIQRVCKYPLFFGDLIKV-----ATGDDTYPHLEGLKQGAEAAHRI TAKINEAHRRRA 398  
 Lb-Cdc24 PIQRVCKYPLLLD-----ASSPTYQHFDLKRGSDAAKRITDKINEAQRRRA 408  
 Pp-Cdc24 PVQRI CKYPLLESLLK-----AVKTTDYPFIEELKLGVA AAKRVTDKINEAQRRRA 386  
 Yl-Cdc24 PIQRICKYPLLLRELVK-----VSSSDHPYASELLDGL EAIKRVTNSVNETQRRV 446  
 Pg-Cdc24 -----HTSPNGAYYDELKEGLASITRVTDVAVNETTRQR 403  
 Ca-Cdc24 PIQRLCKYPLLLKELIKTSPEYSKQDPHGSSSSTSFNELLVAKTAMKELANQVNEAQRRRA 466  
 Sc-Cdc24 PVQRLCRYPLLVKELLAE-----SSDDNNTKELEAALDISKNIARSINENQRRT 458

\*

Mg-Cdc24 LLDDALEDLKTRVDDWKNHQVDQFGSLLLHGVTVL TG--KSESERDYEIYLFECILLCC 555  
 Fg-Cdc24 LLDEAVEDLTSRVEDWKS HKVEQFGKLL LHGVYVITG--KTDQEKDYEIYLFESILLCC 439  
 An-Cdc24 QLAAAFVELDERVDDWKALKIETF GELLRFGTFTVIKNDNNKDSEREYHIYLFERILLCC 421  
 Sp-Cdc24 ENRNAIIELEQRVIDWKYSLQYFGQLLVVDVNVCKA----DIEREYHVFLFEKILLCC 462  
 Pb-Cdc24 ENLQLVQDLKRRMDDWK GPPIDSHGALLQEKLMVTVN----DLDREHLILLFEKAILIC 425  
 Cc-Cdc24 DNEQIVKSLAKRITDWKGHHLENFGELLLEDVVFVTKS----DIDREYHVFLFEKILLCC 454  
 Lb-Cdc24 ENEQTVKSLHYRIDDWKGHHLENFGELLLEDVVFVTKS----DIDREYHVFLFEKILLCC 464

Pp-Cdc24 ENLATVEALKGRVEDWKGHHISQFGSLLDDIFTVTKS---EVDREYHVFLFEKIILCC 442  
 Yl-Cdc24 ENVAIIQDLKERIDSWKSYNLEDFGDLLYMDHLTIKAE----SGEYEVLYVLFDAIILCC 502  
 Pg-Cdc24 ENELAVNDLKERVEDWKGHELVTFGQLVLEDFTFVVKN----ESEREYHVYLFERIILCC 459  
 Ca-Cdc24 ENIEHLEKLERVGNWRGFNLDAQGELLFHGQVGVKDA----ENEKEYVAYLFEKIVFFF 522  
 Sc-Cdc24 ENHQVVKKLYGRVNVWKGYRISKFGELLYFDKVFISTTNSSEPEREFEVYLFKIIILF 518  
 \* \* \* \* \* \*\*

Mg-Cdc24 KEISSTKSKDKKDKTKS-----TGPKIRNKGAKLQLKGRIFMT 593  
 Fg-Cdc24 KEISSSKSKDKKDKLRS-----GGPKARNKSAKLQLKGRIFMT 477  
 An-Cdc24 KDINPNKQKSRLVGGSK-----DKPNTSKGKPRVLKGRIFYMA 459  
 Sp-Cdc24 KEMS-TLKRQARSISMN-----KKTKRLDSLQLKGRILTS 496  
 Pb-Cdc24 KELKEGSKNRLTKTNTI-----MKKKRRASIQAAGTISVN 460  
 Cc-Cdc24 KEALQQPPNPGRGKNAKNSILKKQ--P----APLPLATGGQSIAGRDTPLLKGRIFLG 507  
 Lb-Cdc24 KEAPLLPQNGRNKVGKNSILKKQGTP----PPLTLPGGVGPQKKTTPLLKGRIFLG 519  
 Pp-Cdc24 KEYLVPSANGR-KVGKSNSILKKPPVP----PPLMLP-GAGPSKKRNTPLLLKGRIFLA 495  
 Yl-Cdc24 KETRDKKGKTMSPSKK-----PQKTVLSLKGRIYIA 534  
 Pg-Cdc24 KEVGVKLDKASKQMSLKKNSQIN-----NSNVNGGKRKNTQQLKGRIFIA 506  
 Ca-Cdc24 TEIDNKKSDKQEKSKFSTRKRSTSSNLSSSTTNLLESINNSRKDNTLPLELKGRIYIS 582  
 Sc-Cdc24 SEVVTKKSASSLILKK-----SSTSASISASNITDNGSPHH 556

Mg-Cdc24 NVTEVLSFAKPGS-----YTVQIWWKGDGP-VEFIIKFKQNEE 630  
 Fg-Cdc24 NVTDIVSFTKPGS-----HSVQIWWKGDGP-VEFIIKFLNEE 514  
 An-Cdc24 NVTDIVLQKPGS-----YRIQIFWKGDGPVVDNFIIRYQNEE 497  
 Sp-Cdc24 NITTVVPHHMGs-----YAIQIFWRGDPQ-HESFILKLRNEE 533  
 Pb-Cdc24 RITHILN-KSTAS-----GGKYYSSNSNS-VQQFTLKRNEE 496  
 Cc-Cdc24 NVTQALSVPARAST-----ASGIPAHFPLQVWKGDDD-LEFFTLRCKRED 552  
 Lb-Cdc24 NVTQAVPVSARIST-----PSGVPPHFPLAVWKGDDD-LEFFTLRCRNEE 564  
 Pp-Cdc24 NVHLAEPKIS-----AGQYSLAVYWRGDDD-TEFFTLRCRNEE 532  
 Yl-Cdc24 NVTNMSSTENG-----YSLTLTYKGDGY--GSMTMFRHEE 569  
 Pg-Cdc24 NVMSATPRPVPPEEQKKWQAAITKAVDDAVERRRRQVHLLSSGSRKMSPLSQFPNTP 566  
 Ca-Cdc24 EIYNISAPNTPGS-----TLIISWGRKE-SGSFTLRYRSEE 618  
 Sc-Cdc24 SYHKRHSNSSSN-----NIHLSSSAAAIHSSSTSSDNNS 593

Mg-Cdc24 MMKKAAGLDQQRKASG-SQSATS-----PDQPTAEFAWMRSQSA-VEFIIKFKQNEE 682  
 Fg-Cdc24 TLKKWVNTLETQRKHNV-PRQSTN-----SDTLSTDFAWTRDQVAGLENPYLKENDDED 567  
 An-Cdc24 TMRKWKDINTQREIQAEQRSARN-----TGTSDEFTYMKLSLN-IPNPYQQEYDVEE 550  
 Sp-Cdc24 SHKLWMSVLNRLWKNEHGSFKDI-----RSAASTPANPVYNRSSSQTSKGYNSSD 584  
 Pb-Cdc24 QLKQWEAVIDKTRMNIQS-----TSSSTPLLPSPQSTS-----530  
 Cc-Cdc24 QMRQWESTINRLIKEAAQRASER----PHGP-ISRVAHHSPIVRVPPTDP-HSHFSSQ 605  
 Lb-Cdc24 QMRQWEAQINRLIKEAAQRKASDR----PTMSGIARIAMTNSINPSSASRFGNSSTYSN 619  
 Pp-Cdc24 QLKMWETQLNRLIQENINRRMSDRNPQRLTQMTPSAAAMQQRPPVAVNQEKTYSTFSQ 592  
 Yl-Cdc24 QLRQWDATIKQLHDWYNQDSYESH-----FSPLVESPISSRNSQSSHLSLEDL 618  
 Pg-Cdc24 QSEMGPSPNSASYQHHPVSHPPRIP---EHPYAHSGHGNGGGSISSRTFEDEEESYQTD 623  
 Ca-Cdc24 ARNQWEKCLRDLKTNEMNKQIHKKLRDSDSSFNDDSAIYDYTGISTSPVNQSTQQQYYD 678  
 Sc-Cdc24 NNSSSSLFKLSANEPKLDLRGRIMIMNLNQIIPQNNRSLNITWESIKEQGNFLKFKNE 653

Mg-Cdc24 EE-YEFGAIPQSQYQAMAGTMRMNSTASIRGRSQTGESSQSIASIRGPPPRFPLPQ 741  
 Fg-Cdc24 DEDIGPATAPAGFPVTHPMSLGPRTASSNNLRARAGTGESSASLAGMVRAPPPRFLPA 627  
 An-Cdc24 QS-TKEAAFFSEFP-----MSRNASSTSLRTRSATGGSGSGPPLSTSRP-RYP-AM 599  
 Sp-Cdc24 YDLRTHSLDENVSPTSISPPSSKSPFTKTTSKDKTSAT-----625  
 Pb-Cdc24 -----DKTSFIDSLDDD-----542  
 Cc-Cdc24 GSVVSSAYSS-QASSAVSARSSSRSTAPYHYESSHTSYSS---SGPQGYPPHEGFDRD- 660  
 Lb-Cdc24 GAPVSIHHQPS-ISSSIRSNRPVN-SYNHDDASSNAGSMYS---AGPQGYPPHDFDFEP 674  
 Pp-Cdc24 STVVSAYGATSPYGAPGRMGRHPYAAAGDEPPASANGSYNGFGHGQGYPPHDFDFVD- 651  
 Yl-Cdc24 RLTLGNRSLSGVPKLGPRQHSSTINGMHGANGMNHSSVS-----659  
 Pg-Cdc24 ESSVNGRNTPSGSRRTTGHRSMPAERSEASFGPGRARAQTDDAASANLAQWRNQMPNSAI 683  
 Ca-Cdc24 HRGSHSRHHSSSTLSMMKNRVKSGDLSRISSTSTLDS-----719  
 Sc-Cdc24 ETRDNWSSCLQLIHDLKNEQFKARHHSSTSTSTAKSSS-----MMSPT 699

Mg-Cdc24 PPQPLSVQTLQGG-NSPGFRPGDSYFSPIGESPSSRTSTASNVFPGSAGYGSFKGVGTG 800

Fg-Cdc24 PPGSLSLQTQPNGA-HSPSAWAGDSYFSPVTEPASTRTSTSTSGMFS-TPQYGFPKSAT- 684  
 An-Cdc24 PDSTLSVHTQFPGGSMSPGERNGNSYFSPT----ESARSSSQS-----AGYPYNRQVT- 648  
 Sp-Cdc24 TTDERPSDFIRLNSE---ESVGTSSLRT-----SQTSTIVSNDSSSTASIPSQISR 674  
 Pb-Cdc24 DDESTKFFIRPIAS---SSRLELAN-----IPLSLLSSTSTSTSTSTSSASS- 590  
 Cc-Cdc24 DEEDDLEDYPPASTS---YSGRGTPMGN-----RRPTALSMPGERSESLHGYERPRAQTE 712  
 Lb-Cdc24 EDEEDYEDYPPVSAANYPASGRGTPMGGPPGARRNPALSMPLEP-EPVAGYDRPRAQTE 733  
 Pp-Cdc24 -LDEDEYEEYPLPNYP---PSGRATPAGS-----RRSDMIGFSQSARTSSHSS-IPSAMSS 701  
 Yl-Cdc24 IASSNGGMSRARSASTPGFDDGSMRPS----- 687  
 Pg-Cdc24 PPVPRSGQLTPASSDAYLPNLSRSTSSKPLRHQPSHEWGAGTINGSNFYRVDDRSHLPT 743  
 Ca-Cdc24 -FSNNLNGSPNTTNPMLSSDATKIPT----- 746  
 Sc-Cdc24 TTMNTPNHHNSRQTHDSMASFSSSHMKRVSDVLPKRRTTSSSEFESEIKSISENFKNSIPE 759

Mg-Cdc24 QPYPGMWDGPIVDQNRYTAPAMPRAPSRDGPSPVNAYGMSGANGRNPRGSPMPVMASHA 860  
 Fg-Cdc24 -PNPQQWED---ANGNRYTAPAMPRAPSRDGPSPN-----PARNPRGSPSLPAMSSSQ 733  
 An-Cdc24 --PVTWGD---DNNRYTAPALSRATSRDGSNSGYFNG-APPNGRSAQRPSLPMSGSNQ 702  
 Sp-Cdc24 ISQVNSLLNDYNYNRQSHITR----- 695  
 Pb-Cdc24 -----  
 Cc-Cdc24 SNDGPTIAQWRNNVAGPRA----- 731  
 Lb-Cdc24 STDGLTMAQWRNGLPQPPSNQPSAGALRPITPRMNSNVANSYTSASFGNSSVPLPLK 793  
 Pp-Cdc24 HT---SLYPGRPISRSAMS-----YNVETDSASS-----S 729  
 Yl-Cdc24 -----  
 Pg-Cdc24 SGPSGHPLHARHNEPQLLPSNSTGVPMFRSRSASSPNIHQSPDFSQQWNSGLLNVPVSPV 803  
 Ca-Cdc24 -----  
 Sc-Cdc24 -----

Mg-Cdc24 QGASQQRSRSYSTPDIQQGQPPGMRRTPGGSQSNVPAVPGIPAHLHAAHERH----- 913  
 Fg-Cdc24 AALAAQQRNRSYSTPDING---PGMPRTRQPSHGNIAPVPGIPQHLHPGHN----- 781  
 An-Cdc24 SSNSASQMRMSASSPDIHHHNPESTRYMGVHTMQTVDNVPPPIPAHMANMK----- 754  
 Sp-Cdc24 -----  
 Pb-Cdc24 -----  
 Cc-Cdc24 -----  
 Lb-Cdc24 SSSRPVLRQASSNRLKNGYDASYNIGIPTAVNSSDYRTVRAPTPTGGLTAP----- 846  
 Pp-Cdc24 TTTRSALRSQFSSTRKLGAYDQAESR-----PNASSRQSAPAAP----- 768  
 Yl-Cdc24 -----  
 Pg-Cdc24 SLPSGSHSSSSTRPALPLHNQVQIGGHKQRSSDSSAAALDRSSTESQRLSGGVGGGN 863  
 Ca-Cdc24 -----  
 Sc-Cdc24 -----

Mg-Cdc24 -----DSNIPRSNTGSPALSLRNDLPMRSNTQSPGVQRDRMLQQGGGYSGGTLAQF 964  
 Fg-Cdc24 -----PNLSRDQGTGSP---RNDQPTRAQTNSPGAQRERMHKPTG-SVGGSMNHF 826  
 An-Cdc24 -----APVNRSQNNSP---TNQSLPIRTNTS-----HAFHEPQYSDGRAAAPL 794  
 Sp-Cdc24 -----VYSGTDDGSSVSIFFEDTSSS 715  
 Pb-Cdc24 -----  
 Cc-Cdc24 -----  
 Lb-Cdc24 -----LMNRSRSASQPTAYVPKTAVPPPMPSPSYNS--HWSTHRSNHLN--NNKRGS 894  
 Pp-Cdc24 -----SRSRSASQPTAYIPPTVPPLPTSIPSSVQWSTRAQSTVGNHGNKRGS 817  
 Yl-Cdc24 -----  
 Pg-Cdc24 GVGGRSNLPLSNPMAQTAHGGPPAGGGGLNPRYSQQAGLTGHSAASSLITRSGSLVV 923  
 Ca-Cdc24 -----  
 Sc-Cdc24 -----

Mg-Cdc24 PMQPVYPRGGTPNPPGSGHTPAPLNLSADMGRTVSPPLGTGTPQPNTAGLMSPDQGGGI 1024  
 Fg-Cdc24 PAQPVHPRSITP---GGGNQILRVDAANAASRTVSPALGTATMPPP-SANPLSPEIP--- 879  
 An-Cdc24 SDQPTSPLSHEP-----EEEP-----F 811  
 Sp-Cdc24 TKQKIFDQPTTNDCDVMRPRQYSYSAGMKSDGSLLPSTKHTSLSSS----STSTLSVR 770  
 Pb-Cdc24 -----GSSYFPPSLLSPVTLT-----GSQD----- 610  
 Cc-Cdc24 -----  
 Lb-Cdc24 SSQSTGDSSEYSPNSS-SPVTPFGSSESLGGV-AIRNSRTQPYES-----APALNGH-- 945  
 Pp-Cdc24 SSESTGESSDYSPHSSGSPITPFGSSDTSLAGMASRHSRSQQHVD-----QVVTSAANE 872  
 Yl-Cdc24 -----

|          |                                                                                                                                                                                                              |      |
|----------|--------------------------------------------------------------------------------------------------------------------------------------------------------------------------------------------------------------|------|
| Pg-Cdc24 | VQGGSEGVGGSRYGAADQLVGGSHPSKPLGGGGSSSTSSTMKSSLTATHNPNNNNNNNN                                                                                                                                                  | 983  |
| Ca-Cdc24 | -----                                                                                                                                                                                                        |      |
| Sc-Cdc24 | -----                                                                                                                                                                                                        |      |
|          | PBI domain                                                                                                                                                                                                   |      |
| Mg-Cdc24 | MPTQLK <b>V</b> KVNYDT-----SNYMTLVAAYNITYRSLVDRIDAKLARFTNSSISRG-NLR                                                                                                                                          | 1076 |
| Fg-Cdc24 | LPTQLK <b>V</b> RVNCES-----GNYVTLVAFNITYQSLVDRIDAKLARFTSSISKS-MLK                                                                                                                                            | 931  |
| An-Cdc24 | MPTQLK <b>A</b> KVNF-----ENYVTLVISSNIGFRTLDRVDAKLARFTNRSIGSK-TVR                                                                                                                                             | 862  |
| Sp-Cdc24 | NTTN <b>V</b> K <b>I</b> RRLRH-----EVSLVLVAHDITFDELLAKVEH <b>K</b> IKLCGILKQAVPFRVR                                                                                                                          | 822  |
| Pb-Cdc24 | --TL <b>V</b> K <b>L</b> TYN-----EGVYCVTPHQIKFSDLMERVE <b>K</b> IKIVANLKPNA--VLR                                                                                                                             | 657  |
| Cc-Cdc24 | -----                                                                                                                                                                                                        |      |
| Lb-Cdc24 | --HN <b>V</b> K <b>V</b> VHFH-----EDIFVIQVSRAEYEDLVEK <b>V</b> G <b>R</b> KIRLCGP-RRDDG-PLR                                                                                                                  | 993  |
| Pp-Cdc24 | LSRPV <b>K</b> V <b>V</b> HFH-----EDIFVIQVPRSTEFDQLVEK <b>V</b> G <b>K</b> KIRLCGPNRRDDG-PLR                                                                                                                 | 923  |
| Yl-Cdc24 | --NI <b>K</b> V <b>R</b> VQYF-----QDVFTLIVPAKVTYDQLIERVER <b>K</b> VRLCGKVVPA--LR                                                                                                                            | 733  |
| Pg-Cdc24 | GPTSIR <b>F</b> K <b>L</b> RAG-----EDTYVIVTSLTITYHELIE <b>K</b> I <b>V</b> K <b>L</b> RNCGVYKSSA-RLK                                                                                                         | 1034 |
| Ca-Cdc24 | --FDVA <b>I</b> K <b>L</b> LYKST-----ELSEPLVNAQIEYNDLLQ <b>K</b> I <b>S</b> Q <b>I</b> IITSNLVADDVN-ISR                                                                                                      | 797  |
| Sc-Cdc24 | --SS <b>L</b> FR <b>I</b> SYNNNSNNTSSSEIFTLLVEK <b>V</b> VNFDDLMA <b>I</b> NS <b>K</b> ISNTHNNNISP--ITK                                                                                                      | 815  |
|          | -----                                                                                                                                                                                                        |      |
| Mg-Cdc24 | LRY <b>R</b> DE <b>S</b> DFVSI <b>V</b> CDE <b>D</b> VQMAFTDGRNGDRDMYN-GG <b>V</b> GE <b>V</b> ELFC <b>V</b> GIGGE                                                                                           | 1127 |
| Fg-Cdc24 | LRY <b>R</b> DE <b>D</b> GDYVAIEGDD <b>D</b> IQIAFMEWREGVRN <b>M</b> YS-GG <b>V</b> GE <b>I</b> ELFC <b>V</b> GD <b>T</b> A-                                                                                 | 981  |
| An-Cdc24 | LRY <b>Q</b> DE <b>D</b> GD <b>F</b> IT <b>S</b> DE <b>A</b> VQLAFV <b>E</b> W <b>Q</b> HREELARG <b>V</b> GE <b>I</b> QL <b>F</b> C <b>Q</b> P <b>I</b> EN-                                                  | 913  |
| Sp-Cdc24 | LKY <b>V</b> DE <b>D</b> GD <b>F</b> IT <b>I</b> TSDE <b>D</b> VLMA <b>F</b> ET <b>C</b> T <b>F</b> ELMD <b>P</b> V <b>H</b> NG <b>M</b> D <b>T</b> VS <b>L</b> H <b>V</b> V <b>V</b> Y <b>F</b> --          | 872  |
| Pb-Cdc24 | LKY <b>R</b> DE <b>D</b> GD <b>H</b> IT <b>I</b> SSD <b>D</b> VQMA <b>F</b> E-----SR <b>Q</b> NT <b>V</b> N <b>L</b> F <b>V</b> T <b>L</b> ----                                                              | 694  |
| Cc-Cdc24 | -----                                                                                                                                                                                                        |      |
| Lb-Cdc24 | V <b>K</b> Y <b>K</b> DE <b>D</b> GD <b>M</b> VS <b>L</b> GS <b>T</b> ED <b>V</b> QMA <b>F</b> E-----Q <b>G</b> G <b>Q</b> V <b>T</b> L <b>F</b> V <b>T</b> -----                                            | 1027 |
| Pp-Cdc24 | V <b>K</b> Y <b>K</b> DE <b>D</b> GD <b>L</b> V <b>S</b> LGS <b>T</b> ED <b>V</b> QMA <b>F</b> ES-----FR <b>P</b> GN <b>L</b> V <b>T</b> L <b>V</b> Y <b>Q</b> -----                                         | 960  |
| Yl-Cdc24 | I <b>K</b> Y <b>Q</b> DE <b>D</b> GD <b>M</b> V <b>T</b> I <b>H</b> SDE <b>D</b> I <b>A</b> MA <b>L</b> E <b>Q</b> -----KN <b>L</b> E <b>Q</b> L <b>N</b> I <b>W</b> V <b>A</b> -----                        | 769  |
| Pg-Cdc24 | I <b>R</b> Y <b>E</b> DE <b>E</b> GD <b>L</b> IL <b>I</b> C <b>N</b> DE <b>D</b> V <b>S</b> MA <b>L</b> E <b>W</b> M <b>R</b> -----S <b>V</b> G <b>I</b> S <b>H</b> LL <b>L</b> L <b>F</b> V <b>D</b> -----  | 1073 |
| Ca-Cdc24 | LRY <b>K</b> DE <b>D</b> GD <b>F</b> V <b>N</b> LS <b>D</b> DD <b>W</b> GL <b>V</b> LD <b>M</b> L <b>T</b> SE <b>D</b> F <b>Y</b> Q <b>T</b> SS <b>N</b> E <b>K</b> RS <b>V</b> T <b>V</b> W <b>V</b> S----- | 844  |
| Sc-Cdc24 | I <b>K</b> Y <b>Q</b> DE <b>D</b> GD <b>F</b> V <b>V</b> LGS <b>D</b> ED <b>W</b> N <b>V</b> A <b>K</b> E <b>L</b> A <b>E</b> -----N <b>N</b> E <b>K</b> F <b>L</b> N <b>I</b> R <b>L</b> Y-----             | 854  |

### Alignment of fungal CBSn-PBI proteins

|                      |                                                                                                                                                                                                                             |     |
|----------------------|-----------------------------------------------------------------------------------------------------------------------------------------------------------------------------------------------------------------------------|-----|
| Mg-CBSn-PBI          | -----                                                                                                                                                                                                                       |     |
| Fg-CBSn-PBI          | -----MSGSHNTHRSTPNKGRGAVPFANSPSGGGGGSSNIPRPVLEP-----                                                                                                                                                                        | 44  |
| An-CBSn-PBI          | -----MS--STPTFRGTTSHR--TVGRGLPDFEGGSSASHIPRPRPESSTITSHNP                                                                                                                                                                    | 49  |
| Yl-CBSn-PBI          | -----MSRNTPSRFSNYSGTSQTSP-----                                                                                                                                                                                              | 21  |
| Ca-CBSn-PBI          | -----                                                                                                                                                                                                                       |     |
| Sp-CBSn-PBI          | -----MTVGTLVVSSSTASDT-----                                                                                                                                                                                                  | 16  |
| Cc-CBSn-PBI          | -----                                                                                                                                                                                                                       |     |
| Lb-CBSn-PBI          | -----                                                                                                                                                                                                                       |     |
| Pp-CBSn-PBI          | -----                                                                                                                                                                                                                       |     |
| Pg-CBSn-PBI          | MSRIPLPIQVNSTTPTQH <b>Q</b> H <b>Q</b> H <b>Q</b> H <b>Q</b> HSPNSLMTSSQRSANRSGLPRPN <b>S</b> IYSDDPAL <b>T</b> S                                                                                                           | 60  |
| Pb-CBSn-PBI <b>A</b> | -----MLPKPSRS                                                                                                                                                                                                               | 8   |
| Pb-CBSn-PBI <b>B</b> | -----                                                                                                                                                                                                                       |     |
| Bd-CBSn-PBI          | -----                                                                                                                                                                                                                       |     |
|                      | -----                                                                                                                                                                                                                       |     |
| Mg-CBSn-PBI          | -----MSAS--RQKQTKRDEAIRK <b>M</b> ENDLAK <b>K</b> HH-----VTGRAR <b>H</b> S                                                                                                                                                  | 36  |
| Fg-CBSn-PBI          | -TPPAETG-SSFSAS--RQKQSKRDEAIRK <b>K</b> LENDLS <b>K</b> KKH-----LTSRAR <b>H</b> S                                                                                                                                           | 89  |
| An-CBSn-PBI          | HTPSSD <b>I</b> GSST <b>M</b> SAASSR <b>Q</b> R <b>Q</b> N <b>Q</b> SKRDEAIRK <b>K</b> LEADLN <b>K</b> KRS-----NPARAN <b>R</b> T                                                                                            | 100 |
| Yl-CBSn-PBI          | -----IDSL <b>T</b> ES--RKRQSK <b>K</b> DEAIRK <b>L</b> ETDLS <b>K</b> RSH-----VRPK <b>P</b> --T                                                                                                                             | 58  |
| Ca-CBSn-PBI          | -----MAP <b>P</b> TS <b>L</b> DS--RQRQSKR <b>D</b> AIRK <b>K</b> IEN <b>D</b> L <b>R</b> KK <b>A</b> -----STSL <b>S</b> TRR                                                                                                 | 41  |
| Sp-CBSn-PBI          | -----ASH <b>V</b> SD <b>T</b> --RKRQ <b>Y</b> QR <b>D</b> EAL <b>R</b> KK <b>I</b> ISE <b>L</b> G <b>K</b> K <b>S</b> GN <b>F</b> -----ESPVR <b>K</b> IR                                                                    | 57  |
| Cc-CBSn-PBI          | -----M <b>S</b> T <b>V</b> SG <b>S</b> MS <b>H</b> SE <b>T</b> R <b>K</b> T <b>N</b> RR <b>D</b> EAIRK <b>K</b> IE <b>S</b> EL <b>A</b> RR--T <b>I</b> ST <b>H</b> Q <b>P</b> PP <b>S</b> RR <b>R</b> G <b>K</b>            | 53  |
| Lb-CBSn-PBI          | -----M <b>S</b> SL <b>S</b> --F <b>Q</b> SD <b>P</b> RR <b>K</b> Q <b>S</b> KR <b>D</b> EAIRK <b>K</b> IE <b>S</b> EL <b>S</b> RR <b>K</b> --T <b>I</b> ST <b>T</b> Q <b>Q</b> RS <b>K</b> R <b>G</b> --V <b>K</b>          | 49  |
| Pp-CBSn-PBI          | -----M <b>S</b> T <b>V</b> S--A <b>S</b> VA <b>E</b> TR <b>K</b> K <b>Q</b> TKR <b>D</b> EAIRK <b>K</b> IE <b>G</b> EL <b>S</b> RR <b>K</b> --T <b>I</b> ST <b>T</b> Q <b>T</b> SS <b>R</b> R <b>G</b> -- <b>H</b> <b>K</b> | 49  |
| Pg-CBSn-PBI          | STSPSS <b>H</b> RNT <b>S</b> F <b>Q</b> SS <b>L</b> SE <b>T</b> R <b>Q</b> R <b>Q</b> R <b>K</b> DEAIRK <b>K</b> IE <b>N</b> L <b>Q</b> R <b>K</b> RP <b>G</b> Q <b>K</b> RT <b>N</b> NP <b>A</b> GSS <b>G</b> G <b>P</b> R | 120 |
| Pb-CBSn-PBI <b>A</b> | RL <b>P</b> A <b>I</b> ATA <b>R</b> A <b>E</b> TP <b>D</b> V <b>A</b> NN <b>R</b> Q <b>R</b> Q <b>T</b> K <b>D</b> EAIRK <b>K</b> LE <b>Q</b> EL <b>S</b> KK <b>R</b> -----TG <b>T</b> TR <b>V</b> R-- <b>Q</b>             | 58  |

|              |                                                                 |     |
|--------------|-----------------------------------------------------------------|-----|
| Pb-CBSn-PB1B | -----ALRKKLENELSKKR-----GGSRLRKH                                | 23  |
| Bd-CBSn-PB1  | -----MKRNSASSASGQK-----HDT                                      | 16  |
| Mg-CBSn-PB1  | RKAPPGTVLALKPSQALQIKPGTTVAEAAQLMAAKREDCVLVTDDEDRAGIFTAKDLAF     | 96  |
| Fg-CBSn-PB1  | RKAPPGTVLALKPSQALQIKPNTTVSEAAQLMAAKREDCVLVTDDEDRAGIFTAKDLAF     | 149 |
| An-CBSn-PB1  | RKAPPGTVLALKPSALQIKPSTTIAEAAQLMAAKREDCVLVTDDEDRAGIFTAKDLAF      | 160 |
| Yl-CBSn-PB1  | KKIVSGTVMALKPSPAVTIKPKTSVSEAAQLMSAKRENCVLVIEDDN-ISGIFTAKDLAF    | 117 |
| Ca-CBSn-PB1  | SRGAPGTVLWLKPGPEPIICKPTATVVEVAQLMTARRENCVLVVEIEGELLGIFTAKDVAF   | 101 |
| Sp-CBSn-PB1  | RNGEPGTVDSAADLPAALTVHMQLVTEAQLMAAKRQNCVLVDDDEQLAGIVTATDIAT      | 117 |
| Cc-CBSn-PB1  | NAPTKGTVAALKPSPALTVPENITVAEASQLCAAKRTDCVLVVDDEEGLSGIFTAKDLAY    | 113 |
| Lb-CBSn-PB1  | ATPAKGTVAALKPSPALTVPENITVAEASQLCAAKRTDCVLVVDDEEGLSGIFTAKDLAY    | 109 |
| Pp-CBSn-PB1  | PNVQKGTVAALKPSPALTVPENITVSEASQLCAAKRTDCVLVVDDEEGLSGIFTAKDLAY    | 109 |
| Pg-CBSn-PB1  | PKRQAGTVSALRPLPALTVPNIIVADASQLCAAKRTDCVLVVDDEHLGIFTAKDLAF       | 180 |
| Pb-CBSn-PB1A | TRKIAGTVSALRPAQALTVKENMLVIEASQLMAAKRSDCVLVVDEDDHLSGIFTAKDLAY    | 118 |
| Pb-CBSn-PB1B | AQRVAGTVSALRPAQALTVKENMLVMEAAQLLAAKRDCVLVVDDEDDHLSGIFTAKDIAY    | 83  |
| Bd-CBSn-PB1  | RRTRVGTVSSLRPAPII I IETARI I QAAQLMAAKRTDAVLVVGEDGALAGILTDKDIAY | 76  |
|              | *** ** * * ** * * * *                                           |     |
| Mg-CBSn-PB1  | RVVGAGLKATNVTIAEIMTKNPLCARTDTSATDALDLMVRKGRHLPVMDE-----         | 147 |
| Fg-CBSn-PB1  | RVVGAGAKASAVTIAEIMTKNPLCARTDTSATDALDLMVRKGRHLPVMDE-----         | 200 |
| An-CBSn-PB1  | RVVGAGLKARDITVSEIMTKNPLCARTDTSATDALDLMVRKGRHLPVMDE-----         | 211 |
| Yl-CBSn-PB1  | KVVGSLDASVTTVDQIMTRNPLYATTNTSATEGLNLMVNKGRHLPVMDE-----          | 168 |
| Ca-CBSn-PB1  | RIVGSLNATQVTIDTMTKNPICANAADPAGDALNLMVERGFRHLPVLDE-----          | 152 |
| Sp-CBSn-PB1  | RCVGAGLNARQTLIADIMSTSPLCITSDTRFDDALLMIEHKFRHLPVVSDDGGPDGSAGD    | 177 |
| Cc-CBSn-PB1  | RVTAEGLDPHSTPVAQIMTRNPMVTRDTSATEALQLMVSRHRHLPVCNEDG-----        | 166 |
| Lb-CBSn-PB1  | RVTAEGLDPHSTPVSQIMTRNPMVTRDTSATEALQLMVSRHRHLPVCNEDG-----        | 162 |
| Pp-CBSn-PB1  | RVTAEGLDPHVTQVSTIMTRNPMVTRDTSATEALQLMVQRHRHLPVCNEEG-----        | 162 |
| Pg-CBSn-PB1  | RVIGDGMPPRTTPVSAIMTRNPMVTRDTSATEALTMTVTRGRHLPVCNDEG-----        | 233 |
| Pb-CBSn-PB1A | RVVAESLDARHTPVSQIMTPGMCVTADTSATDALNLMVTRGRHLPVCNEEG-----        | 171 |
| Pb-CBSn-PB1B | RVVAEELDASHTTVATIMTRGPMCVTSDTSATDALNLMVTRGRHLPVCNEEG-----       | 136 |
| Bd-CBSn-PB1  | RVVAEGLDIRTPVSSVMTRDPIAVYDKGSRNEALNIMVSRFRHLPVIVSETGGGNDDDD     | 136 |
|              | * * * * *                                                       |     |
| Mg-CBSn-PB1  | -----NQDISGILDITKCFYDAMEKLERAYSSSRKLYDALEGVQSELGA-----          | 191 |
| Fg-CBSn-PB1  | -----NQDISGVLDTKCFYDAMEKLERAYSSSRKLYDALEGVQSELGS-----           | 244 |
| An-CBSn-PB1  | -----NQDISGVLDTKCFYDAMEKLERAYSSSRKLYDALEGVQSELGS-----           | 255 |
| Yl-CBSn-PB1  | -----NNEVSGILDITKCYHEAMEKLERAYQSSRKLDALEGVQTELGS-----           | 212 |
| Ca-CBSn-PB1  | -----KSQIVGVLDITKSYAQQMEKLERMHSSSKLHEALDSVHNEIGVG-----          | 197 |
| Sp-CBSn-PB1  | -----EGDVIGIINMRACLREPLNRIARQQEAAQKLVLEAEGAQEEIENKSVSGNTN       | 229 |
| Cc-CBSn-PB1  | -----NVVGLLDITKVFHEALGKVERSSAASEQLFNAMAGVQSELGG-----            | 208 |
| Lb-CBSn-PB1  | -----NVVGLLDITKVFHEALGKVERSSAASEQLFAMAGVQSELGGA-----            | 205 |
| Pp-CBSn-PB1  | -----NVVGLLDITKVFHEALDKVERSSASEKLYSALAGVQSELGTG-----            | 205 |
| Pg-CBSn-PB1  | -----DVIGLLDITKVFHEALEKLERAYGSSQKLYNAIEGVQSEFGSGG-----          | 277 |
| Pb-CBSn-PB1A | -----DIFGLLDITKCLYEALDKMERAFFGSSSRKLYDALEGVEREWSGS-----         | 214 |
| Pb-CBSn-PB1B | -----DIFGLLDITKCLYEALDKMERAYGSSSRKLYDALEGVEREWSSS-----          | 179 |
| Bd-CBSn-PB1  | NEFDEAAGGTSVVGLLDITKCFVERIDDLERKVNEDLNIISAMEALERRGTV-----       | 189 |
|              | * * *                                                           |     |
| Mg-CBSn-PB1  | -----SQPQQIIQYVEALRTKMSGPTLESVLNG-----MPPTTVGVKTSVKEAAQM        | 237 |
| Fg-CBSn-PB1  | -----TQPQQIIQYVEALRSKMSGPTLETVLNG-----VPPTTVSVRTSVREAQAL        | 290 |
| An-CBSn-PB1  | -----SQPQQIIQYVEALRSKMSGPTLESVLDG-----MPPTTVSVRTTVKEAAAL        | 301 |
| Yl-CBSn-PB1  | -----SQPAQIIQYVEALKQRMGPDLLESVLDG-----TPPTYVDVRTTVFEAASL        | 258 |
| Ca-CBSn-PB1  | -----EQPHHVVFQYFETLKNKMGPTLEDALDAN-----TVPTYVNVKASVHEATML       | 244 |
| Sp-CBSn-PB1  | SSSVSGNHAAEFLEYVESLKKKASGLEIMSLIDSS-----EEPFLVGRTRTTVAEATES     | 282 |
| Cc-CBSn-PB1  | -VGSNPQAA-AMLAWAEKREKTALPDLTTVMDSR-----THPATVGPKTTVRDVAKL       | 259 |
| Lb-CBSn-PB1  | -VGSNPQAA-AMLAWAEKREKTALPDLTTVMDSR-----TQPATVGPKTTVREVAKL       | 256 |
| Pp-CBSn-PB1  | -LGANPQAA-AMLSYVESLREKTALPDLTSMDSR-----TQPATVGPKTTVKEAVL        | 256 |
| Pg-CBSn-PB1  | -RGTTPGAVNPLMAYVEALRNKMSFPDLGSLDAR-----TSAATVGVKTSVKEAAVL       | 329 |
| Pb-CBSn-PB1A | -----PVQLAQYMETLRDKMSCPDLNTVLDG-----SLPAQVSVKVNVRDVARL          | 258 |
| Pb-CBSn-PB1B | -----PIQLVQYMEALRDRMSCPDLHSLVLDG-----SPPPEVDVKVNVREIAKM         | 223 |
| Bd-CBSn-PB1  | -----AEHVGVRQHHCQPDVGFVLTQTIIGGQLEHGTVPEVSIKSSVRDAARI           | 237 |
|              | * *                                                             |     |



Mg-CBSn-PB1 TRERL-----DSVAPGDSASHAGVESPGHSIVQHSPELPV-SEIPFPFKFK 433  
 Fg-CBSn-PB1 VRDLN-----DTVAPGDSASHVGMESPPRSILPDVLEHQPELPPFPFKFK 486  
 An-CBSn-PB1 SFDAR-----DSVLPNESASHHGGD-----EHSEFHHGELSPFPFKFK 487  
 Yl-CBSn-PB1 SHSELAQFGV-----GEVGPSDSISTDGYDRP-----GSNAAGMIATMPFQFKFK 450  
 Ca-CBSn-PB1 TPSEFHSFN-----VDIKPSDSVSHVNTSPLKAS-SFKMTSSMTVDEIPFIFKFK 453  
 Sp-CBSn-PB1 SQKPMPTPENGSNSFA-ASPYLQPYNSASQLAPSYVGLPQYHGNPSFVEQALQDLVQPT 558  
 Cc-CBSn-PB1 HS-EVHPNDSASVVDD-DNGSMLS-YSRKKGVSVP---LGSAP----VQDDGTYYVFKFR 470  
 Lb-CBSn-PB1 HS-EVHPNDSASVIDD-DPVSVLDGYPRHKGLNIP---SGAAP----IPVDDGTYYVFKFR 477  
 Pp-CBSn-PB1 HSPEVHPNDSASMVDEQEEHSVLEGYSSKQGEPLP---SIVGPPVPLPAVDDGTYYVFKFR 482  
 Pg-CBSn-PB1 PGSELAPNDSASVVQE-DYESALAGRSTLQSVTSSQPFTGMVP----LDYDDGTYYLKF I 554  
 Pb-CBSn-PB1A SISFSQLHGFPEISPN-ESASMAHNEENRSANSS---HNTRPTKTSNGGDGSAFAKFT 469  
 Pb-CBSn-PB1B SLSYTHLQGYAEILPN-ESASMVATNDDALSTISS---RNIR---THGRD-DGTFSEKFT 430  
 Bd-CBSn-PB1 MSNRQSLQLQRTLSPHPDEYSSMLRSQIQNDPDPN---MFTFKLKMTRTNGKVFRRFS 460

Mg-CBSn-PB1 AP--SGRVHRLQVIASHGVAFITNVTSKLGGE----IEAVGGAPEVTEDEGQVRRGFALS 487  
 Fg-CBSn-PB1 AP--SGRVHRMKIVATDGEIAFVEATASKLGAE----ADNIGGVPDVEDGKIVGSGFALS 540  
 An-CBSn-PB1 AP--SGRVHRVNIPLAAGIAELVAQVTAKLGPE----VEAVGGAASCADGVLNNTGYALS 541  
 Yl-CBSn-PB1 SP--SGRNHRLTVVNPAGVTALRTSISDKLS-----VG-----DVELVTQFYALS 493  
 Ca-CBSn-PB1 SPGIEGRVHRITLKASDGI IKLRELMNEKLDHK---DFAFLNVPKPDGNSSTQETYAIS 509  
 Sp-CBSn-PB1 DS--ASQIFPLNPQSPSQFTIKYRSIAGRVRHRLRLDGINVSDLRTAVEEREKEQLVTLT 616  
 Cc-CBSn-PB1 TP--SGRTHRFQSRHDD-IQLLREIVAGKLAID---PFFTEFTG-NPGDEVDPDNDFHLS 523  
 Lb-CBSn-PB1 TP--SGRTHRFQARHDD-VEHLREIVSGKLATD---PFFTEFQPKNEDSPKPDIDFHL 531  
 Pp-CBSn-PB1 TP--SGRTHRFQARHDN-VENLRDVIAGKLATD---PFFTYKTADPSEPPDPDFLLS 536  
 Pg-CBSn-PB1 AP--SGSAHRFQARYDS-YDFVREIVVVKIESD---PFIADHPS-NATTIKPDAQDFQLA 607  
 Pb-CBSn-PB1A TK--GGKTHR-IASTPK-HSQLELVRQKVLSE---HVPS----AAEG-----EWLSIS 512  
 Pb-CBSn-PB1B SL--SGRTHRFVAPLDS-YSQLFDSVLQKVATE---HLTLTGKRAGEGAADPSAEWLSIS 484  
 Bd-CBSn-PB1 SR--FNLSSEVYAQVCL-KTGAKSLIFEAAATS---GTHSMRSEHLDELTKDGEIVRIC 514

Mg-CBSn-PB1 YLDNEGDSVSIADQDLLEAILLARQSGRDKVDFVHDPEKPPVAVAAPAAVPPAPSEPV 547  
 Fg-CBSn-PB1 FLDDGEDSISITADHDLLEAVILARQAHHDKVDFVHDPEKPPVSAADPRHP----- 592  
 An-CBSn-PB1 YVDNEGDTVSIITDQDLVDAVYIARHARRDKVDFVHDPAQPPVIPAP----- 589  
 Yl-CBSn-PB1 YIDDEGDIVAITSDQDLDAVSI TRRAGLEKADLFHHPDNE----- 535  
 Ca-CBSn-PB1 YVDDEGDVVSITSDSLAECIRINLNQNEKADLYLHNPHEP----- 551  
 Sp-CBSn-PB1 YIDDEGDVVELVSDSLREAILLARRRGLPRLEVRGVAAF TNHLESS----- 663  
 Cc-CBSn-PB1 YTDDDGDSVLMTTDSADVAVTIARNHNQQRVVLFIQGGKGWAEAG-----D 570  
 Lb-CBSn-PB1 YTDADGDTVLITSDDDITDAVKIARTAGTDRVVLVQGGKGWAEAGA-----D 579  
 Pp-CBSn-PB1 YTDADGDIVLITSDTDSVDAVKIARAAGADRVVLYIQGGKGWADVMA-----E 584  
 Pg-CBSn-PB1 YLDDENDLVLITSDRDVTDVAVNQAKKQRKDRVVLHRLGKGSWGDSELS-----K 656  
 Pb-CBSn-PB1A YLDDEDEVLITSDADVQDAVRLARKLGQDRVKLFAHDSTSVTAHTA----- 559  
 Pb-CBSn-PB1B YMDDENDVLMSSDADVQDAVMLARKVGGSRVKLFIHD--AMIESIA----- 529  
 Bd-CBSn-PB1 YMDDENDVVHLESKDVEEAVLMSRRLGLTRLMIIYLGEPLQNAVTDSE-----Q 563

\* \* \* \*

Mg-CBSn-PB1 SVPIPTPASSVARERRRRKS-PASDESDEEESEDDGSSTLRRPRRHQRA-AAAQEQPL 605  
 Fg-CBSn-PB1 ----ATPSVSTGAGLRERRRWWPEEEEEEDDDSEDEHPARRRKSRAAHTH-AHAHEEQI 647  
 An-CBSn-PB1 ----VEPAPVKPVEVKT-----PASDDQLSEE-----SPIPKPRATQAYPAHPPEEQ 633  
 Yl-CBSn-PB1 ----VKPVVT-----QKLEDSVEIPVAAAAAPAEI 562  
 Ca-CBSn-PB1 ----APIEN-----IKSIHKSANRHNAGNDNGL 575  
 Sp-CBSn-PB1 ----HPIISTVDSSIGS-----ASVVEKGVANSIVDIHQPTAKA 698  
 Cc-CBSn-PB1 KSEAKAQEVS--AAALKEVKEVEKAEEDTPLVQTPPKATTPTT---RGVVHNPQEE 624  
 Lb-CBSn-PB1 KSEAKAAAVT--AAAQKEVKEVEKAEIIVVTPPPVEAPVAQTTPVQ--THRPRAPPAEE 636  
 Pp-CBSn-PB1 KSAQAQAEVA--AAAQAEKVEVEKAEVSLP-----EPVSNPPPP----PVHVVEDET 630  
 Pg-CBSn-PB1 KKAEEVYSTR--LKAVTEAEEIENELEERHSQAGSRDRLSTTRSSKKNAHNQTPVDPTL 714  
 Pb-CBSn-PB1A EPPAPVISLS--PPSDVSSKTRQEDDDTSSMSTRKRSSKRKSSRRNESEEPPEYES 617  
 Pb-CBSn-PB1B AEEAELIDNN--DDG-----EEDTAEETEEYIRKSSKKRSHRRHHYDD----- 573  
 Bd-CBSn-PB1 YSSGATPNVGHGGQVRYEDSHQSVVSEQLVEGGNSRINPVVVYNP INGGQGRDPPAS 623

Mg-CBSn-PB1 IAGVPELLLPGAIVTLA-VVIVGVFTISRISNNR- 640  
 Fg-CBSn-PB1 IAGVPELILPGAIVTLA-VAIVGVFTIARLTSR--- 680  
 An-CBSn-PB1 IAGVPNDLLLPGAIVTLA-AVIAGVFILSRATSR--- 666  
 Yl-CBSn-PB1 IPGLSNDLLLPGAVAVVA-AACAVAFSLGRAR----- 593



|              |                                        |     |
|--------------|----------------------------------------|-----|
| Ca-CBSn-PB1  | IFGIPNEILIPSALAVLG-ASIIIVGFTLSRK-----  | 605 |
| Sp-CBSn-PB1  | DKGNSKKPIYIGIVSSSI-VILAVSMWYLRRKR----  | 730 |
| Cc-CBSn-PB1  | VFGIPKDLLLPASIGALA-VVIIDGEWKPLDR----   | 656 |
| Lb-CBSn-PB1  | VFGIPKDLLLPASIGALA-VVIIGIFTISRLSSPSHY  | 672 |
| Pp-CBSn-PB1  | VMGIPKDLLLPASIGALA-AVILGVFTISRLSR----  | 662 |
| Pg-CBSn-PB1  | VAGVPKEFILPAATIGFLG-VVILGVFLASKPGH---- | 746 |
| Pb-CBSn-PB1A | NTGFPQELILPASIAFLG-VVILGVFAFSRVSPKHR-  | 652 |
| Pb-CBSn-PB1B | --GFPRDLLLPAATVFLG-VVVVGVAISRISPRHR-   | 606 |
| Bd-CBSn-PB1  | IVDYLKDAPLPVNIAISAGIIVVASYLIMKLQR----  | 656 |
