# Supplementary material for: Molecular evolution of Phox-related regulatory subunits for NADPH oxidase enzymes
Source: PubMed Central journal article supplement (PMC2121648; doi:10.1186/1471-2148-7-178), 2007-09-27
Supplement: 1471-2148-7-178-S15.pdf [file 1471-2148-7-178-S15.pdf]

**Additional File 15**

**Amino acid sequences of PB1 domain-containing proteins of *Dictyostelium***

*discoideum*. Sequences are obtained from the indicated servers: GenBank™

(<http://www.ncbi.nlm.nih.gov/>)

>Dd-PB1-A: GenBank No. XP\_639165

MSWLNNPSQNFVDPFIRIKCILGDDIRIIFNSNISYGGMLNQLQDFQCPISIHQYEDYEGDKVTV  
KSKDDIMEAL TMYFELKALNPTKIISTKFFLKQLPPQSQPLSSSLPTQSLILNNNNNNNNNNLMN  
MNMNMNLMNMSNNSGSSSSNNIVIPQQQGNRKGSNAPPLRTPPPSPSSSPKNSPPFLGNNSNTS  
INILDFYSLNGSNNSGGTGSNNGIGSSSREITPPLRTPPGSPRFALNNSNSNSNSSSVNNIPTNNNN  
NNHHHHIHLNLSNPSPPPPLRTPPPSPSSSPSSSPQSSSIFEFQTFDFHEELSKNNSPKNSNFLNTID  
QPHQIYQPHQPHYQQQQQQQMYNFNQPLSPSPPLQSQKQQQQQQQQQQQQQQQQQQQQQQ  
QQQQQQQQQQQQQQFNNNSFENGKIKLPRPLSPTFLNINNNIINSNLNNNNNNNNNNNNNNNNNN  
NNNNNNIIQHTDFPSLIINEHEELISNHNIKWQKGQILGRGGYGSVYLGKDKDTGELFAVKQLEIV  
DINSDPKLKNMILSFSKEIEVMRSLRHDNIVRYLGTSLDQSFLSVFLEYIPGGSISLLGKFGAFSEN  
VIKVVYTKQILQGLSFLHANSIIHRDIKGANILIDTKGIVKLSDFGCSKSFSGIVSQFKSMQGPYWM  
APEVIKQTGHRSSDIWSLGCVIVEMATAQPPWSNITELAAVVMYHIASSNSIPNIPSHMSQEAADF  
LNLCFKRDPKERPDANQLLKHPIFIMNLDDNIQLPTISPTTTLSTNTTNTTATTTTTNATNSNIQ  
QQQQQQQPPTRTQRVSISAGSSNNKRYTPPISTSTSSSSSILNNSINILPINLILIFREIKPNFVN  
TLRSVCKHWKQIIDDDELWNKYCSDRLINKSKFEESITWKSNIYKIYKQKQVWFHNKLNHSTLK  
GHDKGVFCVKLIDDQGMVLSGGEDKLLKVDISGNHHHHHSGIVGSIKKSGLNIINNNNSN  
SNSSSNSSSSNSRYLFSLKGHSGCIKSVDYQRQSGSDVSRVFTASADFTCKIFSLKTKKTLFTYTN  
HQEAVTCINYLGDVENKCITSSLDKTIQLWDAETGSCLSTLRGHTGGIYCVKTDQVATHGNGYN  
HLVVSASVDKTSNVWDTRSSSKVRSFTQHTEDVLCCYVFDQKVVTGSCDGTIKLWDIGTGKTI  
TFIPSETRQKNYVWTVQFDQSKIISGKTGIIRIWDIYNERDSRSIGGHHETIFSLQFNNQKLITGSL  
DKLVKIWSID

>Dd-PB1-B: GenBank No. XP\_646538

MVNILIKIQHNDDTRRVSMERDPTFLELRKMTVTFFKINSFLIKYFDEDKDLITITSDNDLKEAFSI  
ATTSPRTVRLVFSKTEEESSETINNNNTTPSINNYQNPLSNSVNNNNNNNNNNNDNNTMNLKPLI  
DSILANPNIAQLASASAVSCLTPKVHTSVYGIPTTGTDTQIENLLSNLGSQNWINEIVQNSLSNIF  
KPNVNNNNQNQNQSTTTNNNTTTTTTTSTTKNEEKQKTEKNENMVEHVGITCDGCDKVFNG  
RYKCTVCHDYDLCECESRGDQVHPTSHPLLKIAQPTPISCSWQHSNAGRSQPHGFGGGRCTRK  
VYAARYLADISIKDGSVIPKGSFTKTWRLRNDGKTSWPENTTSLFSLSGDRFQYQTDIFVPVCQP  
GQDIDISVDLVAPTKGRYTGYWRLSTPEGFGFGQSIWVDIYVIADEDDNKKQQPIIQEEKQEE  
QKDVVQRLPDSDEDELLKQEKELEEEEEEEEEKDEPKIEEADSFCFLPFTSPFSPFSIQNNV  
PASVQVPSEISNSFNIPVAEQQQEKINNTSNNSNYQLPLPVVEQEIIENVQPQVEELPKLE  
ELSVNGEQEDIRRKCI GTLVSMGFSNTPNIIIEIKRYNFNINEIIDHLLSNQE

>Dd-PB1-C: GenBank No. XP\_644298

MNLIKSELENDKRRFRLKECSFSCLCYTLASIYSFYNDMIYSIFYLDNENEWITLASTDDLKESYS  
LCPSLIRIKIIVLDLTINNNNNNNNNNNNSCKLLLNNHSSNSNIIYNSNSNSNNTSTNNNNNN  
NNNNNNNNNNNNNNNNNTTNNNNYHNNINNSNSNKKIIDIASQLSNDIRSQMNNLLSGTL  
ASFLPEILEKTIPHTIPILVATISSMKAEAEQNNYDEPTFYNNKDKHYKSTDESQHINIKSAGNNIPT  
SKSSVELSVNKKSVASNNNNNNNVNNSNTSNNNIINNNNVSKPQPIQNVMSQSSPNLFTTNN  
NNTTCSNINSSTGSMEMPMEINPTTQYSIISSTPASTSLPPLSATTSTFLPTSSTTSNNNAGTSNGFTSIT  
NSNNNNNNNSNNNNNNNNSSILSQSVPSVNLINKKPPSSPILSLFSKSSITPIQTSSISLSPGISPFS  
NPLDGSLLINPETTPSQSSSFFRPVSPTSISSENNNTNSNTTVNNNNNNNDTSPLKRKLSRFSFFS

SILGNKNNNTSTNTTKMDSPEISSTISDISTVDCSTTSSSTNQPNSTSVIKLDIEQEKKDDQEKQVDDL  
QFGLIIEPMLPLNVMEDLNNTITNDDNNNNNNNNNNNNNNNNNNNNINDDDVGDSLVNDINNQNDEK  
NKNDIGSGSIVIVEDCISTQNNNDNNNNNNNNKNNIISNSLTVDENDDSGRSSASMDYNETSLNN  
NANTTKTTTNHLLIINNGLELLSCDDDDDEDEITKEIESVFLKQQQQKLQQQQQQQQQQQQQQQQ  
QQQQQQQQQQQQQQQQQQQQQQQQQQQQQQQQ

>Dd-PB1-D: GenBank No. XP\_638776

MVDQPPKFWFSLGCHGNNSANNILAPPNPTKENNNSSNGSINGYGGNTNLDSTTLNVTLGSEM  
KSITVPKSSTYKDMISTIKDKFGVNSKSTLCIKCENKDGEMFSLASDCHVKKAYNQPPENQPKEL  
RLVVKEIPQKKCDMFHNSILSFFSNCSNSNTIAQNYTSTQPPASQSSLQHLATQVPDYLKPSN  
NNKSDFTPPTSSPSYLSNNNNNNNNNNNNNNNNNNNNNNNNNNNNNNNNNNNNNNNNNNNNN  
LNSNIGTSTNNTNINLRFSLFQMSNSSTNNISNIKNMGINQNINNSLNRGFFAKNNQTSLCMGSH  
NSNLNNNNNNNNNNNNNNNNNNNNNNNNNNNNNNNNNNNNNNNNNNNNNNNNNNNNNNNNNN  
INTKSNNGINNNLSPSQQQHQSQQKLNTTLQHVTSNPQLNMSTSSFMTSASMNSNIGSDTETM  
KRNESFDNFMVEMEDDSSEPQSQSYQQNQSIINNGTALLNQLNDEVEFGDEQQQEKQKIINN  
GKPPTSTPMCREVGSFIQDTTKLFYKLRQTSDPKEMSAIKELICEKIQDSLTTMPWLLGFFPQLKQ  
FANQSCPVFVPPNTPPPSPLMTSPLLEMYQNPTSTFKPSSSVSSLSSTSTTTTTSSTVNQAS  
VYQVSPNVNINSIQSQLQLQNKIEVDMISKAYQESKKNQKIINEQQQQQQQRPIDFSSQSSANT  
TTDESSCSNSNNNNNNNSKHFLKIAGPTIHKGTTCAFCKFSPHIGNIYECNSCSYAFCELCKTDSA  
LQCPNDPTHKVMSSLSKQCKKLLKSKASQTGSSSVSASPNRGCPYKRKHPKPTFGVKFLNDIT  
LFFGSEVHPNECIVKTWRLNTGPTLKDCLLVRVCGNTRLKVPAILPIVSSGEEFSLVPIQIPLIP  
NKCEEYLVGGEYWRICTSDGVYFGDQLWISLVVKNREMISLSDQFNKLSSQCNSTSQQNQQQQQQ  
QQQQQQQQQQQQQQQQQQQQQQQQQQQQQQQQQQQQKTTTTTSTCTCRNNNLISCNCQVKN  
STNFNSCLN

>Dd-PB1-E: GenBank No. XP\_635325

MGITYKSNFEGDVRRFSSDHPLTYTRLQDKLVNLYNLYEISFGITYLDDGDNITIADAKDLEEAH  
NLLGNEILRLTITRKLNENKNINSSSSSSNNNSNNNSNNNNNIDSLFVQLLSNQFVQQMIPQVMNSL  
ATNPALMTSIIQTAGSALRNNGVNNNNNNNSNNNTNNNNNNNNNNVNSGDNNNNNNINCNIKRNS  
PHLLNASLGNFHTHSTDSIVATLKPIIDEENNGNNNNNTTRITLTSNGNESCSNGSFSSSISFEMV  
NKESDSDNQYSTSSSTSSATSNSHSLNRRPSPMENLNKSPSTIVSSSSSSSSSSSSSTSSST  
TTTTTTTLPPTTTTNNRLSGIPKSIFNILPFTNTTHSSNNNNNSNKIEIKPKQDEPSNVNNTLSS  
SKPIATPTTATPTSQQQQQTNSSSPKQDRNMSTSPQPPSHPHNSPNHLFQHNFSNPYIYQNGNVG  
ATQPPPLQSPFIPQPVAPLVQQQPLPSAPLSQDQQQQQQQQQQQQQQQQQQQQQQQQQQQQQQ  
QQQQQQQQPLPTAPLSQSQEQQQPLSSESIFIKFEALQISESEAIKLFEKYGGDLKIFSEIKN

### Alignment of PB1 domains of Dd-PB1-A to -E

Each PB1 domains were identified by Pfam search program

(<http://www.sanger.ac.uk/Software/Pfam/search.shtml>). Amino acid sequences were

trimmed to the length of PB1 domain and were aligned. Dd-p67-like and Fg-Bem1 were

used as references. *Red* and *blue letters* indicate the amino acid residues corresponding

to K355 and K382 of PB1 domains of human p67*phox* and four acidic amino acid

residues (D289, D291, D293 and D302) of OPCA motif of human p40*phox* PB1 domain,

respectively.

Dd-PB1C -MNILIKSELENDKRRFR-LKECSFSCLCYTLASIYSFYNDMIYSIFYLD-NENEWITLAS  
Dd-PB1E -MGITYKSNFEGDVRRFSSDHPLTYTRLQDKLVNLYLY-EISFGITYLD--DGDNITIAD  
Dd-PB1B MVNLILKIQHNDDTRRVSMERDPTFLELRKMTVTFFKIN---SFLIKYFD-EDKDLITITS  
Dd-PB1D --STTLNVTLGSEMKSITVPKSSTYKDMISTIKDKFGVNSKSTLCIKCEN-KDGEMFSLAS  
Dd-PB1A ---IRIKCILGDDIRIIFNSNISYGGLMNQLEQDFQCP---ISIHQYED-YEGDKVTVKS  
Dd-p67-PB1 --KITLKVIFYKDRRLI-QIPVPCNLSTFIQKIELKFEIT---ISDKFSFQ-LDGEENEINS  
Fg-Bem1-PB1 --AMKIKMYFNGLIAIRVPTDISFQALYDKICDRLKIPANEEIQLFYKDEPTGDKPSMIS

Dd-PB1C TDDLKESYSLCP-----SLIRIKIIVL 80  
Dd-PB1E AKDLEEAHNLLGN-----EILRLTITRK 80  
Dd-PB1B DNDLKEAFSIATT-----SPRTVRLFVS 80  
Dd-PB1D DCHVKKAYNQPEN-----QPKELRLVVK 134  
Dd-PB1A KDDIMEALTMFELKALNPTKIISTKFFL- 98  
Dd-p67-PB1 QVQLDKMICM-----EINEINVKD- 383  
Fg-Bem1-PB1 DNLDLDFALQR-NE-----KLLLYVEAV- 590
