# Supplementary material for: Molecular evolution of Phox-related regulatory subunits for NADPH oxidase enzymes
Source: PubMed Central journal article supplement (PMC2121648; doi:10.1186/1471-2148-7-178), 2007-09-27
Supplement: 1471-2148-7-178-S17.pdf [file 1471-2148-7-178-S17.pdf]

## Additional File 17

### Alignment of hypothetical p67phox-like (hypo-p67-L) proteins of *Arabidopsis*

*thaliana*. The following names were used to describe species of sequences: At (as *A. thaliana*), Os (*O. sativa*). *Gray* and *yellow boxes* indicate the amino acid sequences of TPR and of PB1 domains, respectively.

|               |                                                                                                                                                                                                                                                                          |     |
|---------------|--------------------------------------------------------------------------------------------------------------------------------------------------------------------------------------------------------------------------------------------------------------------------|-----|
| Athypo-p67-L1 | MGKPTAKKKNPE-TPKDASGGGGGGGKSGKTYHRSTSR-----                                                                                                                                                                                                                              | 38  |
| Athypo-p67-L2 | MGKPTGKKKNNNYTEMPPTESSTGGGKTGKSFDRSATK-----                                                                                                                                                                                                                              | 39  |
| Athypo-p67-L4 | MGKSGGRKKKSGGSNSNSQVNSSETSGLSKP-STIVNG-----                                                                                                                                                                                                                              | 38  |
| Athypo-p67-L3 | MEKQNEEISTDDAETSQSQLVDDSKVETLDDCVSKVETLDDCVSKAETLA                                                                                                                                                                                                                       | 60  |
| Athypo-p67-L1 | -----VFDEDME                                                                                                                                                                                                                                                             | 45  |
| Athypo-p67-L2 | -----SFDDDMT                                                                                                                                                                                                                                                             | 46  |
| Athypo-p67-L4 | -----GVDFDAS                                                                                                                                                                                                                                                             | 45  |
| Athypo-p67-L3 | DCVSKVETLDDCVSKVETLDDCVSKVENLDDCVPKVETLDDCVSEVETLD                                                                                                                                                                                                                       | 120 |
| Athypo-p67-L1 | IFISR <b>A</b> LELKEEGNKL <b>FQ</b> KRDHEGAMLSFDKALKLLPKDHIDVAYLRTSMASCYMQMGLG                                                                                                                                                                                           | 105 |
| Athypo-p67-L2 | IFINRALELKEEGNKL <b>FQ</b> KRDYEGAMFRYDKAVKLLPRDHGDVAYLRTSMASCYMQMGLG                                                                                                                                                                                                    | 106 |
| Athypo-p67-L4 | IFLKR <b>A</b> HELKEEGNKK <b>FQ</b> ARDYVGALEQYENGIKLIPKSHPDRAV <b>FHS</b> NRAACL <b>IEM</b> KPI                                                                                                                                                                         | 105 |
| Athypo-p67-L3 | DCVSKA <b>Q</b> GLKEEGNKL <b>FQ</b> KRDYDGAMFKYGEAIKILPKDHVEVSHVRANVASCYMQLEPG                                                                                                                                                                                           | 180 |
| Athypo-p67-L1 | EYPNA <b>I</b> SECNL <b>A</b> LEASPRYSKALVRRSRCYEALNKLDYAFRDARIVLNMEPGNVSANEIF                                                                                                                                                                                           | 165 |
| Athypo-p67-L2 | EYPNA <b>I</b> NECNL <b>A</b> LEASPRFSKALLKRARCYEALNKLDYAFRDSRVVLMNEPENVSANEIF                                                                                                                                                                                           | 166 |
| Athypo-p67-L4 | DY <b>E</b> SV <b>I</b> SECS <b>M</b> ALKSQ <b>P</b> GF <b>T</b> RALLRRARAFEAVGKFDLAVQDVNVLLGSDPNHKDAGEIF                                                                                                                                                                | 165 |
| Athypo-p67-L3 | EFAKA <b>I</b> HECDL <b>A</b> LSVTPDH <b>N</b> KALLKRARCYEALNKLDLALRDVCMVSKLDPKN <b>P</b> MASEIV                                                                                                                                                                         | 240 |
| Athypo-p67-L1 | DRVKKVLVDK <b>G</b> IDVDEMEKDFVDVQPVCAARLKKIVKERLRKSKKKKSGGKDEELKSPK                                                                                                                                                                                                     | 225 |
| Athypo-p67-L2 | ERVKKVLVGK <b>G</b> IDVDEMEKNLVNVQPVGAARLKKIVKERLR--K <b>K</b> KKKSM-----                                                                                                                                                                                                | 214 |
| Athypo-p67-L4 | EAVKNCLG-PHQDLQSRPFTCS <b>S</b> WCFGRFRS <b>Y</b> CWTWSCLPSRVNHK <b>G</b> V-----                                                                                                                                                                                         | 214 |
| Athypo-p67-L3 | EKLK <b>R</b> TLESKGLRINNSV <b>I</b> ELPPDYVEPVGASPAALWAKL <b>G</b> KVRV <b>K</b> TKK-----                                                                                                                                                                               | 290 |
| Athypo-p67-L1 | VVVVDK <b>G</b> DEA <b>E</b> GRNKP <b>K</b> E <b>E</b> K---SDKSDIDGKIGG <b>K</b> REEK <b>T</b> SFKSDKGQ <b>K</b> KS <b>G</b> GN <b>K</b> AG                                                                                                                              | 282 |
| Athypo-p67-L2 | ---T <b>M</b> TNGGNDGERKS <b>V</b> EAV---VEDAKVD---NG <b>E</b> E-----VDSGRK---G <b>K</b> AI                                                                                                                                                                              | 252 |
| Athypo-p67-L4 | ---TSPVGS <b>V</b> SLPNL <b>V</b> MEGL---RGRQ <b>V</b> VN-----PVTENGGS <b>V</b> SK <b>G</b> QASRV                                                                                                                                                                        | 255 |
| Athypo-p67-L3 | ----SNQ <b>V</b> E <b>E</b> KSEGE <b>G</b> ED <b>V</b> E <b>P</b> E <b>K</b> NN-----VLA <b>E</b> K <b>G</b> KE <b>K</b> IK <b>M</b> K <b>V</b> K <b>G</b> K                                                                                                              | 329 |
| Athypo-p67-L1 | EERKVEDKVVMDKEV <b>I</b> ASEIVDGGGSK <b>E</b> GATV <b>T</b> RTIKLVHGDDIRWAQLPLD <b>S</b> TVRLV                                                                                                                                                                           | 342 |
| Athypo-p67-L2 | EEKLEDKVAVMDKEV <b>I</b> ASEIK-----EDATV <b>T</b> RTIKLVHGDDIRWAQLPLD <b>S</b> SVLV                                                                                                                                                                                      | 305 |
| Athypo-p67-L4 | VLKPVSHSPKGSKVEELGSSSVAVVGK <b>V</b> QEK <b>R</b> IR <b>W</b> RPLKFVYDHD <b>I</b> RLGQMPV <b>N</b> CR <b>F</b> KEL                                                                                                                                                       | 315 |
| Athypo-p67-L3 | QSDKRS <b>D</b> TSKEQEK <b>V</b> IEEELLVIG-----VEDV <b>N</b> KDV <b>K</b> FVY <b>S</b> DD <b>I</b> RLAEL <b>P</b> IN <b>C</b> TL <b>F</b> KL                                                                                                                             | 384 |
| Athypo-p67-L1 | <b>R</b> DV <b>I</b> DR <b>F</b> PAL <b>R</b> G <b>F</b> L <b>I</b> KYRDTE <b>G</b> DLV <b>T</b> IT <b>T</b> DEL <b>R</b> LA <b>A</b> ST <b>H</b> -----DK <b>L</b> G <b>S</b> L                                                                                          | 389 |
| Athypo-p67-L2 | <b>R</b> DV <b>I</b> KDR <b>F</b> PAL <b>K</b> G <b>F</b> L <b>I</b> KYR <b>D</b> SE <b>G</b> DLV <b>T</b> IT <b>T</b> DEL <b>R</b> LA <b>A</b> ST <b>R</b> -----E <b>K</b> L <b>G</b> S <b>F</b>                                                                        | 352 |
| Athypo-p67-L4 | <b>R</b> E <b>I</b> V <b>S</b> SR <b>F</b> PS <b>S</b> KAV <b>L</b> I <b>K</b> Y <b>K</b> DN <b>D</b> GLV <b>T</b> IT <b>T</b> ST <b>A</b> EL <b>K</b> LA <b>E</b> SA <b>A</b> DC <b>I</b> L <b>T</b> KE <b>P</b> DT <b>K</b> SD <b>S</b> V <b>G</b> M <b>L</b>          | 375 |
| Athypo-p67-L3 | <b>R</b> EV <b>V</b> HER <b>F</b> PS <b>L</b> RA <b>V</b> H <b>I</b> KY <b>R</b> D <b>Q</b> E <b>G</b> DLV <b>T</b> IT <b>T</b> DE <b>L</b> RM <b>S</b> EV <b>S</b> S-----RS <b>Q</b> G <b>T</b> M                                                                       | 431 |
| Athypo-p67-L1 | <b>R</b> LY <b>I</b> A <b>E</b> V <b>N</b> PD <b>Q</b> E <b>P</b> TY <b>D</b> G <b>M</b> S <b>N</b> T---ESTDKVSKRLSS <b>L</b> AD <b>N</b> GS <b>V</b> G <b>E</b> Y-----V <b>G</b> SD <b>K</b> A                                                                          | 438 |
| Athypo-p67-L2 | <b>R</b> LY <b>I</b> A <b>E</b> V <b>S</b> PN <b>Q</b> E <b>P</b> TY <b>D</b> VD <b>I</b> DN <b>D</b> ---ESTDK <b>F</b> AR <b>G</b> SS <b>S</b> VAD <b>N</b> GS <b>V</b> G <b>D</b> F-----V <b>E</b> SE <b>K</b> A                                                       | 401 |
| Athypo-p67-L4 | <b>R</b> L <b>H</b> V <b>V</b> D <b>V</b> S <b>P</b> E <b>Q</b> E <b>P</b> ML <b>S</b> R <b>K</b> RR <b>K</b> ME <b>E</b> K <b>P</b> V <b>I</b> E <b>V</b> ISS <b>P</b> TES <b>L</b> SE <b>T</b> EIN <b>T</b> E <b>K</b> T <b>D</b> KE <b>V</b> E <b>K</b> E <b>K</b> A  | 435 |
| Athypo-p67-L3 | <b>R</b> F <b>Y</b> V <b>V</b> E <b>V</b> S <b>P</b> E <b>Q</b> DP <b>F</b> FG-----RL <b>V</b> EM <b>K</b> KL <b>I</b> T <b>A</b> DS <b>F</b> K <b>A</b> K <b>V</b> N-----G <b>R</b> G                                                                                   | 470 |
| Athypo-p67-L1 | SGC-----FENW <b>I</b> F <b>Q</b> FA <b>L</b> FK <b>N</b> H <b>V</b> GF <b>D</b> SD <b>S</b> Y <b>V</b> DL <b>H</b> DL <b>G</b> M <b>K</b> LY <b>T</b> E <b>A</b> ME <b>D</b> AV <b>T</b> G <b>E</b> DA <b>Q</b>                                                          | 489 |
| Athypo-p67-L2 | STS-----LE <b>H</b> W <b>I</b> F <b>Q</b> FA <b>L</b> FK <b>N</b> H <b>V</b> GF <b>D</b> SD <b>S</b> Y <b>L</b> EL <b>H</b> N <b>L</b> G <b>M</b> K <b>L</b> Y <b>T</b> E <b>A</b> ME <b>D</b> IV <b>T</b> G <b>E</b> DA <b>Q</b>                                        | 452 |
| Athypo-p67-L4 | SS <b>S</b> ED <b>P</b> ET <b>K</b> E <b>L</b> EM <b>D</b> DL <b>F</b> DF <b>A</b> HL <b>F</b> R <b>T</b> H <b>V</b> G <b>I</b> DP <b>D</b> A <b>H</b> DL <b>H</b> EL <b>G</b> M <b>E</b> LC <b>S</b> E <b>A</b> LE <b>E</b> T <b>V</b> T <b>S</b> E <b>K</b> A <b>Q</b> | 495 |
| Athypo-p67-L3 | G <b>C</b> K-----V <b>E</b> W <b>M</b> IE <b>F</b> A <b>H</b> L <b>F</b> K <b>I</b> Q <b>A</b> R <b>I</b> DS <b>R</b> CL <b>N</b> L <b>Q</b> EL <b>G</b> M <b>K</b> L <b>N</b> SE <b>A</b> ME <b>V</b> V <b>T</b> S <b>D</b> A <b>A</b> Q                                | 521 |

|               |                                                               |     |
|---------------|---------------------------------------------------------------|-----|
| Athypo-p67-L1 | ELFQIAADKFKQEMGALALLNWGNVHMSKARKQVCIPEDASREAIIEAVEAAFVVTQNEYN | 549 |
| Athypo-p67-L2 | ELFDIAADKFKQEMAALAMFNWGNVHMSKARRQIYFPEDGSRETILEKVEAGFEWAKNEYN | 512 |
| Athypo-p67-L4 | PLFDKASAKFQEVAAALAFFNWGNVHMCARRKRIPLDESAGKEVVAAQLQTAYEWWKERYT | 555 |
| Athypo-p67-L3 | GPFDRAAQQFQEVAAARSLNLGYVHMSGARKRLSLQGVSGESVSEQVKTAYECAKKEHA   | 581 |
| Athypo-p67-L1 | KAAEKYEEAIKVKPDFYEALLALGQEQFEHAKLCWYHALKSKVDLESEASQEVVKLYNKA  | 609 |
| Athypo-p67-L2 | KAAEKYEGAVKIKSDFYEALLALGQQQFEQAKLCWYHALSGEVDIESDASQDVLKLYNKA  | 572 |
| Athypo-p67-L4 | LAKEKYEQALSIKPDFYEGLLALGQQQFEMAKLHWSYLLAQKIDISGWDPSETLNLFDISA | 615 |
| Athypo-p67-L3 | NAKEKYEAMKIKPECFEVLALGLQQFEEARLSWYVVLVSHLDLKTWPYADVQFYQSA     | 641 |
| Athypo-p67-L1 | EDSMERGMQIWEEMEECLNGISK-----LDKHKNMLRKLELDELDFSEASEEETVEQ     | 661 |
| Athypo-p67-L2 | EESMEKGMQIWEEMEEERRNGISN-----FDKHKELLQKLGLDGIFSEASDEESAQEQ    | 624 |
| Athypo-p67-L4 | EAKMKDATEMWEKLEEQRMDDLKNPNSNKKEEVSKRRKKQGGDGNEEVSETITAEAAEQ   | 675 |
| Athypo-p67-L3 | ESNIKKSMEVLEENLETGKESEPSQ-----AGKTDCLTHEKDLGSSTQNNPAKE        | 689 |
| Athypo-p67-L1 | TANMSSQINLLWGSLLYERSIVEYKLGPTWDECLLEVAVEKFELAGASATDIAVMVKNHC  | 721 |
| Athypo-p67-L2 | TANMSSQINLLWGSLLYERSIVEYKLGPTWDECLLEVAVEKFELAGASATDIAVMVKNHC  | 684 |
| Athypo-p67-L4 | ATAMRSQIHLFWGNMLPERSQVECKIGKDGWKNLDSAVERFKLAGASEADIATVVKNHC   | 735 |
| Athypo-p67-L3 | AGRLKSWIDLILCAVLYERSIMEYKLDQPFWRRESLEAAMEKFELAGTCKDDVVEIISEDY | 749 |
| Athypo-p67-L1 | SSESALGNQFLARIPNSGQVTTQWFSVYNNLRNAGMGFKIDEIVQAWNEMYDAKRWQM    | 781 |
| Athypo-p67-L2 | SSDNALEGN-----YVYL-----                                       | 697 |
| Athypo-p67-L4 | SNEAAATEEMR-----KRYLRLET-----LYPNKNYDIKSYET                   | 768 |
| Athypo-p67-L3 | VAGNLRDIRFH-----MEEIQIFDEIYEAKHWTN                            | 780 |
| Athypo-p67-L1 | GVPSFRLEPMFRRRAPKLHDIENVFSGPV                                 | 811 |
| Athypo-p67-L2 | -----                                                         |     |
| Athypo-p67-L4 | KTDSRLMNGCVTGK-----                                           | 782 |
| Athypo-p67-L3 | GIPSDQLEEILKRRRAENIFHVPNIAIQRG-                               | 809 |

### Comparison of TPR and AD domain between hypothetical p67phox-like protein (hypo-p67-L) of plants and human p67phox (1-212 residues) and NOXA1 (1-213

residues) proteins. The following names were used to describe species of sequences: At (as *A. thaliana*), Os (*O. sativa*), and Hs (as *H. sapiens*). Gray boxes indicate AD region of human p67phox and NOXA1 and predicted AD-like region of At-hypo-p67-L1 and L2. Red letters indicate crucial residues in TRP (D67 and R102) and AD regions (V204) of human p67phox. Asterisks indicated positions of residues that were identified in Figure 5 as conserved residues among all activator proteins (p67phox, NOXA1, and hypo-p67).

|               |                                                               |     |
|---------------|---------------------------------------------------------------|-----|
| Hsp67phox     | -MSLVEAISLWNEGVLAAADKKDWKALDAFS-----AVQDPHS--RICFNIGCMYTI     | 49  |
| HsNOXA1       | MASLGDLVRAWHLGAQAVDRGDWARALHLFS-----GVPAPPA--RLCFNAGCVHLL     | 50  |
| Athypo-p67-L1 | -IFISRALELKEEGNLFQKRDHEGAMLSFDKALKLLPKDHIDVAYL--RTSMASCYMQMG  | 103 |
| Athypo-p67-L2 | -IFINRALELKEEGNLFQKRDYEGAMFRYDKAVKLLPRDHGDVAYL--RTSMASCYMQMG  | 104 |
| Oshypo-p67-L1 | -VFLELSRELKEEGRLFNRRDYEGAAFKYDKAVQLLPSGGHADAAAHLRTRCAVQCYMRMA | 80  |

Athypo-p67-L3 -DCVSKAQLKEEGNKLQKRDYDGAMFKYGEAIKILPKDHVEVSHV--RANVASCYMQLE 103  
 Athypo-p67-L4 -IFLKRAHELKEEGNKKFQARDYVGALEQYENGIKILPKSHPDRAVF--HSNRAACLIEMK 178

\*\* \*

Hsp67 *phox* LKNMTEAEKAFTRSINRDKHLAVAYFQRGMLYYQTEKYDLAIKDLKEALIQLRGNQLIDYK 110  
 HsNOXA1 AGDPEAALRAFDAQVTKDTCMVGGFFQRGVANFQLARFQEALSDFWLALQLRGHAAIDYT 111  
 Athypo-p67-L1 LGEYPNAISECNLALASPRYSKALVRRSRCYEALNKLDYAFRDARIVLNMEPGNVSANEI 164  
 Athypo-p67-L2 LGEYPNAINECNLALASPRFSKALLKRRCYEALNKLDYAFRDRSRVVLNMEPENVSANEI 165  
 Oshypo-p67-L1 PAEHHRAIHECNLALAAAPRYSRALLRRAACFQALDRPDLAWEDEVRTVLAWEPANRAAREI 142  
 Athypo-p67-L3 PGEFAKAIHECDLALSVTPDHNKALLKRRCYEALNKLDLALRDVCMVSKLDPKNPMASEI 164  
 Athypo-p67-L4 PIDYESVISECSMALKSQPGFTRALLRRARAFEAVGKFDLAVQDNNVLLGSDPNHKDAGEI 239

\* \* \* \* \*

Hsp67 *phox* ILGLQFKLFACEVLYNIAFYAKKE-EWKKAEEQLALATSMKSEPRHSKIDK----- 161  
 HsNOXA1 QLGLRFKLAQWEVLHNVASAQCQLG-LWTEAASSLREAMSKWPEGSLNGLDS----- 162  
 Athypo-p67-L1 FDRVKKVLVDKGLDVEDEMEKDFVD--VQPVCAARLKKIVKERLRKSKKKKSGGKDEELK 222  
 Athypo-p67-L2 FERVKKVLVGKGLDVEDEMEKNLVN--VQPVGAARLRKIVKERLRK--KKKS----- 213  
 Oshypo-p67-L1 SDKVRAALEEKGVLEKEPVPVPPPEHKAVSAKGGKLLKSHKQCDSAIEGQELIHVEDY 202  
 Athypo-p67-L3 VEKLRKRTLESKGLRINNSVIELPPDYVEPVGASPAALWAKLGKVRVKKTKKS----- 216  
 Athypo-p67-L4 FEAVKNCLG-PHQDLQSRPFTCSSWCFGCFRRSYCWTWSCLPSRNVHKKGVTSPPVG---- 294

\* \*

Hsp67 *phox* -----AMECVWKQKLYEPVVIPVGRLEFRPNE-----R 188  
 HsNOXA1 -----ALDQVQRRGSLPPRQVPRGEVFRPHR-----W 189  
 Athypo-p67-L1 SPKVVVVVDKGDAAEGRNPKPEEKSDKSDIDGKIGGKREEKTSFKSDKGQKKKSGGNKAG 282  
 Athypo-p67-L2 ---MTMTNGGNDGE--RKSVEAVVEDAKVD-----NGEE-----VDSGRK-----GKAI 252  
 Oshypo-p67-L1 EQSEKTELKINGQENGENRAGKEQFDCNVPVKQEIIRTDQPEANGVGKHQYHMDKKNKGL 262  
 Athypo-p67-L3 ----NQVEEKSEGE--GEDVEPEKKNVLAE----KGKEK-----IKMKVK-----GKQS 256  
 Athypo-p67-L4 --SVSLPNLVMELRGRQVNPVTENGGSVS---KGQAS-----RV 331

\* \* \*

AD

Hsp67 *phox* QVAQLAKKDYLGKATVVASVVDQD----- 212  
 HsNOXA1 HLKHLEPVDFLGKAKVVASAIPDD----- 213  
 Athypo-p67-L1 EERKVEDKVVVMDKEVIASEIVDGGGSKKEGATV 316  
 Athypo-p67-L2 EEKKLEDKVAVMDKEVIASEIK-----EDATV 279  
 Oshypo-p67-L1 DK---EGKNGKPGKHSAGKKIRRADAKKQKHSAM 293  
 Athypo-p67-L3 DKR--SDTSKEQEKVIEEELLVIG---VEDV-- 283  
 Athypo-p67-L4 VLKPVSHSPKGSKVEELGSSSVAVVGKQEKRRIR 364
