# Supplementary material for: Molecular evolution of Phox-related regulatory subunits for NADPH oxidase enzymes
Source: PubMed Central journal article supplement (PMC2121648; doi:10.1186/1471-2148-7-178), 2007-09-27
Supplement: 1471-2148-7-178-S18.pdf [file 1471-2148-7-178-S18.pdf]

## **Additional File 18**

**ID numbers of PB1 domain-containing genes of *Arabidopsis thaliana*, except for hypo-p67-L genes.** Genes are identified using NCBI UniGene database ID numbers. The genes are available in NCBI database (<http://www.ncbi.nlm.nih.gov/>).

1. At.43530 protein kinase family protein
2. At.21300 protein kinase family protein
3. At.48395 protein kinase family protein
4. At.43754 protein kinase family protein
5. At.42436 protein kinase family protein
6. At.29723 CBS domain-containing protein / octicosapeptide/Phox/Bemp1 (PB1) domain-containing protein
7. At.35243 CBS domain-containing protein / octicosapeptide/Phox/Bemp1 (PB1) domain-containing protein
8. At.37545 CBS domain-containing protein / octicosapeptide/Phox/Bemp1 (PB1) domain-containing protein
9. At.71804 CBS domain-containing protein / octicosapeptide/Phox/Bemp1 (PB1) domain-containing protein
10. At.49212 CBS domain-containing protein / octicosapeptide/Phox/Bemp1 (PB1) domain-containing protein
11. At.24692 Ubiquitin-associated (UBA)/TS-N domain-containing protein / octicosapeptide/Phox/Bemp1 (PB1) domain-containing protein
12. At.43367 Octicosapeptide/Phox/Bem1p (PB1) domain-containing protein

13. At.19855 Octicosapeptide/Phox/Bem1p (PB1) domain-containing protein
14. At.27308 Octicosapeptide/Phox/Bem1p (PB1) domain-containing protein
15. At.50254 Octicosapeptide/Phox/Bem1p (PB1) domain-containing protein
16. At.61015 Octicosapeptide/Phox/Bem1p (PB1) domain-containing protein
17. At.27450 Octicosapeptide/Phox/Bem1p (PB1) domain-containing protein
18. At.70293 Octicosapeptide/Phox/Bem1p (PB1) domain-containing protein
19. At.4069 Octicosapeptide/Phox/Bem1p (PB1) domain-containing protein
20. At.35281 Octicosapeptide/Phox/Bem1p (PB1) domain-containing protein
21. At.27500 Octicosapeptide/Phox/Bem1p (PB1) domain-containing protein
22. At.19833 Octicosapeptide/Phox/Bem1p (PB1) domain-containing protein
23. At.53480 Octicosapeptide/Phox/Bem1p (PB1) domain-containing protein
24. At.51764 Octicosapeptide/Phox/Bem1p (PB1) domain-containing protein
25. At.72006 Octicosapeptide/Phox/Bem1p (PB1) domain-containing protein
26. At.71567 Octicosapeptide/Phox/Bem1p (PB1) domain-containing protein
27. At.67350 Octicosapeptide/Phox/Bem1p (PB1) domain-containing protein
